# Supplementary material for: Generalized kekulenes and clarenes as novel families of cycloarenes: structures, stability, and spectroscopic properties
Source: Royal Society of Chemistry journal article supplement (doi:10.1039/d3cp06306b), 2024-01-01
Supplement: d3cp06306b1.pdf [file d3cp06306b1.pdf]

# Electronic supplementary information

## Generalized kekulenes and clarenes as novel families of cycloarenes: structures, stability, and spectroscopic properties

Ke Du and Yang Wang\*

*School of Chemistry and Chemical Engineering, Yangzhou University, Yangzhou, Jiangsu  
225002, China*

E-mail: yangwang@yzu.edu.cn

# Contents

|    |                                                                                            |      |
|----|--------------------------------------------------------------------------------------------|------|
| 1  | DFT refinement calculations and comparison between xTB and DFT relative energies           | S3   |
| 2  | Comparison between DFT and experimental structures of [12]kekulene                         | S4   |
| 3  | Relative energies and free energies of looped polyarenes at the B3LYP-D3(BJ)/6-31G* level  | S5   |
| 4  | Simulated $^1\text{H}$ NMR spectra of kekulenes and clarenes                               | S7   |
| 5  | Simulated UV-vis spectra of kekulenes and clarenes                                         | S15  |
| 6  | Details on the construction of equiangular hexagons                                        | S23  |
| 7  | Simple HMO model for predicting relative energies of clarenes                              | S27  |
| 8  | IRI maps for $\pi-\pi$ stacking in equiangular hexagonal clarenes                          | S29  |
| 9  | Demonstration of construction of nonequiangular hexagons                                   | S31  |
| 10 | Simple HMO model for predicting relative energies of kekulenes                             | S32  |
| 11 | Lowest-energy kekulene and clarene isomers                                                 | S34  |
| 12 | Clar resonance structures for [30]clarene $\langle 2,8,2,8,2,8 \rangle$                    | S41  |
| 13 | IRI maps for $\pi-\pi$ stacking in nonequiangular hexagonal clarenes                       | S42  |
| 14 | Relative stability of $\pi-\pi$ stacking conformers                                        | S44  |
| 15 | Cartesian coordinates and absolute energies for lowest-energy kekulene and clarene isomers | S46  |
|    | References                                                                                 | S109 |

# 1 DFT refinement calculations and comparison between xTB and DFT relative energies

We performed geometry optimizations and vibrational frequency analyses, which verify the energy minima on the potential energy surface using the GFN2-xTB method<sup>1,2</sup> implemented in the xTB program (version 6.3.3).<sup>1,3,4</sup> We refined the xTB results at DFT level for all kekulene isomers containing up to 32 rings and all clarene isomers containing up to 54 rings. For larger size isomers of kekulene and clarene, we determined the lowest-energy structures by considering only those with xTB relative energies lower than 10 kcal/mol. Our assessment calculations showed that the relative isomer energies obtained from the GFN2-xTB calculations are consistent with those obtained at the B3LYP-D3(BJ)/6-31G\* level (see Fig. S1).

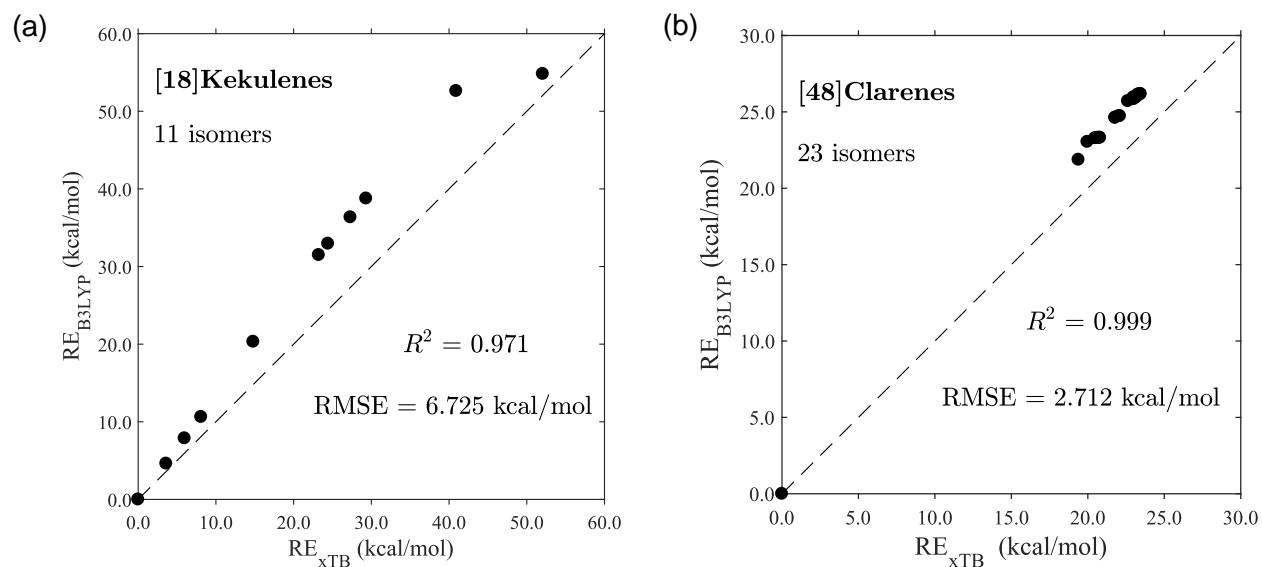

**Figure S1.** DFT relative energies,  $RE_{B3LYP}$ , versus xTB relative energies,  $RE_{xTB}$ , for (a) all 11 isomers of [18]kekulenes and (b) all 23 isomers of [48]clarenes. Squared correlation coefficient ( $R^2$ ) and root mean square error (RMSE) are provided in each plot.

## 2 Comparison between DFT and experimental structures of [12]kekulene

Fig. S2 shows the molecular structure of the experimentally synthesized [12]kekulene, [2,2,2,2,2,2]<sup>5-8</sup> computed at the  $\omega$ B97XD/cc-pVDZ level in vacuum. The representative CC bonds are labeled by small letters. The bond lengths are compared between the X-ray crystallographic measurements<sup>6,8</sup> and the DFT predictions, as summarized in table. As we can see, the DFT predicted geometry is consistent with the experimental values measured from XRD.

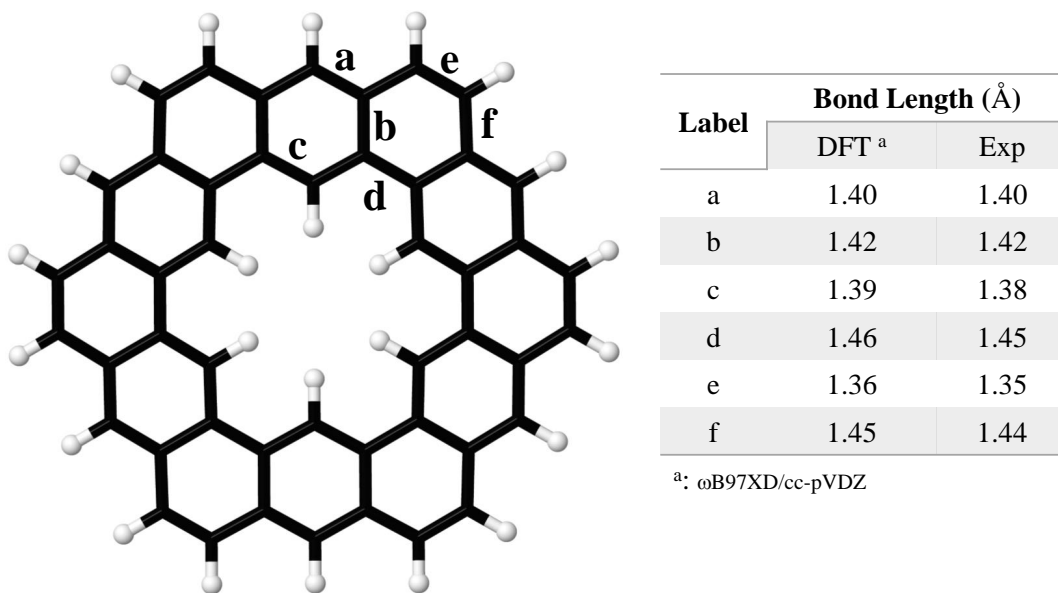

**Figure S2.**  $\omega$ B97XD/cc-pVDZ optimized structure of the experimentally synthesized [12]kekulene.<sup>5-8</sup> The representative CC bonds are labeled by small letters. Bond lengths of calculation and experiment are given in table.

### 3 Relative energies and free energies of looped polyarenes at the B3LYP-D3(BJ)/6-31G\* level

Fig. S3-S4 show the relative energies and relative Gibbs free energies (at 298.15 K and 1 atm) of different forms of looped polyarenes with a varying number of rings at the B3LYP-D3(BJ)/6-31G\* level of theory.<sup>9,10</sup> Compared with Fig. 5 in the main text, both the B3LYP-D3(BJ)/6-31G\* and the  $\omega$ B97XD/cc-pVDZ methods<sup>11,12</sup> give essentially consistent results. In addition, the relative Gibbs free energies also follow almost the same tendencies as those for the relative energies among looped polyarenes. Therefore, the B3LYP-D3(BJ)/6-31G\* and the  $\omega$ B97XD/cc-pVDZ methods lead to consistent results.

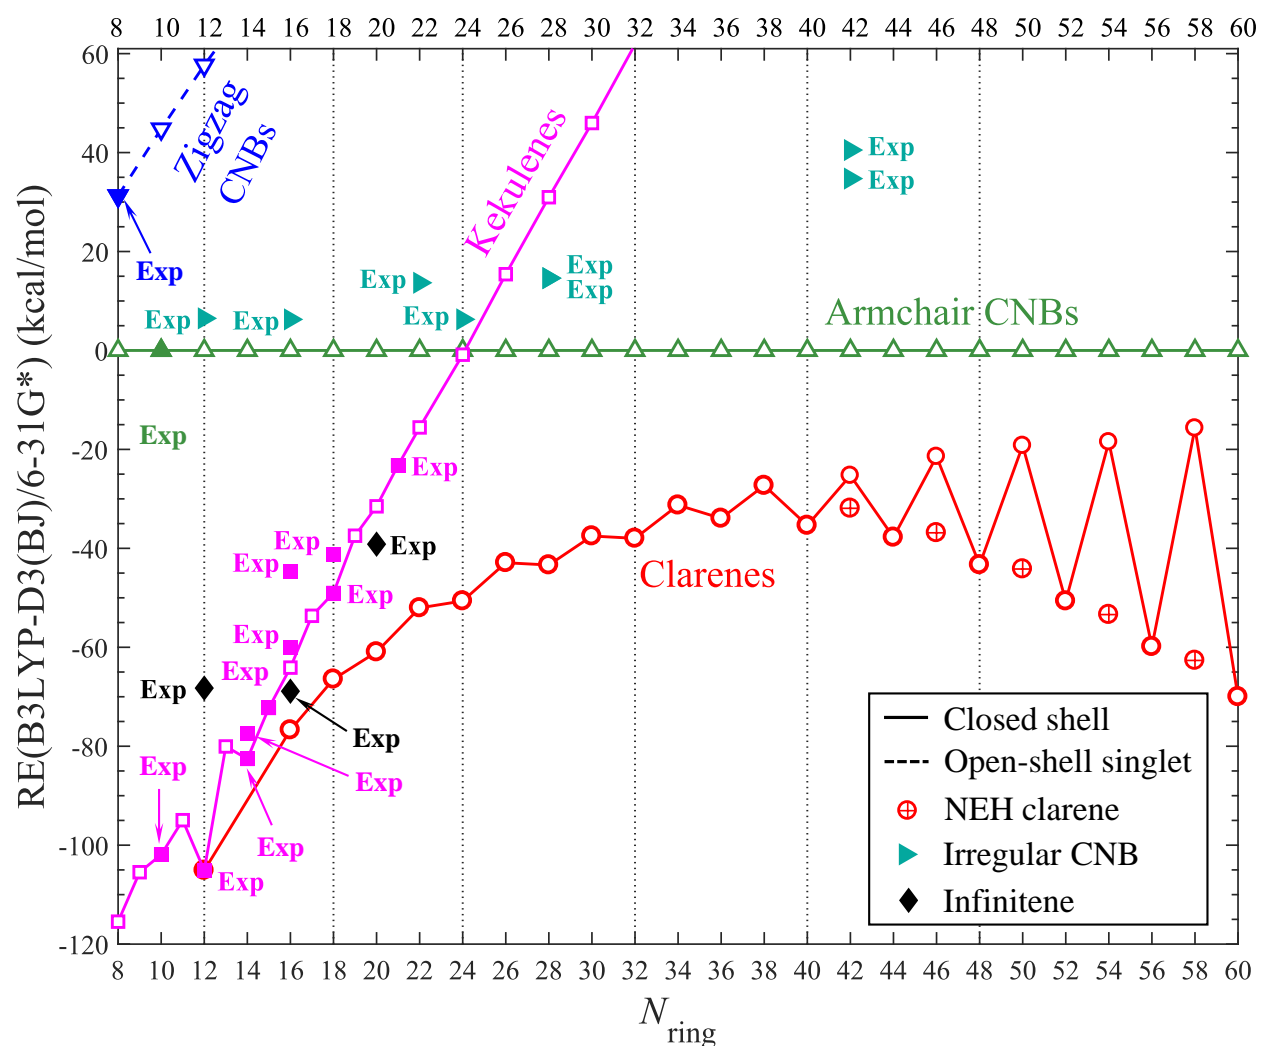

**Figure S3.** Idem Fig. 5 in the main text for the results obtained at the B3LYP-D3(BJ)/6-31G\* level.

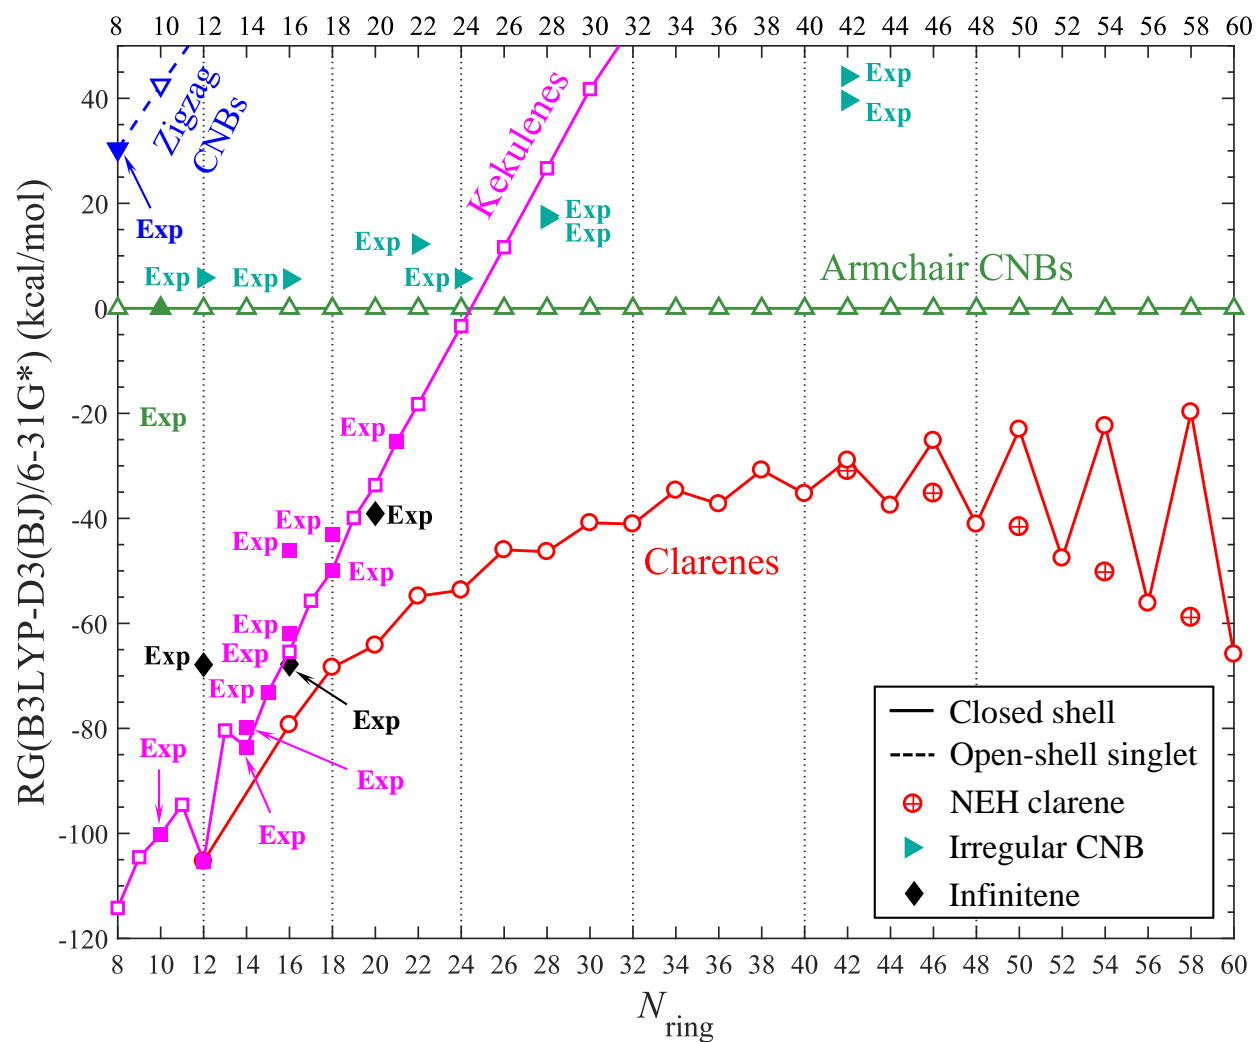

**Figure S4.** Idem Fig. S3 for relative Gibbs free energies at 298.15 K and 1 atm, calculated at the B3LYP-D3(BJ)/6-31G\* level.

## 4 Simulated $^1\text{H}$ NMR spectra of kekulenes and clarenes

$^1\text{H}$  NMR spectrum for synthesized [12]kekulene, [2,2,2,2,2,2],<sup>5-8</sup> was simulated in 1,2,4,5-tetrachlorobenzene solvent with SMD model at the GIAO-DFT level. As shown in Fig. S5, the simulated result is in good agreement with the experimental one. Obviously, there are three groups of peaks corresponding to three types of H atoms in both kekulene and clarene structures.

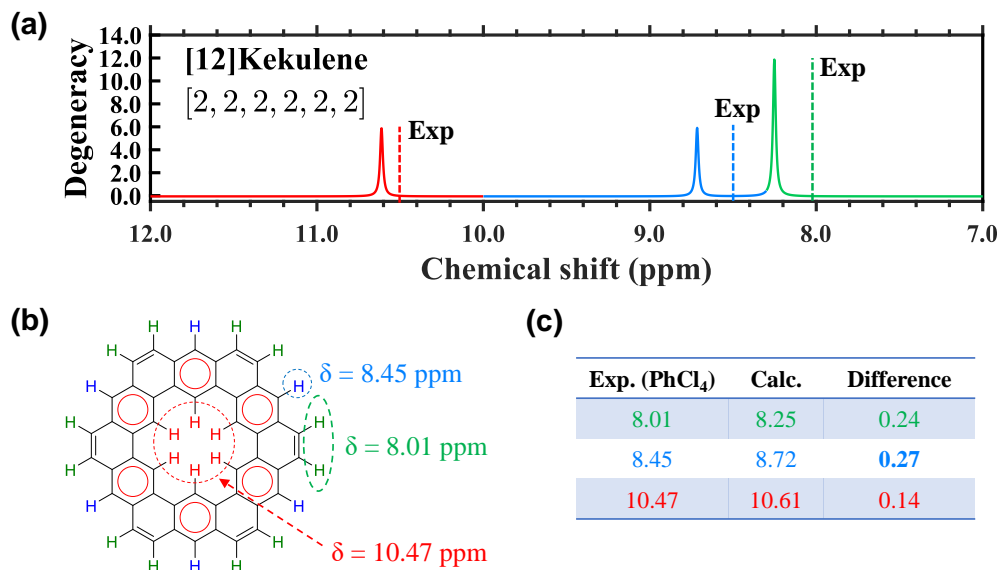

**Figure S5.**  $^1\text{H}$  NMR spectrum for the synthesized [12]kekulene. (a) Simulated  $^1\text{H}$  NMR chemical shift for [12]kekulene in 1,2,4,5-tetrachlorobenzene at the GIAO-DFT (B3LYP/6-311+G(2d,p)(PhCl<sub>4</sub>-SMD)// $\omega$ B97XD/cc-pVDZ) level. Low-field, medium-field and high-field peaks are colored in red, blue and green, respectively. Experimental values are indicated by vertical lines. (b) Different types of H atoms are colored in red, blue and green, respectively, corresponding to peaks indicated by the same color in (a). (c) Comparison of chemical shifts between experimental measurements and our calculations.

In the following, we present in Fig. S6–S12 the simulated  $^1\text{H}$  NMR spectra for the lowest-energy isomers of kekulenes and clarenes of varying sizes (with 8 to 60 benzene rings). In each spectrum, the  $^1\text{H}$  NMR peaks shown in distinct colors originate from the H atoms in the illustrated structure on the left, which are highlighted in the same color. The rings are colored in orange and light yellow represent sextets and migrated sextets, respectively. For [8]kekulene (see Fig. S6(a)), H atoms colored in red fall in high-field regions which is obviously different from other kekulenes. The reason is that [8]kekulene has a non-planar structure, and the H atoms colored in red fall into the shielding regions of the benzene rings on the opposite side.

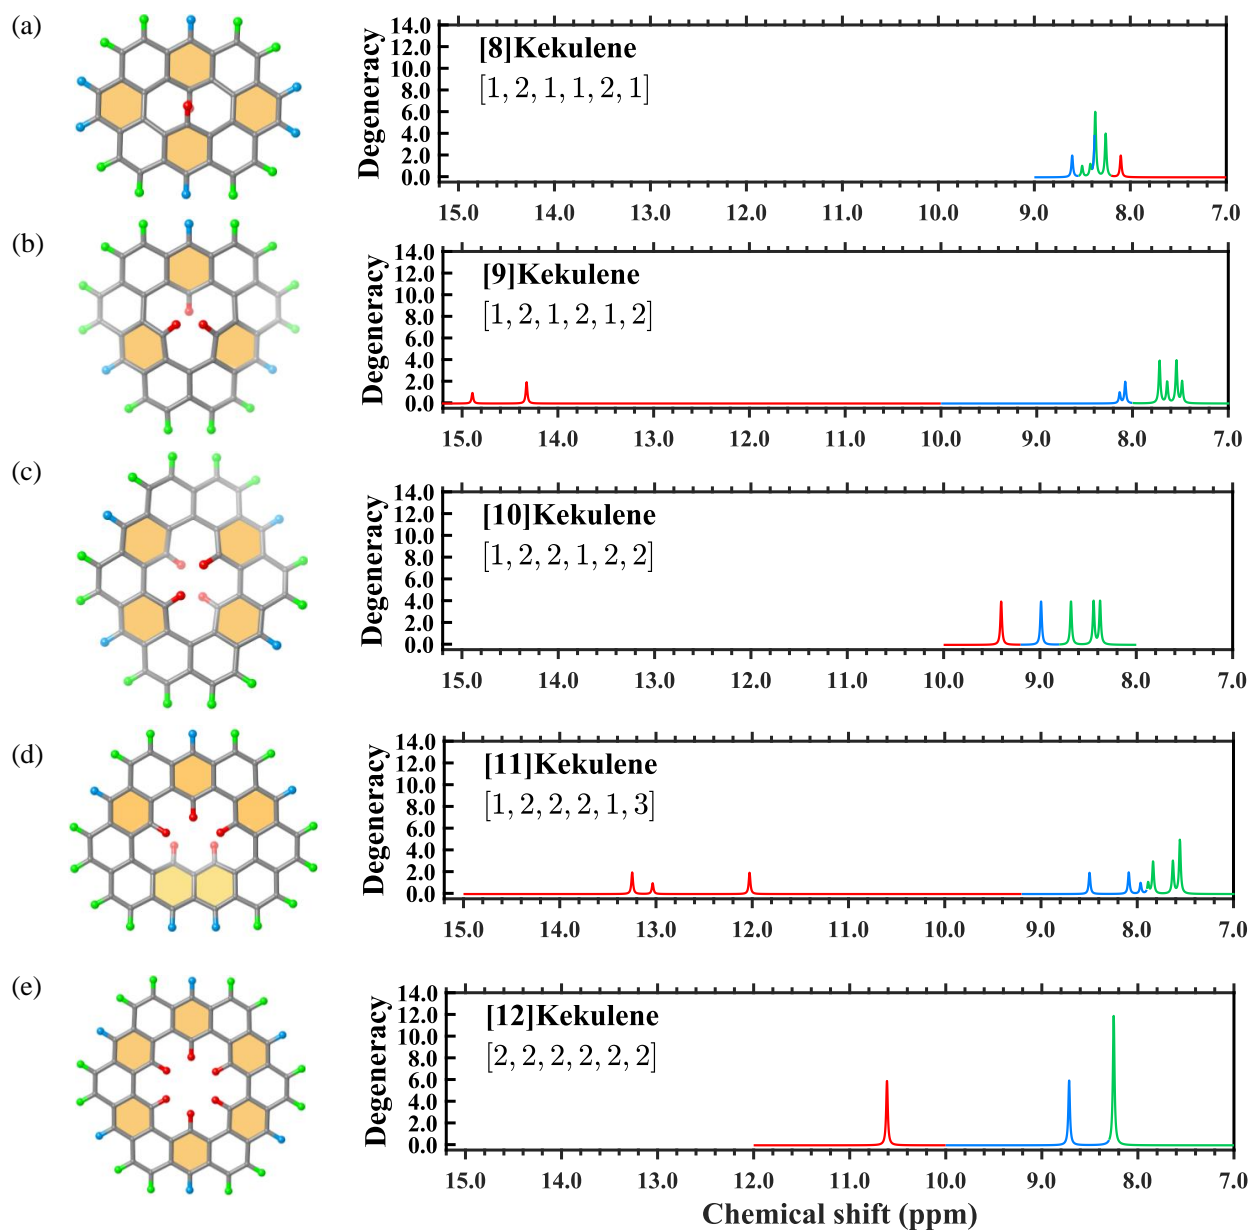

**Figure S6.** Simulated  $^1\text{H}$  NMR spectra for the lowest-energy isomers of kekulenes containing 8 to 12 rings in  $\text{PHCl}_4$  solvent. NMR peaks in different colors originate from the corresponding H atoms in the illustrated structure on the left, which are highlighted in the same color. The rings are colored in orange and light yellow represent sextets and migrating sextets, respectively.



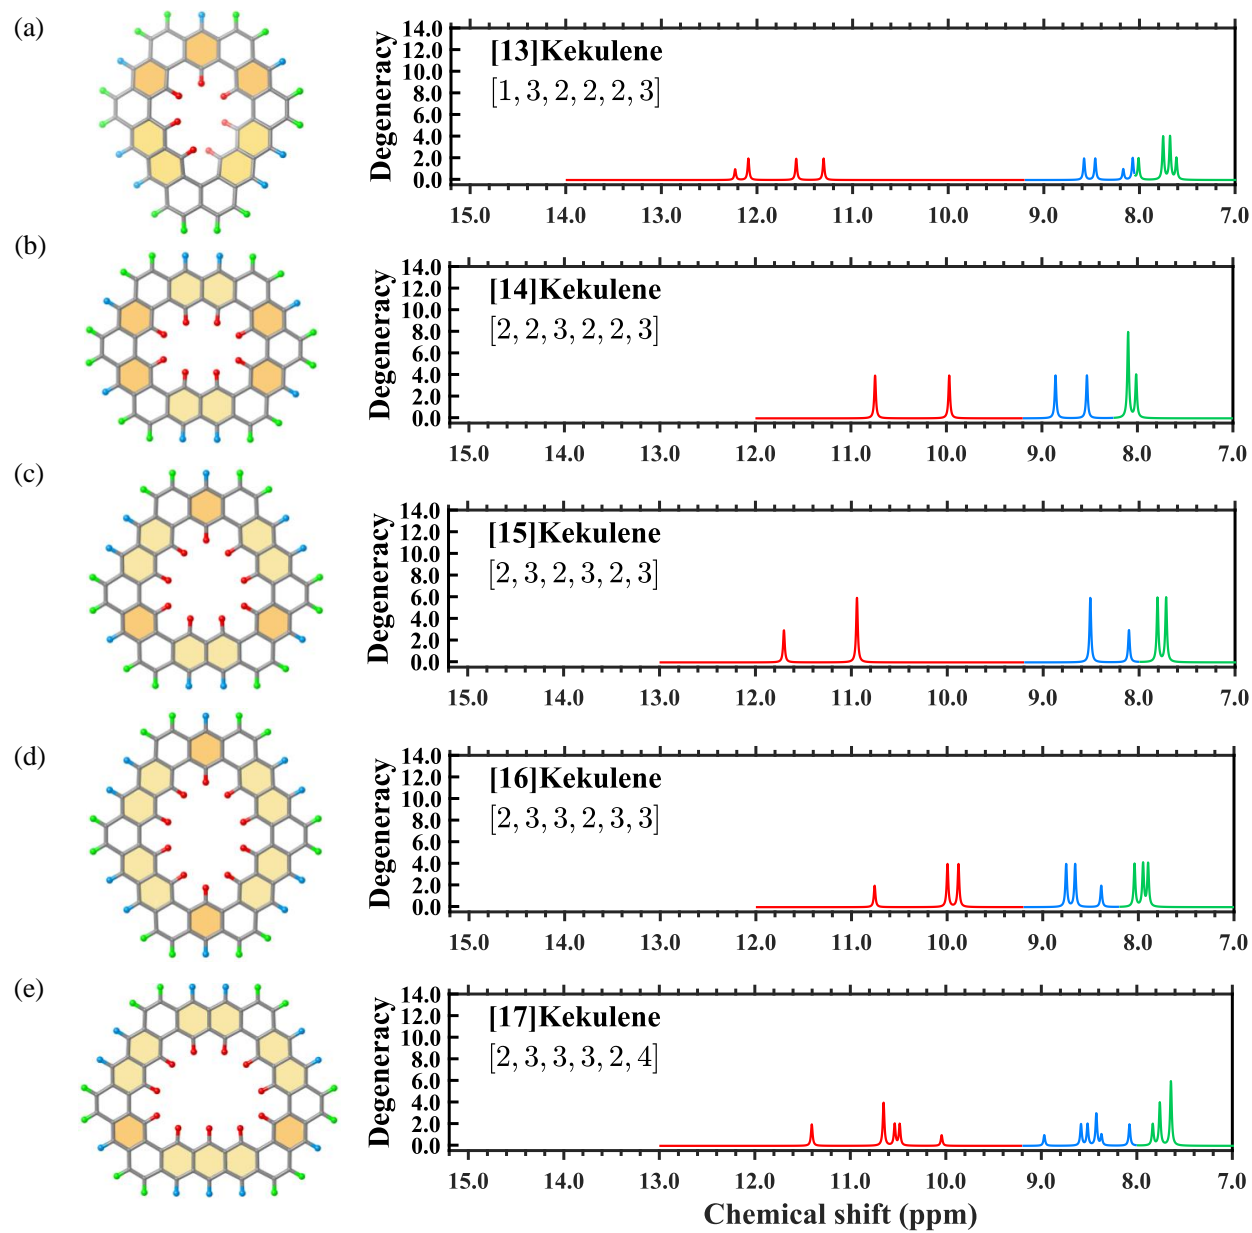

**Figure S7.** Idem Fig. S6 for the lowest-energy isomers of kekulenes containing 13 to 17 rings.

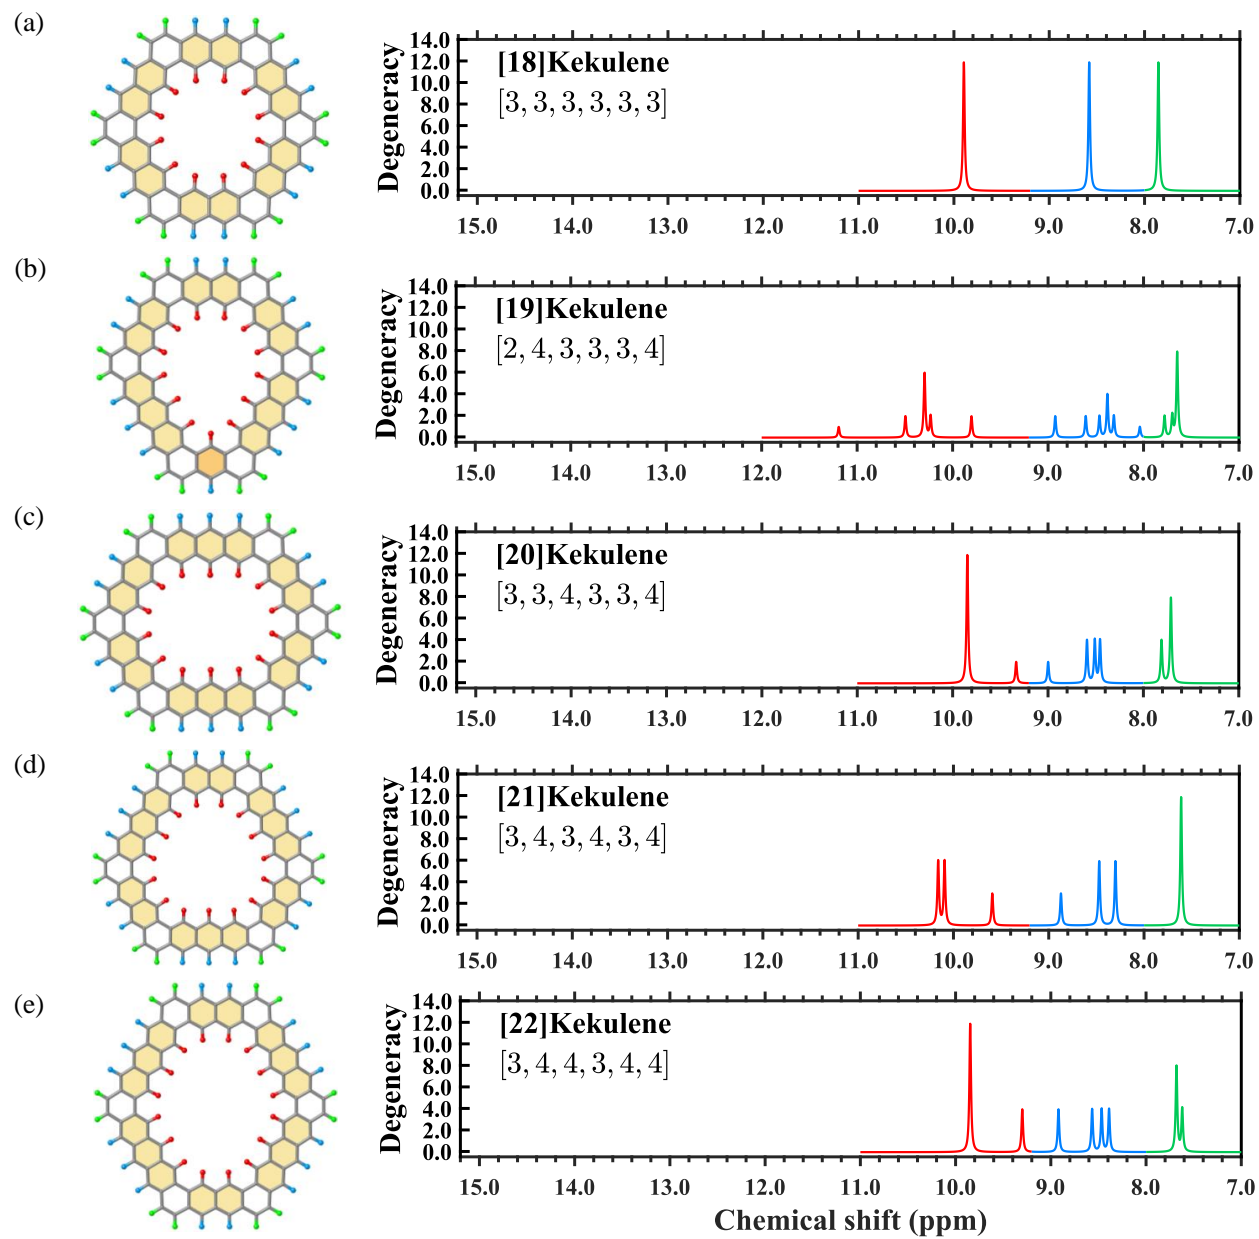

**Figure S8.** Idem Fig. S6 for the lowest-energy isomers of kekulenes containing 18 to 22 rings.

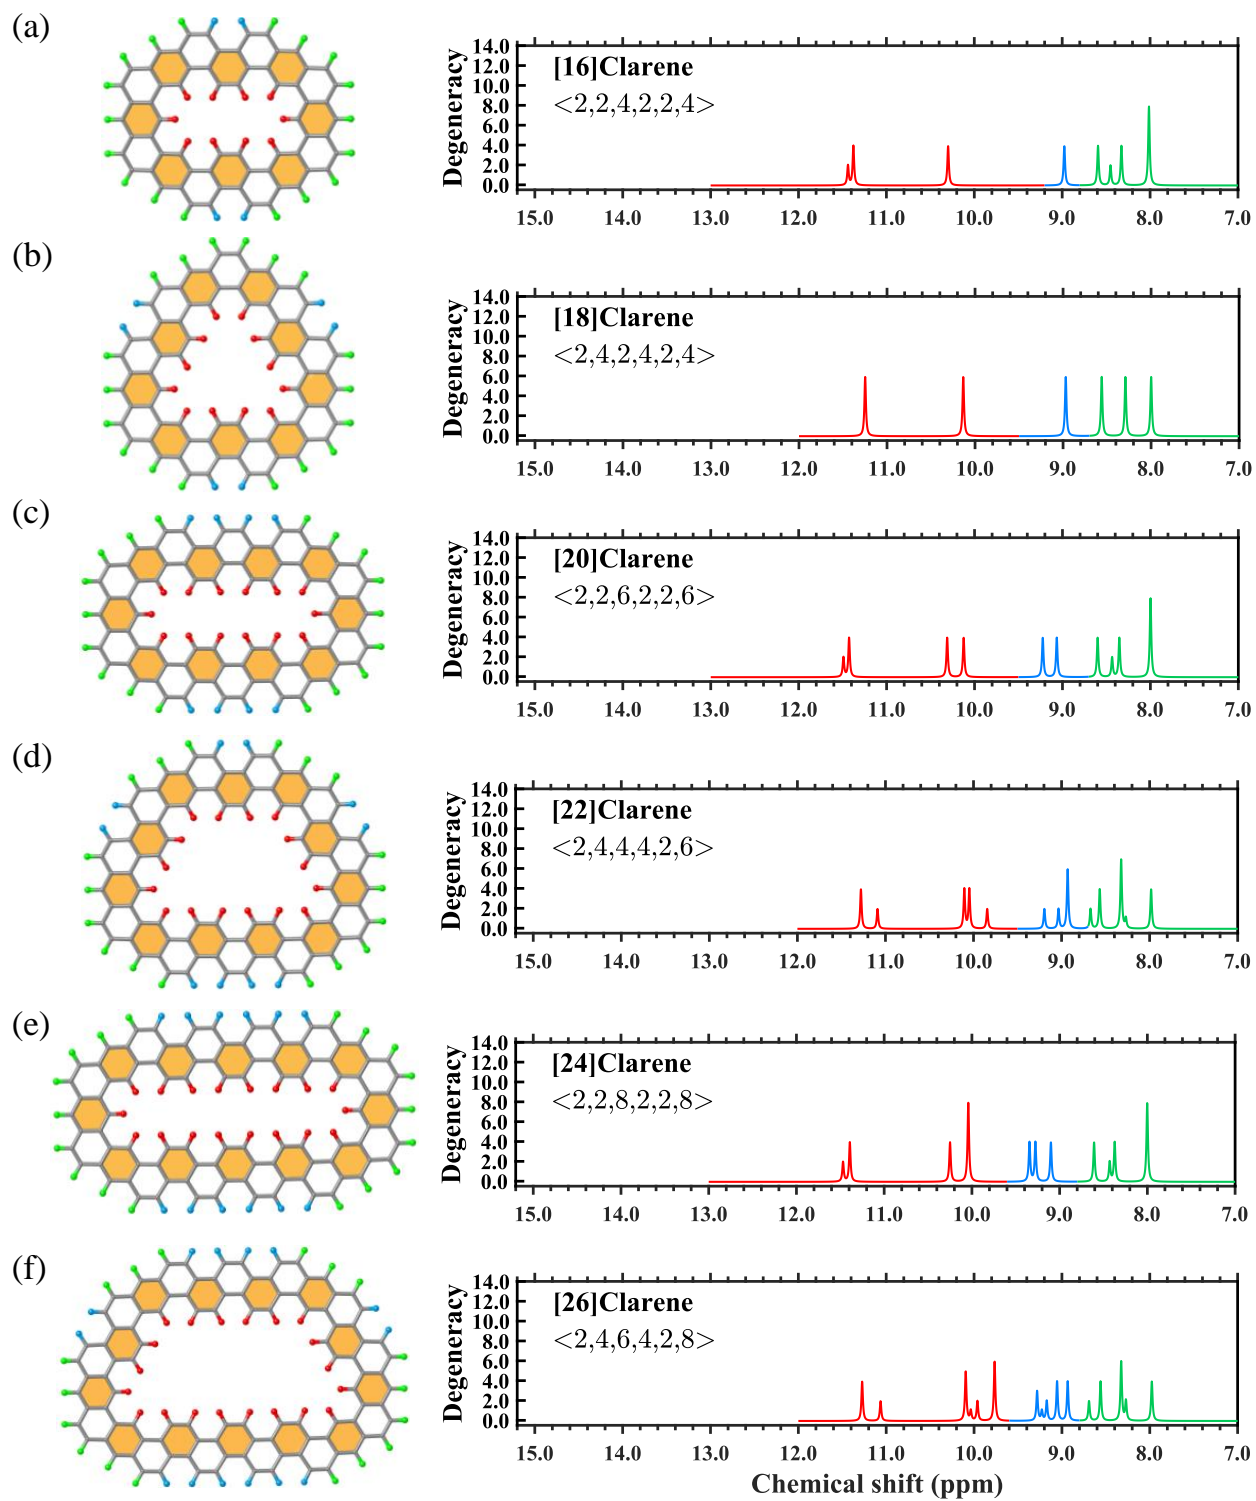

Figure S9. Idem Fig. S6 for the lowest-energy isomers of clarenes containing 18 to 26 rings.

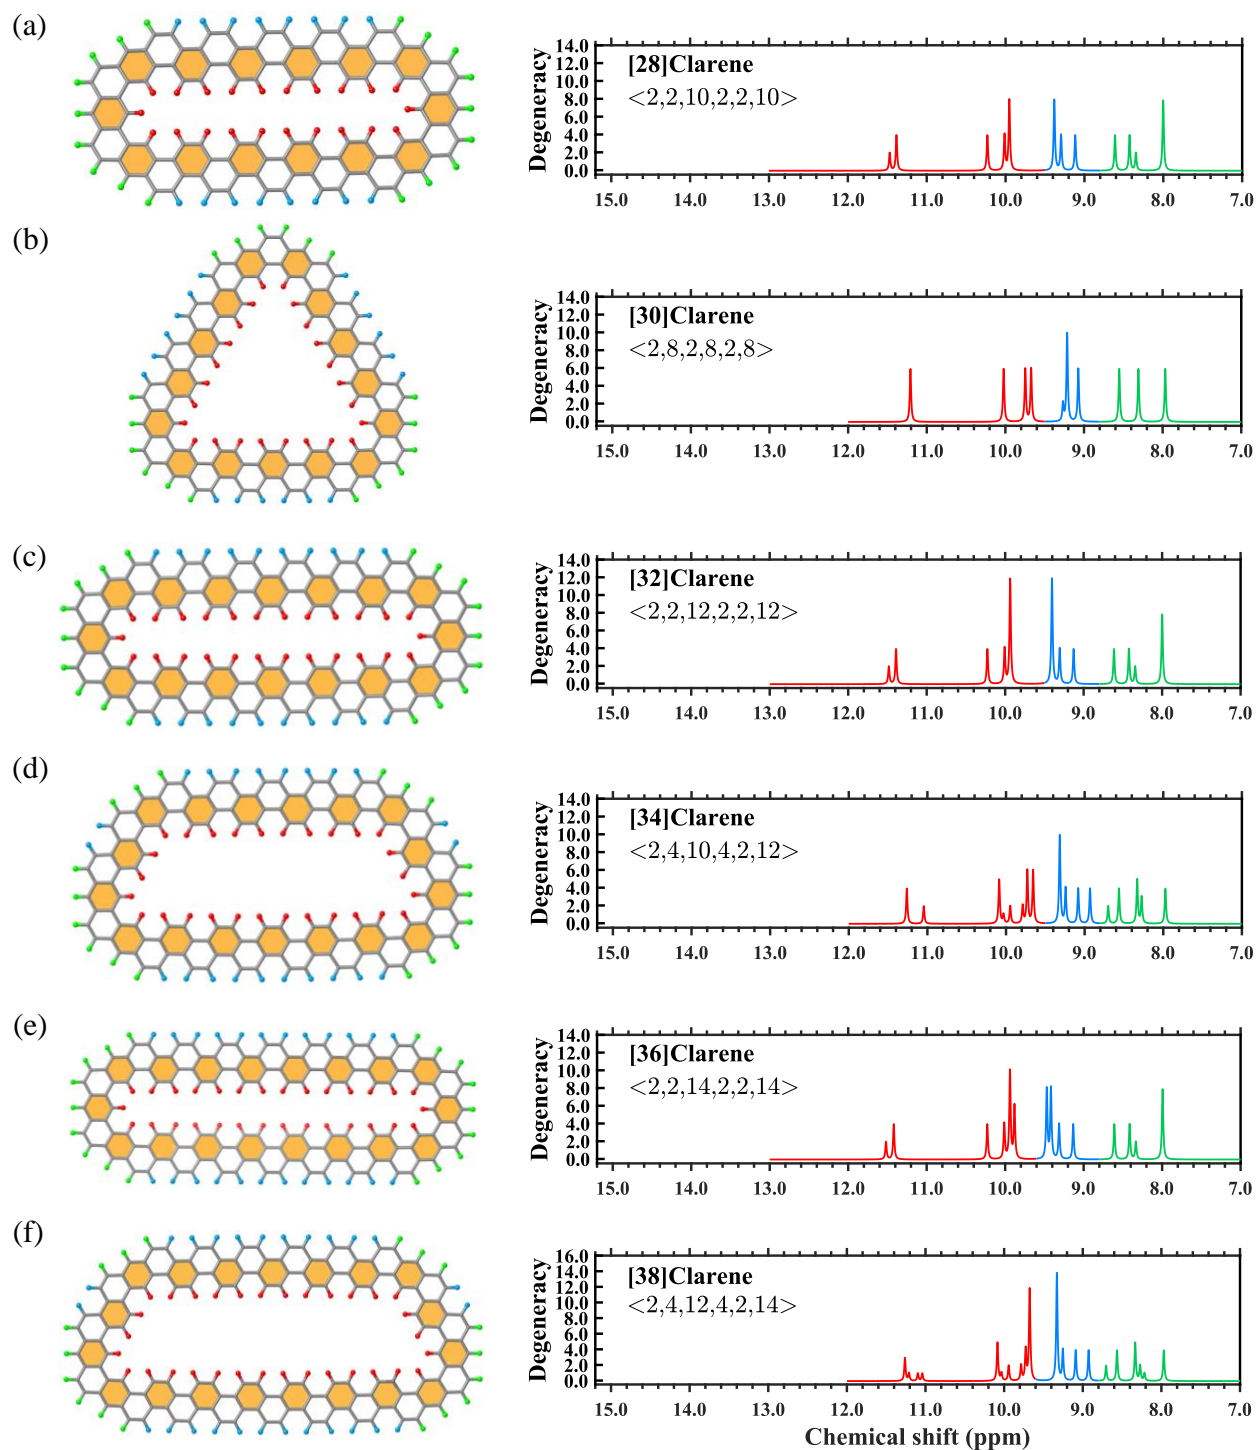

**Figure S10.** Idem Fig. S6 for the lowest-energy isomers of clarenes containing 28 to 38 rings.

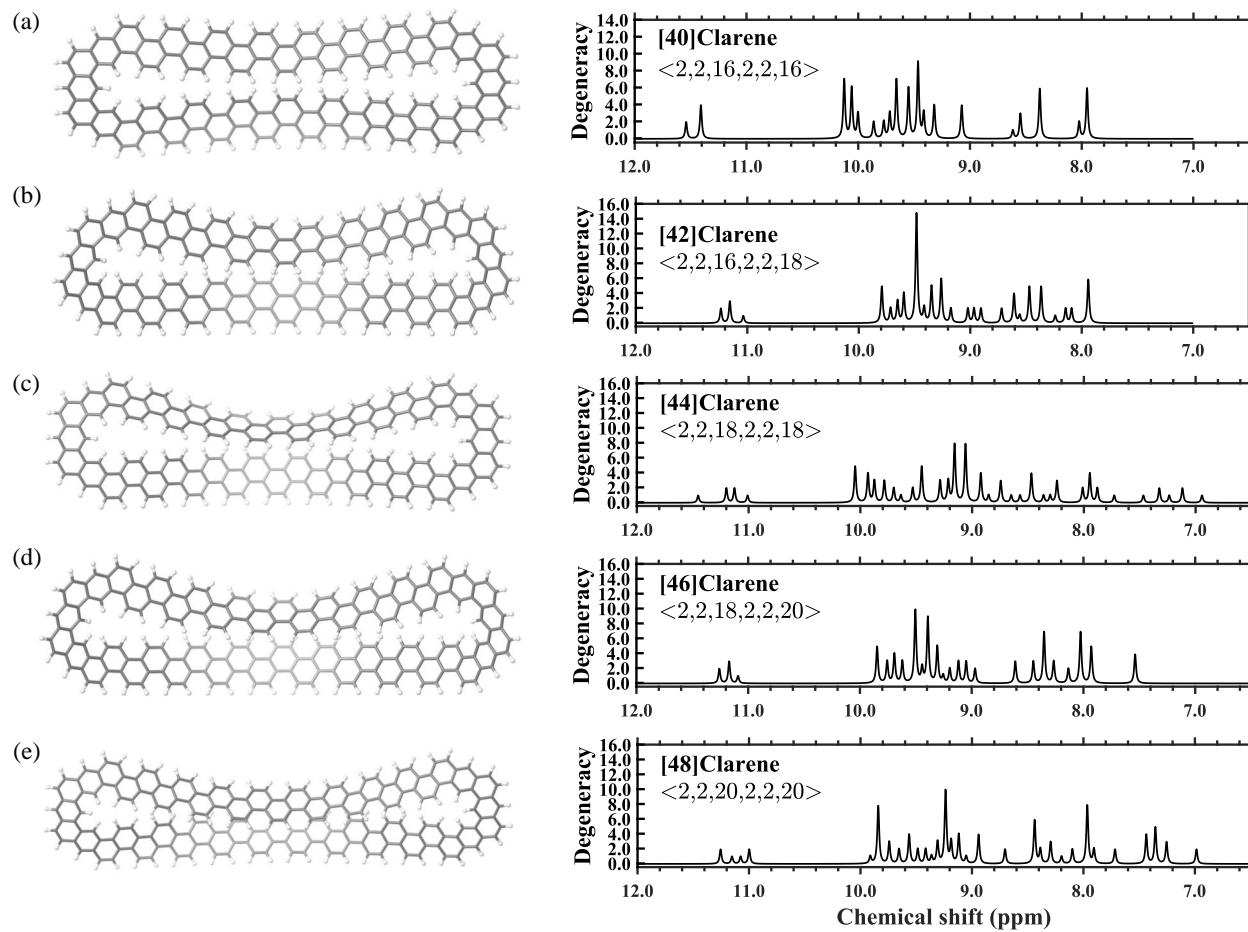

**Figure S11.** Simulated  $^1\text{H}$  NMR spectra for the lowest-energy isomers of clarenes containing 40 to 48 rings.

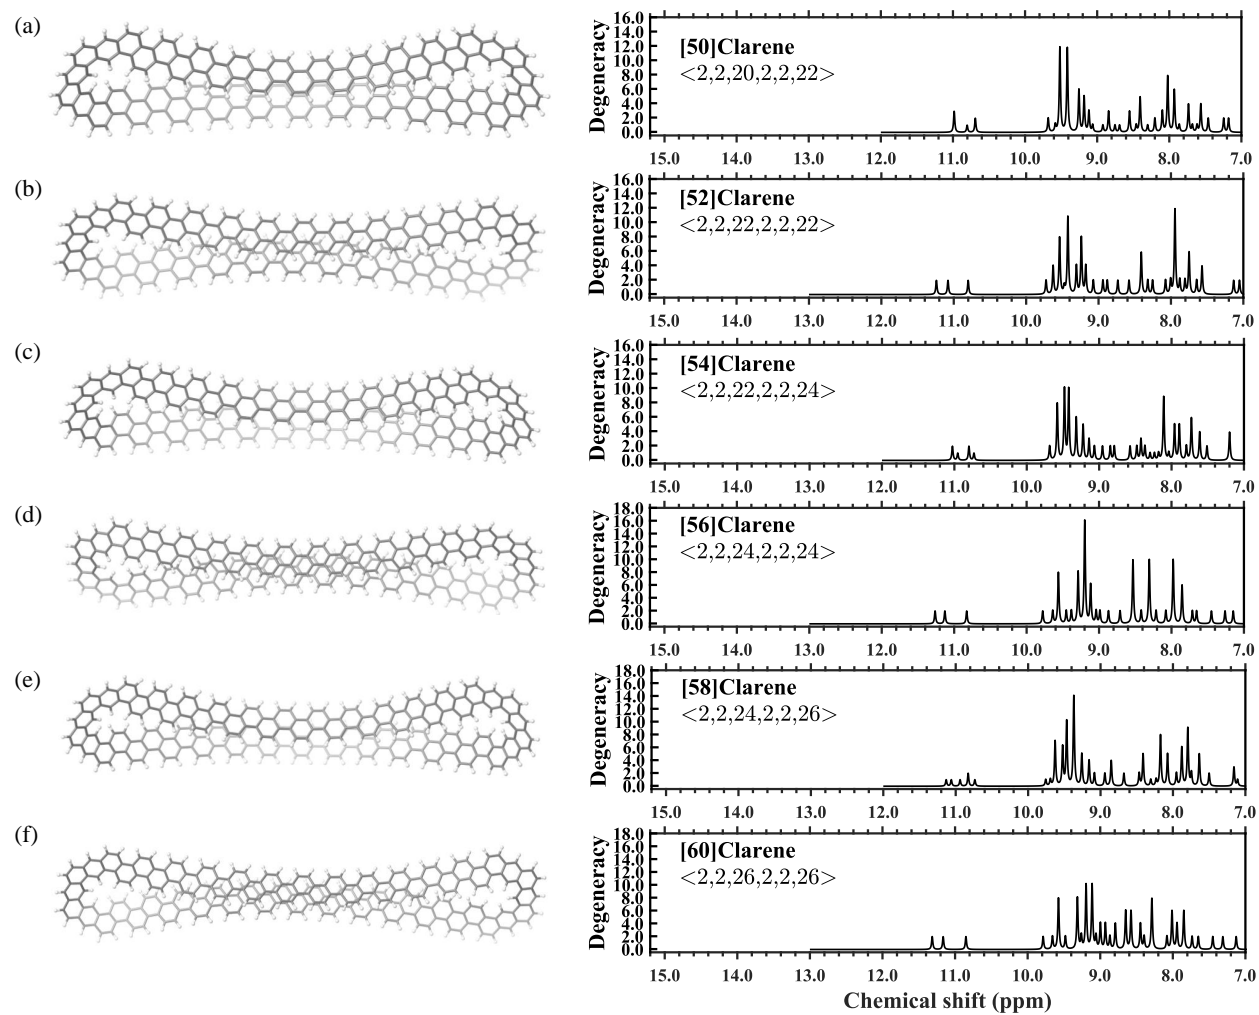

**Figure S12.** Idem Fig. S11 for the lowest-energy isomers of clarenes containing 50 to 60 rings.

## 5 Simulated UV-vis spectra of kekulenes and clarenes

We performed TD DFT calculations at the B3P86/6-311G(d,p)// $\omega$ B97XD/cc-pVDZ level to simulate the UV-vis absorption for the lowest-energy isomers of kekulenes and clarenes from 8 to 60 rings (see Fig. S15-S19). We also tried a larger basis set, 6-311++G(2d,p), but the results did not improve significantly. From the assessment for [12]kekulene and [16]clarene, we can see that the 6-311G(d,p) basis set results in a UV-vis spectrum very similar to that given by the 6-311++G(2d,p) basis set, as shown in Fig. S13, indicating that the 6-311G(d,p) is sufficient to describe the considered compounds.

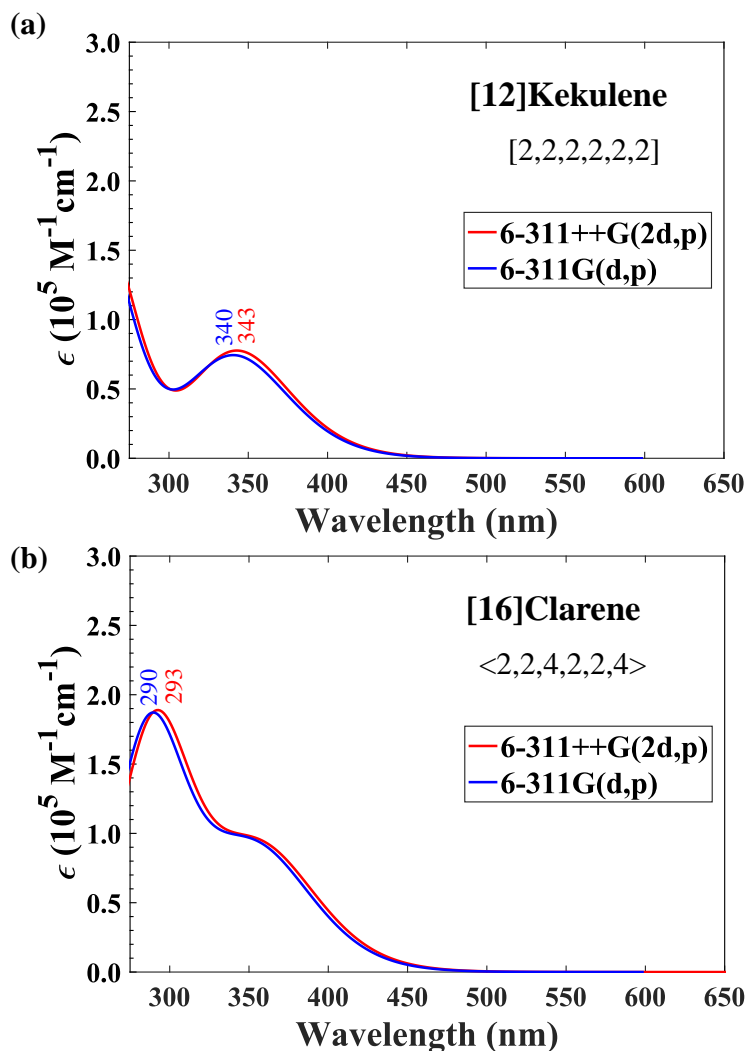

**Figure S13.** Comparison of the UV-vis absorption spectra simulated with basis sets 6-311++G(2d,p) and 6-311G(d,p) for (a) the experimentally synthesized [12]kekulene and (b) the lowest-energy isomer of [16]clarene.

We also simulate UV-vis absorption spectra for the experimentally synthesized [12]kekulene in order to verify the feasibility of the method. As shown in Fig. S14, simulated spectrum is in reasonable agreement with the experimental one,<sup>13</sup> in terms of prediction of maximum absorption peak wavelength (340 nm vs. 327 nm).

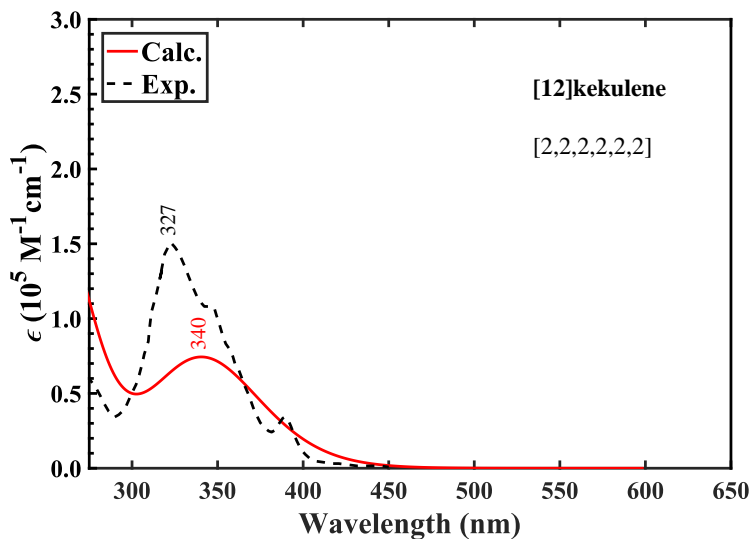

**Figure S14.** Comparison of the UV-vis spectra between experiment and calculation for experimentally synthesized [12]kekulene.<sup>5-8,13</sup>



In the following, we present in Fig. S15-S19 the simulated UV-vis absorption spectra for the lowest-energy isomers of kekulenes and clarenes of varying sizes (with 8 to 60 benzene rings).

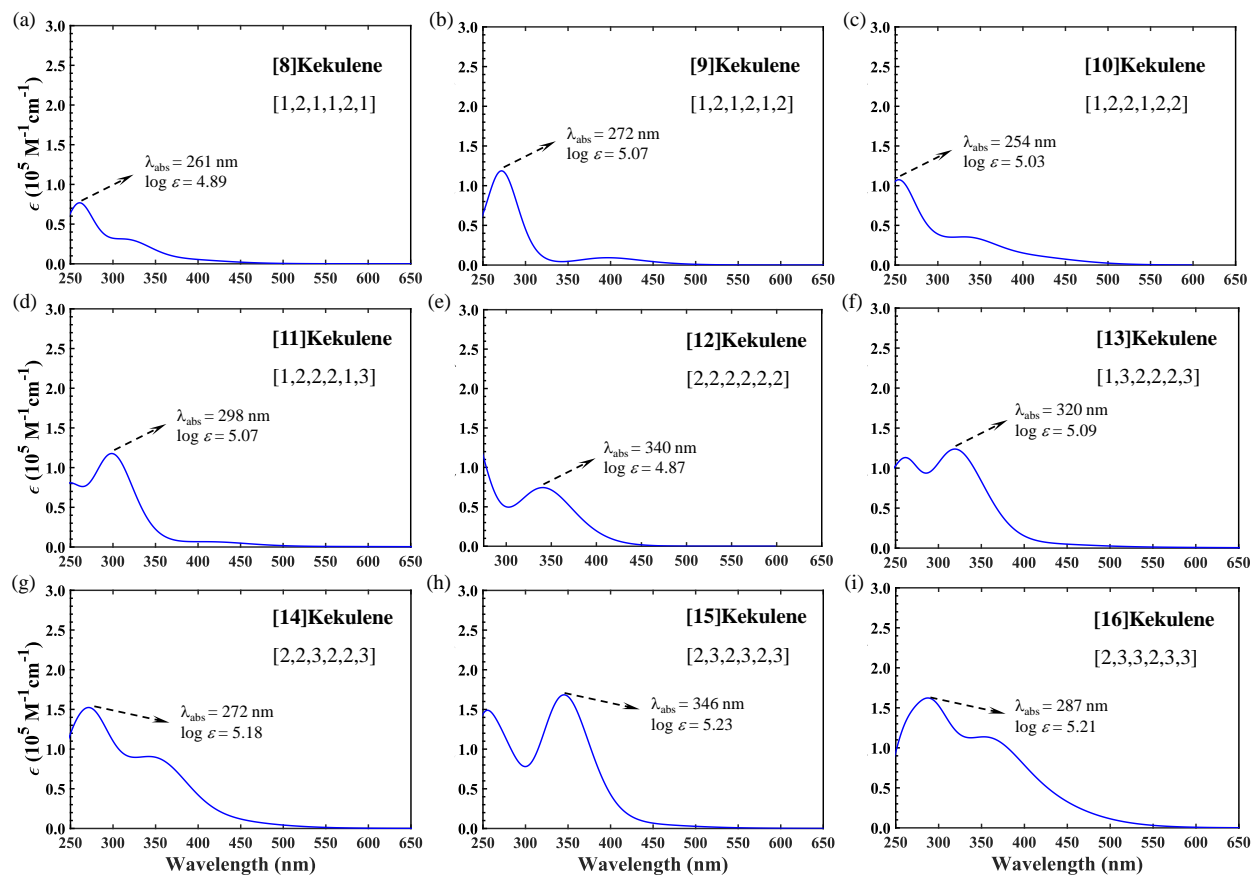

**Figure S15.** Simulated UV-vis spectra for lowest-energy isomers of kekulenes containing 8 to 16 rings

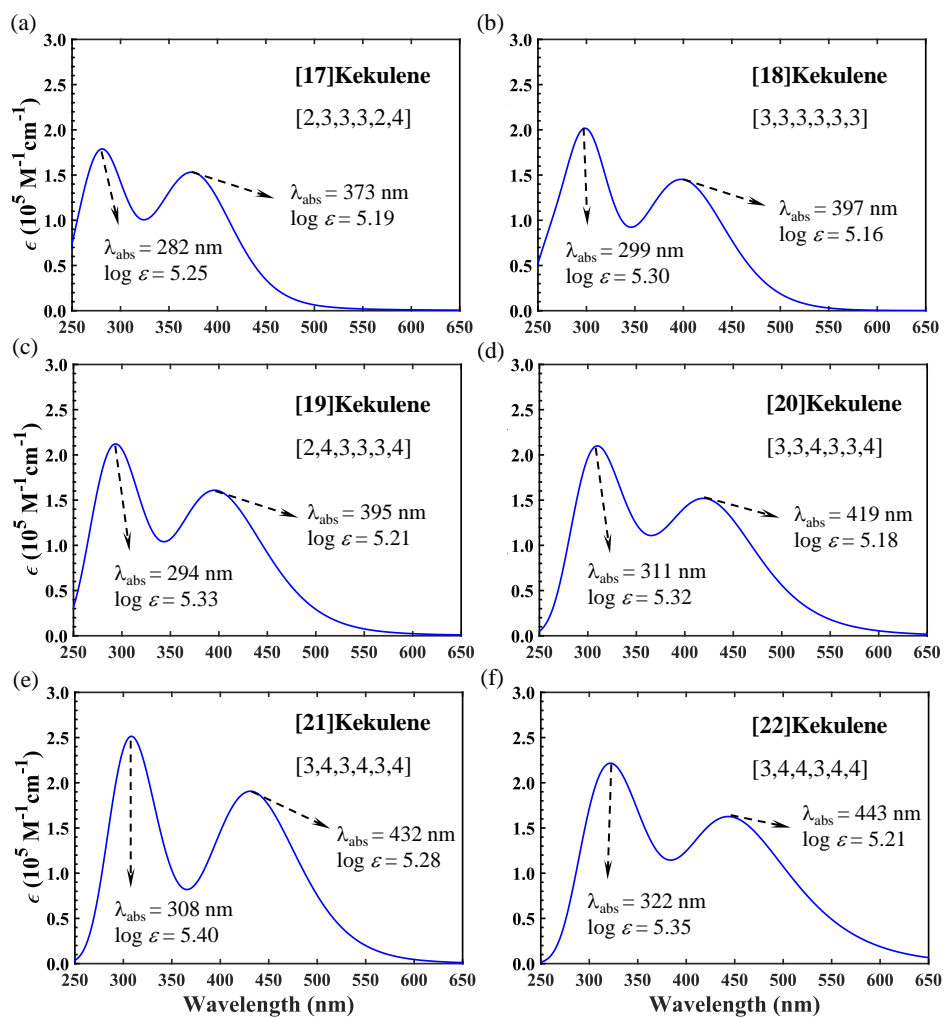

**Figure S16.** Idem Fig. S15 for the lowest-energy isomers of kekulenes containing 17 to 22 rings.

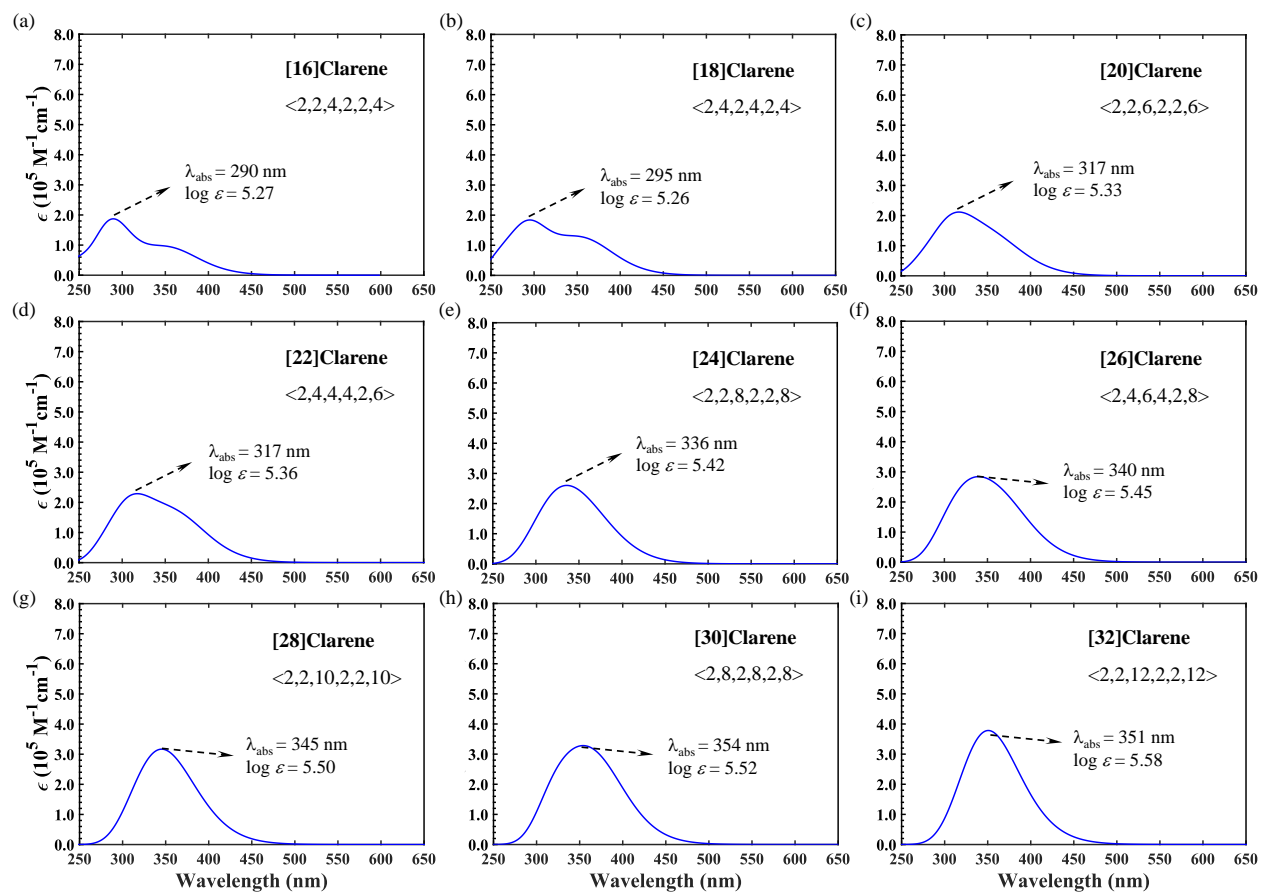

**Figure S17.** Idem Fig. S15 for the lowest-energy isomers of clarenes containing 16 to 32 rings.

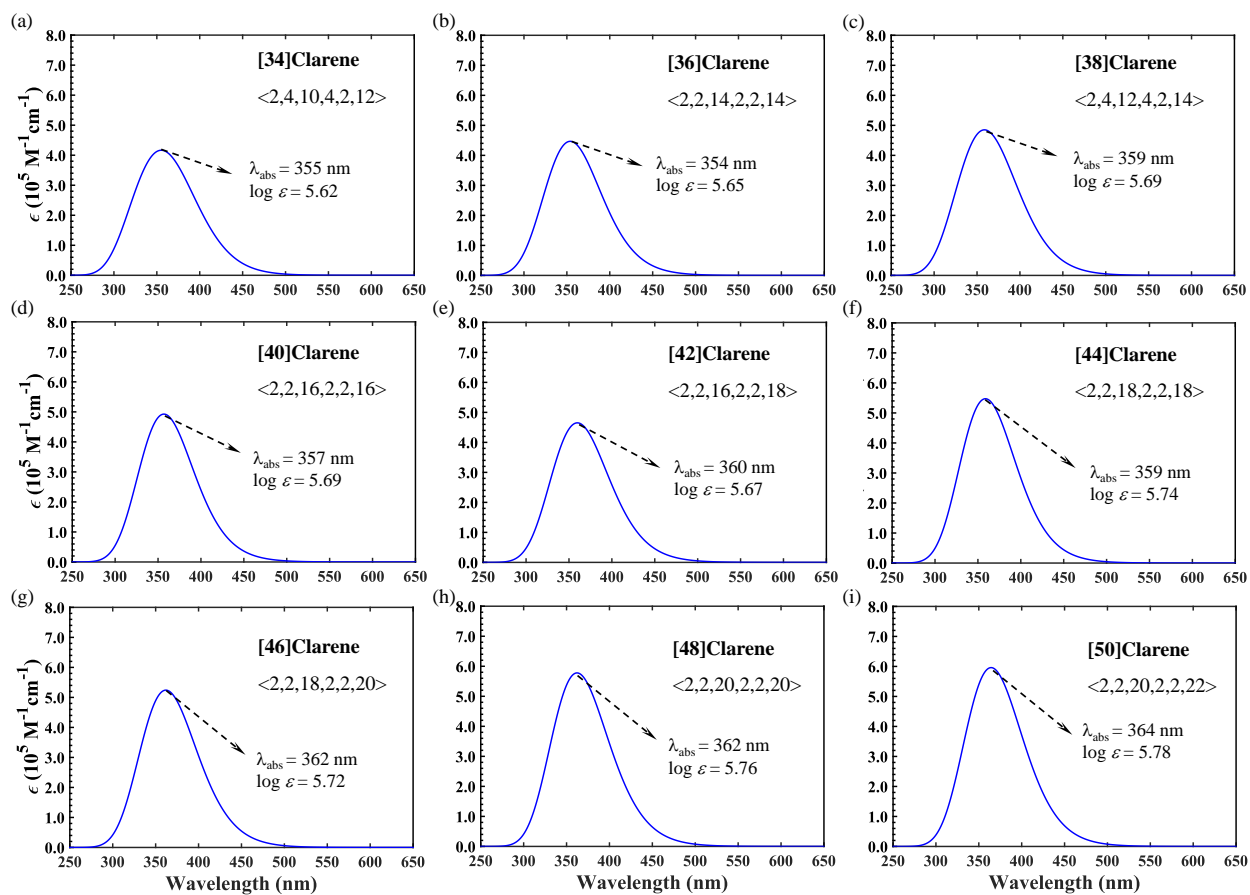

**Figure S18.** Idem Fig. S15 for the lowest-energy isomers of clarenes containing 34 to 50 rings.

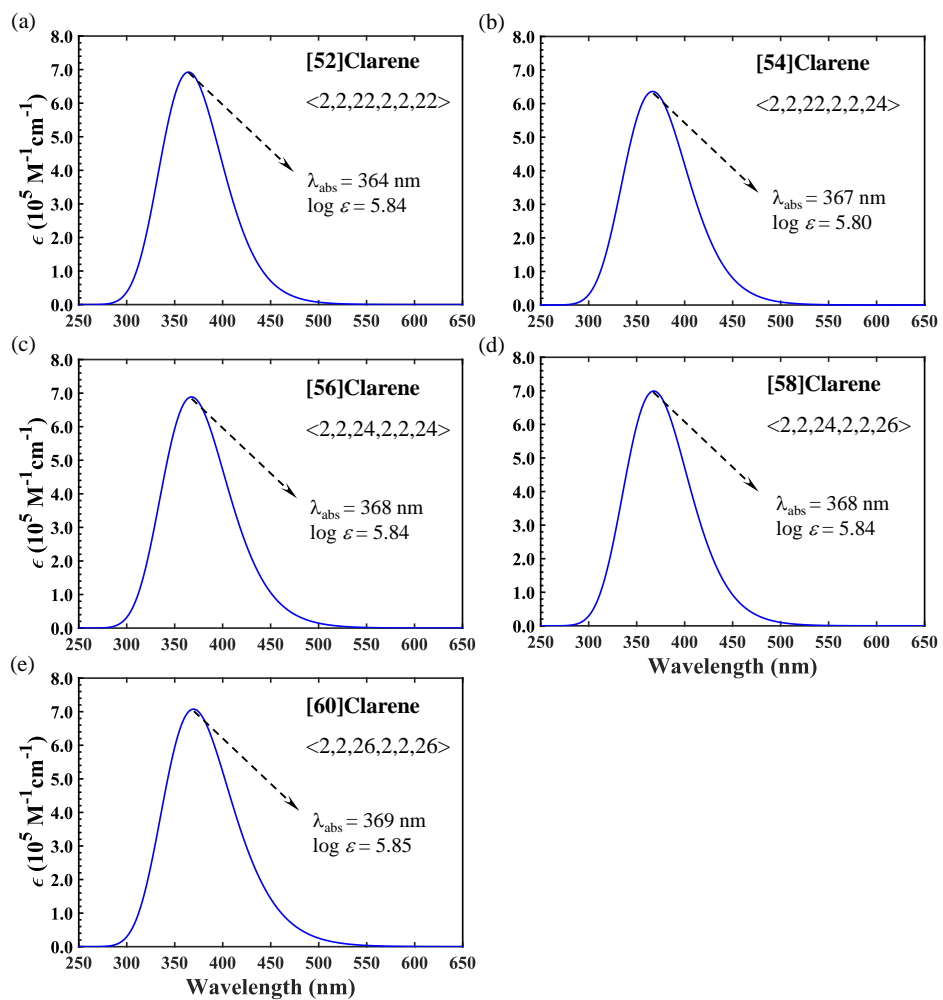

**Figure S19.** Idem Fig. S15 for the lowest-energy isomers of clarenes containing 52 to 60 rings.

As shown in Fig. S20, the molar extinction coefficients ( $\epsilon$ ) gradually increases as the increasing of molecular size, which is caused by the increase of transition probability as a result of the increasing the number of frontier molecular orbitals as the  $\pi$ -conjugated system grows.

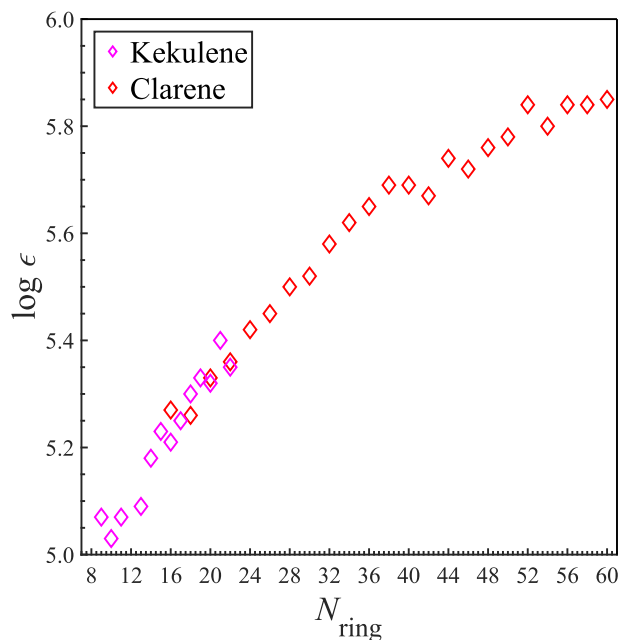

**Figure S20.** The molar extinction coefficients,  $\log \epsilon$ , of kekulenes and clarenes, versus the number of rings,  $N_{\text{ring}}$ .

## 6 Details on the construction of equiangular hexagons

Equiangular hexagons<sup>14</sup> can be constructed from the intersection between two appropriate equilateral triangles with the side lengths of  $a_0$  and  $a_1$ , as shown in Fig. S21(a). Without losing generality, let  $a_0 \geq a_1$ . Obviously, the smaller triangle cannot be too small to ensure the intersection of the two triangles to form a hexagon. The extreme case is that the smaller triangle is inscribed in the larger one, in which  $a_1 = a_0/2$  (see the Fig. S21(c)).

As we can see, the equiangular hexagon can be obtained by the intersection of the two equilateral triangles, as shown by the green lines in Fig. S21(b), where the side lengths of the equiangular hexagon,  $h_1, h_2, h_3, h_4, h_5$ , and  $h_6$ , are all positive integers. Evidently,

$$\begin{cases} a_0 = h_6 + h_1 + h_2 = h_2 + h_3 + h_4 = h_4 + h_5 + h_6 \\ a_1 = h_1 + h_2 + h_3 = h_3 + h_4 + h_5 = h_5 + h_6 + h_1 \\ a_0 + a_1 = h_1 + h_2 + h_3 + h_4 + h_5 + h_6 = L \end{cases} \quad (\text{S1})$$

where  $L$  is the integer perimeter of the given equiangular hexagon. Since  $h_1, h_2, h_3, h_4, h_5$ , and  $h_6$ , are all positive integers, according to Eq. (S1), both  $a_0$  and  $a_1$  are positive integers as well.

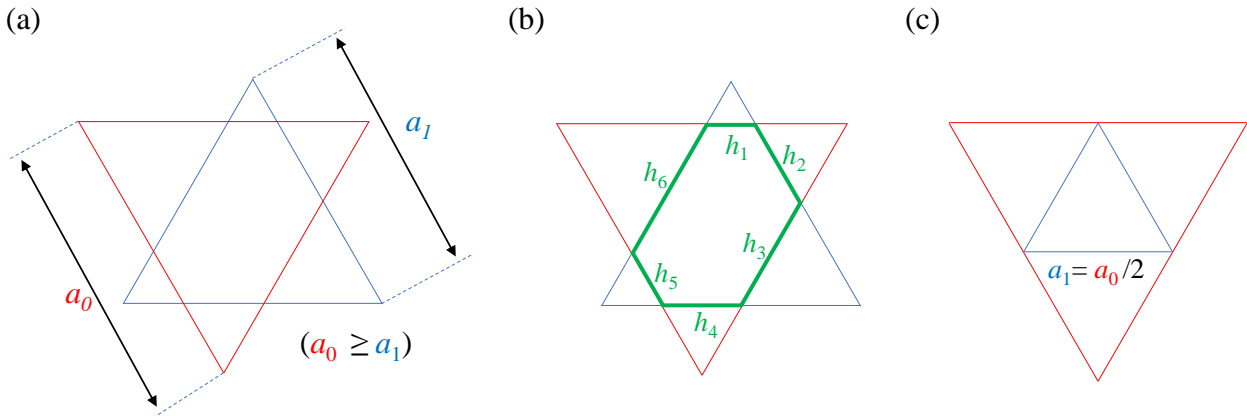

**Figure S21.** Schematic diagram of the construction of equiangular hexagon. (a) Equiangular hexagons constructed from the intersection between two appropriate equilateral triangles with the side lengths of  $a_0$  and  $a_1$  (let  $a_0 \geq a_1$ ). (b) Equiangular hexagon surrounded by green lines indicates the superhexagon formed by benzene rings, the side lengths of which ( $h_1, h_2, h_3, h_4, h_5$ , and  $h_6$ ) define the structural notation of a kekulene or a clarene. (c) Limit for the side lengths of equilateral triangles to ensure a valid equiangular hexagon. Equiangular hexagon can not be constructed when  $a_1$  is less than or equal to half of  $a_0$ .

To sum up, the side lengths of the two equilateral triangles have the following constraint.

$$\begin{cases} a_0/2 < a_1 \leq a_0 \\ a_0 + a_1 = L \\ a_0, a_1 \in \mathbb{Z}^+ \end{cases} \quad (\text{S2})$$

Next, we determine the value of the side lengths of the equiangular hexagon,  $h_1, h_2, h_3, h_4, h_5,$  and  $h_6$ , which can be achieved by the following steps.

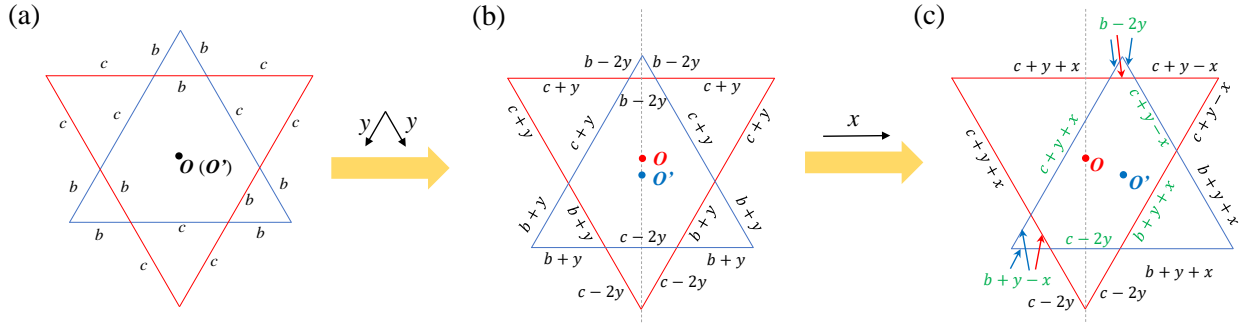

**Figure S22.** Construction steps of equiangular hexagons of any shape. (a) Two equiangular triangles with their centers,  $O$  and  $O'$ , coincide each other. (b) Slide the smaller triangle vertically by amount of  $y$  ( $y > 0$  for downward slide and  $y < 0$  for upward slide). (c) Slide the smaller triangle horizontally to the right by amount of  $x$  (let  $x \geq 0$ ).

Step 1: Place the two equiangular triangles in such a way that their centers,  $O$  and  $O'$ , coincide each other, as shown in Fig. S22(a). As we can see:

$$\begin{cases} b + 2c = a_0 \\ 2b + c = a_1 \end{cases} \quad (\text{S3})$$

And then we can deduce the value of  $b$ , and  $c$ ,

$$\begin{cases} b = \frac{2a_1 - a_0}{3} \\ c = \frac{2a_0 - a_1}{3} \end{cases} \quad (\text{S4})$$

Since  $a_0 \geq a_1$ , it is easy to show that  $b \leq c$ . As  $a_0$  and  $a_1$  are positive integers, both  $b$  and  $c$  are positive multiples of  $1/3$ .

Step 2: Slide the smaller triangle vertically by amount of  $y$  ( $y > 0$  for downward slide and  $y < 0$  for upward slide), as shown in the Fig. S22(b). We can see that the downward



slide ( $y > 0$ ) and the upward slide ( $y < 0$ ) give rise to different results. So,  $y$  can be positive, negative or zero.

Step 3: Slide the smaller triangle horizontally to the right by amount of  $x$ , as shown by the Fig. S22(c). Because of bilateral symmetry, the rightward slide and the leftward slide by the same amount lead to equivalent results. Hence, we only need to consider the case with  $x \geq 0$ .

As a result, the six side lengths of the equiangular hexagon are:

$$\begin{cases} h_1 = b - 2y \\ h_2 = c - x + y \\ h_3 = b + x + y \\ h_4 = c - 2y \\ h_5 = b - x + y \\ h_6 = c + x + y \end{cases} \quad (\text{S5})$$

We can quickly check that:  $L = (b - 2y) + (c + y - x) + (b + y + x) + (c - 2y) + (b + y - x) + (c + y + x) = 3(b + c)$ . Plugging Eq. (S4) into this equation, we verify that  $L = (2a_1 - a_0) + (2a_0 - a_1) = a_0 + a_1$ .

The parameters  $b, c, x$  and  $y$  in Eq. (S5) are subject to some constraints, which can be worked out as follows.

From  $a_0 + a_1 = L$  and  $a_0/2 < a_1 \leq a_0$ , we have

$$\frac{L}{2} < a_0 \leq \frac{2L}{3} \quad (\text{S6})$$

As  $h_1 = b - 2y \geq 1$ , it follows that  $y \leq (b - 1)/2$ . As  $h_5 = b - x + y \geq 1$ , then  $x \leq b + y - 1$ . Thereby, we also have that  $y \geq x - b + 1 \geq -b + 1$  (since  $x$  is nonnegative as mentioned before). Therefore,  $x$  and  $y$  are subject to the following constraints:

$$\begin{cases} -(b - 1) \leq y \leq \frac{b - 1}{2} \\ 0 \leq x \leq b + y - 1 \end{cases} \quad (\text{S7})$$

Note that just as the values of  $b, c$  are multiples of  $1/3$ , the values of  $y$  are multiples of  $1/6$  since the upper boundary of  $y$  is  $(b - 1)/2$ . Likewise,  $x$  values are also multiples of  $1/6$ . We should also be aware that the minimum value of  $y$  is exactly  $-(b - 1)$  when  $x = 0$  and  $h_5 = 1$ , while the maximum value of  $y$  is exactly  $(b - 1)/2$  when  $h_1 = 1$ . By varying continually  $y$  value from  $-(b - 1)$  to  $(b - 1)/2$ , we obtain a series of side lengths of the hexagon,  $h_1, h_2, h_3,$

$h_4$ ,  $h_5$ , and  $h_6$ , which are all integers. Therefore, the variation stepsize of  $y$  value between  $-(b-1)$  and  $(b-1)/2$  must be an integer, otherwise  $h_5$  and  $h_1$  are not integer numbers. That is to say, the valid  $y$  values are  $-(b-1), -(b-1)+1, -(b-1)+2, -(b-1)+3, \dots, (b-1)/2$ . For the same reason, the valid values for  $x$  are  $0, 1, 2, \dots, b+y-1$ .

Based on the above discussion, we can propose a simple algorithm for enumeration of all possible equiangular hexagons with a given integer perimeter, as follow:

1. Given an integer number,  $L$ , for the perimeter of equiangular hexagons, we choose all eligible values of  $a_0$  and  $a_1$ , as follows (Eq. (S6)):

$$\begin{cases} \frac{L}{2} < a_0 \leq \frac{2L}{3} & (a_0 \text{ being an integer}) \\ a_1 = L - a_0 \end{cases} \quad (\text{S8})$$

Once  $a_0$  and  $a_1$  are chosen, we then have the corresponding values of  $b$  and  $c$  (Eq. (S4)):

$$\begin{cases} b = \frac{2a_1 - a_0}{3} \\ c = \frac{2a_0 - a_1}{3} \end{cases} \quad (\text{S9})$$

2. For every selection of  $a_0$ ,  $a_1$ ,  $b$  and  $c$  values, we choose all eligible values of  $y$  by running over the following range (Eq. (S7)):

$$y = -(b-1), -(b-1)+1, -(b-1)+2, \dots, \frac{b-1}{2} \quad (\text{S10})$$

3. And for every selection of  $y$ , we choose all eligible values of  $x$  by running over the following range (Eq. (S7)):

$$x = 0, 1, 2, \dots, b+y-1 \quad (\text{S11})$$

4. For each selection of values of  $b$ ,  $c$ ,  $y$  and  $x$ , we obtain the side lengths of a possible equiangular hexagon using Eq. (S5)

5. From all equiangular hexagons generated using the above procedures, we remove the duplicate or symmetrically equivalent ones. Thus, all possible equiangular hexagons with a given perimeter of  $L$  is enumerated.

## 7 Simple HMO model for predicting relative energies of clarenes

Fig. S23-S24 show the good correlation between  $\pi$  energy predicted by HMO,  $E_{\text{HMO}}$  and the DFT relative energies of clarene isomers,  $\text{RE}_{\text{B3LYP}}$ .

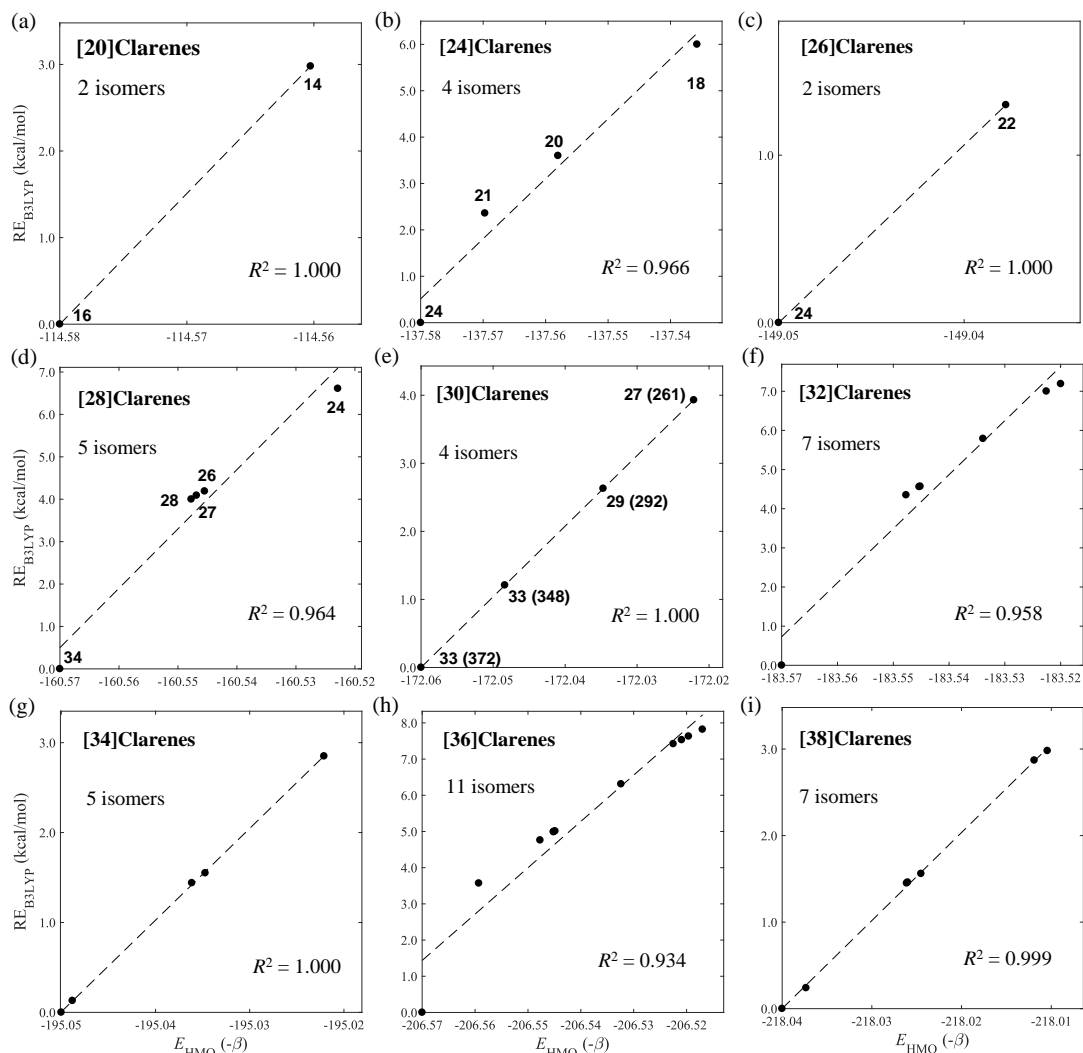

**Figure S23.** DFT relative energies,  $\text{RE}_{\text{B3LYP}}$ , versus HMO  $\pi$  energies,  $E_{\text{HMO}}$ , for (a) [20]clarenes, (b)-(i) [24]clarenes to [38]clarenes. In (a)–(e), the number of Clar resonators with the second largest number of sextets is represented by black bold numbers. In (e), the numbers in brackets indicate the number of Clar resonators with the third largest number of sextets.

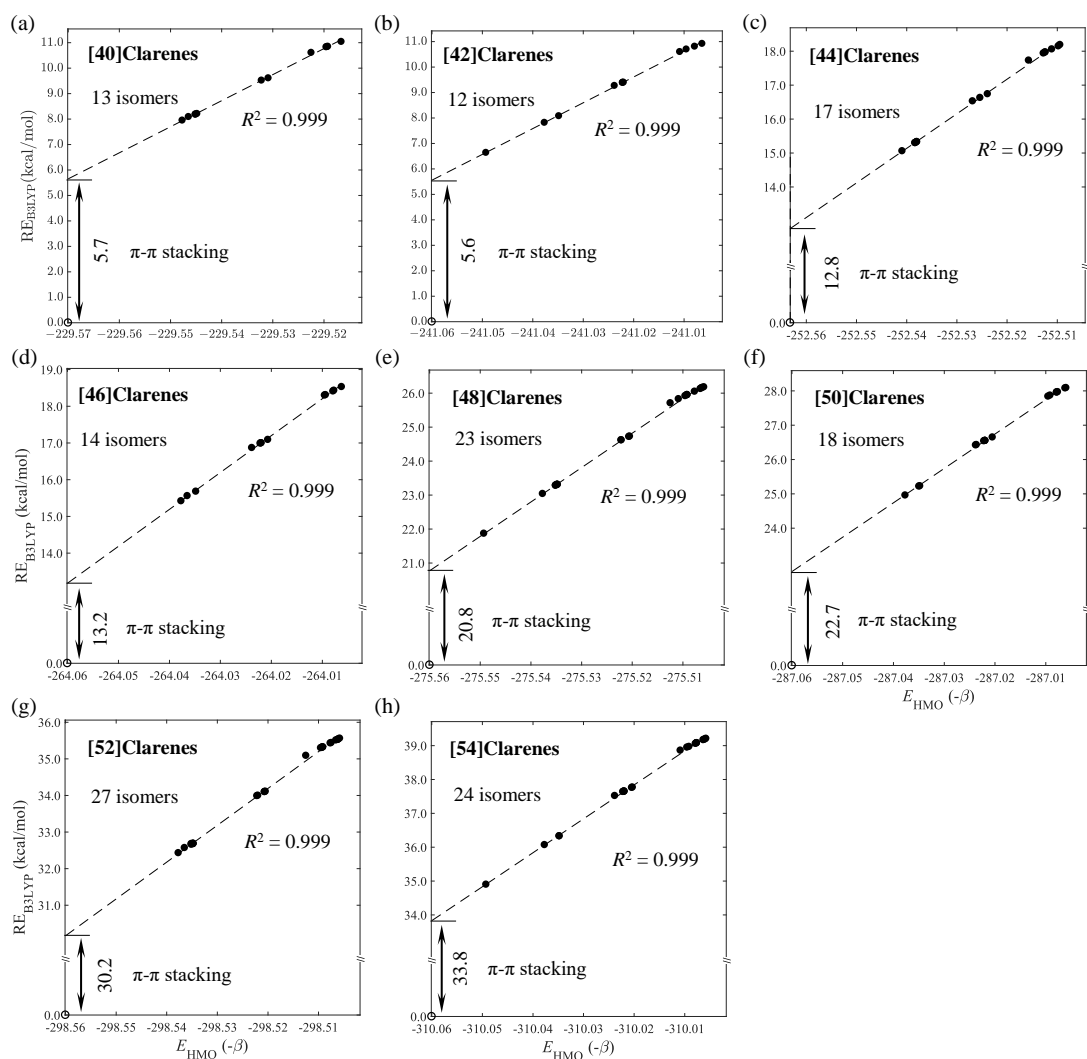

**Figure S24.** Idem Fig. S23 for clarenes of 40 to 54 rings. Structures with  $\pi-\pi$  stacking are indicated by hollow symbols. The intercept of the y axis in (c)–(h) represents  $\pi-\pi$  stacking effect. Squared correlation coefficients ( $R^2$ ) are only for filled symbols.

## 8 IRI maps for $\pi-\pi$ stacking in equiangular hexagonal clarenes

Fig. S25-S26 shows IRI<sup>15</sup> maps for the lowest-energy isomers of [48] and [60]clarenes. As we can see, the region between the two longest opposite sides of clarenes is dominated by the IRI isosurface with green color, indicating clearly the existence of  $\pi-\pi$  stacking in the clarenes.

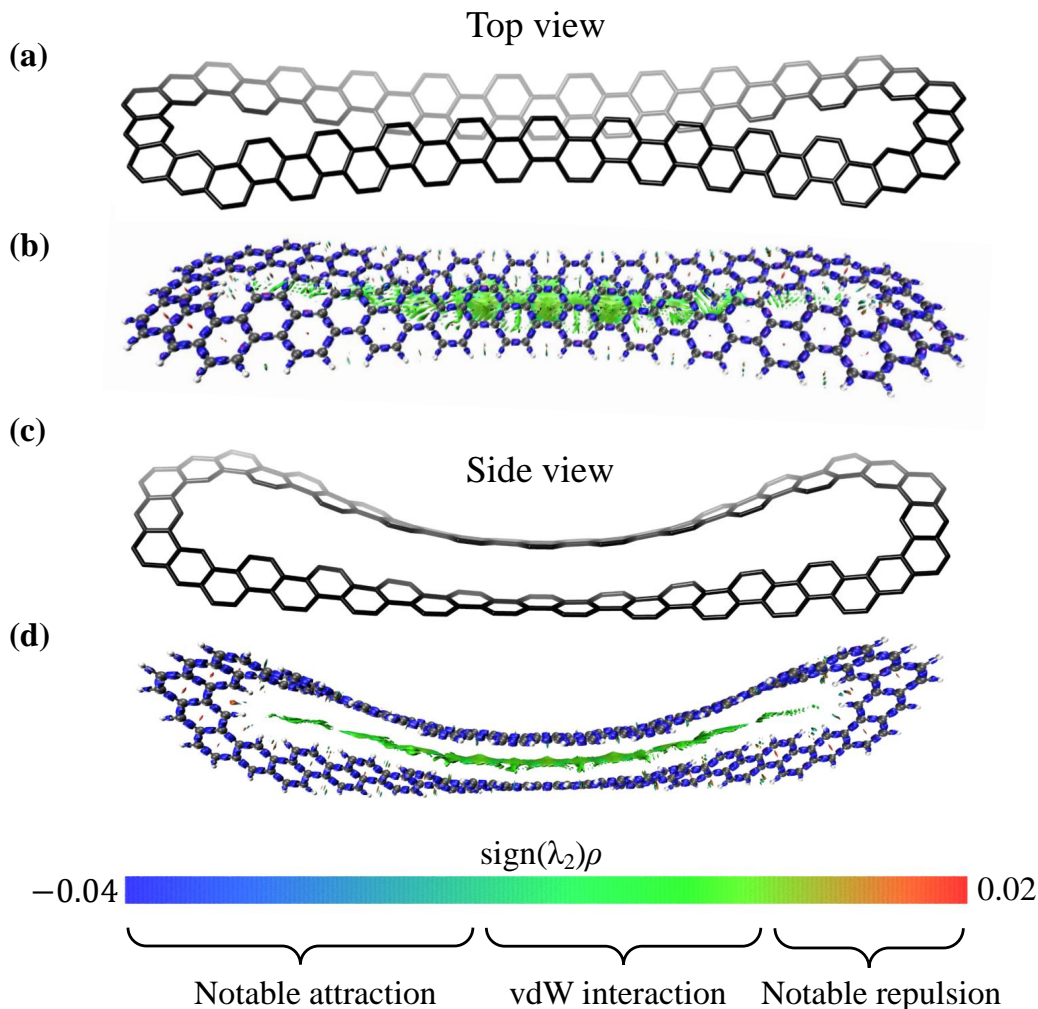

**Figure S25.** (a) Top view and (c) side view of the optimized structure calculated at the  $\omega$ B97XD/cc-pVDZ level for the lowest-energy isomer of [48]clarene  $\langle 2,2,20,2,2,20 \rangle$ . (b) Top view and (d) side view of the  $\text{sign}(\lambda_2)\rho$  mapped isosurface of IRI = 1.0 for the same molecule. The color bar below denotes the different types of noncovalent interactions, as represented by the colors of the isosurface.

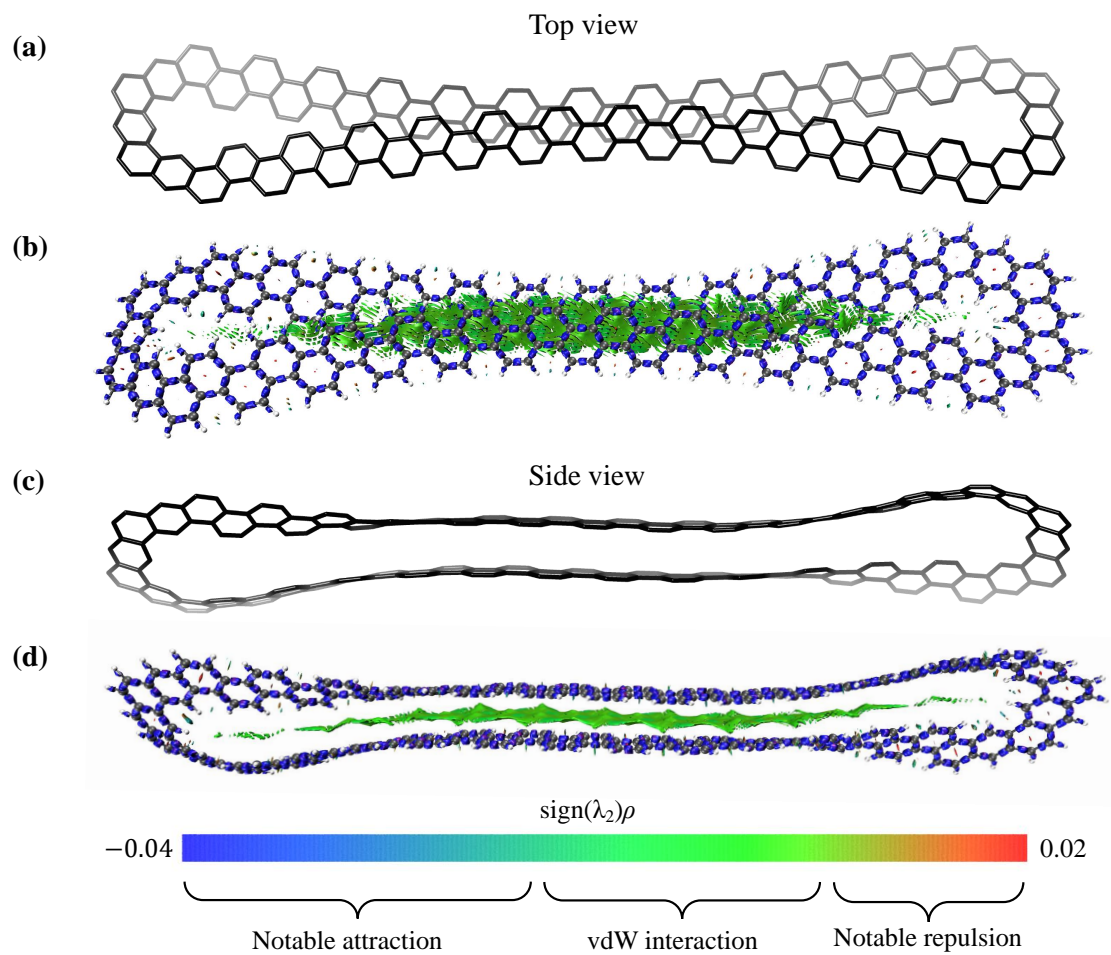

**Figure S26.** Idem Fig. S25 for the lowest-energy isomer of [60]clarene  $\langle 2,2,26,2,2,26 \rangle$ .

## 9 Demonstration of construction of nonequiangular hexagons

For [42], [46], [50], [54], and [58]clarenes, we additionally construct nonequiangular hexagonal clarenes with distorted structures based on stadium-type clarenes ( $N_{\text{ring}} = 44, 48, 52, 56, 60$ ) with distorted structures to obtain more stable isomers at the same ring sizes. Fig. S27(a) shows the construction diagram of the nonequiangular stadium-type hexagons, and we only need to deduct two rings from either long side of clarenes. For stadium-type structure of [60]clarene,  $\langle 2,2,26,2,2,26 \rangle$ , we also considered the nonequiangular stadium-type structures of [60]clarene,  $\langle 2,2,24,2,2,28 \rangle$  and  $\langle 2,2,22,2,2,30 \rangle$ , as shown in Fig. S27(b).

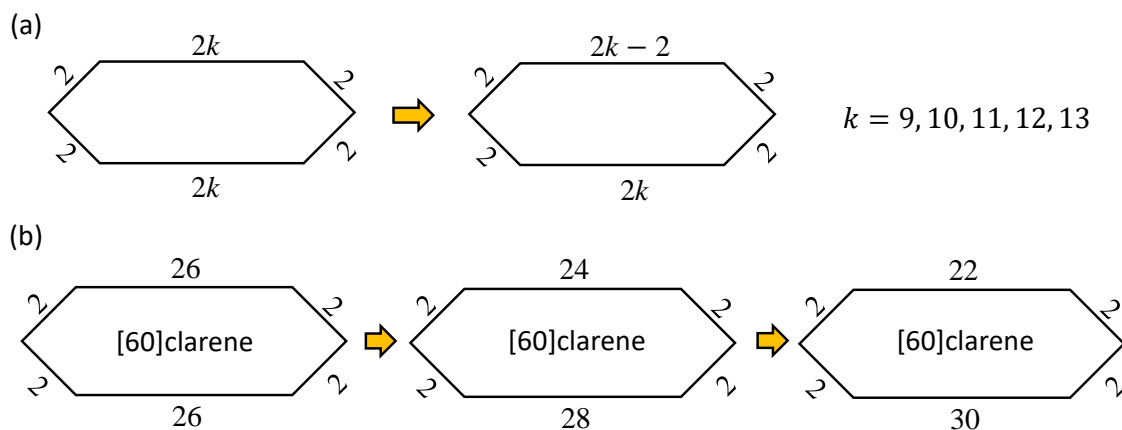

**Figure S27.** Construction method of nonequiangular hexagons. Side lengths represent the valid number of benzene rings as mentioned in Section 3.1 in main text.

## 10 Simple HMO model for predicting relative energies of kekulenes

Fig. S28-S29 show the correlation between  $\pi$  energy predicted by HMO,  $E_{\text{HMO}}$  and the DFT relative energies of kekulene isomers,  $\text{RE}_{\text{B3LYP}}$ . The relative energies of isomers are good correlation with  $\pi$  energy predicted by HMO with squared correlation coefficient ( $R^2$ ) higher than 0.9.

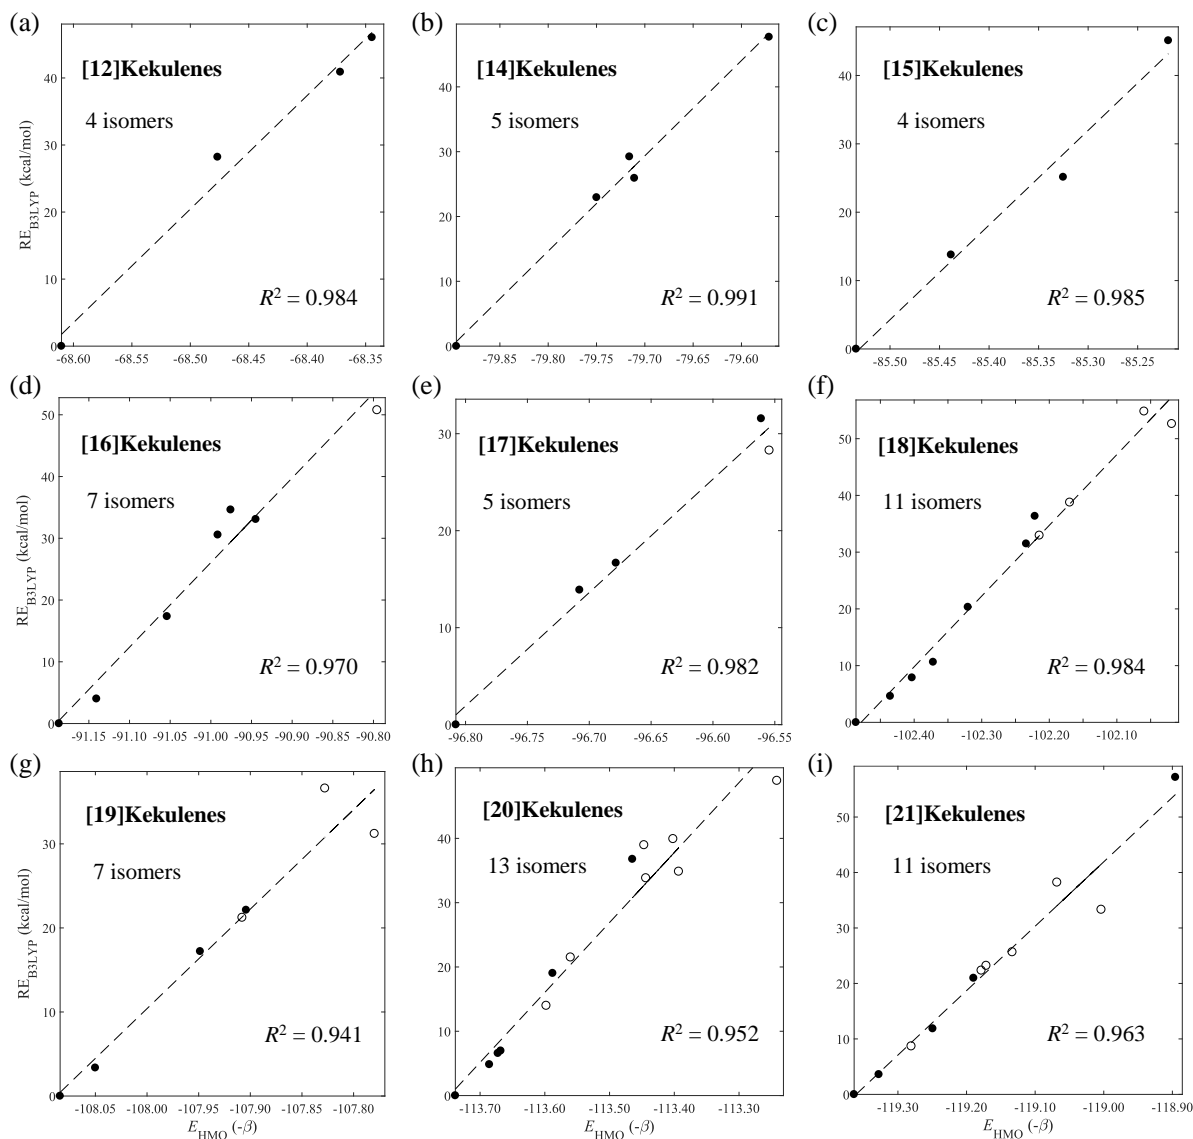

**Figure S28.** DFT relative energies,  $\text{RE}_{\text{B3LYP}}$ , versus HMO  $\pi$  energies,  $E_{\text{HMO}}$ , for kekulenes of 12 to 21 rings. Closed shell structures and open-shell singlet structures are represented by black filled circle and black hollow circle, respectively. Squared correlation coefficients ( $R^2$ ) are provided in each plot.



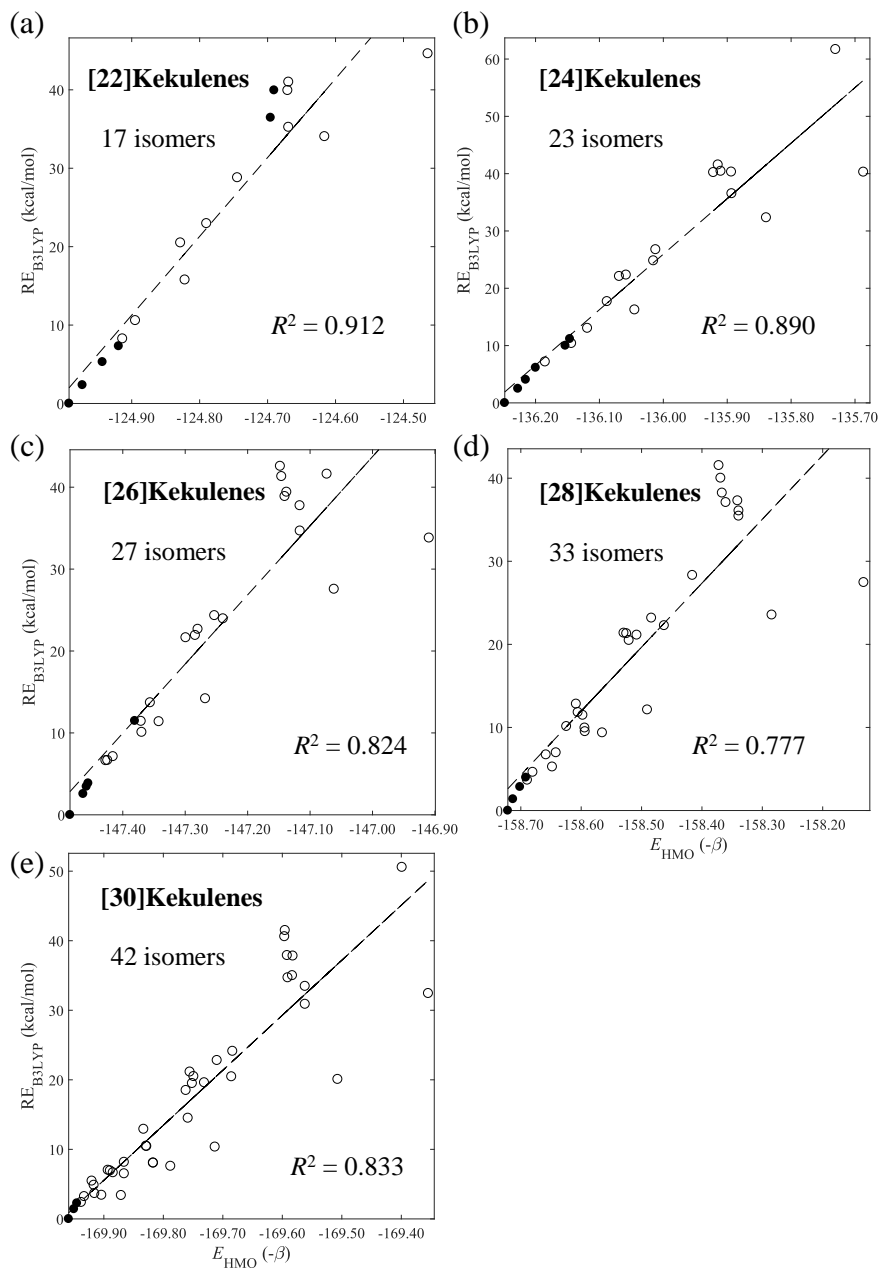

Figure S29. Idem Fig. S28 for kekulenes of 22 to 30 rings.

## 11 Lowest-energy kekulene and clarene isomers

Tables S1 and S2 list the relative energies of lowest-energy kekulenes and clarenes relative to the lowest-energy isomer of cycloarenes of same molecular size, and corresponding structures are shown in Fig. S30-S34.

**Table S1.** Lowest-energy isomers of kekulenes with the number of rings ( $N_{\text{ring}}$ ) from 8 to 60. We also present the  $\omega$ B97XD/cc-pVDZ relative energies (RE) of these isomers relative to lowest-energy isomer of cycloarenes.

| $N_{\text{ring}}$ | Kekulene      | RE(kcal/mol) | $N_{\text{ring}}$ | Kekulene        | RE(kcal/mol) |
|-------------------|---------------|--------------|-------------------|-----------------|--------------|
| 8                 | [1,1,2,1,1,2] | 0.00         | 21                | [3,4,3,4,3,4]   | 0.00         |
| 9                 | [1,2,1,2,1,2] | 0.00         | 22                | [3,4,4,3,4,4]   | 45.63        |
| 10                | [1,2,2,1,2,2] | 0.00         | 24                | [4,4,4,4,4,4]   | 61.32        |
| 11                | [1,2,2,2,1,3] | 0.00         | 26                | [4,4,5,4,4,5]   | 72.70        |
| 12                | [2,2,2,2,2,2] | 0.00         | 28                | [4,5,5,4,5,5]   | 91.59        |
| 13                | [1,3,2,2,2,3] | 0.00         | 30                | [5,5,5,5,5,5]   | 103.77       |
| 14                | [2,2,3,2,2,3] | 0.00         | 32                | [4,4,8,4,4,8]   | 116.40       |
| 15                | [2,3,2,3,2,3] | 0.00         | 34                | [4,4,9,4,4,9]   | 123.46       |
| 16                | [2,3,3,2,3,3] | 15.68        | 36                | [4,4,10,4,4,10] | 139.82       |
| 17                | [2,3,3,3,2,4] | 0.00         | 42                | [2,2,17,2,2,17] | 173.87       |
| 18                | [3,3,3,3,3,3] | 21.96        | 48                | [1,2,21,1,2,21] | 208.90       |
| 19                | [2,4,3,3,3,4] | 0.00         | 54                | [2,2,23,2,2,23] | 245.62       |
| 20                | [3,3,4,3,3,4] | 36.28        | 60                | [1,2,27,1,2,27] | 280.44       |

**Table S2.** Idem Table S1 for Clarenes with the number of rings ( $N_{\text{ring}}$ ) from 16 to 60.

| $N_{\text{ring}}$ | Clarene               | RE(kcal/mol) | $N_{\text{ring}}$ | Clarene                           | RE(kcal/mol) |
|-------------------|-----------------------|--------------|-------------------|-----------------------------------|--------------|
| 16                | <2, 2, 4, 2, 2, 4>    | 0.00         | 42                | <2, 2, 16, 2, 2, 18> <sup>a</sup> | 0.00         |
| 18                | <2, 4, 2, 4, 2, 4>    | 0.00         | 44                | <2, 2, 18, 2, 2, 18>              | 0.00         |
| 20                | <2, 2, 6, 2, 2, 6>    | 0.00         | 46                | <2, 4, 16, 4, 2, 18>              | 12.56        |
| 22                | <2, 4, 4, 4, 2, 6>    | 0.00         | 46                | <2, 2, 18, 2, 2, 20> <sup>a</sup> | 0.00         |
| 24                | <2, 2, 8, 2, 2, 8>    | 0.00         | 48                | <2, 2, 20, 2, 2, 20>              | 0.00         |
| 26                | <2, 4, 6, 4, 2, 8>    | 0.00         | 50                | <2, 4, 18, 4, 2, 20>              | 22.66        |
| 28                | <2, 2, 10, 2, 2, 10>  | 0.00         | 50                | <2, 2, 20, 2, 2, 22> <sup>a</sup> | 0.00         |
| 30                | <2, 8, 2, 8, 2, 8>    | 0.00         | 52                | <2, 2, 22, 2, 2, 22>              | 0.00         |
| 32                | <2, 2, 12, 2, 2, 12>  | 0.00         | 54                | <2, 16, 2, 16, 2, 16>             | 32.34        |
| 34                | <2, 4, 10, 4, 2, 12>  | 0.00         | 54                | <2, 2, 22, 2, 2, 24> <sup>a</sup> | 0.00         |
| 36                | <2, 2, 14, 2, 2, 14>  | 0.00         | 56                | <2, 2, 24, 2, 2, 24>              | 0.00         |
| 38                | <2, 4, 12, 4, 2, 14>  | 0.00         | 58                | <2, 4, 22, 4, 2, 24>              | 44.51        |
| 40                | <2, 2, 16, 2, 2, 16>  | 0.00         | 58                | <2, 2, 24, 2, 2, 26> <sup>a</sup> | 0.00         |
| 42                | <2, 12, 2, 12, 2, 12> | 3.92         | 60                | <2, 2, 26, 2, 2, 26>              | 0.00         |

<sup>a</sup> represent nonequangular hexagonal clarenes.

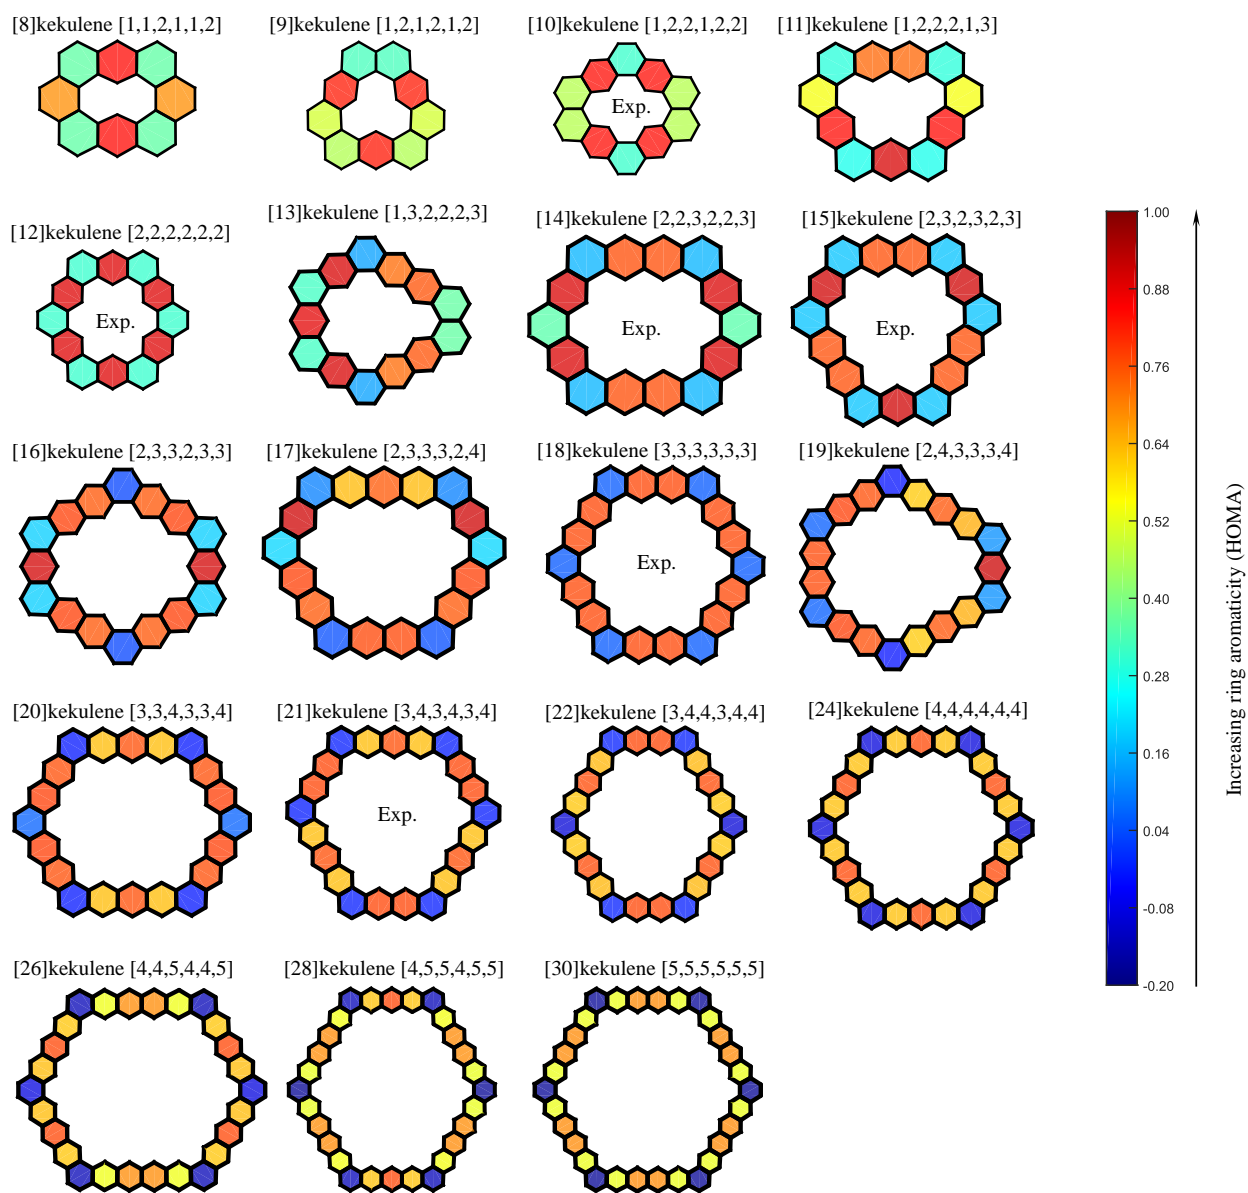

**Figure S30.** Structures of the most stable isomers of kekulenes of 8 to 30 rings. The rings are colored according to the  $\omega$ B97XD/cc-pVDZ computed  $\text{HOMA}^{16}$  values.

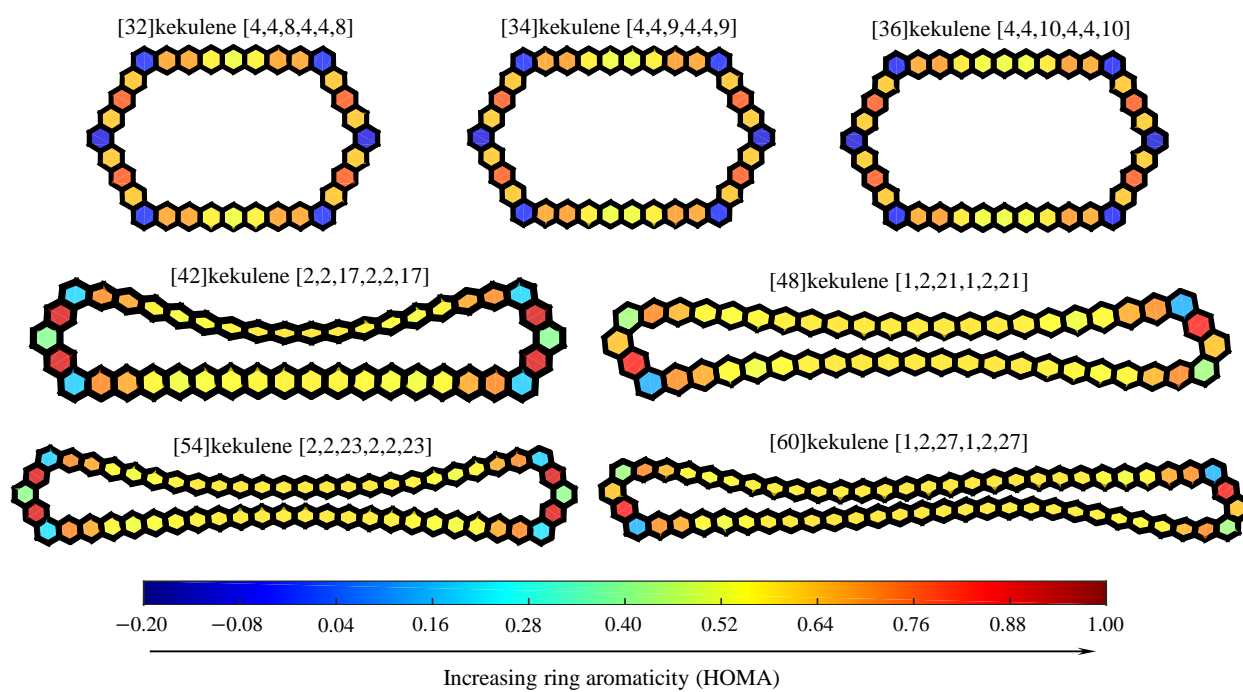

**Figure S31.** Idem Fig. S30 for the lowest-energy isomers of kekulenes of 32 to 60 rings.

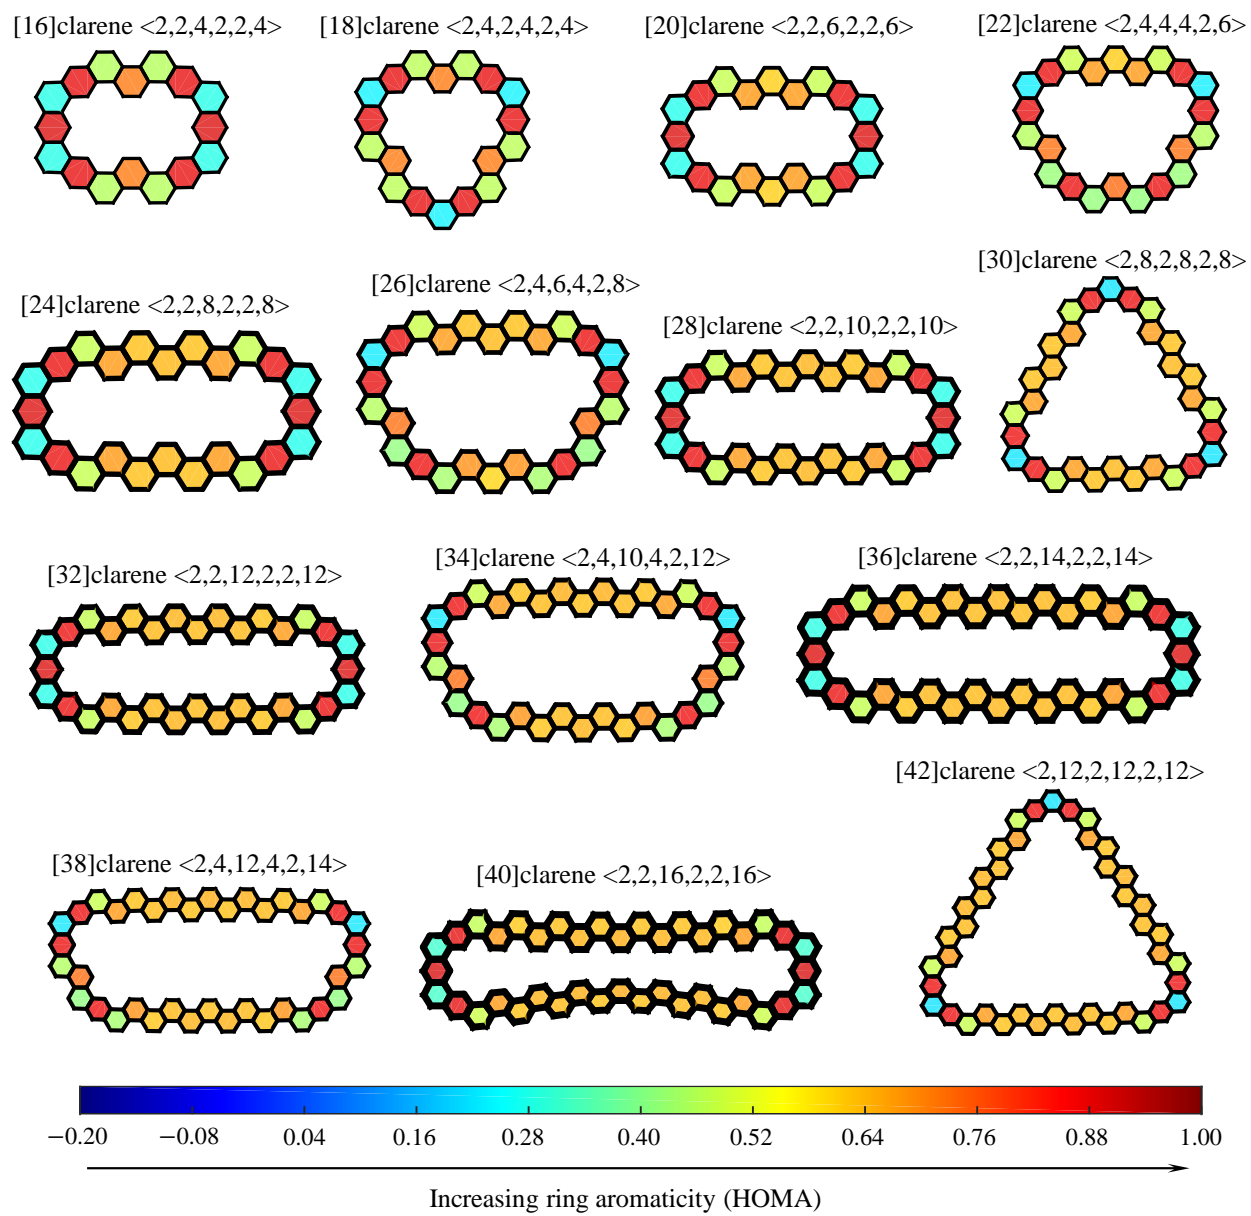

**Figure S32.** Idem Fig. S30 for the lowest-energy isomers of clarenes of 16 to 42 rings.

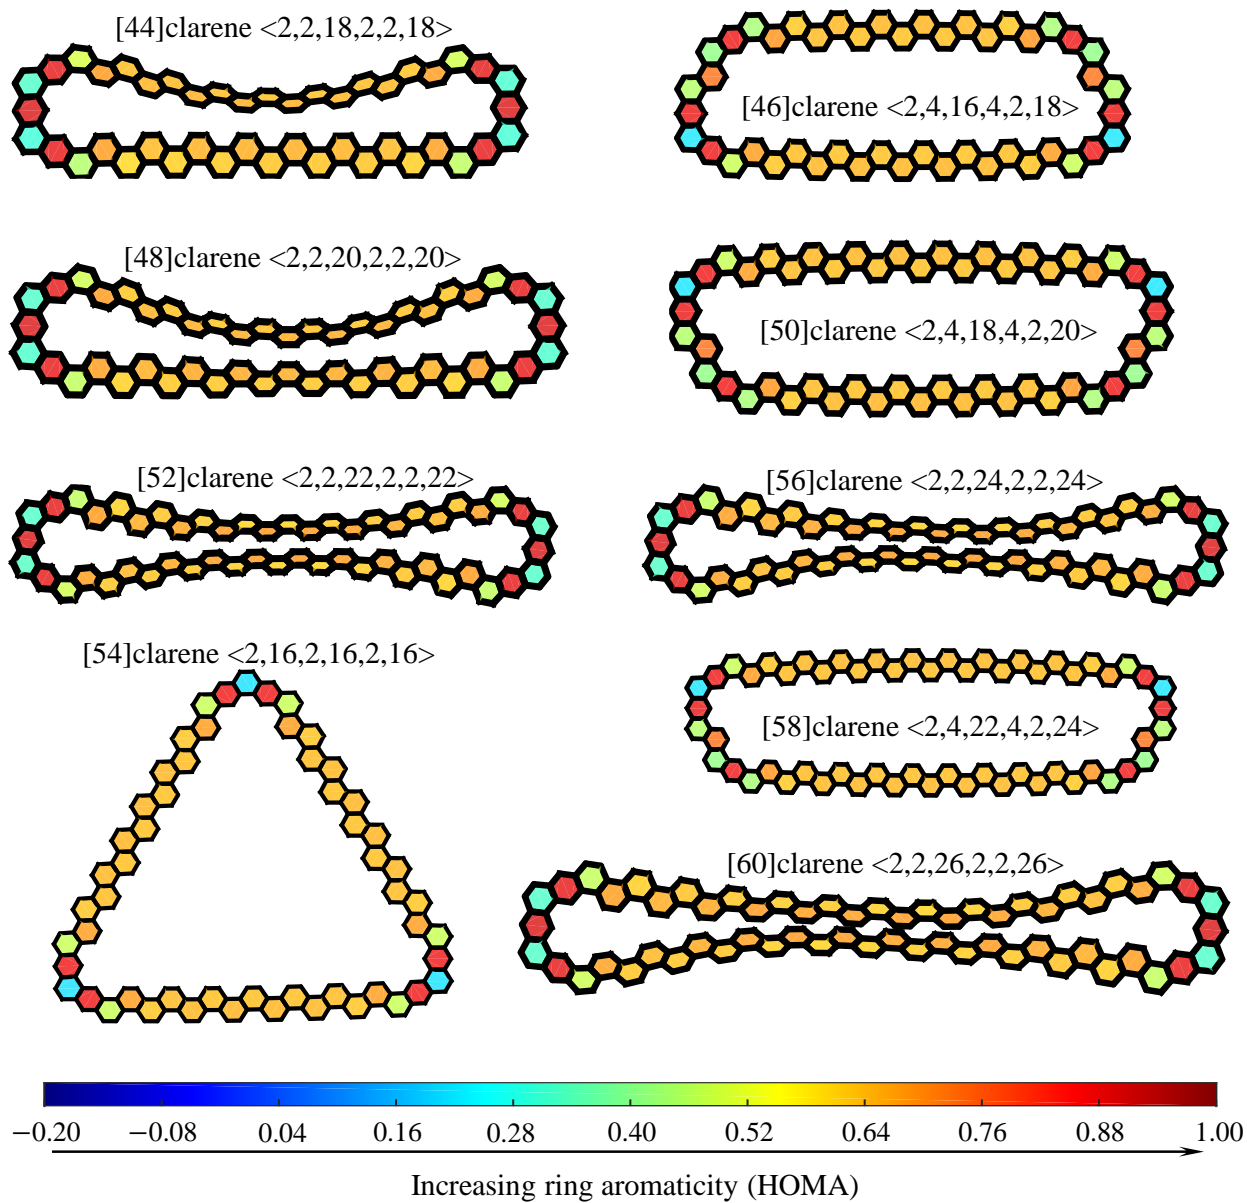

**Figure S33.** Idem Fig. S30 for the lowest-energy isomers of clarenes of 44 to 60 rings.

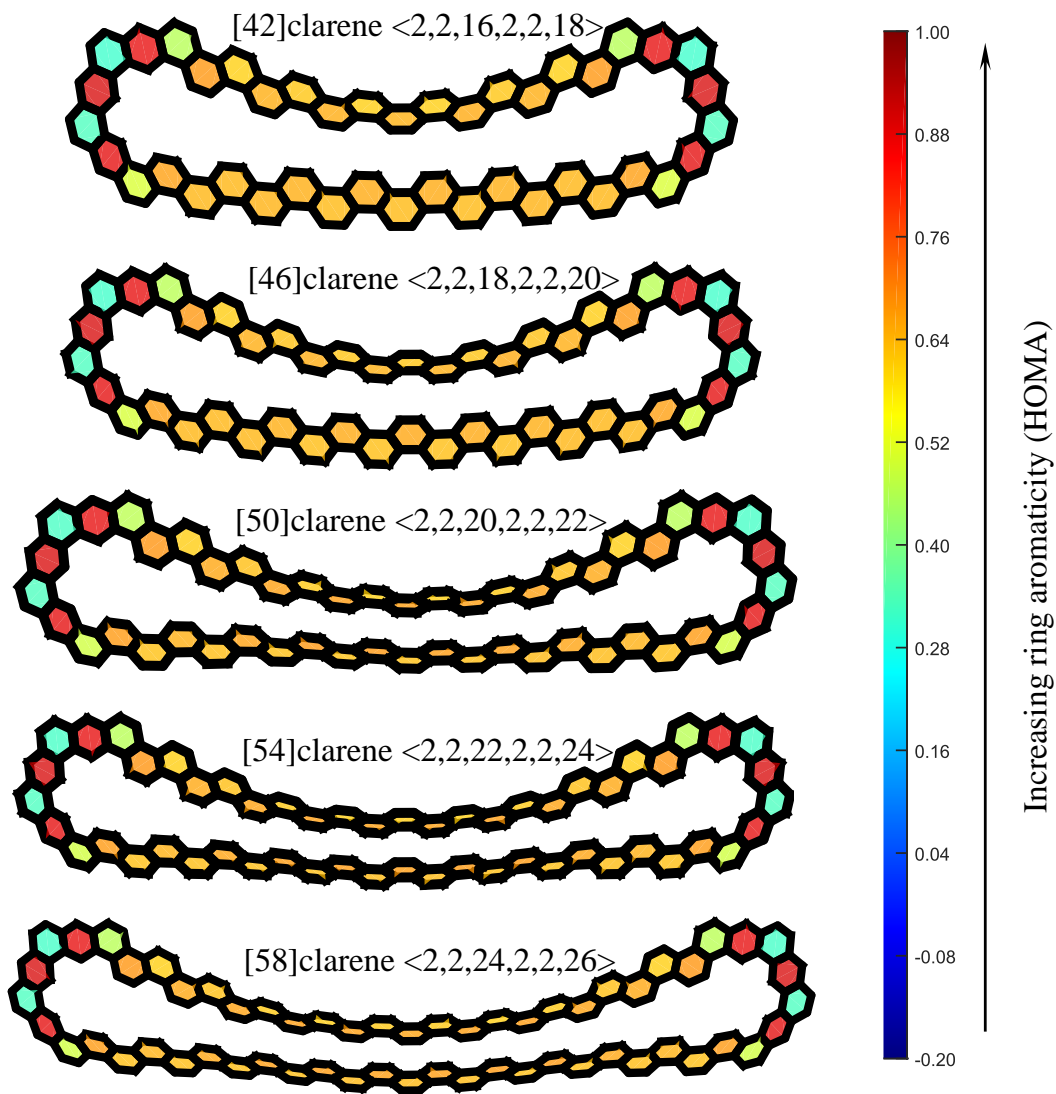

**Figure S34.** Idem Fig. S30 for the lowest-energy nonequilateral hexagonal clarene structures from 42 to 58 rings.



## 12 Clar resonance structures for [30]clarene $\langle 2,8,2,8,2,8 \rangle$

In Fig. S35, we show some representative Clar resonators<sup>17</sup> with different number of sextets for [30]clarene  $\langle 2,8,2,8,2,8 \rangle$ .

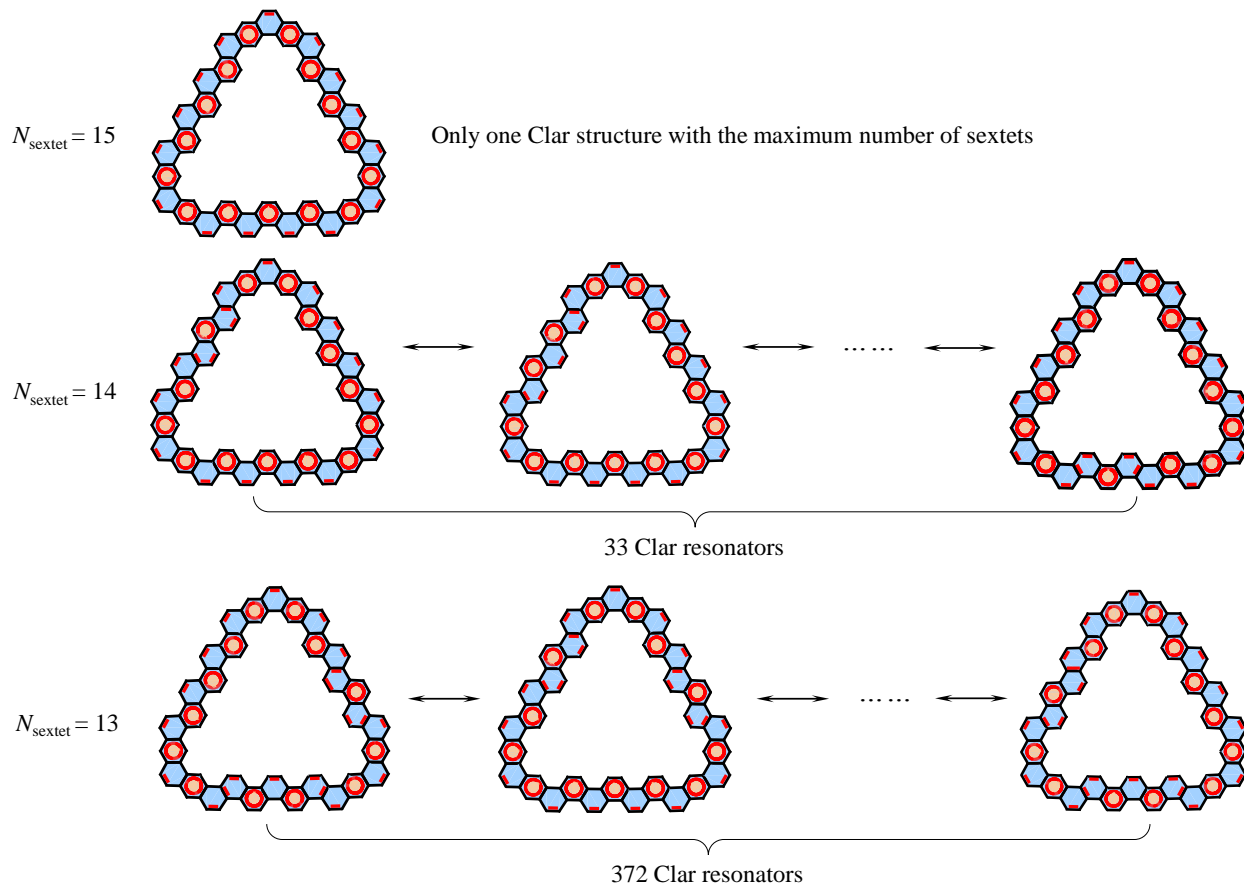

**Figure S35.** Clar resonators for [30]clarene  $\langle 2,8,2,8,2,8 \rangle$  with the number of sextets,  $N_{\text{sextet}} = 13, 14, 15$ . Clar sextets are represented by red circles.

### 13 IRI maps for $\pi-\pi$ stacking in nonequiangular hexagonal clarenes

Fig. S36-S37 shows the IRI<sup>15</sup> maps for the lowest-energy isomers of [50] and [54]clarenes. As we can see, the region between the longest opposite sides of clarenes is dominated by the IRI isosurface with green color, indicating clearly the existence of  $\pi-\pi$  stacking in the clarenes.

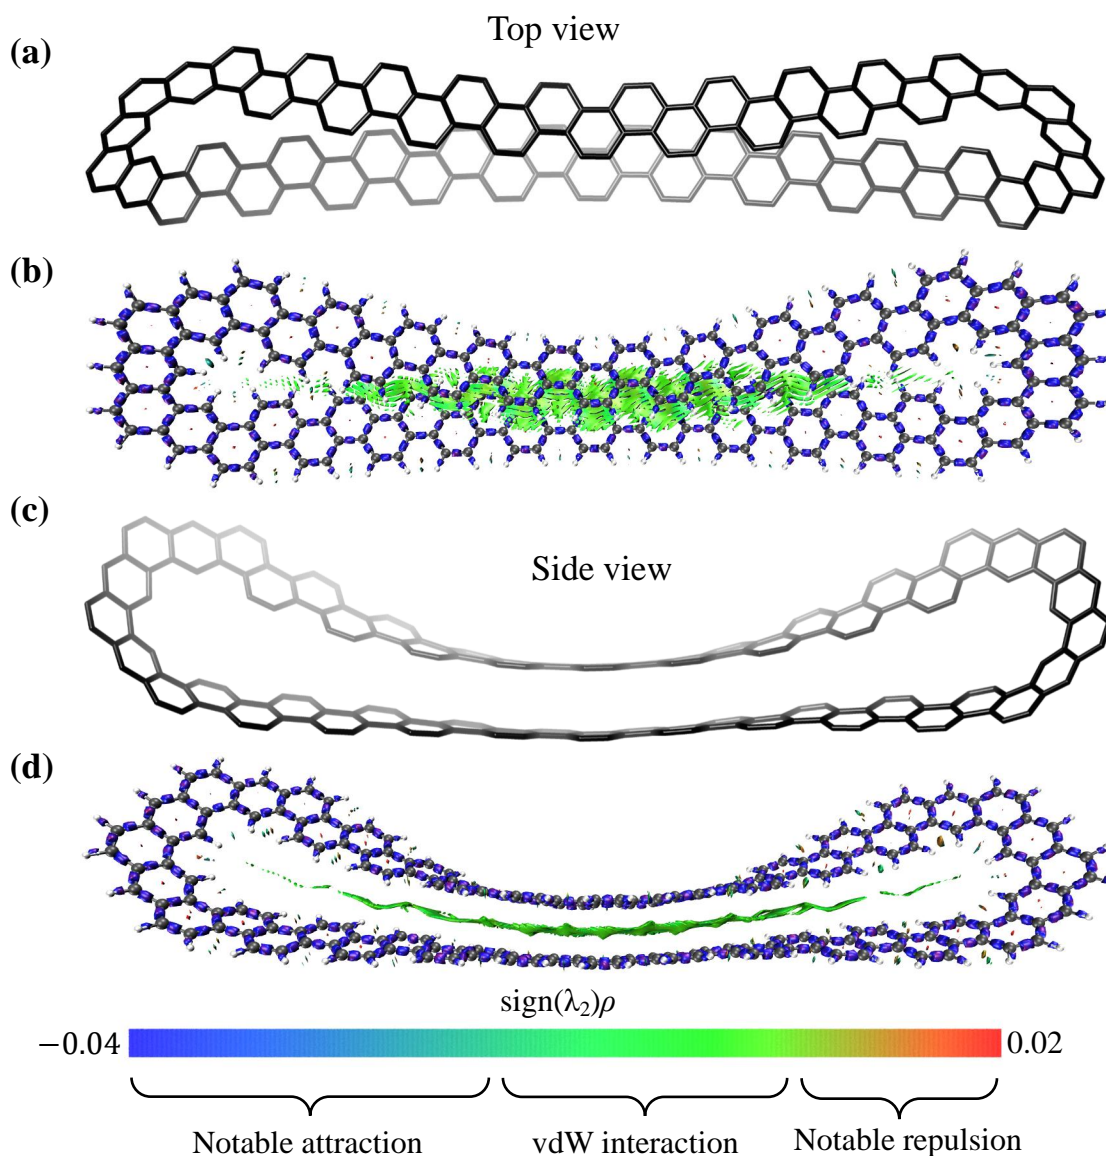

Figure S36. Idem Fig. S25 for the lowest-energy isomer of [50]clarene  $\langle 2,2,20,2,2,22 \rangle$ .

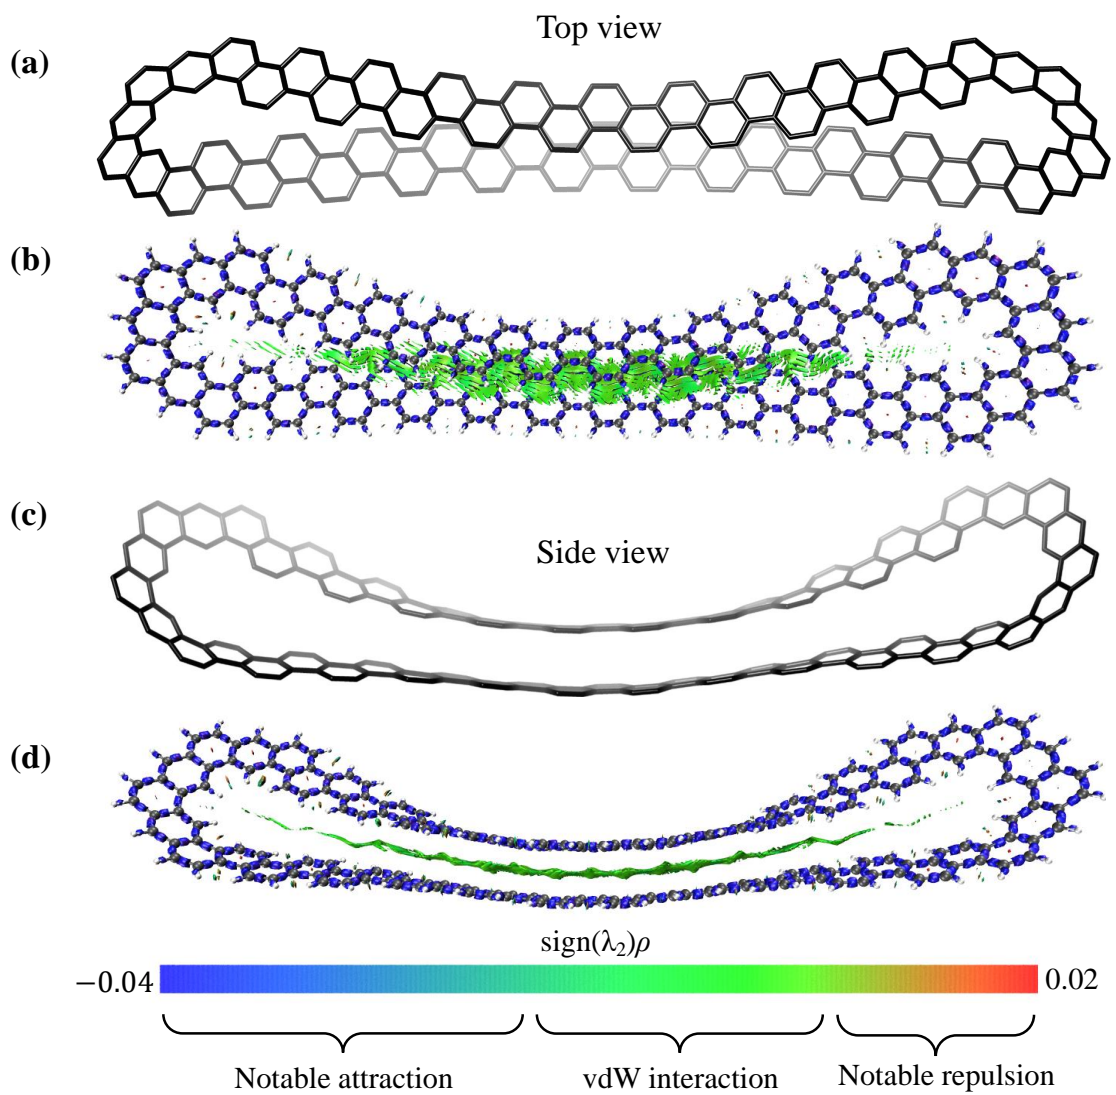

**Figure S37.** Idem Fig. S25 for the lowest-energy isomer of [54]clarene  $\langle 2,2,22,2,2,24 \rangle$ .

## 14 Relative stability of $\pi-\pi$ stacking conformers

We consider three isomers of [60]clarenes ( $\langle 2,2,26,2,2,26 \rangle$ ,  $\langle 2,2,24,2,2,28 \rangle$  and  $\langle 2,2,22,2,2,30 \rangle$ ) and search all possible conformers for each isomer, 37 in total, as shown in Table S3. Different conformers of each isomer can be converted into each other. Obviously, for [60]clarene  $\langle 2,2,22,2,2,30 \rangle$  (see Fig. S38(c) and (d)), the relative shift between the longest opposite sides of clarene can cause the existence of different conformers.

**Table S3.** Different conformers of each isomer and corresponding relative energies with respect to lowest-energy conformers. Labels represent different conformers.

| $\langle 2,2,26,2,2,26 \rangle$ |              | $\langle 2,2,24,2,2,28 \rangle$ |              | $\langle 2,2,22,2,2,30 \rangle$ |              |
|---------------------------------|--------------|---------------------------------|--------------|---------------------------------|--------------|
| Labels                          | RE(kcal/mol) | Labels                          | RE(kcal/mol) | Labels                          | RE(kcal/mol) |
| 1                               | 0.97         | 1                               | 0.00         | 1                               | 2.73         |
| 2                               | 0.83         | 2                               | 0.02         | 2                               | 2.73         |
| 3                               | 0.97         | 3                               | 0.01         | 3                               | 2.74         |
| 4                               | 0.97         | 4                               | 0.02         | 4                               | 0.03         |
| 5                               | 0.97         | 5                               | 0.02         | 5                               | 0.00         |
| 6                               | 0.97         | 6                               | 0.01         | 6                               | 0.03         |
| 7                               | 0.97         | 7                               | 0.01         | 7                               | 0.02         |
| 8                               | 0.00         | 8                               | 0.01         | 8                               | 0.02         |
| 9                               | 0.00         | 9                               | 0.01         | 9                               | 0.01         |
| 10                              | 0.00         | 10                              | 0.01         | 10                              | 0.02         |
| 11                              | 0.00         | 11                              | 0.01         | 11                              | 0.00         |
| 12                              | 0.00         | 12                              | 0.01         | -                               | -            |
| 13                              | 0.00         | 13                              | 0.01         | -                               | -            |

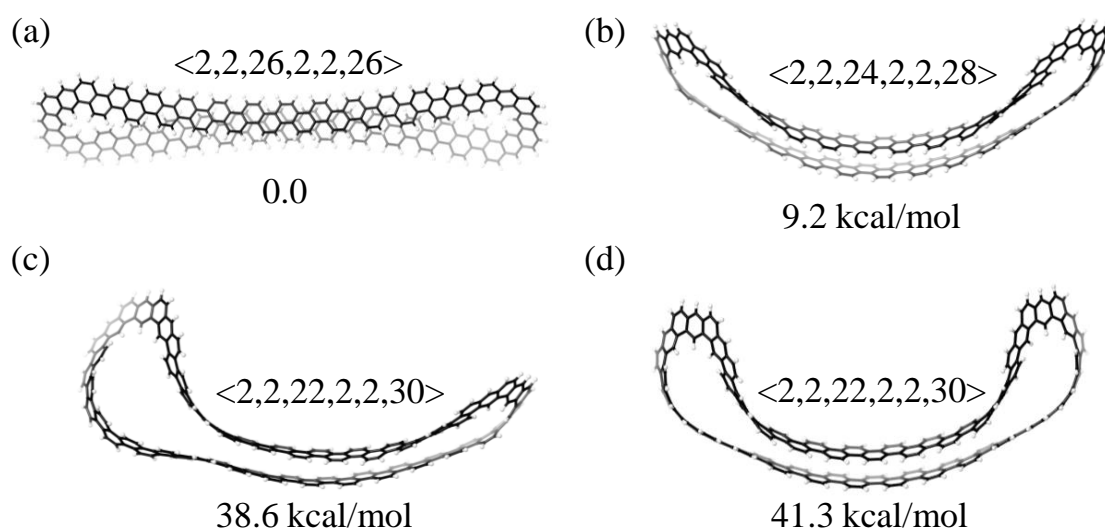

**Figure S38.** (a)-(c) Structures of lowest-energy  $\pi-\pi$  stacking conformers for [60]clarenes,  $\langle 2,2,26,2,2,26 \rangle$ ,  $\langle 2,2,24,2,2,28 \rangle$  and  $\langle 2,2,22,2,2,30 \rangle$ , respectively. (d) The most unstable  $\pi-\pi$  stacking conformers of [60]clarenes  $\langle 2,2,22,2,2,30 \rangle$ . Relative energies computed at the B3LYP-D3(BJ)/6-31G\* level are given below each conformer structure in kcal/mol.

# 15 Cartesian coordinates and absolute energies for lowest-energy kekulene and clarene isomers

In the following, we provide the Cartesian coordinates of the lowest-energy isomers of kekulene and clarene isomers, optimized at the wB97XD/cc-pVDZ level. For each molecule, we provide the absolute energies. All energies are given in Hartree and the atomic coordinates are in Å.

## 1. [8]kekulene [1,1,2,1,1,2]

E(wB97XD/cc-pVDZ) = -1228.73389954  
No imaginary frequency (B3LYP/6-31G\*)

|   |             |             |             |
|---|-------------|-------------|-------------|
| 6 | -0.84157700 | -0.28430300 | 0.42460100  |
| 6 | 0.51560700  | -0.17520800 | 0.28782000  |
| 6 | 0.28089500  | 2.14064500  | -0.47960400 |
| 6 | 1.10172200  | 1.03398600  | -0.16962600 |
| 6 | 2.53559900  | 1.14844800  | -0.28271600 |
| 1 | 3.13822600  | 0.27734000  | -0.01615600 |
| 6 | 3.13752700  | 2.31543200  | -0.62601300 |
| 6 | 2.35069400  | 3.44851800  | -1.03334800 |
| 6 | 0.93647300  | 3.27885600  | -1.13337600 |
| 1 | -1.29498500 | -1.23701600 | 0.70640400  |
| 1 | 1.16366300  | -1.02904700 | 0.49661900  |
| 1 | 4.22593700  | 2.40370300  | -0.61903400 |
| 6 | -4.24024800 | 4.17325000  | -0.43157700 |
| 6 | -3.42780400 | 3.06669300  | -0.14715900 |
| 6 | -2.01550900 | 3.25422900  | -0.05203400 |
| 6 | -1.54374800 | 4.56629700  | -0.05231900 |
| 6 | -3.95106000 | 1.75171000  | 0.10973400  |
| 6 | -1.11287600 | 2.09800800  | -0.08331500 |
| 6 | -1.67986200 | 0.84731000  | 0.24655000  |
| 6 | -3.11191200 | 0.71579500  | 0.36425600  |
| 1 | -5.03335000 | 1.60663500  | 0.11818900  |
| 1 | -5.32692100 | 4.05764700  | -0.42681100 |
| 1 | -3.51441700 | -0.27135200 | 0.60208500  |
| 6 | 2.91108200  | 4.68474600  | -1.38437400 |
| 6 | 2.09863900  | 5.79130400  | -1.66877900 |
| 6 | 0.68634000  | 5.60377400  | -1.76387900 |
| 6 | 0.21456800  | 4.29171100  | -1.76357800 |
| 6 | 2.62189500  | 7.10628700  | -1.92567900 |
| 6 | -0.21628600 | 6.76000100  | -1.73258100 |
| 6 | 0.35069900  | 8.01069600  | -2.06246100 |
| 6 | 1.78275000  | 8.14220500  | -2.18018800 |
| 1 | 3.70418700  | 7.25135600  | -1.93415000 |
| 1 | 3.99775500  | 4.80034300  | -1.38915500 |
| 1 | 2.18525400  | 9.12935000  | -2.41802800 |
| 6 | -3.67986000 | 5.40947900  | -0.78259000 |
| 6 | -2.26564200 | 5.57914700  | -0.68253700 |
| 6 | -1.61005400 | 6.71736700  | -1.33628900 |
| 6 | -2.43088200 | 7.82402400  | -1.64627400 |
| 6 | -3.86476100 | 7.70955700  | -1.53320000 |
| 6 | -4.46669100 | 6.54256900  | -1.18992300 |
| 6 | -0.48758400 | 9.14231000  | -2.24050800 |
| 6 | -1.84476800 | 9.03321600  | -2.10372100 |
| 1 | -4.46738700 | 8.58066600  | -1.79976300 |
| 1 | -5.55510100 | 6.45429400  | -1.19691700 |
| 1 | -0.03417700 | 10.09502000 | -2.52232300 |
| 1 | -2.49282500 | 9.88705400  | -2.31252700 |

|   |             |            |             |
|---|-------------|------------|-------------|
| 1 | -0.52583500 | 4.76026900 | 0.25934000  |
| 1 | -0.80336400 | 4.09774900 | -2.07519100 |

## 2. [9]kekulene [1,2,1,2,1,2]

E(wB97XD/cc-pVDZ) = -1382.34916085  
No imaginary frequency (B3LYP/6-31G\*)

|   |             |             |             |
|---|-------------|-------------|-------------|
| 6 | -0.00817800 | 4.21006300  | -0.22489300 |
| 6 | -0.00549100 | 2.83019600  | -0.45677500 |
| 6 | -1.30461300 | 2.13831100  | -0.41243500 |
| 6 | -2.48780400 | 2.84189300  | -0.00660400 |
| 6 | -2.42738200 | 4.27229100  | 0.10783900  |
| 6 | -1.24538100 | 4.92238100  | -0.03241600 |
| 6 | -1.46761900 | 0.76604900  | -0.61101100 |
| 6 | -3.67695700 | 2.13529000  | 0.24179100  |
| 6 | -3.73079600 | 0.73413000  | 0.23061700  |
| 6 | -2.54901700 | 0.02913400  | -0.13245200 |
| 6 | -2.48552000 | -1.41868200 | -0.02391300 |
| 6 | -3.67669400 | -2.12614200 | 0.12753200  |
| 6 | -4.89707100 | -1.39828800 | 0.37186900  |
| 6 | -4.91736300 | -0.04057000 | 0.48263500  |
| 1 | -0.74439200 | 0.20431200  | -1.16483900 |
| 1 | -3.34234200 | 4.82329200  | 0.33522400  |
| 1 | -1.19976200 | 6.00777500  | 0.08080300  |
| 1 | -4.58274200 | 2.70133100  | 0.47422000  |
| 1 | -5.81680700 | -1.96967100 | 0.51713300  |
| 1 | -5.84519900 | 0.47875100  | 0.73170600  |
| 6 | 2.41076800  | 4.28171700  | 0.10789000  |
| 6 | 2.47677000  | 2.85156400  | -0.00657500 |
| 6 | 1.29632200  | 2.14339000  | -0.41241200 |
| 6 | 1.22623900  | 4.92718700  | -0.03238000 |
| 1 | 3.32356300  | 4.83628400  | 0.33530800  |
| 1 | 1.17638500  | 6.01239400  | 0.08085200  |
| 6 | 3.66864800  | 2.14955900  | 0.24180900  |
| 6 | 3.72791900  | 0.74861600  | 0.23061700  |
| 6 | 2.54888600  | 0.03904100  | -0.13244300 |
| 6 | 1.46463700  | 0.77177700  | -0.61097600 |
| 1 | 5.84329700  | 0.50144600  | 0.73169700  |
| 1 | 4.57223500  | 2.71909800  | 0.47425600  |
| 6 | 4.91748500  | -0.02147500 | 0.48263000  |
| 6 | 2.49101200  | -1.40901500 | -0.02390800 |
| 1 | 0.74352900  | 0.20729300  | -1.16477500 |
| 6 | 3.68491900  | -2.11185300 | 0.12753800  |
| 6 | 4.90246100  | -1.37926500 | 0.37187400  |
| 1 | 5.82440900  | -1.94706700 | 0.51714300  |
| 6 | 3.66412000  | -3.54992300 | 0.04678700  |
| 6 | 2.50908100  | -4.24130700 | -0.15884500 |
| 6 | 1.23656900  | -3.56792200 | -0.18326800 |

```

6 1.23452300 -2.14690300 -0.03145700
1 4.61329800 -4.08546400 0.12243400
1 2.53007900 -5.32826900 -0.26307400
6 0.00824500 -4.24654100 -0.23522600
6 -1.22271000 -3.57269600 -0.18326500
6 -1.22617200 -2.15168700 -0.03145600
6 0.00295900 -1.52303100 0.17552300
1 -2.50937200 -5.33804700 -0.26307500
1 0.01037100 -5.33848900 -0.28623800
6 -2.49260100 -4.25101100 -0.15884500
1 0.00097500 -0.50761700 0.54571500
6 -3.65031900 -3.56411700 0.04678100
1 -4.59740600 -4.10334600 0.12242100

```

```

1 6.01217600 -1.19512800 0.19591300
1 1.20249900 -6.67253400 0.15051900
1 3.35112100 -5.50971900 0.42195100
1 -3.34363100 -5.50853800 -0.45327200
1 -1.19404700 -6.67197400 -0.19230100
1 -6.00954000 1.21089800 0.19677900
1 -6.00822700 -1.19831700 -0.18813700
1 4.65977400 3.43955500 -0.30447500
1 0.60585900 0.85410100 0.62536400
1 0.60744600 -0.83609700 -0.60526300
1 4.66202100 -3.41824600 0.33113600
1 -0.60388600 -0.84236000 0.61686300
1 -4.65628200 -3.41900900 -0.34350900
1 -4.65967500 3.43270900 0.35438800
1 -0.60370300 0.85946600 -0.59967800

```

### 3. [10]kekulene

[1,2,2,1,2,2]

E(wB97XD/cc-pVDZ) = -1535.96866297  
No imaginary frequency (B3LYP/6-31G\*)

```

6 -0.00054500 4.88211100 0.03138900
6 -1.23723100 5.59713900 0.18217400
6 -2.42856700 4.95404300 0.31913800
6 -2.50441000 3.52410200 0.23755500
6 -1.28944500 2.79565100 0.03227500
6 0.00001900 3.48012400 0.02497900
6 2.42742600 4.95862600 -0.25555600
6 1.23556400 5.59948400 -0.11282500
6 1.29003400 2.79675800 0.01149400
6 2.50443000 3.52806100 -0.18699600
6 5.06197900 0.68318500 -0.08693900
6 3.82949400 1.45648100 -0.14220000
6 2.61863900 0.73635100 0.01266200
6 2.61920400 -0.71669100 0.01068800
6 3.83038900 -1.43585000 0.16751600
6 5.06234500 -0.66156400 0.11431500
6 2.50695300 -3.50851000 0.21003700
6 1.29229700 -2.77819500 0.00951800
6 0.00288000 -3.46262400 -0.00626400
6 0.00346800 -4.86461100 -0.01265400
6 1.23991400 -5.58097400 0.13367600
6 2.43100700 -4.93914000 0.27843200
6 -1.28711000 -2.77918500 -0.01586400
6 -2.50114200 -3.50863500 -0.22312600
6 -2.42400200 -4.93851900 -0.30451500
6 -1.23237600 -5.58064500 -0.16552900
6 -2.61626800 0.73420000 0.01256900
6 -3.82771500 1.45189700 0.17408300
6 -5.05956300 0.67811400 0.11184500
6 -5.05883100 -0.66474200 -0.10168800
6 -3.82624300 -1.43750900 -0.16192300
6 -2.61564400 -0.71880900 0.00148600
6 3.74434500 2.84716600 -0.22460900
6 1.43246900 1.41919700 0.22307800
6 1.43391900 -1.40049100 -0.20168600
6 3.74624200 -2.82660400 0.24976100
6 -1.42986000 -1.40358600 0.20788400
6 -3.74097900 -2.82739500 -0.25673600
6 -3.74374800 2.84185000 0.26907700
6 -1.43074000 1.41997100 -0.19190000
1 -1.19983200 6.68849800 0.20904400
1 -3.34890800 5.52331000 0.46636600
1 3.34731500 5.52995900 -0.39751300
1 1.19728400 6.69101300 -0.12973700
1 6.01151700 1.21750800 -0.16696300

```

### 4. [11]kekulene

[1,2,2,2,1,3]

E(wB97XD/cc-pVDZ) = -1689.57832875  
No imaginary frequency (B3LYP/6-31G\*)

```

6 0.57561900 5.29088600 0.07154900
6 -0.66134900 6.01555600 -0.11211300
6 -1.84585400 5.37433900 -0.26066000
6 -1.94217600 3.94376000 -0.09088500
6 -0.73843100 3.22337900 0.25536800
6 0.55550600 3.89752000 0.14460900
6 3.01068700 5.32487700 0.23693600
6 1.82638500 5.98981200 0.13842600
6 1.81616900 3.18290400 0.05215600
6 3.05065000 3.89415700 0.16474900
6 5.53663900 1.03313700 -0.01400600
6 4.30160200 1.79245300 -0.01156100
6 3.07571600 1.09298400 -0.20272900
6 3.08079400 -0.36761000 -0.30421500
6 4.31082600 -1.07465100 -0.25501100
6 5.54129100 -0.31541800 -0.14081600
6 3.08517100 -3.19699700 -0.25398700
6 1.85799600 -2.48503800 -0.30316300
6 0.59045900 -3.21061200 -0.20051100
6 0.59735200 -4.62185900 -0.00830600
6 1.87232700 -5.31207200 -0.01098100
6 3.04261400 -4.64213200 -0.13879400
6 -1.84904500 -3.16395700 0.05575600
6 -3.09792800 -2.42895700 0.14826200
6 -4.29478200 -3.14276400 0.07638300
6 -4.27513200 -4.57534600 0.14438100
6 -3.10735600 -5.26889300 0.24284800
6 -1.84813600 -4.58858800 0.16945900
6 -3.16053000 -0.97116500 0.25775700
6 -4.38630400 -0.28898900 -0.08865200
6 -5.57737500 -1.08747100 -0.25718000
6 -5.54077900 -2.43373200 -0.10732900
6 4.26303400 3.17899900 0.13347400
6 1.88939800 1.81094300 -0.22746500
6 1.89340500 -1.09370400 -0.33844100
6 4.28675400 -2.47582100 -0.25117700
6 -0.62431000 -2.54198900 -0.22511600
6 -0.62279700 -5.28128800 0.13793700
6 -2.08923600 1.20696600 0.52998300
6 -3.24670600 1.87506000 0.02127400
6 -4.40832600 1.09734700 -0.19610600
6 -2.10547700 -0.19182500 0.70528500
6 -3.15392400 3.26972700 -0.19722000

```

6 -0.88573700 1.92039300 0.70394800  
1 -0.61200200 7.10372400 -0.19278500  
1 -2.75744000 5.93524000 -0.47717000  
1 3.94976200 5.87511500 0.32539500  
1 1.80971800 7.08193900 0.12904700  
1 6.47732700 1.57712100 0.09663000  
1 6.48614500 -0.86344100 -0.13028000  
1 1.87138500 -6.39866700 0.10031200  
1 3.98949600 -5.18664700 -0.12838700  
1 -5.22944600 -5.10668100 0.13588900  
1 -3.11469000 -6.35721600 0.33211200  
1 -6.51886200 -0.57833100 -0.47365400  
1 -6.45869100 -3.02037800 -0.18692800  
1 5.20147800 3.73321400 0.21851200  
1 0.97618400 1.29723400 -0.49836200  
1 0.95369500 -0.55075800 -0.32668600  
1 5.23251100 -3.02199000 -0.19994600  
1 -0.63635000 -1.49454200 -0.49702700  
1 -0.63377400 -6.37105900 0.22374700  
1 -5.34135400 1.59474000 -0.47298700  
1 -1.22712000 -0.65277300 1.15226600  
1 -4.05122900 3.82899800 -0.47411300  
1 -0.04679700 1.39046800 1.15029900

## 5. [12]kekulene [2,2,2,2,2]

E(wB97XD/cc-pVDZ) = -1843.21554423  
No imaginary frequency (B3LYP/6-31G\*)

6 -2.74773600 -1.75906700 0.63146800  
6 -1.40003400 -1.65137900 0.53128500  
6 -0.76041800 -0.40113700 0.17709600  
6 -1.58128800 0.73237600 -0.06871500  
6 -3.03532400 0.61610700 0.03918100  
6 -3.62178800 -0.62981700 0.38954700  
6 0.63049000 -0.26581200 0.06804200  
6 -0.97072300 1.93564200 -0.40888600  
6 0.40865500 2.08196000 -0.51973100  
6 1.23435400 0.95174500 -0.27521500  
6 2.66941700 1.10868200 -0.39201900  
1 3.30105800 0.23771300 -0.20352100  
6 3.23165700 2.29645800 -0.72527300  
6 2.42805800 3.47360100 -0.98254400  
6 1.01524000 3.36343700 -0.87899300  
1 1.26390500 -1.13673600 0.25658600  
1 -3.20203200 -2.71517800 0.90090600  
1 -0.76586900 -2.52057200 0.71950800  
1 -1.59858700 2.79907000 -0.59620600  
1 4.31737700 2.38476500 -0.80593200  
6 -8.30943600 3.80822500 -0.49245800  
6 -7.51762100 2.67804200 -0.24639900  
6 -6.10536900 2.79401400 -0.35136600  
6 -5.56202500 4.02821300 -0.69475300  
6 -8.07864600 1.39176300 0.11198600  
6 -5.25789600 1.62884300 -0.09965400  
6 -5.84976500 0.38531600 0.24993600  
6 -7.29305200 0.31192300 0.34600000  
6 -5.01736100 -0.71727000 0.48701100  
1 -5.47061200 -1.67506800 0.75624700  
6 -3.87157700 1.70366200 -0.19382700  
1 -9.16466900 1.30633400 0.19173200  
1 -9.39632100 3.72127900 -0.41235600  
1 -4.48434500 4.11436500 -0.77372600  
1 -7.74455600 -0.64568200 0.61481700

1 -3.42243100 2.65326800 -0.46128300  
6 2.98673000 4.71182700 -1.32828500  
6 2.19489300 5.84208700 -1.57406300  
6 0.78267400 5.72619500 -1.46872900  
6 0.23933700 4.49205000 -1.12508900  
6 2.75593000 7.12835400 -1.93243600  
6 -0.06480500 6.89141200 -1.72023500  
6 0.52708100 8.13495400 -2.06980600  
6 1.97034000 8.20827300 -2.16612100  
6 -0.30533300 9.23757500 -2.30681700  
1 0.14790500 10.19539300 -2.57602300  
6 -1.45113400 6.81661000 -1.62610900  
1 3.84193200 7.21371200 -2.01247900  
1 4.07356800 4.79868800 -1.40887800  
1 -0.83829200 4.40607600 -1.04548400  
1 2.42183700 9.16589800 -2.43488000  
1 -1.90029800 5.86692000 -1.35901700  
6 -7.75078000 5.04649900 -0.83809100  
6 -6.33792000 5.15675400 -0.94126600  
6 -5.73133500 6.43825100 -1.30056100  
6 -6.55706000 7.56844300 -1.54518500  
6 -7.99213600 7.41144600 -1.42861400  
6 -8.55439000 6.22362100 -1.09558400  
6 -4.35197100 6.58457800 -1.41144800  
6 -5.95321400 8.78599900 -1.88843700  
6 -4.56230200 8.92138900 -1.99735200  
6 -3.74141900 7.78790100 -1.75152200  
6 -2.28739300 7.90417900 -1.85925600  
6 -1.70094500 9.15012000 -2.20954200  
6 -2.57495400 10.27940300 -2.45135900  
6 -3.92267500 10.17167400 -2.35133800  
1 -3.72404200 5.72115100 -1.22431700  
1 -8.62376300 8.28241300 -1.61720200  
1 -9.64012800 6.13527200 -1.01514500  
1 -6.58663300 9.65689800 -2.07711300  
1 -2.12062400 11.23560300 -2.72037700  
1 -4.55683300 11.04088200 -2.53953200

## 6. [13]kekulene [1,3,2,2,2,3]

E(wB97XD/cc-pVDZ) = -1996.78772008  
No imaginary frequency (B3LYP/6-31G\*)

6 -0.00000000 6.34942400 0.00000000  
6 -1.24353800 7.06774800 0.12413000  
6 -2.43055400 6.42212700 0.24496400  
6 -2.50628600 4.98876400 0.12617600  
6 -1.27969400 4.26033800 -0.09618000  
6 0.00000000 4.95657700 0.00000000  
6 2.43055400 6.42212700 -0.24496300  
6 1.24353800 7.06774800 -0.12413000  
6 1.27969400 4.26033800 0.09618000  
6 2.50628600 4.98876400 -0.12617600  
6 6.21758700 -0.00929900 -0.08825600  
6 5.00154600 0.77781800 0.02688600  
6 3.76464200 0.08016500 0.27401400  
6 3.74458400 -1.38724700 0.22712400  
6 4.96388000 -2.10561400 0.10819800  
6 6.20387500 -1.35924600 -0.01981800  
6 3.71425000 -4.21123900 0.09416800  
6 2.49350200 -3.48806600 0.13612300  
6 1.22262800 -4.20922400 0.06521500  
6 1.22382000 -5.63138400 0.04005800



6 2.49176200 -6.32787700 0.04606100  
6 3.66838800 -5.65659200 0.05630600  
6 -1.22262800 -4.20922400 -0.06521500  
6 -2.49350200 -3.48806600 -0.13612300  
6 -3.71425000 -4.21123900 -0.09416800  
6 -3.66838800 -5.65659200 -0.05630600  
6 -2.49176200 -6.32787700 -0.04606100  
6 -1.22382000 -5.63138400 -0.04005800  
6 -3.76464200 0.08016500 -0.27401400  
6 -5.00154600 0.77781800 -0.02688600  
6 -6.21758700 -0.00929900 0.08825600  
6 -6.20387500 -1.35924600 0.01981800  
6 -4.96388000 -2.10561400 -0.10819800  
6 -3.74458400 -1.38724700 -0.22712400  
6 3.72720900 4.31562300 -0.15959000  
6 1.39401800 2.92282000 0.45097200  
6 2.60829500 2.22469800 0.36016100  
6 3.81059800 2.91916300 0.02129100  
6 5.00529000 2.15880400 -0.08938700  
6 2.62745300 0.81986800 0.50633500  
6 2.54832000 -2.09576000 0.22593200  
6 4.92470200 -3.50137400 0.07250900  
6 0.00000000 -3.54314200 0.00000000  
6 0.00000000 -6.30997800 -0.00000000  
6 -2.54832000 -2.09576000 -0.22593200  
6 -4.92470200 -3.50137400 -0.07250900  
6 -2.60829500 2.22469800 -0.36016100  
6 -3.81059800 2.91916300 -0.02129100  
6 -5.00529000 2.15880400 0.08938800  
6 -2.62745300 0.81986800 -0.50633500  
6 -3.72720900 4.31562300 0.15959000  
6 -1.39401800 2.92282000 -0.45097200  
1 -1.20578700 8.15872900 0.16143300  
1 -3.35496400 6.98354700 0.39560800  
1 3.35496400 6.98354700 -0.39560800  
1 1.20578700 8.15872900 -0.16143300  
1 7.16088700 0.52359800 -0.22694400  
1 7.13659300 -1.92210300 -0.09908800  
1 2.48139200 -7.41986000 0.02612900  
1 4.61374600 -6.20342300 0.04103600  
1 -4.61374600 -6.20342300 -0.04103600  
1 -2.48139200 -7.41986000 -0.02612900  
1 -7.16088700 0.52359800 0.22694400  
1 -7.13659300 -1.92210300 0.09908800  
1 4.64206200 4.88805000 -0.33311600  
1 0.52717500 2.36788500 0.79868700  
1 5.94659900 2.67572700 -0.29330300  
1 1.68493800 0.33255700 0.75740300  
1 1.61798600 -1.53737500 0.26802400  
1 5.86303300 -4.05817200 0.00384800  
1 0.00000000 -2.45784400 0.00000000  
1 0.00000000 -7.40322100 -0.00000000  
1 -1.61798600 -1.53737500 -0.26802400  
1 -5.86303300 -4.05817200 -0.00384800  
1 -5.94659900 2.67572700 0.29330400  
1 -1.68493800 0.33255700 -0.75740300  
1 -4.64206200 4.88805000 0.33311600  
1 -0.52717500 2.36788500 -0.79868700

6 -0.61424500 6.05836400 -0.00156400  
6 -1.88841600 6.75486000 0.00246300  
6 -3.06544500 6.08879600 0.00431800  
6 -3.12774400 4.63763900 0.00243300  
6 -1.88891900 3.90685400 -0.00154300  
6 -0.61578300 4.63766100 -0.00358500  
6 4.28255500 6.06150000 -0.01338500  
6 3.10827300 6.73957500 -0.00955900  
6 1.83616700 6.05140400 -0.00743800  
6 1.83069400 4.63189500 -0.00942600  
6 3.09595000 3.90130700 -0.01344400  
6 4.32254600 4.61576100 -0.01547200  
6 6.79381400 1.74182600 -0.02539700  
6 5.55361900 2.49709700 -0.02133300  
6 4.32399200 1.78540600 -0.01925500  
6 4.32766400 0.31739400 -0.02126100  
6 5.57999200 -0.39010800 -0.02530100  
6 6.80552900 0.38945400 -0.02724500  
6 3.12774400 -4.63763900 -0.02527800  
6 1.88891900 -3.90685300 -0.02122800  
6 0.61578300 -4.63766100 -0.01919900  
6 0.61424500 -6.05836400 -0.02129000  
6 1.88841500 -6.75486000 -0.02536400  
6 3.06544500 -6.08879500 -0.02721800  
6 -1.83069400 -4.63189500 -0.01336700  
6 -3.09595000 -3.90130700 -0.00935000  
6 -4.32254600 -4.61576100 -0.00743500  
6 -4.28255500 -6.06150000 -0.00958700  
6 -3.10827400 -6.73957500 -0.01338900  
6 -1.83616700 -6.05140400 -0.01543300  
6 -4.32766300 -0.31739400 -0.00151100  
6 -5.57999200 0.39010800 0.00244200  
6 -6.80552900 -0.38945400 0.00430100  
6 -6.79381400 -1.74182600 0.00242700  
6 -5.55361900 -2.49709700 -0.00157100  
6 -4.32399200 -1.78540600 -0.00353000  
6 0.60951600 6.73390400 -0.00354600  
6 0.60252700 3.97016500 -0.00748200  
6 5.52694700 3.89468900 -0.01937700  
6 3.13675100 2.50679600 -0.01535300  
6 3.15990500 -0.41510100 -0.01942200  
6 3.15676900 -1.82272900 -0.02136900  
6 4.39320200 -2.53656200 -0.02537900  
6 5.59146400 -1.77927600 -0.02724900  
6 1.93933100 -2.52931900 -0.01940700  
6 4.33654500 -3.95295800 -0.02724000  
6 -0.60252700 -3.97016500 -0.01527100  
6 -0.60951600 -6.73390400 -0.01934800  
6 -3.13675100 -2.50679600 -0.00735700  
6 -5.52694800 -3.89468900 -0.00357400  
6 -3.15676900 1.82272900 -0.00136800  
6 -4.39320200 2.53656200 0.00255500  
6 -5.59146300 1.77927600 0.00437200  
6 -3.15990500 0.41510100 -0.00328700  
6 -4.33654500 3.95295800 0.00437400  
6 -1.93933100 2.52931900 -0.00329800  
1 -1.87735800 7.84712300 0.00398400  
1 -4.00737000 6.64185500 0.00733200  
1 5.22984500 6.60528100 -0.01494400  
1 3.10563400 7.83184900 -0.00801800  
1 7.73421400 2.29751800 -0.02695200  
1 7.75544800 -0.14976400 -0.03029400  
1 1.87735800 -7.84712300 -0.02692800  
1 4.00737000 -6.64185500 -0.03027400  
1 -5.22984600 -6.60528000 -0.00809700  
1 -3.10563400 -7.83184900 -0.01497700  
1 -7.75544900 0.14976400 0.00730000  
1 -7.73421400 -2.29751800 0.00390900

7. [14]kekulene  
[2,2,3,2,2,3]

E(wB97XD/cc-pVDZ) = -2150.40684392  
No imaginary frequency (B3LYP/6-31G\*)

1 0.61235700 7.82721600 -0.00202300  
 1 0.59759200 2.88548700 -0.00913300  
 1 6.47236400 4.44377000 -0.02093100  
 1 2.19971900 1.96032800 -0.01368200  
 1 2.18874700 0.07852300 -0.01638100  
 1 6.55060000 -2.30374900 -0.03032200  
 1 1.02623700 -1.93509100 -0.01637500  
 1 5.27029200 -4.52138900 -0.03031100  
 1 -0.59759300 -2.88548700 -0.01358500  
 1 -0.61235700 -7.82721600 -0.02093100  
 1 -2.19971800 -1.96032900 -0.00890000  
 1 -6.47236400 -4.44376900 -0.00209900  
 1 -6.55060000 2.30374900 0.00737600  
 1 -2.18874600 -0.07852300 -0.00627700  
 1 -5.27029200 4.52138900 0.00738700  
 1 -1.02623700 1.93509100 -0.00626100

6 -2.49441000 -4.25723600 0.00224200  
 6 -3.73421100 -4.98718700 0.00184000  
 6 -3.67476400 -6.43765300 0.00286900  
 6 -2.49817100 -7.10474900 0.00418300  
 6 -1.22479100 -6.40849600 0.00478300  
 6 -3.76485400 -0.76367000 -0.00142300  
 6 -6.19617400 -2.12952500 -0.00198800  
 6 -4.99769000 -2.88554700 -0.00065300  
 6 -3.76090100 -2.17154600 -0.00038500  
 6 -2.54375500 -2.87909100 0.00101300  
 6 -4.94238200 -4.30151100 0.00043200  
 6 1.25392500 6.43112700 -0.00060900  
 6 -0.00000400 5.77106100 -0.00153400  
 6 -0.00000700 4.34294300 -0.00115700  
 6 1.22132100 3.64262700 0.00019500  
 6 -1.25393000 6.43113400 -0.00281000  
 6 -1.22134000 3.64263200 -0.00201200  
 6 0.00000900 -4.32512700 0.00473200  
 6 0.00000200 -7.08743600 0.00627300  
 1 8.34180700 1.94446500 0.00808200  
 1 8.36108900 -0.50441100 0.00961200  
 1 5.85498900 6.25246200 0.00352000  
 1 3.74394500 7.49358900 0.00118000  
 1 7.08445900 4.09018000 0.00575800  
 1 2.80496700 1.62063000 0.00365900  
 1 2.48730600 -8.19699500 0.00905900  
 1 4.61759800 -6.98912200 0.01025600  
 1 2.79421800 -0.26904200 0.00492100  
 1 7.15480200 -2.65487800 0.00989700  
 1 1.62999500 -2.28594900 0.00512200  
 1 5.87670900 -4.86895200 0.01011400  
 1 -8.34180900 1.94446200 -0.00608400  
 1 -8.36108500 -0.50441000 -0.00455900  
 1 -3.74395300 7.49360200 -0.00526500  
 1 -5.85499800 6.25247600 -0.00646800  
 1 -7.08446800 4.09018500 -0.00632700  
 1 -2.80496400 1.62065400 -0.00203000  
 1 -4.61759200 -6.98911200 0.00251800  
 1 -2.48730300 -8.19698600 0.00488200  
 1 -2.79421400 -0.26903300 -0.00118800  
 1 -7.15479500 -2.65487500 -0.00224600  
 1 -1.62999300 -2.28593300 0.00109300  
 1 -5.87669900 -4.86894600 0.00015000  
 1 1.27817900 7.52399500 -0.00099000  
 1 1.16465600 2.55469600 0.00034800  
 1 -1.27817900 7.52400300 -0.00317400  
 1 -1.16468600 2.55470000 -0.00170900  
 1 0.00001500 -3.24012700 0.00425800  
 1 -0.00000100 -8.18072800 0.00693500

8. [15]kekulene  
 [2,3,2,3,2,3]

E(wB97XD/cc-pVDZ) = -2304.00175841  
 No imaginary frequency (B3LYP/6-31G\*)

6 7.40138900 1.38885800 0.00763500  
 6 6.16174000 2.14346700 0.00610800  
 6 4.93257700 1.43565700 0.00552100  
 6 4.93360000 -0.03172100 0.00648300  
 6 6.18574600 -0.74041400 0.00794400  
 6 7.41208700 0.03635500 0.00848300  
 6 4.90362700 5.71580200 0.00295000  
 6 3.73769600 6.40134100 0.00164700  
 6 2.45179000 5.72767700 0.00077600  
 6 2.43948100 4.28897600 0.00130700  
 6 3.70974300 3.55442200 0.00300200  
 6 4.93725400 4.26493900 0.00371400  
 6 6.13759300 3.54364500 0.00522800  
 6 3.74504700 2.16256000 0.00400900  
 6 3.73422000 -4.98719700 0.00838400  
 6 2.49442100 -4.25724600 0.00692900  
 6 1.22320300 -4.99015800 0.00619900  
 6 1.22479800 -6.40850200 0.00696200  
 6 2.49817600 -7.10475900 0.00846700  
 6 3.67477100 -6.43766300 0.00913000  
 6 3.76485800 -0.76367900 0.00599900  
 6 3.76090600 -2.17155500 0.00683400  
 6 4.99769700 -2.88555400 0.00825700  
 6 6.19618000 -2.12953000 0.00879400  
 6 2.54376100 -2.87910200 0.00622100  
 6 4.94239100 -4.30151900 0.00901600  
 6 -4.93257700 1.43566700 -0.00348300  
 6 -6.16174300 2.14347400 -0.00470500  
 6 -7.40138900 1.38886000 -0.00510300  
 6 -7.41208400 0.03635700 -0.00426200  
 6 -6.18574200 -0.74041000 -0.00294200  
 6 -4.93359700 -0.03171200 -0.00261700  
 6 -2.45179900 5.72769000 -0.00357200  
 6 -3.73770400 6.40135400 -0.00484500  
 6 -4.90363700 5.71581500 -0.00550700  
 6 -4.93726500 4.26495200 -0.00492100  
 6 -3.70975400 3.55443700 -0.00372000  
 6 -2.43949300 4.28898900 -0.00310500  
 6 -6.13760000 3.54365300 -0.00541000  
 6 -3.74504900 2.16257600 -0.00303600  
 6 -1.22319000 -4.99015100 0.00391600

9. [16]kekulene  
 [2,3,3,2,3,3]

E(wB97XD/cc-pVDZ) = -2457.59860591  
 No imaginary frequency (B3LYP/6-31G\*)

6 -1.22443300 7.10656500 0.01807100  
 6 -2.49641500 7.80414600 0.02239600  
 6 -3.67334500 7.13765300 0.02486800  
 6 -3.73254700 5.68770200 0.02334400  
 6 -2.49511200 4.95650100 0.01906300  
 6 -1.22327300 5.68774200 0.01640100  
 6 3.67351500 7.13758500 0.00469700  
 6 2.49660100 7.80410000 0.00869400  
 6 1.22460200 7.10654300 0.01135000

6 1.22340700 5.68771900 0.00967400  
6 2.49522900 4.95645500 0.00532600  
6 3.73268200 5.68763300 0.00282700  
6 7.42634000 0.67501700 -0.01307300  
6 6.19386600 1.44845100 -0.00880200  
6 4.94388100 0.73608400 -0.00622600  
6 4.94386400 -0.73617400 -0.00788400  
6 6.19383200 -1.44856300 -0.01215100  
6 7.42632400 -0.67515000 -0.01464700  
6 3.73254700 -5.68770200 -0.01021800  
6 2.49511300 -4.95650200 -0.00594100  
6 1.22327300 -5.68774200 -0.00327700  
6 1.22443300 -7.10656600 -0.00493100  
6 2.49641500 -7.80414600 -0.00925100  
6 3.67334500 -7.13765300 -0.01173200  
6 -1.22340700 -5.68771800 0.00345400  
6 -2.49522900 -4.95645500 0.00780700  
6 -3.73268200 -5.68763300 0.01028600  
6 -3.67351500 -7.13758500 0.00841600  
6 -2.49660100 -7.80409900 0.00443700  
6 -1.22460200 -7.10654200 0.00178800  
6 -4.94386500 0.73617400 0.02101200  
6 -6.19383200 1.44856300 0.02527000  
6 -7.42632500 0.67515000 0.02775300  
6 -7.42634100 -0.67501700 0.02616900  
6 -6.19386600 -1.44845100 0.02191000  
6 -4.94388200 -0.73608400 0.01935900  
6 0.00009300 7.78536800 0.01550700  
6 0.00005900 5.02243600 0.01224700  
6 4.94269700 5.00298000 -0.00126100  
6 2.54713100 3.57678600 0.00354500  
6 3.76477100 2.87280700 -0.00057800  
6 4.99909800 3.58923400 -0.00307500  
6 6.20135700 2.83447900 -0.00721400  
6 3.77447500 1.46200600 -0.00224500  
6 3.77444000 -1.46207500 -0.00544600  
6 3.76470300 -2.87287600 -0.00704100  
6 4.99901300 -3.58932500 -0.01129700  
6 6.20129000 -2.83459100 -0.01375600  
6 2.54704600 -3.57683400 -0.00447400  
6 4.94257900 -5.00307000 -0.01277400  
6 -0.00005800 -5.02243600 0.00086300  
6 -0.00009300 -7.78536800 -0.00236400  
6 -2.54713100 -3.57678600 0.00961500  
6 -3.76477100 -2.87280700 0.01372600  
6 -4.99909800 -3.58923400 0.01619000  
6 -4.94269700 -5.00298000 0.01436500  
6 -3.77447500 -1.46200600 0.01540500  
6 -6.20135800 -2.83447900 0.02031500  
6 -3.76470300 2.87287600 0.02016400  
6 -4.99901300 3.58932400 0.02441900  
6 -6.20129000 2.83459100 0.02687400  
6 -3.77444100 1.46207500 0.01857100  
6 -4.94257800 5.00307000 0.02589900  
6 -2.54704700 3.57683400 0.01759800  
1 -2.48463200 8.89637900 0.02363900  
1 -4.61599500 7.68942300 0.02810800  
1 4.61617900 7.68933800 0.00278100  
1 2.48484600 8.89633300 0.01001500  
1 8.37182400 1.22203200 -0.01502100  
1 8.37179500 -1.22218100 -0.01787200  
1 2.48463300 -8.89637900 -0.01048400  
1 4.61599500 -7.68942300 -0.01497000  
1 -4.61617900 -7.68933800 0.01032000  
1 -2.48484600 -8.89633200 0.00312100  
1 -8.37179600 1.22218100 0.03097100  
1 -8.37182500 -1.22203200 0.02810200  
1 0.00010700 8.87868400 0.01679800

1 0.00004400 3.93721600 0.01096400  
1 5.87608700 5.57199400 -0.00311700  
1 1.63388700 2.98261200 0.00532200  
1 7.15842300 3.36271900 -0.00920300  
1 2.80632900 0.96186900 -0.00023100  
1 2.80630800 -0.96192000 -0.00215300  
1 7.15834300 -3.36284700 -0.01699900  
1 1.63381600 -2.98264600 -0.00124400  
1 5.87595500 -5.57210000 -0.01600900  
1 -0.00004300 -3.93721600 0.00211300  
1 -0.00010700 -8.87868400 -0.00364900  
1 -1.63388700 -2.98261100 0.00787100  
1 -5.87608700 -5.57199400 0.01620700  
1 -2.80633000 -0.96186800 0.01342200  
1 -7.15842300 -3.36271900 0.02228500  
1 -7.15834300 3.36284700 0.03011100  
1 -2.80630800 0.96192000 0.01527300  
1 -5.87595500 5.57210000 0.02913600  
1 -1.63381600 2.98264500 0.01437400

## 10. [17]kekulene [2,3,3,3,2,4]

E(wB97XD/cc-pVDZ) = -2611.19024584  
No imaginary frequency (B3LYP/6-31G\*)

6 -0.64715100 7.48585700 -0.00000000  
6 -1.91848500 8.19004000 0.00000000  
6 -3.09802800 7.53141000 -0.00000000  
6 -3.16782100 6.07988800 -0.00000000  
6 -1.92630400 5.33777200 -0.00000000  
6 -0.64980100 6.06727700 -0.00000000  
6 4.24960200 7.50738400 -0.00000000  
6 3.07367100 8.17571900 0.00000000  
6 1.80150900 7.47948700 -0.00000000  
6 1.79713600 6.06190800 -0.00000000  
6 3.06707800 5.32800400 -0.00000000  
6 4.30563600 6.05774200 -0.00000000  
6 7.99651000 1.04603300 -0.00000000  
6 6.76344700 1.81769100 -0.00000000  
6 5.51333300 1.10500400 -0.00000000  
6 5.51480500 -0.36719800 -0.00000000  
6 6.76464200 -1.07689200 -0.00000000  
6 7.99703900 -0.30403100 -0.00000000  
6 4.31523800 -5.32100100 0.00000000  
6 3.07570300 -4.59365200 0.00000000  
6 1.80011100 -5.32844500 0.00000000  
6 1.80789200 -6.76733900 0.00000000  
6 3.09275400 -7.44937500 0.00000000  
6 4.26219000 -6.77475200 0.00000000  
6 -3.08011400 -5.32038300 0.00000000  
6 -4.35055800 -4.58730700 0.00000000  
6 -5.57606500 -5.29976800 0.00000000  
6 -5.54314700 -6.74956200 -0.00000000  
6 -4.37653900 -7.43400500 0.00000000  
6 -3.09299900 -6.75790900 0.00000000  
6 -5.58479200 -1.00040800 0.00000000  
6 -6.84835000 -0.29633200 0.00000000  
6 -8.07045200 -1.08254300 0.00000000  
6 -8.05098800 -2.43335600 -0.00000000  
6 -6.80550100 -3.18223000 0.00000000  
6 -5.57823100 -2.47066200 0.00000000  
6 0.57714600 8.16131000 -0.00000000  
6 0.57054000 5.39932100 -0.00000000  
6 5.51461700 5.37157000 -0.00000000

```

6 3.11713900 3.94789400 -0.00000000
6 4.33406100 3.24224600 -0.00000000
6 5.56902000 3.95807600 -0.00000000
6 6.77096600 3.20356700 -0.00000000
6 4.34365100 1.83116300 -0.00000000
6 4.34536600 -1.09619900 -0.00000000
6 4.33901500 -2.50575000 0.00000000
6 5.57412600 -3.21866800 0.00000000
6 6.77393300 -2.46398900 -0.00000000
6 3.12174000 -3.21643200 0.00000000
6 5.52096500 -4.63513700 0.00000000
6 0.58667200 -4.67816400 0.00000100
6 -0.64032300 -5.37504700 0.00000100
6 -0.64297100 -6.80250300 0.00000000
6 0.61129400 -7.46651000 0.00000000
6 -1.85979100 -4.67383900 0.00000100
6 -1.89438400 -7.46195700 0.00000000
6 -4.38963200 -3.19370200 0.00000100
6 -6.77865100 -4.58022900 0.00000000
6 -4.42571400 1.15193100 0.00000000
6 -5.67683800 1.86280900 0.00000000
6 -6.87183900 1.08537800 0.00000000
6 -4.42574000 -0.26481500 0.00000000
6 -3.21031400 3.25758700 0.00000000
6 -4.45160000 3.98547600 0.00000000
6 -5.65829200 3.26705800 0.00000000
6 -3.22680600 1.86350900 0.00000000
6 -4.37608600 5.40915400 0.00000000
6 -1.98355000 3.96620700 -0.00000000
1 -1.90028000 9.28220200 0.00000000
1 -4.03755100 8.08848800 0.00000000
1 5.19333400 8.05728800 0.00000000
1 3.06319600 9.26796000 0.00000000
1 8.94144100 1.59397500 0.00000000
1 8.94247000 -0.85112500 0.00000000
1 3.09075600 -8.54169000 -0.00000000
1 5.20869000 -7.31999800 -0.00000000
1 -6.49436200 -7.28647900 -0.00000000
1 -4.38108300 -8.52625900 -0.00000000
1 -9.02264700 -0.54740600 0.00000000
1 -8.98768400 -2.99525600 -0.00000000
1 0.57985300 9.25463000 0.00000000
1 0.56788100 4.31393600 -0.00000100
1 6.44882300 5.93923300 0.00000000
1 2.20288100 3.35518600 -0.00000100
1 7.72801600 3.73182200 0.00000000
1 3.37557500 1.33074900 -0.00000100
1 3.37648900 -0.59736000 -0.00000000
1 7.73181600 -2.99076000 0.00000000
1 2.20474100 -2.62754700 0.00000000
1 6.45625900 -5.20103100 -0.00000000
1 0.53679200 -3.58949700 0.00000100
1 0.63210000 -8.55947500 -0.00000000
1 -1.80353700 -3.58573200 0.00000100
1 -1.91902700 -8.55484100 -0.00000000
1 -3.45057400 -2.64926200 0.00000100
1 -7.72422100 -5.12905900 -0.00000000
1 -7.83517200 1.60204300 0.00000000
1 -3.45134800 -0.75225100 0.00000000
1 -6.60495300 3.81352000 0.00000000
1 -2.28020300 1.31710000 0.00000000
1 -5.30527600 5.98495000 0.00000000
1 -1.07388300 3.36652900 0.00000000

```

```

E(wB97XD/cc-pVDZ) = -2764.79161826
No imaginary frequency (B3LYP/6-31G*)
6 8.63687500 0.67507200 -0.00871600
6 7.40409100 1.44630400 -0.00732700
6 6.15433200 0.73594100 -0.00640600
6 6.15432900 -0.73592000 -0.00691100
6 7.40408600 -1.44628600 -0.00835400
6 8.63687200 -0.67505900 -0.00920000
6 4.90345700 7.14322500 -0.00398500
6 3.73424500 7.81836100 -0.00308900
6 2.44987700 7.13639600 -0.00194500
6 2.44022400 5.69895800 -0.00167100
6 3.71481100 4.96301100 -0.00299600
6 4.95489100 5.68996000 -0.00406500
6 7.41275700 2.83341700 -0.00692300
6 6.21284600 3.58737400 -0.00562600
6 4.97756800 2.87434000 -0.00469200
6 4.98439100 1.46473000 -0.00511500
6 6.16033100 5.00356000 -0.00529500
6 3.76047500 3.58543900 -0.00340800
6 4.95486800 -5.68993400 -0.00802400
6 3.71478700 -4.96298500 -0.00649900
6 2.44019600 -5.69893700 -0.00575300
6 2.44985500 -7.13637700 -0.00675300
6 3.73422400 -7.81833600 -0.00826900
6 4.90343400 -7.14319800 -0.00882400
6 4.98438600 -1.46470600 -0.00607800
6 4.97755700 -2.87431600 -0.00666300
6 6.21283200 -3.58735200 -0.00813700
6 7.41274600 -2.83340000 -0.00892400
6 3.76046100 -3.58541200 -0.00587200
6 6.16031100 -5.00353800 -0.00877600
6 -6.15433300 0.73591900 0.00328800
6 -7.40408900 1.44628700 0.00335100
6 -8.63687600 0.67505900 0.00316700
6 -8.63687900 -0.67507100 0.00271700
6 -7.40409500 -1.44630300 0.00236500
6 -6.15433600 -0.73594000 0.00276400
6 -2.44985300 7.13637300 0.00167800
6 -3.73422400 7.81833300 0.00208300
6 -4.90343300 7.14319500 0.00266900
6 -4.95486600 5.68993000 0.00299200
6 -3.71478500 4.96298100 0.00289600
6 -2.44019300 5.69893400 0.00215900
6 -4.97755700 2.87431300 0.00353300
6 -6.21283200 3.58735000 0.00349500
6 -7.41274800 2.83340000 0.00350000
6 -4.98438800 1.46470200 0.00351100
6 -6.16031000 5.00353600 0.00332400
6 -3.76046000 3.58540600 0.00331400
6 -2.44022100 -5.69895500 -0.00195500
6 -3.71480900 -4.96300700 -0.00065700
6 -4.95488900 -5.68995600 -0.00093000
6 -4.90345600 -7.14322000 -0.00208000
6 -3.73424500 -7.81835600 -0.00304200
6 -2.44987600 -7.13639300 -0.00313100
6 -4.98439400 -1.46472700 0.00241300
6 -7.41276000 -2.83341600 0.00156000
6 -6.21284700 -3.58737100 0.00100300
6 -4.97756900 -2.87433800 0.00146200
6 -3.76047400 -3.58543500 0.00070200
6 -6.16033100 -5.00355800 -0.00090000
6 1.25281100 7.83724100 -0.00106200
6 0.00001200 7.17478700 0.00010700
6 0.00001800 5.74846500 0.00060000
6 1.22430700 5.04985500 -0.00022600
6 -1.25279400 7.83722800 0.00073500

```

11. [18]kekulene  
[3,3,3,3,3,3]

```

6 -1.22426600 5.04984500 0.00168800
6 1.22427100 -5.04984800 -0.00417600
6 -0.00001300 -5.74846600 -0.00369900
6 -0.00001000 -7.17478700 -0.00480000
6 1.25279400 -7.83723000 -0.00626200
6 -1.22430100 -5.04985500 -0.00227600
6 -1.25281100 -7.83723900 -0.00445900
1 9.58171100 1.22312400 -0.00938500
1 9.58170700 -1.22311400 -0.01026300
1 5.85049600 7.68746600 -0.00476800
1 3.73213600 8.91064700 -0.00316200
1 8.37028000 3.36076200 -0.00765400
1 4.01574500 0.96550300 -0.00439800
1 7.09593800 5.56886200 -0.00609700
1 2.84330400 2.99690500 -0.00283600
1 3.73212000 -8.91062200 -0.00895600
1 5.85047400 -7.68743800 -0.00995400
1 4.01574200 -0.96547600 -0.00495400
1 8.37026600 -3.36074800 -0.01003600
1 2.84329800 -2.99687000 -0.00479900
1 7.09591500 -5.56884300 -0.00993900
1 -9.58171100 1.22311600 0.00336400
1 -9.58171600 -1.22312400 0.00255200
1 -3.73211900 8.91061900 0.00183300
1 -5.85047400 7.68743300 0.00288900
1 -8.37026800 3.36075000 0.00352500
1 -4.01574400 0.96546900 0.00352300
1 -7.09591400 5.56884100 0.00336800
1 -2.84329700 2.99686300 0.00334600
1 -5.85049600 -7.68746000 -0.00213500
1 -3.73213800 -8.91064200 -0.00386400
1 -4.01574800 -0.96549800 0.00270500
1 -8.37028200 -3.36076200 0.00125500
1 -2.84330500 -2.99689900 0.00113900
1 -7.09593700 -5.56886000 -0.00032900
1 1.27469500 8.93015800 -0.00130500
1 1.17303200 3.96130400 0.00027600
1 -1.27468700 8.93014500 0.00037300
1 -1.17297400 3.96129700 0.00198800
1 1.17298200 -3.96129900 -0.00327800
1 1.27468500 -8.93014700 -0.00705900
1 -1.17302400 -3.96130500 -0.00155700
1 -1.27469700 -8.93015600 -0.00534900

```

```

6 6.16450300 -1.40565700 -0.00000000
6 7.41254100 -2.11961600 0.00000000
6 8.65005500 -1.35244700 0.00000000
6 4.95437500 -6.35685400 0.00000000
6 3.71611800 -5.62830700 0.00000000
6 2.44057700 -6.36264400 0.00000000
6 2.44937500 -7.80021100 0.00000000
6 3.73258300 -8.48391400 0.00000000
6 4.90230800 -7.80991100 0.00000000
6 -2.44057700 -6.36264400 0.00000000
6 -3.71611800 -5.62830700 0.00000000
6 -4.95437500 -6.35685400 0.00000000
6 -4.90230800 -7.80991100 0.00000000
6 -3.73258300 -8.48391400 0.00000000
6 -2.44937500 -7.80021100 0.00000000
6 -6.16845600 0.06865100 -0.00000100
6 -7.42990300 0.77740500 0.00000000
6 -8.65811200 -0.00344000 0.00000100
6 -8.65005500 -1.35244700 0.00000000
6 -7.41254100 -2.11961600 0.00000000
6 -6.16450300 -1.40565700 -0.00000000
6 0.00000000 9.23018800 0.00000100
6 0.00000000 6.46883500 -0.00000100
6 4.94834700 6.47315100 0.00000000
6 2.55618000 5.03028600 -0.00000100
6 3.78265300 4.32229900 -0.00000100
6 5.02258600 5.05105200 -0.00000000
6 6.23120400 4.33350800 0.00000000
6 3.80223000 2.92612400 -0.00000200
6 5.00163600 2.21789900 -0.00000100
6 6.25084000 2.93168200 -0.00000000
6 7.44958100 2.15645400 0.00000000
6 5.00799600 0.79830900 -0.00000100
6 4.99362900 -2.13057100 -0.00000000
6 4.98232000 -3.54176200 -0.00000000
6 6.21558200 -4.25719100 0.00000000
6 7.41815800 -3.50502400 0.00000000
6 3.76426200 -4.24997500 -0.00000000
6 6.16132300 -5.67209400 0.00000000
6 1.22486600 -5.71272100 0.00000000
6 0.00000000 -6.41080800 0.00000000
6 0.00000000 -7.83732300 0.00000000
6 1.25215900 -8.50036100 0.00000000
6 -1.22486600 -5.71272100 0.00000000
6 -1.25215900 -8.50036100 0.00000000
6 -3.76426200 -4.24997500 -0.00000000
6 -4.98232000 -3.54176200 -0.00000000
6 -6.21558200 -4.25719100 0.00000000
6 -6.16132300 -5.67209400 0.00000000
6 -4.99362900 -2.13057100 -0.00000000
6 -7.41815800 -3.50502400 0.00000000
6 -5.00163600 2.21789900 -0.00000100
6 -6.25084000 2.93168200 -0.00000000
6 -7.44958100 2.15645400 0.00000000
6 -5.00799600 0.79830900 -0.00000100
6 -3.78265300 4.32229900 -0.00000100
6 -5.02258600 5.05105200 -0.00000000
6 -6.23120400 4.33350800 0.00000000
6 -3.80223000 2.92612400 -0.00000200
6 -4.94834700 6.47315100 0.00000000
6 -2.55618000 5.03028600 -0.00000100
6 -2.47690500 10.34777000 0.00000200
1 -4.61392800 9.15097900 0.00000200
1 4.61392800 9.15097900 0.00000200
1 2.47690500 10.34777000 0.00000200
1 9.60627900 0.53888200 0.00000100
1 9.59196700 -1.90559600 0.00000100
1 3.72929700 -9.57621100 0.00000000

```

## 12. [19]kekulene [2,4,3,3,3,4]

E(wB97XD/cc-pVDZ) = -2918.37919837  
No imaginary frequency (B3LYP/6-31G\*)

```

6 -1.22400300 8.55182900 0.00000100
6 -2.49461300 9.25561600 0.00000100
6 -3.67339900 8.59563400 0.00000100
6 -3.73997100 7.14468000 0.00000000
6 -2.49889200 6.40314000 -0.00000100
6 -1.22374500 7.13423100 -0.00000000
6 3.67339900 8.59563400 0.00000100
6 2.49461300 9.25561600 0.00000100
6 1.22400300 8.55182900 0.00000100
6 1.22374500 7.13423100 -0.00000000
6 2.49889200 6.40314000 -0.00000100
6 3.73997100 7.14468000 0.00000000
6 8.65811200 -0.00344000 0.00000100
6 7.42990300 0.77740500 0.00000000
6 6.16845600 0.06865100 -0.00000100

```

```

1 5.84892100 -8.35492400 0.00000000
1 -5.84892100 -8.35492400 0.00000000
1 -3.72929700 -9.57621100 0.00000000
1 -9.60627900 0.53888200 0.00000100
1 -9.59196700 -1.90559600 0.00000100
1 0.00000000 10.32351000 0.00000200
1 0.00000000 5.38320100 -0.00000200
1 5.87778200 7.04854400 0.00000100
1 1.64601400 4.43119800 -0.00000200
1 7.17698600 4.88148900 0.00000100
1 2.85655400 2.37810800 -0.00000200
1 8.41104800 2.67658600 0.00000100
1 4.03634000 0.30478100 -0.00000200
1 4.02633400 -1.62833100 -0.00000000
1 8.37439800 -4.03476500 0.00000000
1 2.84778100 -3.66015900 -0.00000000
1 7.09593100 -6.23911000 0.00000000
1 1.17462100 -4.62400500 0.00000000
1 1.27358200 -9.59331600 0.00000000
1 -1.17462100 -4.62400500 0.00000000
1 -1.27358200 -9.59331600 0.00000000
1 -2.84778100 -3.66015900 -0.00000000
1 -7.09593100 -6.23911000 0.00000000
1 -4.02633400 -1.62833100 -0.00000000
1 -8.37439800 -4.03476500 0.00000000
1 -8.41104800 2.67658600 0.00000100
1 -4.03634000 0.30478100 -0.00000200
1 -7.17698600 4.88148900 0.00000100
1 -2.85655400 2.37810800 -0.00000200
1 -5.87778200 7.04854400 0.00000100
1 -1.64601400 4.43119800 -0.00000200

```

```

6 -5.51075700 -8.19505200 0.00003400
6 -4.34165700 -8.87013300 0.00003100
6 -3.05828900 -8.18726000 0.00002500
6 -6.77314900 -0.31602000 0.00002400
6 -8.03441400 0.39127400 0.00002700
6 -9.26268000 -0.38907100 0.00003300
6 -9.25449800 -1.73802100 0.00003500
6 -8.01676000 -2.50428100 0.00003200
6 -6.76856000 -1.79027300 0.00002700
6 0.60959000 8.22791500 -0.00001700
6 -0.64283200 8.89333100 -0.00001300
6 -0.62080900 6.10623000 -0.00000900
6 0.60710000 6.80199300 -0.00001400
6 1.86138900 8.88920700 -0.00002200
6 1.83001200 6.10204300 -0.00001700
6 6.76720700 6.05649000 -0.00003400
6 4.36897100 4.63600900 -0.00002400
6 5.58653500 3.92676700 -0.00002700
6 6.82022900 4.64174800 -0.00003200
6 8.02253100 3.88961100 -0.00003500
6 5.59763000 2.51544900 -0.00002400
6 5.61264400 -0.41522500 -0.00001900
6 5.60796800 -1.83412100 -0.00001700
6 6.85731600 -2.54572100 -0.00002000
6 8.05484500 -1.77083900 -0.00002500
6 4.40847300 -2.54582000 -0.00001100
6 4.39216200 -3.94046500 -0.00000900
6 5.63318900 -4.66645700 -0.00001200
6 6.83933900 -3.94901200 -0.00001700
6 3.16587300 -4.65420200 -0.00000300
6 5.56116500 -6.09104800 -0.00000900
6 0.62080900 -6.10623000 0.00000800
6 -0.60710000 -6.80199300 0.00001400
6 -0.60959000 -8.22791500 0.00001700
6 0.64283200 -8.89333100 0.00001400
6 -1.83001200 -6.10204300 0.00001700
6 -1.86138900 -8.88920700 0.00002200
6 -4.36897100 -4.63600900 0.00002300
6 -5.58653500 -3.92676700 0.00002600
6 -6.82022900 -4.64174800 0.00003200
6 -6.76720700 -6.05649000 0.00003400
6 -5.59763000 -2.51544900 0.00002400
6 -8.02253100 -3.88961100 0.00003500
6 -5.60796800 1.83412100 0.00001600
6 -6.85731600 2.54572100 0.00002000
6 -8.05484500 1.77083900 0.00002500
6 -5.61264400 0.41522500 0.00001900
6 -4.39216200 3.94046500 0.00000800
6 -5.63318900 4.66645700 0.00001200
6 -6.83933900 3.94901200 0.00001700
6 -4.40847300 2.54582000 0.00001100
6 -5.56116500 6.09104800 0.00000900
6 -3.16587300 4.65420200 0.00000300
1 -3.11379400 9.97696700 -0.00000600
1 -5.23843500 8.76714300 0.00000300
1 6.45801000 8.73893600 -0.00003800
1 4.33915000 9.96242700 -0.00003200
1 10.19615500 2.29158500 -0.00003900
1 10.21074200 -0.15342300 -0.00003500
1 3.11379400 -9.97696700 0.00000700
1 5.23843500 -8.76714300 -0.00000300
1 -6.45801000 -8.73893600 0.00003800
1 -4.33915000 -9.96242700 0.00003300
1 -10.21074200 0.15342300 0.00003500
1 -10.19615500 -2.29158500 0.00003900
1 -0.66210600 9.98633100 -0.00001500
1 -0.57279200 5.01731500 -0.00000700
1 1.88430500 9.98213300 -0.00002400

```

### 13. [20]kekulene [3,3,4,3,3,4]

E(wB97XD/cc-pVDZ) = -3071.97647329  
No imaginary frequency (B3LYP/6-31G\*)

```

6 -1.83980200 8.19588800 -0.00000800
6 -3.12231800 8.88467600 -0.00000400
6 -4.29463100 8.21727700 0.00000100
6 -4.35629500 6.76336500 0.00000300
6 -3.11313800 6.02484200 0.00000000
6 -1.83411600 6.75797500 -0.00000600
6 5.51075700 8.19505200 -0.00003300
6 4.34165700 8.87013300 -0.00003100
6 3.05828900 8.18726000 -0.00002500
6 3.04747300 6.75046300 -0.00002300
6 4.32194500 6.01457300 -0.00002600
6 5.56089300 6.74219900 -0.00003100
6 9.25449800 1.73802100 -0.00003500
6 8.01676000 2.50428100 -0.00003200
6 6.76856000 1.79027300 -0.00002700
6 6.77314900 0.31602000 -0.00002400
6 8.03441400 -0.39127400 -0.00002700
6 9.26268000 0.38907100 -0.00003300
6 4.35629500 -6.76336500 -0.00000300
6 3.11313800 -6.02484200 -0.00000000
6 1.83411600 -6.75797500 0.00000500
6 1.83980200 -8.19588800 0.00000800
6 3.12231800 -8.88467600 0.00000500
6 4.29463100 -8.21727700 -0.00000000
6 -3.04747300 -6.75046300 0.00002200
6 -4.32194500 -6.01457300 0.00002600
6 -5.56089300 -6.74219900 0.00003100

```

1 1.77839200 5.01336200 -0.00001600  
 1 7.70230900 6.62268200 -0.00003800  
 1 3.45189600 4.04707100 -0.00001900  
 1 8.97881700 4.41925900 -0.00003900  
 1 4.63032700 2.01315200 -0.00002000  
 1 4.64067200 0.07777700 -0.00001700  
 1 9.01664000 -2.29037000 -0.00002700  
 1 3.46187300 -1.99940700 -0.00000900  
 1 7.78600300 -4.49548000 -0.00001900  
 1 2.25265700 -4.05936400 -0.00000100  
 1 6.49207400 -6.66406800 -0.00001100  
 1 0.57279200 -5.01731500 0.00000600  
 1 0.66210600 -9.98633100 0.00001600  
 1 -1.77839200 -5.01336200 0.00001500  
 1 -1.88430500 -9.98213300 0.00002400  
 1 -3.45189600 -4.04707100 0.00001900  
 1 -7.70230900 -6.62268200 0.00003800  
 1 -4.63032700 -2.01315200 0.00002000  
 1 -8.97881700 -4.41925900 0.00003900  
 1 -9.01664000 2.29037000 0.00002700  
 1 -4.64067200 -0.07777700 0.00001600  
 1 -7.78600300 4.49548000 0.00001900  
 1 -3.46187300 1.99940700 0.00000900  
 1 -6.49207400 6.66406800 0.00001100  
 1 -2.25265700 4.05936400 0.00000100

6 6.16744900 -6.44025200 0.00601600  
 6 -7.37665300 1.44062300 -0.00349100  
 6 -8.62516200 2.15259300 -0.00283000  
 6 -9.86236900 1.38601600 -0.00215800  
 6 -9.86954100 0.03707800 -0.00187100  
 6 -8.64064300 -0.74168200 -0.00229800  
 6 -7.37962200 -0.03357700 -0.00333400  
 6 -3.67840600 7.85520000 -0.00193600  
 6 -4.96736600 8.52997300 -0.00151800  
 6 -6.13193800 7.84919000 -0.00189700  
 6 -6.17710800 6.39443100 -0.00266000  
 6 -4.93624400 5.66940000 -0.00331300  
 6 -3.66114500 6.40913000 -0.00306100  
 6 -6.19750400 3.57876000 -0.00376000  
 6 -7.43187000 4.29124300 -0.00307300  
 6 -8.63251200 3.53858600 -0.00269600  
 6 -6.20608400 2.16815200 -0.00401000  
 6 -7.38089900 5.70741400 -0.00260900  
 6 -4.98044900 4.29191700 -0.00391200  
 6 -2.44118900 -7.11007200 0.00097500  
 6 -3.71929700 -6.37554500 -0.00008700  
 6 -4.96306200 -7.11338600 0.00075200  
 6 -4.90314400 -8.56705900 0.00190000  
 6 -3.73136000 -9.23536900 0.00234500  
 6 -2.44881400 -8.54722700 0.00203100  
 6 -6.21859000 -0.76447300 -0.00393800  
 6 -8.66026300 -2.12124000 -0.00169300  
 6 -7.46247000 -2.89530900 -0.00197100  
 6 -6.21321400 -2.18347700 -0.00321500  
 6 -5.01364300 -2.89534800 -0.00339800  
 6 -7.44461500 -4.29848300 -0.00095400  
 6 -6.23855800 -5.01586300 -0.00093100  
 6 -4.99732300 -4.29015300 -0.00215600  
 6 -3.77134200 -5.00463400 -0.00179000  
 6 -6.16747700 -6.44028300 0.00032400  
 6 2.49339300 8.56181300 0.00085400  
 6 1.22421800 7.91124600 -0.00040100  
 6 1.21619300 6.47343000 -0.00167100  
 6 2.44788000 5.76884100 -0.00127500  
 6 0.00001000 8.59718600 -0.00043200  
 6 -1.22419200 7.91123700 -0.00151900  
 6 -1.21615700 6.47342200 -0.00283900  
 6 0.00002000 5.79031400 -0.00300000  
 6 -2.49337300 8.56179600 -0.00124800  
 6 -2.44784100 5.76882600 -0.00366000  
 6 1.22600900 -6.45977000 0.00246900  
 6 -0.00002000 -7.15735500 0.00222400  
 6 -0.00001400 -8.58260800 0.00308500  
 6 1.25202600 -9.24634500 0.00417900  
 6 -1.22605500 -6.45978300 0.00122000  
 6 -1.25204800 -9.24635900 0.00298700  
 1 10.80416800 1.93930000 0.00608700  
 1 10.81688500 -0.50658800 0.00728200  
 1 7.08201100 8.38819900 0.00310700  
 1 4.97037500 9.62227300 0.00265700  
 1 9.58937700 4.06716300 0.00463100  
 1 5.23812800 1.66726700 0.00329000  
 1 8.31726500 6.27151500 0.00361400  
 1 4.06214300 3.70489900 0.00219000  
 1 3.72315700 -10.32759500 0.00645100  
 1 5.84760900 -9.11564000 0.00739100  
 1 5.24683700 -0.27110000 0.00131200  
 1 9.62156000 -2.64157700 0.00720800  
 1 4.06704400 -2.34894700 0.00111500  
 1 8.39124300 -4.84487300 0.00729600  
 1 2.85786800 -4.41018600 0.00138900  
 1 7.09886100 -7.01238000 0.00724500  
 1 -10.80415900 1.93928900 -0.00180600

14. [21]kekulene  
[3,4,3,4,3,4]

E(wB97XD/cc-pVDZ) = -3225.56881307  
 No imaginary frequency (B3LYP/6-31G\*)

6 9.86237500 1.38603200 0.00563000  
 6 8.62517200 2.15261400 0.00448400  
 6 7.37665900 1.44064800 0.00392300  
 6 7.37962300 -0.03355100 0.00407300  
 6 8.64064100 -0.74166300 0.00555600  
 6 9.86954100 0.03709300 0.00627500  
 6 6.13196300 7.84922000 0.00252800  
 6 4.96738800 8.53000100 0.00226200  
 6 3.67843100 7.85522500 0.00128400  
 6 3.66117500 6.40915500 0.00050800  
 6 4.93627100 5.66943000 0.00162100  
 6 6.17713400 6.39446100 0.00231900  
 6 8.63252800 3.53860700 0.00416900  
 6 7.43188800 4.29126800 0.00335200  
 6 6.19752000 3.57878900 0.00299200  
 6 6.20609400 2.16818100 0.00338100  
 6 7.38092300 5.70744000 0.00309300  
 6 4.98046800 4.29194900 0.00221500  
 6 4.96303200 -7.11335100 0.00541000  
 6 3.71926700 -6.37551100 0.00382700  
 6 2.44115300 -7.11004400 0.00350800  
 6 2.44878500 -8.54720100 0.00443400  
 6 3.73133300 -9.23533600 0.00577800  
 6 4.90311400 -8.56702400 0.00629400  
 6 6.21858900 -0.76444300 0.00281200  
 6 6.21320700 -2.18344700 0.00339900  
 6 7.46245900 -2.89528400 0.00518300  
 6 8.66025500 -2.12122100 0.00607800  
 6 5.01363300 -2.89531400 0.00245300  
 6 4.99730500 -4.29011900 0.00336200  
 6 6.23853700 -5.01583200 0.00513300  
 6 7.44459700 -4.29845900 0.00595000  
 6 3.77132300 -5.00459700 0.00273000

```

1 -10.81688500 -0.50660300 -0.00128200
1 -4.97035400 9.62224400 -0.00085400
1 -7.08198800 8.38816600 -0.00155000
1 -9.58935900 4.06714600 -0.00217200
1 -5.23812100 1.66723400 -0.00447200
1 -8.31723900 6.27149100 -0.00208300
1 -4.06213000 3.70485900 -0.00435500
1 -5.84763900 -9.11567400 0.00233300
1 -3.72318000 -10.32762800 0.00311800
1 -5.24683500 -0.27113300 -0.00484400
1 -9.62157000 -2.64159300 -0.00088100
1 -4.06705000 -2.34898700 -0.00431600
1 -8.39126600 -4.84489200 -0.00002400
1 -2.85788100 -4.41022900 -0.00283500
1 -7.09889200 -7.01240800 0.00099900
1 2.52324700 9.65450900 0.00148800
1 2.38995000 4.68053100 -0.00241300
1 0.00000500 9.69022300 0.00054800
1 0.00002400 4.69735400 -0.00397100
1 -2.52323300 9.65449000 -0.00037400
1 -2.38989900 4.68051800 -0.00464500
1 1.17653100 -5.37096000 0.00186400
1 1.27252000 -10.33928400 0.00491300
1 -1.17659600 -5.37097000 0.00077900
1 -1.27253300 -10.33929800 0.00379800

```

15. [22]kekulene  
[3,4,4,3,4,4]

E(wB97XD/cc-pVDZ) = -3379.16164989  
No imaginary frequency (B3LYP/6-31G\*)

```

6 -2.44839500 9.24596900 -0.00000700
6 -3.73024300 9.93520800 -0.00000300
6 -4.90231500 9.26760800 0.00000200
6 -4.96258900 7.81401000 0.00000400
6 -3.72001900 7.07518300 0.00000000
6 -2.44129700 7.80873700 -0.00000500
6 4.90241200 9.26755700 -0.00003200
6 3.73034700 9.93516900 -0.00002900
6 2.44849200 9.24594400 -0.00002400
6 2.44137900 7.80871100 -0.00002200
6 3.72009400 7.07514400 -0.00002600
6 4.96267000 7.81395800 -0.00003000
6 9.88284100 0.67401800 -0.00003400
6 8.65005500 1.44932300 -0.00003200
6 7.39031600 0.73806300 -0.00002800
6 7.39030800 -0.73814000 -0.00002500
6 8.65004000 -1.44941400 -0.00002700
6 9.88283400 -0.67412100 -0.00003200
6 4.96258900 -7.81401000 -0.00000300
6 3.72001900 -7.07518300 -0.00000100
6 2.44129700 -7.80873700 0.00000500
6 2.44839500 -9.24596900 0.00000800
6 3.73024300 -9.93520800 0.00000600
6 4.90231500 -9.26760800 0.00000000
6 -2.44137900 -7.80871100 0.00002200
6 -3.72009400 -7.07514400 0.00002500
6 -4.96267000 -7.81395800 0.00003200
6 -4.90241200 -9.26755700 0.00003500
6 -3.73034700 -9.93516900 0.00003200
6 -2.44849200 -9.24594400 0.00002500
6 -7.39030800 0.73814000 0.00002400
6 -8.65004000 1.44941400 0.00002800
6 -9.88283400 0.67412100 0.00003500

```

```

6 -9.88284100 -0.67401800 0.00003700
6 -8.65005500 -1.44932300 0.00003300
6 -7.39031600 -0.73806300 0.00002600
6 0.00004900 9.28060400 -0.00001600
6 -1.25158900 9.94469500 -0.00001200
6 -1.22633400 7.15796000 -0.00000900
6 0.00004100 7.85522400 -0.00001400
6 1.25169300 9.94468200 -0.00002100
6 1.22640900 7.15794700 -0.00001800
6 6.16791900 7.14190000 -0.00003300
6 3.77360500 5.70383500 -0.00002500
6 5.00017900 4.99106200 -0.00002700
6 6.24001500 5.71826200 -0.00003200
6 7.44769100 5.00218300 -0.00003400
6 5.01913800 3.59527900 -0.00002600
6 6.21943500 2.88620100 -0.00002800
6 7.46717700 3.60027300 -0.00003200
6 8.66719300 2.82747800 -0.00003400
6 6.22863500 1.46581500 -0.00002600
6 6.22861900 -1.46588000 -0.00002100
6 6.21940500 -2.88626600 -0.00001800
6 7.46713900 -3.60035100 -0.00002000
6 8.66716300 -2.82756900 -0.00002500
6 5.01910100 -3.59533200 -0.00001400
6 5.00012700 -4.99111400 -0.00001000
6 6.23995500 -5.71832700 -0.00001200
6 7.44763900 -5.00226100 -0.00001700
6 3.77354500 -5.70387400 -0.00000500
6 6.16784500 -7.14196500 -0.00000800
6 1.22633400 -7.15796000 0.00000700
6 -0.00004100 -7.85522400 0.00001300
6 -0.00004900 -9.28060400 0.00001700
6 1.25158900 -9.94469500 0.00001400
6 -1.22640900 -7.15794700 0.00001600
6 -1.25169300 -9.94468200 0.00002300
6 -3.77360500 -5.70383500 0.00002100
6 -5.00017900 -4.99106100 0.00002500
6 -6.24001500 -5.71826200 0.00003200
6 -6.16791900 -7.14190000 0.00003500
6 -5.01913800 -3.59527900 0.00002200
6 -6.21943500 -2.88620100 0.00002500
6 -7.46717700 -3.60027300 0.00003200
6 -7.44769100 -5.00218300 0.00003500
6 -6.22863500 -1.46581500 0.00002200
6 -8.66719300 -2.82747800 0.00003600
6 -6.21940500 2.88626600 0.00001500
6 -7.46713900 3.60035100 0.00002000
6 -8.66716300 2.82756900 0.00002600
6 -6.22861900 1.46588000 0.00001700
6 -5.00012700 4.99111400 0.00000700
6 -6.23995500 5.71832700 0.00001200
6 -7.44763900 5.00226100 0.00001800
6 -5.01910100 3.59533200 0.00000900
6 -6.16784500 7.14196500 0.00001000
6 -3.77354500 5.70387400 0.00000200
1 -3.72141600 11.02748600 -0.00000400
1 -5.84651300 9.81677600 0.00000500
1 5.84661500 9.81671500 -0.00003500
1 3.72153200 11.02744700 -0.00003000
1 10.82773100 1.22205200 -0.00003700
1 10.82771800 -1.22216500 -0.00003300
1 3.72141600 -11.02748600 0.00000800
1 5.84651300 -9.81677600 -0.00001000
1 -5.84661500 -9.81671500 0.00004000
1 -3.72153200 -11.02744700 0.00003400
1 -10.82771800 1.22216500 0.00003800
1 -10.82773100 -1.22205200 0.00004200
1 -1.27188500 11.03767500 -0.00001300

```



1 -1.17751900 6.06901500 -0.00000800  
 1 1.27200000 11.03766100 -0.00002200  
 1 1.17758300 6.06900300 -0.00001600  
 1 7.09865200 7.71519900 -0.00003600  
 1 2.86045600 5.10879700 -0.00002200  
 1 8.39349800 5.55012900 -0.00003700  
 1 4.07339700 3.04735000 -0.00002300  
 1 9.62757300 3.34962000 -0.00003800  
 1 5.25799800 0.96989400 -0.00002300  
 1 5.25798800 -0.96994900 -0.00002000  
 1 9.62753800 -3.34972100 -0.00002600  
 1 4.07336600 -3.04739300 -0.00001200  
 1 8.39344000 -5.55021700 -0.00001800  
 1 2.86040300 -5.10882600 -0.00000400  
 1 7.09857200 -7.71527300 -0.00001000  
 1 1.17751900 -6.06901500 0.00000500  
 1 1.27188500 -11.03767500 0.00001600  
 1 -1.17758300 -6.06900300 0.00001300  
 1 -1.27200000 -11.03766100 0.00002500  
 1 -2.86045600 -5.10879700 0.00001600  
 1 -7.09865200 -7.71519900 0.00004000  
 1 -4.07339700 -3.04735000 0.00001600  
 1 -8.39349800 -5.55012900 0.00004100  
 1 -5.25799800 -0.96989400 0.00001700  
 1 -9.62757300 -3.34962000 0.00004100  
 1 -9.62753800 3.34972100 0.00002900  
 1 -5.25798800 0.96994900 0.00001400  
 1 -8.39344000 5.55021700 0.00002100  
 1 -4.07336600 3.04739300 0.00000600  
 1 -7.09857200 7.71527300 0.00001300  
 1 -2.86040300 5.10882600 -0.00000100

6 -4.62857900 -5.56694200 0.00491500  
 6 -3.90707700 -6.76716000 -0.00000400  
 6 -2.50691900 -6.79182800 -0.00493100  
 6 -4.00133600 -1.84485600 0.01004100  
 6 -4.67838300 -0.62246900 0.01491000  
 6 -6.09916300 -0.63882700 0.01993300  
 6 -6.76884600 -1.87272400 0.01984400  
 6 -6.07909900 -3.08717500 0.01498700  
 6 -4.65457500 -3.07136400 0.00996200  
 6 4.67672100 -1.86553400 -0.01993100  
 6 3.96675000 -0.64809200 -0.01495400  
 6 2.54991900 -0.68531400 -0.01002900  
 6 1.86853900 -1.86518100 -0.01002400  
 6 2.54450800 -3.11097500 -0.01495000  
 6 3.95394300 -3.11723700 -0.01993700  
 6 -1.86853900 1.86518100 0.01002400  
 6 -2.54450800 3.11097500 0.01495000  
 6 -3.95394300 3.11723700 0.01993700  
 6 -4.67672100 1.86553400 0.01993100  
 6 -3.96675000 0.64809200 0.01495400  
 6 -2.54991900 0.68531400 0.01002900  
 6 -3.93362600 5.57029700 0.02492300  
 6 -4.62045800 4.39771500 0.02492200  
 6 1.75438900 8.02953200 0.01007900  
 6 0.40048400 8.03719800 0.01482500  
 6 6.76039600 4.36556800 -0.01484000  
 6 6.07672200 5.53418100 -0.01007100  
 6 4.62045800 -4.39771500 -0.02492200  
 6 3.93362600 -5.57029700 -0.02492300  
 6 -1.75438900 -8.02953200 -0.01007900  
 6 -0.40048400 -8.03719800 -0.01482500  
 6 -6.76039600 -4.36556800 0.01484000  
 6 -6.07672200 -5.53418100 0.01007100  
 6 6.79107700 -0.62149600 -0.02490900  
 6 6.11889400 -1.80255600 -0.02489700  
 6 -6.11889400 1.80255600 0.02489700  
 6 -6.79107700 0.62149600 0.02490900  
 1 -2.30165000 7.74911800 0.02367600  
 1 0.13199800 3.44436500 0.00615000  
 1 4.45370400 7.71393700 0.00000100  
 1 1.98285200 3.43437100 0.00002700  
 1 7.86199800 1.88146400 -0.02370300  
 1 2.91729400 1.83632500 -0.00612100  
 1 -0.13199800 -3.44436500 -0.00615000  
 1 2.30165000 -7.74911800 -0.02367600  
 1 -1.98285200 -3.43437100 -0.00002700  
 1 -4.45370400 -7.71393700 -0.00000100  
 1 -2.91729400 -1.83632500 0.00612100  
 1 -7.86199800 -1.88146400 0.02370200  
 1 1.97381300 0.23721800 -0.00613800  
 1 0.78163200 -1.82682700 -0.00611400  
 1 -0.78163200 1.82682700 0.00611300  
 1 -1.97381300 -0.23721800 0.00613700  
 1 -4.47575400 6.51834300 0.02878300  
 1 -5.70884800 4.43662600 0.02884800  
 1 2.30907700 8.97044400 0.01006300  
 1 -0.14382600 8.98411200 0.01866200  
 1 7.85260700 4.36773400 -0.01870200  
 1 6.61420500 6.48502900 -0.01005700  
 1 5.70884800 -4.43662600 -0.02884800  
 1 4.47575400 -6.51834300 -0.02878300  
 1 -2.30907700 -8.97044400 -0.01006300  
 1 0.14382600 -8.98411200 -0.01866200  
 1 -7.85260700 -4.36773500 0.01870200  
 1 -6.61420500 -6.48502900 0.01005700  
 1 7.88317700 -0.61703400 -0.02877000  
 1 6.69681700 -2.72564000 -0.02878100  
 1 -6.69681700 2.72564000 0.02878100

## 16. [16]clarene

<2,2,4,2,2,4>

E(wB97XD/cc-pVDZ) = -2457.62359521  
 No imaginary frequency (B3LYP/6-31G\*)

6 0.33267800 5.56643200 0.00996900  
 6 -0.36595100 6.80798600 0.01497600  
 6 -1.76256900 6.79810400 0.01983600  
 6 -2.49623300 5.60114400 0.01993300  
 6 -1.79996100 4.36253300 0.01491100  
 6 -0.40279300 4.38738900 0.01004700  
 6 4.62857900 5.56694200 -0.00491500  
 6 3.90707700 6.76716000 0.00000400  
 6 2.50691900 6.79182800 0.00493100  
 6 1.79749000 5.56090700 0.00490200  
 6 2.52524300 4.37368800 0.00002200  
 6 3.91728300 4.33712400 -0.00487500  
 6 6.76884600 1.87272400 -0.01984400  
 6 6.07909900 3.08717500 -0.01498700  
 6 4.65457500 3.07136400 -0.00996200  
 6 4.00133600 1.84485600 -0.01004100  
 6 4.67838300 0.62246900 -0.01491000  
 6 6.09916300 0.63882700 -0.01993300  
 6 2.49623300 -5.60114400 -0.01993300  
 6 1.79996100 -4.36253300 -0.01491100  
 6 0.40279300 -4.38738900 -0.01004800  
 6 -0.33267800 -5.56643200 -0.00996900  
 6 0.36595100 -6.80798600 -0.01497600  
 6 1.76256900 -6.79810400 -0.01983600  
 6 -1.79749000 -5.56090700 -0.00490200  
 6 -2.52524300 -4.37368800 -0.00002200  
 6 -3.91728300 -4.33712400 0.00487500

1 -7.88317700 0.61703400 0.02877000

## 17. [18]clarene

<2,4,2,4,2,4>

E(wB97XD/cc-pVDZ) = -2764.82661608  
No imaginary frequency (B3LYP/6-31G\*)

6 7.83617400 1.25431800 -0.00499800  
6 7.14943600 2.46914300 -0.00472100  
6 5.72466200 2.45785800 -0.00482500  
6 5.06878700 1.23317400 -0.00524000  
6 5.74362700 0.00807700 -0.00556400  
6 7.16398200 0.02153200 -0.00539800  
6 5.71300800 4.95676600 -0.00403000  
6 5.00423600 6.15889000 -0.00368200  
6 3.60050300 6.19292600 -0.00372200  
6 2.87870400 4.96952300 -0.00414000  
6 3.60232500 3.77255600 -0.00452800  
6 4.99091500 3.72850200 -0.00446800  
6 3.56327000 -6.21457400 -0.00681700  
6 2.86472700 -4.97778100 -0.00677100  
6 1.46631500 -5.00579200 -0.00683100  
6 0.73364000 -6.18616200 -0.00694200  
6 1.43630800 -7.42569600 -0.00702400  
6 2.83174800 -7.41310800 -0.00696100  
6 5.74072400 -2.47979200 -0.00610500  
6 5.03116200 -1.26190700 -0.00600800  
6 3.61408100 -1.29954400 -0.00636500  
6 2.93261900 -2.47959700 -0.00665700  
6 3.60837000 -3.72580100 -0.00660800  
6 5.01797000 -3.73148600 -0.00639400  
6 -5.06878700 1.23317400 -0.00524000  
6 -5.72466200 2.45785800 -0.00482500  
6 -7.14943600 2.46914300 -0.00472100  
6 -7.83617400 1.25431800 -0.00499800  
6 -7.16398200 0.02153200 -0.00539800  
6 -5.74362700 0.00807700 -0.00556400  
6 -2.87870400 4.96952400 -0.00414000  
6 -3.60050300 6.19292600 -0.00372200  
6 -5.00423600 6.15889000 -0.00368200  
6 -5.71300800 4.95676600 -0.00403000  
6 -4.99091500 3.72850200 -0.00446800  
6 -3.60232500 3.77255600 -0.00452800  
6 -0.73364000 -6.18616200 -0.00694200  
6 -1.46631500 -5.00579200 -0.00683100  
6 -2.86472700 -4.97778100 -0.00677100  
6 -3.56327000 -6.21457400 -0.00681700  
6 -2.83174800 -7.41310800 -0.00696100  
6 -1.43630800 -7.42569600 -0.00702400  
6 -2.93261900 -2.47959700 -0.00665700  
6 -3.61408100 -1.29954400 -0.00636500  
6 -5.03116200 -1.26190700 -0.00600800  
6 -5.74072400 -2.47979200 -0.00610500  
6 -5.01797000 -3.73148600 -0.00639400  
6 -3.60837000 -3.72580100 -0.00660800  
6 1.42263900 4.98750000 -0.00414300  
6 0.72268200 6.21102800 -0.00377600  
6 -0.72268200 6.21102800 -0.00377600  
6 -1.42263900 4.98750000 -0.00414300  
6 -0.68135700 3.77919300 -0.00447900  
6 0.68135600 3.77919300 -0.00447900  
6 7.85545100 -1.23842100 -0.00560200  
6 7.18249000 -2.41890700 -0.00590200  
6 7.83833600 3.74448100 -0.00429100

6 7.16191700 4.91584700 -0.00396600  
6 -0.67632800 -8.65996500 -0.00714000  
6 0.67632800 -8.65996500 -0.00714000  
6 5.68608500 -5.01057700 -0.00645300  
6 5.00012500 -6.18354400 -0.00667300  
6 -7.16191700 4.91584700 -0.00396600  
6 -7.83833600 3.74448100 -0.00429100  
6 -1.49628200 7.42918400 -0.00339300  
6 -2.85508900 7.42170400 -0.00335700  
6 -5.68608500 -5.01057700 -0.00645300  
6 -5.00012500 -6.18354400 -0.00667300  
6 -7.85545100 -1.23842100 -0.00560200  
6 -7.18249000 -2.41890700 -0.00590200  
6 2.85508900 7.42170400 -0.00335700  
6 1.49628200 7.42918400 -0.00339300  
1 8.92935000 1.26075700 -0.00487900  
1 3.98444600 1.22705600 -0.00525900  
1 5.55630100 7.10243000 -0.00336000  
1 3.05508800 2.83631200 -0.00489600  
1 0.92953700 -4.06356700 -0.00674700  
1 3.37275300 -8.36303600 -0.00700200  
1 3.03806900 -0.37686000 -0.00645000  
1 1.84562300 -2.44150900 -0.00694900  
1 -3.98444600 1.22705600 -0.00525900  
1 -8.92935000 1.26075600 -0.00487900  
1 -5.55630100 7.10243000 -0.00336000  
1 -3.05508800 2.83631200 -0.00489700  
1 -0.92953700 -4.06356700 -0.00674700  
1 -3.37275300 -8.36303600 -0.00700200  
1 -1.84562300 -2.44150900 -0.00694900  
1 -3.03806900 -0.37686000 -0.00645000  
1 -1.19224700 2.81896300 -0.00472000  
1 1.19224700 2.81896300 -0.00472000  
1 8.94755500 -1.23422100 -0.00548100  
1 7.75957700 -3.34244900 -0.00600800  
1 8.93054900 3.73970700 -0.00422700  
1 7.70378600 5.86417300 -0.00363800  
1 -1.22664200 -9.60341400 -0.00721900  
1 1.22664200 -9.60341400 -0.00721900  
1 6.77446200 -5.04848700 -0.00631800  
1 5.54247100 -7.13146800 -0.00671400  
1 -7.70378600 5.86417300 -0.00363800  
1 -8.93054900 3.73970700 -0.00422700  
1 -0.98493900 8.39069600 -0.00311100  
1 -3.40482200 8.36536100 -0.00304400  
1 -6.77446200 -5.04848700 -0.00631800  
1 -5.54247100 -7.13146800 -0.00671400  
1 -8.94755500 -1.23422100 -0.00548100  
1 -7.75957700 -3.34244900 -0.00600800  
1 3.40482200 8.36536100 -0.00304400  
1 0.98493900 8.39069600 -0.00311100

## 18. [20]clarene

<2,2,6,2,2,6>

E(wB97XD/cc-pVDZ) = -3072.03428393  
No imaginary frequency (B3LYP/6-31G\*)

6 1.40777500 7.42583600 0.01301100  
6 0.71502700 8.67136800 0.03060500  
6 -0.68042400 8.66953800 0.04221500  
6 -1.42073500 7.47724000 0.03433300  
6 -0.73236900 6.23369200 0.00967500  
6 0.66589000 6.25039500 0.00112400  
6 5.70404600 7.42201200 -0.00964900

6 4.98337700 8.62181000 0.00003100  
6 3.58400400 8.64686800 0.01021100  
6 2.87309200 7.41646700 0.00756800  
6 3.60051400 6.22844800 0.00103800  
6 4.99303100 6.19175000 -0.00595600  
6 7.85284800 3.73854900 -0.04074200  
6 7.15786300 4.94861300 -0.02942300  
6 5.73286100 4.92694700 -0.01095200  
6 5.08473900 3.69737400 0.00216600  
6 5.76818500 2.47740200 -0.00615500  
6 7.18932900 2.50184200 -0.03176200  
6 1.42273300 -7.47723400 -0.02842800  
6 0.73437000 -6.23369100 -0.00338400  
6 -0.66389000 -6.25039400 0.00517400  
6 -1.40577600 -7.42583200 -0.00706300  
6 -0.71302900 -8.67136100 -0.02493500  
6 0.68242100 -8.66953000 -0.03656700  
6 -2.87109300 -7.41646500 -0.00173800  
6 -3.59851500 -6.22844600 0.00486900  
6 -4.99103300 -6.19174900 0.01173900  
6 -5.70204900 -7.42201100 0.01519100  
6 -4.98137900 -8.62180800 0.00541700  
6 -3.58200600 -8.64686500 -0.00463400  
6 -5.08274000 -3.69737300 0.00397700  
6 -5.76618800 -2.47740200 0.01226200  
6 -7.18733700 -2.50184300 0.03754300  
6 -7.85085800 -3.73855100 0.04629300  
6 -7.15587100 -4.94861400 0.03500100  
6 -5.73086500 -4.92694700 0.01679900  
6 5.78742200 -0.00628800 -0.01517900  
6 5.06706700 1.20165000 0.00777000  
6 3.64746200 1.14778000 0.04549700  
6 2.97651200 -0.03652100 0.05362700  
6 3.66440400 -1.28092300 0.02280000  
6 5.07544200 -1.26672700 -0.00998100  
6 3.63248700 -3.76408800 -0.00914000  
6 2.94009600 -2.53454400 0.02317900  
6 1.51845600 -2.55984000 0.05433600  
6 0.82737100 -3.73248800 0.04701700  
6 1.48964400 -4.98932000 0.00975600  
6 2.89598700 -5.01036900 -0.01354900  
6 -2.97449600 0.03651500 -0.04672500  
6 -3.66239500 1.28091800 -0.01611800  
6 -5.07344100 1.26672600 0.01628300  
6 -5.78542400 0.00628800 0.02135300  
6 -5.06506500 -1.20165100 -0.00142400  
6 -3.64545000 -1.14778500 -0.03877100  
6 -0.82535300 3.73247400 -0.03986700  
6 -1.48763800 4.98931600 -0.00317500  
6 -2.89398600 5.01037000 0.01983700  
6 -3.63048500 3.76408800 0.01550900  
6 -2.93808500 2.53453800 -0.01640900  
6 -1.51643400 2.55982500 -0.04709000  
6 -2.85702500 7.46006700 0.05144700  
6 -3.55258700 6.29283500 0.04682600  
6 2.83675400 9.88730400 0.02419900  
6 1.48361500 9.89886300 0.03567800  
6 7.83762800 6.22746800 -0.03557800  
6 7.15189300 7.39403600 -0.02430500  
6 3.55458400 -6.29282900 -0.04092800  
6 2.85902200 -7.46005900 -0.04569300  
6 -2.83475500 -9.88729800 -0.01880400  
6 -1.48161600 -9.89885500 -0.03026600  
6 -7.83563600 -6.22747000 0.04091900  
6 -7.14989800 -7.39403700 0.02965000  
6 7.89151500 1.24874900 -0.04866400  
6 7.22738500 0.06335000 -0.04303300  
6 5.74481000 -2.53146900 -0.03940800

6 5.06248800 -3.71236900 -0.03897300  
6 -7.22539300 -0.06335100 0.04888900  
6 -7.88952500 -1.24874900 0.05435100  
6 -5.06049300 3.71237200 0.04498700  
6 -5.74281500 2.53147200 0.04541200  
1 -1.21410700 9.62346300 0.05841200  
1 1.19499800 5.30375300 -0.01422200  
1 5.53030400 9.56841800 -0.00039200  
1 3.05790300 5.28880500 0.00134500  
1 8.94582100 3.75235900 -0.05765400  
1 4.00040100 3.68355000 0.01840700  
1 -1.19299700 -5.30375700 0.02077300  
1 1.21610400 -9.62345000 -0.05301500  
1 -3.05590300 -5.28880400 0.00466400  
1 -5.52830600 -9.56841600 0.00563200  
1 -3.99839800 -3.68354700 -0.01200700  
1 -8.94383500 -3.75236200 0.06298500  
1 3.06361700 2.06541500 0.07152900  
1 1.88994600 -0.00741700 0.08479100  
1 0.95102400 -1.63267000 0.08502300  
1 -0.25921100 -3.68490700 0.07341400  
1 -1.88792200 0.00740700 -0.07762300  
1 -3.06160000 -2.06542100 -0.06465100  
1 0.26123900 3.68488600 -0.06585700  
1 -0.94899100 1.63264600 -0.07730100  
1 -3.39068400 8.41268500 0.07017000  
1 -4.64057200 6.33868600 0.06235200  
1 3.39509700 10.82602800 0.02681000  
1 0.94118200 10.84676100 0.04792000  
1 8.92974900 6.23087700 -0.04846800  
1 7.68641700 8.34652900 -0.02769500  
1 4.64256600 -6.33867600 -0.05662600  
1 3.39267600 -8.41267300 -0.06469100  
1 -3.39309900 -10.82602200 -0.02159600  
1 -0.93918300 -10.84675000 -0.04268400  
1 -8.92775900 -6.23088200 0.05363000  
1 -7.68442300 -8.34653000 0.03286700  
1 8.98333600 1.26195900 -0.06810100  
1 7.81029600 -0.85644400 -0.05836700  
1 6.83284600 -2.56908900 -0.06489700  
1 5.63863500 -4.63608900 -0.06402900  
1 -7.80830700 0.85644300 0.06412800  
1 -8.98135000 -1.26195900 0.07355900  
1 -5.63664700 4.63609600 0.06976000  
1 -6.83085800 2.56909600 0.07061300

19. [22]clarene  
<2,4,4,4,2,6>

E(wB97XD/cc-pVDZ) = -3379.23436325  
No imaginary frequency (B3LYP/6-31G\*)

6 0.24081000 8.09825600 0.00617200  
6 -0.45416900 9.34295600 0.00690000  
6 -1.84871900 9.34069600 0.00616700  
6 -2.58899400 8.14784700 0.00474800  
6 -1.89983500 6.90517100 0.00402700  
6 -0.50023500 6.92284100 0.00474900  
6 4.53820600 8.11336000 0.00852000  
6 3.80996500 9.31305200 0.00915100  
6 2.41515500 9.32889400 0.00839800  
6 1.70865100 8.09126300 0.00694700  
6 2.43875100 6.90849100 0.00632600  
6 3.83764900 6.87755600 0.00706100  
6 8.83643700 0.67006300 0.00464700

6 8.15468300 1.89172200 0.00525600  
6 6.73072100 1.89382200 0.00448300  
6 6.06505100 0.66718900 0.00314300  
6 6.73316900 -0.55785300 0.00248900  
6 8.15716200 -0.55276600 0.00328100  
6 4.55839000 -6.78651400 -0.00379100  
6 3.85065800 -5.55085800 -0.00322200  
6 2.45564900 -5.58461600 -0.00403500  
6 1.72621200 -6.77447000 -0.00539400  
6 2.44020000 -8.00655500 -0.00593800  
6 3.83907000 -7.98622300 -0.00513000  
6 -4.03652600 -6.76187100 -0.00847400  
6 -4.76321500 -5.56612200 -0.00792600  
6 -6.15259800 -5.52579300 -0.00859300  
6 -6.87097200 -6.75648900 -0.00990200  
6 -6.15945000 -7.95628500 -0.01044100  
6 -4.75634500 -7.98661300 -0.00974500  
6 -6.24544600 -3.02880100 -0.00666100  
6 -6.92987100 -1.80785400 -0.00602200  
6 -8.35063300 -1.83246800 -0.00678600  
6 -9.01350400 -3.07003400 -0.00812100  
6 -8.31820800 -4.27889400 -0.00871900  
6 -6.89280900 -4.25826200 -0.00797400  
6 6.71673900 4.38355600 0.00654100  
6 5.99204300 5.63257400 0.00720400  
6 4.58193700 5.62518700 0.00638500  
6 3.91003400 4.37745600 0.00489100  
6 4.59516500 3.19815900 0.00428200  
6 6.01183500 3.16354300 0.00511200  
6 6.72449000 -3.04816600 0.00046100  
6 6.01675900 -1.82930600 0.00102600  
6 4.60091200 -1.86767000 0.00011900  
6 3.91868700 -3.04938100 -0.00124200  
6 4.59346200 -4.29468500 -0.00180300  
6 6.00295800 -4.29805100 -0.00097000  
6 0.26715000 -6.78703500 -0.00624100  
6 -0.47145300 -5.57765800 -0.00582400  
6 -1.83533700 -5.57422900 -0.00655600  
6 -2.57976500 -6.78005700 -0.00776100  
6 -1.88088200 -8.00482100 -0.00826800  
6 -0.43683400 -8.00768300 -0.00750600  
6 -4.14056900 0.70858400 -0.00240300  
6 -4.82997100 1.95252900 -0.00175000  
6 -6.24129800 1.93767000 -0.00254700  
6 -6.95226300 0.67637300 -0.00398900  
6 -6.23041500 -0.53139500 -0.00459600  
6 -4.81046800 -0.47626600 -0.00376700  
6 -1.99308200 4.40394600 0.00188800  
6 -2.65546800 5.66117500 0.00257200  
6 -4.06244500 5.68239600 0.00182700  
6 -4.79915600 4.43596200 0.00035900  
6 -4.10618800 3.20643400 -0.00029500  
6 -2.68420200 3.23137300 0.00051600  
6 -4.02500000 8.13161200 0.00397700  
6 -4.72114600 6.96457800 0.00258400  
6 1.66253100 10.56731400 0.00907000  
6 0.31048500 10.57397200 0.00837000  
6 8.83940400 3.15674300 0.00666400  
6 8.16030400 4.33157400 0.00728100  
6 6.67695100 -5.57605300 -0.00159900  
6 5.99652600 -6.74993000 -0.00293500  
6 -4.01199700 -9.21569000 -0.01025500  
6 -2.65388400 -9.22337900 -0.00954600  
6 -9.00181100 -5.55673000 -0.01007100  
6 -8.31979900 -6.72416800 -0.01062300  
6 6.66071600 6.91137700 0.00870100  
6 5.97480900 8.08357800 0.00931600  
6 8.84460900 -1.81651500 0.00265800

6 8.16823200 -2.99273100 0.00134300  
6 0.33022900 -9.23170300 -0.00800300  
6 1.68721200 -9.23211100 -0.00728100  
6 -8.39199600 0.60568600 -0.00482900  
6 -9.05461800 -0.58071900 -0.00614900  
6 -6.22946700 4.38370400 -0.00048600  
6 -6.91138800 3.20239400 -0.00186400  
1 -2.38274500 10.29453400 0.00671100  
1 0.02964100 5.97637100 0.00415800  
1 4.35322400 10.26166000 0.01027200  
1 1.89990300 5.96703500 0.00524200  
1 9.92954800 0.67115500 0.00526400  
1 4.98082300 0.66595400 0.00261800  
1 1.91500900 -4.64471000 -0.00355300  
1 4.38466600 -8.93342400 -0.00554400  
1 -4.21830000 -4.62814300 -0.00692100  
1 -6.70903400 -8.90124000 -0.01142700  
1 -5.16088200 -3.01465300 -0.00610100  
1 -10.10657100 -3.08451500 -0.00870300  
1 2.82293300 4.33699200 0.00418100  
1 4.02147200 2.27383700 0.00310900  
1 4.02449300 -0.94501900 0.00047400  
1 2.83148300 -3.01140300 -0.00190700  
1 0.04198900 -4.61859100 -0.00492200  
1 -2.34428900 -4.61274500 -0.00620200  
1 -3.05365800 0.68017600 -0.00181200  
1 -4.22546000 -1.39344400 -0.00420300  
1 -0.90627900 4.35600300 0.00247400  
1 -2.11646900 2.30400900 0.00005300  
1 -4.55796100 9.08479500 0.00452800  
1 -5.80921000 7.01055800 0.00204600  
1 2.21843000 11.50744600 0.01017200  
1 -0.23618600 11.51949700 0.00890400  
1 9.93147200 3.15766700 0.00724200  
1 8.73145100 5.25859200 0.00834800  
1 7.76526900 -5.60957700 -0.00099200  
1 6.54131200 -7.69640500 -0.00337200  
1 -4.56257700 -10.15882400 -0.01122100  
1 -2.14288500 -10.18486000 -0.00996400  
1 -10.09400100 -5.55628500 -0.01063500  
1 -8.85590400 -7.67573100 -0.01163500  
1 7.74891300 6.94944600 0.00938200  
1 6.51616500 9.03203900 0.01045200  
1 9.93667900 -1.81502800 0.00327900  
1 8.74165500 -3.91830300 0.00094300  
1 -0.18667700 -10.19001300 -0.00900000  
1 2.23264000 -10.17821500 -0.00770500  
1 -8.97587200 1.52496100 -0.00439700  
1 -10.14658000 -0.59580900 -0.00674600  
1 -6.80623100 5.30737600 -0.00003800  
1 -7.99973100 3.23967800 -0.00244500

20. [24]clarene  
<2,2,8,2,2,8>

E(wB97XD/cc-pVDZ) = -3686.44493678  
No imaginary frequency (B3LYP/6-31G\*)

6 2.47814900 9.28881700 0.00815000  
6 1.78857700 10.53511600 0.06449400  
6 0.39386700 10.53604200 0.09081300  
6 -0.34902600 9.34658200 0.05122400  
6 0.33462100 8.10276000 -0.03529100  
6 1.73327000 8.11592600 -0.04842200  
6 6.77396100 9.28457600 -0.01973400

|   |             |              |             |   |              |              |             |
|---|-------------|--------------|-------------|---|--------------|--------------|-------------|
| 6 | 6.05349100  | 10.48388800  | 0.00136100  | 6 | 2.55744600   | 11.76181800  | 0.09060600  |
| 6 | 4.65463600  | 10.50845300  | 0.02274800  | 6 | 8.90765100   | 8.09442200   | -0.08764500 |
| 6 | 3.94341500  | 9.27806800   | 0.00894900  | 6 | 8.22105400   | 9.25981100   | -0.05968500 |
| 6 | 4.67084900  | 8.08979300   | 0.00188300  | 6 | 2.48223300   | -8.16847500  | -0.06432100 |
| 6 | 6.06363500  | 8.05373500   | -0.00540500 | 6 | 1.78207800   | -9.33201500  | -0.09312300 |
| 6 | 8.92700100  | 5.60773100   | -0.08684500 | 6 | -3.91208600  | -11.74619000 | -0.05740800 |
| 6 | 8.22932200  | 6.81541100   | -0.06094000 | 6 | -2.55953000  | -11.75848700 | -0.08556900 |
| 6 | 6.80522800  | 6.78995100   | -0.00431000 | 6 | -8.90973300  | -8.09108800  | 0.09267200  |
| 6 | 6.16149700  | 5.55867800   | 0.05283300  | 6 | -8.22313600  | -9.25647700  | 0.06472400  |
| 6 | 6.84890800  | 4.34055700   | 0.03995600  | 6 | 8.97518700   | 3.12104900   | -0.09313300 |
| 6 | 8.26787400  | 4.36987100   | -0.04669400 | 6 | 8.31708500   | 1.93320400   | -0.06390300 |
| 6 | 0.34694300  | -9.34325000  | -0.04621300 | 6 | 6.85413500   | -0.66231900  | -0.03310700 |
| 6 | -0.33670400 | -8.09942700  | 0.04029200  | 6 | 6.18106400   | -1.84830300  | -0.02017500 |
| 6 | -1.73535400 | -8.11259300  | 0.05342500  | 6 | 4.69061000   | -4.42872500  | -0.02063700 |
| 6 | -2.48023200 | -9.28548400  | -0.00313800 | 6 | 3.99957400   | -5.60433400  | -0.03366800 |
| 6 | -1.79066000 | -10.53178400 | -0.05947200 | 6 | -8.31916800  | -1.92987000  | 0.06889900  |
| 6 | -0.39595000 | -10.53271000 | -0.08579200 | 6 | -8.97727000  | -3.11771500  | 0.09813300  |
| 6 | -3.94549800 | -9.27473500  | -0.00393400 | 6 | -6.18314600  | 1.85163600   | 0.02517000  |
| 6 | -4.67293100 | -8.08646000  | 0.00311700  | 6 | -6.85621700  | 0.66565200   | 0.03810200  |
| 6 | -6.06571700 | -8.05040100  | 0.01041700  | 6 | -4.00165700  | 5.60766600   | 0.03866800  |
| 6 | -6.77604300 | -9.28124200  | 0.02476600  | 6 | -4.69269300  | 4.43205800   | 0.02563300  |
| 6 | -6.05557400 | -10.48055500 | 0.00368100  | 1 | -0.13732500  | 11.48989000  | 0.14509000  |
| 6 | -4.65671900 | -10.50512000 | -0.01771300 | 1 | 2.25991500   | 7.16894100   | -0.10159400 |
| 6 | -6.16358000 | -5.55534400  | -0.04783200 | 1 | 6.60019800   | 11.43056700  | 0.00115000  |
| 6 | -6.85099100 | -4.33722300  | -0.03496300 | 1 | 4.12833200   | 7.14991800   | 0.00206000  |
| 6 | -8.26995700 | -4.36653700  | 0.05169300  | 1 | 10.01865200  | 5.62420300   | -0.14131200 |
| 6 | -8.92908300 | -5.60439600  | 0.09185400  | 1 | 5.07811000   | 5.54160600   | 0.10642200  |
| 6 | -8.23140400 | -6.81207600  | 0.06595300  | 1 | -2.26199800  | -7.16560900  | 0.10659700  |
| 6 | -6.80731000 | -6.78661700  | 0.00931700  | 1 | 0.13524100   | -11.48655900 | -0.14006100 |
| 6 | 6.88073900  | 1.85812200   | 0.03412000  | 1 | -4.13041500  | -7.14658500  | 0.00291400  |
| 6 | 6.15603400  | 3.06139000   | 0.10294600  | 1 | -6.60228100  | -11.42723300 | 0.00390500  |
| 6 | 4.74213100  | 2.99719500   | 0.23892300  | 1 | -5.08019200  | -5.53827100  | -0.10141500 |
| 6 | 4.08013000  | 1.80802800   | 0.28580400  | 1 | -10.02073400 | -5.62086900  | 0.14632800  |
| 6 | 4.77102100  | 0.56778300   | 0.19075000  | 1 | 4.15711800   | 3.91117500   | 0.31986100  |
| 6 | 6.17765600  | 0.59344800   | 0.06616200  | 1 | 2.99836400   | 1.82893700   | 0.39722800  |
| 6 | 4.75806500  | -1.90994900  | 0.09938200  | 1 | 2.06834100   | 0.18117000   | 0.45494600  |
| 6 | 4.05868500  | -0.69198700  | 0.21365000  | 1 | 0.87760700   | -1.88034200  | 0.45480200  |
| 6 | 2.63973700  | -0.73809900  | 0.34662200  | 1 | -0.08449400  | -3.50883900  | 0.39743500  |
| 6 | 1.95939800  | -1.91597600  | 0.34659500  | 1 | -1.30968700  | -5.55319000  | 0.32012400  |
| 6 | 2.62848900  | -3.16812900  | 0.21357400  | 1 | -3.00045200  | -1.82560300  | -0.39228700 |
| 6 | 4.03300000  | -3.16529200  | 0.09926100  | 1 | -4.15920600  | -3.90784200  | -0.31491200 |
| 6 | 2.57383300  | -5.64586500  | 0.06581700  | 1 | -0.87969300  | 1.88367700   | -0.44984500 |
| 6 | 1.89323600  | -4.41462600  | 0.19061700  | 1 | -2.07042700  | -0.17783600  | -0.44999200 |
| 6 | 0.47373700  | -4.43570000  | 0.28587200  | 1 | 1.30760200   | 5.55652600   | -0.31516100 |
| 6 | -0.22567200 | -5.60324300  | 0.23905200  | 1 | 0.08240900   | 3.51217500   | -0.39248100 |
| 6 | 0.42516400  | -6.86012000  | 0.10298400  | 1 | -2.31208100  | 10.28900400  | 0.16422500  |
| 6 | 1.82961000  | -6.88675000  | 0.03384200  | 1 | -3.57119000  | 8.22038000   | 0.11379200  |
| 6 | -4.08221600 | -1.80469500  | -0.28084600 | 1 | 4.47014500   | 12.68703500  | 0.07595400  |
| 6 | -4.77310500 | -0.56444900  | -0.18577900 | 1 | 2.01522400   | 12.70911800  | 0.12837400  |
| 6 | -6.17973900 | -0.59011500  | -0.06117700 | 1 | 9.99914000   | 8.09819400   | -0.12574200 |
| 6 | -6.88282200 | -1.85478800  | -0.02913200 | 1 | 8.75320700   | 10.21348900  | -0.07362700 |
| 6 | -6.15811800 | -3.05805600  | -0.09796300 | 1 | 3.56910700   | -8.21704900  | -0.10877900 |
| 6 | -4.74421700 | -2.99386200  | -0.23396000 | 1 | 2.30999700   | -10.28567200 | -0.15920300 |
| 6 | -1.96148300 | 1.91931000   | -0.34163100 | 1 | -4.47222900  | -12.68370300 | -0.07089500 |
| 6 | -2.63057300 | 3.17146300   | -0.20859900 | 1 | -2.01730800  | -12.70578700 | -0.12333100 |
| 6 | -4.03508300 | 3.16862500   | -0.09427600 | 1 | -10.00122200 | -8.09485900  | 0.13077300  |
| 6 | -4.76014800 | 1.91328200   | -0.09439900 | 1 | -8.75529000  | -10.21015500 | 0.07867900  |
| 6 | -4.06077000 | 0.69532000   | -0.20867800 | 1 | 10.06505000  | 3.14019600   | -0.15917500 |
| 6 | -2.64182200 | 0.74143300   | -0.34166000 | 1 | 8.90233200   | 1.01606400   | -0.10781200 |
| 6 | 0.22358800  | 5.60657700   | -0.23407800 | 1 | 7.93823200   | -0.68937600  | -0.13020800 |
| 6 | -0.42724800 | 6.86345300   | -0.09799300 | 1 | 6.75936400   | -2.76685300  | -0.10631500 |
| 6 | -1.83169300 | 6.89008300   | -0.02884500 | 1 | 5.77524100   | -4.47054600  | -0.10709600 |
| 6 | -2.57591600 | 5.64919800   | -0.06082500 | 1 | 4.56484400   | -6.52972200  | -0.13103100 |
| 6 | -1.89531900 | 4.41795900   | -0.18563900 | 1 | -8.90441400  | -1.01273000  | 0.11281100  |
| 6 | -0.47582200 | 4.43903500   | -0.28090400 | 1 | -10.06713300 | -3.13686200  | 0.16417900  |
| 6 | -1.78416100 | 9.33534700   | 0.09813700  | 1 | -6.76144500  | 2.77018600   | 0.11131800  |
| 6 | -2.48431600 | 8.17180700   | 0.06932900  | 1 | -7.94031300  | 0.69270900   | 0.13521300  |
| 6 | 3.91000300  | 11.74952300  | 0.06245300  | 1 | -4.56692600  | 6.53305300   | 0.13603900  |

1 -5.77732300 4.47387800 0.11209900

## 21. [26]clarene

<2,4,6,4,2,8>

E(wB97XD/cc-pVDZ) = -3993.64412437  
No imaginary frequency (B3LYP/6-31G\*)

6 1.25505400 9.99355200 0.00417600  
6 0.56607400 11.24191100 0.00300800  
6 -0.82797300 11.24715100 0.00206500  
6 -1.57438300 10.05869500 0.00221500  
6 -0.89256100 8.81172800 0.00331900  
6 0.50761700 8.82168400 0.00426300  
6 5.55271300 9.99824000 0.00718000  
6 4.82706100 11.19889900 0.00591600  
6 3.43273800 11.21737300 0.00492900  
6 2.72320700 9.98120200 0.00522400  
6 3.45119600 8.79656600 0.00652300  
6 4.85048600 8.76319400 0.00747400  
6 9.86462200 2.56899600 0.01500900  
6 9.17670400 3.78606100 0.01380100  
6 7.75216500 3.78167800 0.01316400  
6 7.09246300 2.55173300 0.01405800  
6 7.76753400 1.32927700 0.01525500  
6 9.19201000 1.34250500 0.01565400  
6 3.43017200 -8.63235000 0.01749200  
6 2.72994700 -7.39180700 0.01686200  
6 1.33369600 -7.41742700 0.01589300  
6 0.59770100 -8.60332600 0.01548000  
6 1.30566200 -9.83954300 0.01629800  
6 2.70364500 -9.82767600 0.01726700  
6 -5.16744400 -8.57858500 0.01077900  
6 -5.89577400 -7.38330700 0.00963600  
6 -7.28570000 -7.34491200 0.00848800  
6 -8.00203200 -8.57706900 0.00857800  
6 -7.28916300 -9.77553000 0.00974400  
6 -5.88653600 -9.80395400 0.01083200  
6 -7.38822100 -4.84647000 0.00686700  
6 -8.07894100 -3.62850500 0.00565600  
6 -9.49975200 -3.66077700 0.00475300  
6 -10.15646100 -4.90109800 0.00503000  
6 -9.45557900 -6.10616200 0.00620400  
6 -8.02997900 -6.07935000 0.00719500  
6 7.73155900 6.27150700 0.01122000  
6 7.00531900 7.51904300 0.00986000  
6 5.59509400 7.51055900 0.00877600  
6 4.92539600 6.26154700 0.00892400  
6 5.61255000 5.08281700 0.01030300  
6 7.02934400 5.04989600 0.01160700  
6 7.77803500 -1.15699900 0.01690100  
6 7.06118100 0.05310400 0.01598800  
6 5.64163900 0.00128300 0.01572200  
6 4.96772800 -1.18274100 0.01618500  
6 5.65304300 -2.42830200 0.01694600  
6 7.06464300 -2.41530800 0.01738600  
6 5.62249700 -4.91214300 0.01784500  
6 4.92839700 -3.68296200 0.01718500  
6 3.50704200 -3.71157700 0.01668900  
6 2.81809400 -4.88689500 0.01666400  
6 3.48253600 -6.14241100 0.01713500  
6 4.88900100 -6.15882700 0.01782300  
6 -0.86203700 -8.61090200 0.01423500  
6 -1.59845800 -7.40010000 0.01293600  
6 -2.96285600 -7.39373300 0.01179700

6 -3.71028300 -8.59782400 0.01190400  
6 -3.01305900 -9.82369900 0.01307900  
6 -1.56950800 -9.82957600 0.01419500  
6 -5.30722900 -1.09016300 0.00577500  
6 -6.00628400 0.14903200 0.00473400  
6 -7.41804800 0.12209100 0.00391800  
6 -8.11874600 -1.14490800 0.00418900  
6 -7.38801500 -2.34713000 0.00530800  
6 -5.96804100 -2.28033600 0.00606100  
6 -3.19030200 2.62858800 0.00516300  
6 -3.86585400 3.88379000 0.00404400  
6 -5.27505300 3.88507500 0.00318400  
6 -6.00040400 2.62918300 0.00342100  
6 -5.29515600 1.40921000 0.00450300  
6 -3.87032400 1.45126700 0.00538100  
6 -1.00592900 6.30963800 0.00448000  
6 -1.65747200 7.57312500 0.00345100  
6 -3.06405800 7.60568900 0.00254800  
6 -3.81160400 6.36576600 0.00274600  
6 -3.12962500 5.12941200 0.00380800  
6 -1.70692200 5.14270800 0.00463900  
6 -3.01008600 10.05359400 0.00127500  
6 -3.71429500 8.89184000 0.00144100  
6 2.68573500 12.45886200 0.00368000  
6 1.33412300 12.47046900 0.00280300  
6 9.85790200 5.05282000 0.01323000  
6 9.17530500 6.22494800 0.01211100  
6 5.55593600 -7.43856000 0.01843300  
6 4.86743600 -8.60796900 0.01831700  
6 -5.14372400 -11.03359800 0.01205400  
6 -3.78606400 -11.04209500 0.01312200  
6 -10.13608700 -7.38531600 0.00641400  
6 -9.45068400 -8.55030200 0.00750200  
6 7.67467000 8.79733000 0.00955600  
6 6.98902900 9.96917300 0.00826600  
6 9.88890300 0.08523800 0.01671200  
6 9.21978700 -1.09537100 0.01726300  
6 7.73487700 -3.68029200 0.01825100  
6 7.05311800 -4.86061300 0.01846400  
6 -0.80771800 -11.05689900 0.01520800  
6 0.54867800 -11.06245400 0.01612700  
6 -9.55774200 -1.22406200 0.00332500  
6 -10.21246200 -2.41443300 0.00357300  
6 -7.42859400 2.56657500 0.00259800  
6 -8.10026000 1.37905600 0.00284100  
6 -5.24128400 6.32866900 0.00190200  
6 -5.93439100 5.15352900 0.00210200  
1 -1.35687800 12.20381900 0.00118400  
1 1.03274500 7.87225800 0.00508900  
1 5.37213500 12.14644400 0.00572700  
1 2.91046000 7.85591000 0.00688800  
1 10.95768900 2.57588800 0.01545500  
1 6.00800300 2.54466200 0.01387800  
1 0.79861000 -6.47406300 0.01547500  
1 3.24363400 -10.77806100 0.01785300  
1 -5.35210500 -6.44433800 0.00969400  
1 -7.83746000 -10.72121200 0.00983000  
1 -6.30348700 -4.82714800 0.00757100  
1 -11.24942600 -4.92083100 0.00429400  
1 3.83821400 6.21988400 0.00785300  
1 5.04044200 4.15737000 0.01023200  
1 5.05911600 0.92024400 0.01512500  
1 3.88067200 -1.15159600 0.01592600  
1 2.93715600 -2.78530500 0.01630500  
1 1.73100900 -4.84154900 0.01626800  
1 -1.08253800 -6.44221500 0.01271400  
1 -3.47010200 -6.43120200 0.01074600  
1 -4.21998900 -1.10959500 0.00635200

1 -5.37634300 -3.19336100 0.00685800  
1 -2.10354500 2.58962400 0.00589300  
1 -3.29352300 0.52936400 0.00627500  
1 0.08059400 6.25319100 0.00515700  
1 -1.14744100 4.21020600 0.00542000  
1 -3.53566000 11.01084800 0.00042000  
1 -4.80191000 8.94529900 0.00069800  
1 3.24578200 13.39650200 0.00348700  
1 0.79019100 13.41754600 0.00190000  
1 10.94994300 5.05655200 0.01376500  
1 9.74320000 7.15382400 0.01179500  
1 6.64410400 -7.47790700 0.01900500  
1 5.40469500 -9.55869200 0.01880500  
1 -5.69539700 -11.97607100 0.01213300  
1 -3.27570100 -12.00376800 0.01406500  
1 -11.22825100 -7.38739600 0.00564200  
1 -9.98311500 -9.50390100 0.00761300  
1 8.76274400 8.83529900 0.01040400  
1 7.52986300 10.91790900 0.00807500  
1 10.98089000 0.09478500 0.01701800  
1 9.79766400 -2.01822100 0.01799000  
1 8.82304500 -3.71801500 0.01876900  
1 7.62970200 -5.78420400 0.01913600  
1 -1.32821800 -12.01311300 0.01517200  
1 1.09109900 -12.01026100 0.01678900  
1 -10.14733500 -0.30856900 0.00242200  
1 -11.30426600 -2.43730100 0.00287500  
1 -8.01243400 3.48585600 0.00176200  
1 -9.18879800 1.40626100 0.00219400  
1 -5.80891600 7.25786100 0.00107800  
1 -7.02242100 5.19995800 0.00141600

6 -7.84978100 -11.14908500 -0.03362300  
6 -7.12954500 -12.34803500 0.00239000  
6 -5.73111500 -12.37210100 0.03875400  
6 -7.23937500 -7.42259200 0.03793200  
6 -7.92746100 -6.20503700 0.01234300  
6 -9.34489200 -6.23626700 -0.09826400  
6 -10.00255800 -7.47441900 -0.14490000  
6 -9.30467600 -8.68133400 -0.10448000  
6 -7.88158700 -8.65448800 -0.02772100  
6 7.96395400 3.72433600 0.00611400  
6 7.23803500 4.92558100 -0.08027700  
6 5.82724200 4.85667900 -0.24557200  
6 5.16957100 3.66521900 -0.30587600  
6 5.86158900 2.42689000 -0.19373800  
6 7.26501600 2.45811800 -0.03619100  
6 5.85813300 -0.04961400 -0.09443800  
6 5.15546100 1.16357500 -0.23257400  
6 3.74072100 1.10699500 -0.40716700  
6 3.06829800 -0.07581000 -0.42749400  
6 3.74098900 -1.32396200 -0.27111900  
6 5.14157500 -1.30942400 -0.10942700  
6 3.70534600 -3.79706500 -0.10889900  
6 3.01760800 -2.57696800 -0.27094200  
6 1.60034600 -2.61849200 -0.42734100  
6 0.91220200 -3.79220600 -0.40662100  
6 1.57060500 -5.04562500 -0.23161600  
6 2.97263200 -5.04753500 -0.09340300  
6 1.50416200 -7.51970500 -0.03442300  
6 0.82959200 -6.28873600 -0.19246600  
6 -0.58880000 -6.30836800 -0.30483800  
6 -1.29197500 -7.47353200 -0.24442400  
6 -0.64633600 -8.72980500 -0.07882300  
6 0.75694400 -8.75800800 0.00802700  
6 -5.16921400 -3.66414700 0.31158900  
6 -5.86123200 -2.42581900 0.19945300  
6 -7.26465900 -2.45704600 0.04190800  
6 -7.96359700 -3.72326500 -0.00039800  
6 -7.23767800 -4.92450900 0.08599200  
6 -5.82688500 -4.85560700 0.25128500  
6 -3.06794100 0.07688100 0.43320900  
6 -3.74063200 1.32503300 0.27683500  
6 -5.14121800 1.31049500 0.11514400  
6 -5.85777600 0.05068500 0.10015600  
6 -5.15510400 -1.16250400 0.23829000  
6 -3.74036400 -1.10592400 0.41288200  
6 -0.91184500 3.79327700 0.41233300  
6 -1.57024800 5.04669600 0.23732800  
6 -2.97227500 5.04860600 0.09911700  
6 -3.70498900 3.79813700 0.11461500  
6 -3.01725100 2.57803900 0.27665600  
6 -1.59998900 2.61956300 0.43305300  
6 1.29233300 7.47460300 0.25013300  
6 0.64669300 8.73087600 0.08453300  
6 -0.75658700 8.75907900 -0.00231500  
6 -1.50380400 7.52077600 0.04013600  
6 -0.82923400 6.28980700 0.19817700  
6 0.58915800 6.30943900 0.31054600  
6 -0.70506600 11.20186600 -0.16317700  
6 -1.40669200 10.03973100 -0.12706800  
6 4.98774000 13.61393900 -0.09108500  
6 3.63569200 13.62575300 -0.13479700  
6 9.98284300 9.96151700 0.14079800  
6 9.29652700 11.12649300 0.09751200  
6 1.40704900 -10.03866000 0.13278300  
6 0.70542300 -11.20079500 0.16889300  
6 -4.98738300 -13.61286800 0.09680000  
6 -3.63533500 -13.62468200 0.14051300  
6 -9.98248600 -9.96044500 -0.13508300

## 22. [28]clarene

<2,2,10,2,2,10>

E(wB97XD/cc-pVDZ) = -4300.85540723  
No imaginary frequency (B3LYP/6-31G\*)

6 3.55514800 11.15329600 -0.02809400  
6 2.86688100 12.39919500 -0.10481600  
6 1.47274100 12.40021100 -0.14587700  
6 0.72924200 11.21163500 -0.09974700  
6 1.41085600 9.96843400 0.01106300  
6 2.80933400 9.98118800 0.03715000  
6 7.85013800 11.15015600 0.03933700  
6 7.12990200 12.34910700 0.00332400  
6 5.73147200 12.37317200 -0.03304000  
6 5.02023900 11.14276000 -0.01703800  
6 5.74759300 9.95464400 0.00268400  
6 7.14021300 9.91905500 0.02272900  
6 10.00291500 7.47549000 0.15061400  
6 9.30503400 8.68240500 0.11019400  
6 7.88194400 8.65555900 0.03343400  
6 7.23973200 7.42366300 -0.03221800  
6 7.92781800 6.20610800 -0.00662800  
6 9.34524900 6.23733800 0.10397900  
6 -0.72888500 -11.21056300 0.10546000  
6 -1.41049900 -9.96736300 -0.00535200  
6 -2.80897700 -9.98011600 -0.03144100  
6 -3.55479100 -11.15222500 0.03380500  
6 -2.86652400 -12.39812400 0.11053000  
6 -1.47238400 -12.39914000 0.15159200  
6 -5.01988200 -11.14168800 0.02275000  
6 -5.74723600 -9.95357200 0.00302800  
6 -7.13985600 -9.91798400 -0.01701600

6 -9.29617000 -11.12542100 -0.09179700  
6 10.05386200 4.99020200 0.16672000  
6 9.39812700 3.80155800 0.13037100  
6 7.94458200 1.20641100 0.08543600  
6 7.27697100 0.01806000 0.06217800  
6 5.80617900 -2.56418200 0.04266900  
6 5.12430700 -3.74517600 0.04295900  
6 3.62335700 -6.31012000 0.06380400  
6 2.92791000 -7.48239500 0.08743800  
6 -9.39777000 -3.80048600 -0.12465500  
6 -10.05350500 -4.98913100 -0.16100500  
6 -7.27661400 -0.01698800 -0.05645800  
6 -7.94422500 -1.20534000 -0.07971700  
6 -5.12395100 3.74624700 -0.03724200  
6 -5.80582200 2.56525400 -0.03695100  
6 -2.92755300 7.48346600 -0.08172300  
6 -3.62300000 6.31119100 -0.05809000  
1 0.94240300 13.35341700 -0.21703300  
1 3.33487300 9.03464700 0.10840500  
1 7.67644300 13.29587700 0.00354200  
1 5.20525000 9.01462800 0.00237900  
1 11.09359200 7.49271700 0.22171200  
1 6.15725700 7.40554700 -0.10346700  
1 -3.33451600 -9.03357600 -0.10269900  
1 -0.94204600 -13.35234500 0.22275000  
1 -5.20489300 -9.01355700 0.00333200  
1 -7.67608600 -13.29480600 0.00217300  
1 -6.15690000 -7.40447500 0.10918200  
1 -11.09323500 -7.49164500 -0.21599800  
1 5.24160200 5.76903100 -0.34042800  
1 4.09026500 3.68244100 -0.44087800  
1 3.16683300 2.02251900 -0.53414100  
1 1.98981600 -0.04824300 -0.56845800  
1 1.03724000 -1.69833000 -0.56874400  
1 -0.16763100 -3.75315500 -0.53346400  
1 -1.14296300 -5.38203000 -0.44010000  
1 -2.37493000 -7.42256100 -0.33936200  
1 -4.08990800 -3.68137000 0.44659100  
1 -5.24124500 -5.76796000 0.34614100  
1 -1.98945900 0.04931400 0.57417200  
1 -3.16647600 -2.02144700 0.53985500  
1 0.16798800 3.75422600 0.53917500  
1 -1.03688300 1.69940200 0.57445600  
1 2.37528700 7.42363200 0.34506800  
1 1.14332100 5.38310100 0.44580600  
1 -1.23073900 12.15525400 -0.24816100  
1 -2.49283700 10.08889900 -0.18465300  
1 5.54818400 14.55123300 -0.10663600  
1 3.09367700 14.57245000 -0.18749900  
1 11.07370900 9.96550900 0.19367000  
1 9.82802600 12.08049700 0.11355500  
1 2.49319400 -10.08782700 0.19036900  
1 1.23109600 -12.15418200 0.25387800  
1 -5.54782700 -14.55016100 0.11235200  
1 -3.09332000 -14.57137900 0.19321700  
1 -11.07335200 -9.96443800 -0.18795600  
1 -9.82766900 -12.07942500 -0.10784000  
1 11.14239300 5.01152300 0.25131300  
1 9.98390400 2.88557500 0.18725100  
1 9.02591400 1.18443300 0.20965100  
1 7.85670900 -0.89746700 0.16702900  
1 6.88730700 -2.59580500 0.16700000  
1 5.69244100 -4.66546700 0.16751400  
1 4.70611100 -6.35431500 0.16887000  
1 3.48763800 -8.40776200 0.21210500  
1 -9.98354700 -2.88450300 -0.18153500  
1 -11.14203600 -5.01045200 -0.24559800  
1 -7.85635200 0.89853900 -0.16130800

1 -9.02555800 -1.18336100 -0.20393000  
1 -5.69208400 4.66653900 -0.16179600  
1 -6.88695100 2.59687600 -0.16128100  
1 -3.48728100 8.40883300 -0.20639000  
1 -4.70575400 6.35538700 -0.16315400

### 23. [30]clarene

<2,8,2,8,2,8>

E(wB97XD/cc-pVDZ) = -4608.05611006  
No imaginary frequency (B3LYP/6-31G\*)

6 12.14664400 3.74975200 -0.00328600  
6 11.45343900 4.95863400 -0.00303300  
6 10.02747700 4.94128300 -0.00241100  
6 9.37787500 3.71201300 -0.00212000  
6 10.06148700 2.48938500 -0.00248100  
6 11.48257000 2.51383400 -0.00303000  
6 10.02122800 7.43951500 -0.00265200  
6 9.32104800 8.64440800 -0.00260400  
6 7.91866600 8.68734600 -0.00208000  
6 7.18682500 7.46894400 -0.00148200  
6 7.90372100 6.26548800 -0.00157300  
6 9.29310300 6.21336100 -0.00217600  
6 3.56421800 -11.20129200 -0.00347000  
6 2.87488200 -9.95833500 -0.00300000  
6 1.47422200 -9.97736700 -0.00291400  
6 0.73440400 -11.15455500 -0.00330100  
6 1.43232600 -12.39819500 -0.00375400  
6 2.82584700 -12.39428700 -0.00381800  
6 10.09171000 0.00566400 -0.00256700  
6 9.36507900 1.21053200 -0.00234700  
6 7.94477200 1.14710800 -0.00209800  
6 7.28045200 -0.04165700 -0.00195200  
6 7.97581100 -1.28312800 -0.00203100  
6 9.38764000 -1.25903300 -0.00238800  
6 7.96750700 -3.76311400 -0.00221000  
6 7.26286100 -2.54277500 -0.00184800  
6 5.83788700 -2.58561300 -0.00129400  
6 5.15791500 -3.76353200 -0.00130800  
6 5.83348900 -5.01890800 -0.00188600  
6 7.24269700 -5.01880800 -0.00224500  
6 5.78433600 -7.50083200 -0.00256900  
6 5.09924400 -6.26619900 -0.00211000  
6 3.67643200 -6.28453300 -0.00194600  
6 2.97899200 -7.45414700 -0.00221700  
6 3.63426000 -8.71589300 -0.00267000  
6 5.04109800 -8.74288800 -0.00283800  
6 -9.37787500 3.71201300 -0.00233100  
6 -10.02747700 4.94128300 -0.00264500  
6 -11.45343900 4.95863400 -0.00307000  
6 -12.14664400 3.74975200 -0.00357500  
6 -11.48257000 2.51383400 -0.00329800  
6 -10.06148700 2.48938500 -0.00271200  
6 -7.18682500 7.46894400 -0.00165000  
6 -7.91866600 8.68734600 -0.00226300  
6 -9.32104800 8.64440800 -0.00282200  
6 -10.02122800 7.43951500 -0.00288700  
6 -9.29310300 6.21336100 -0.00239300  
6 -7.90372100 6.26548800 -0.00175900  
6 -0.73440400 -11.15455500 -0.00331000  
6 -1.47422200 -9.97736700 -0.00292500  
6 -2.87488200 -9.95833500 -0.00303300  
6 -3.56421800 -11.20129200 -0.00352400  
6 -2.82584800 -12.39428700 -0.00386500



6 -1.43232600 -12.39819500 -0.00377800  
6 -7.28045200 -0.04165700 -0.00210700  
6 -7.94477200 1.14710800 -0.00228700  
6 -9.36507900 1.21053200 -0.00255700  
6 -10.09171000 0.00566400 -0.00278300  
6 -9.38764100 -1.25903300 -0.00257300  
6 -7.97581100 -1.28312800 -0.00217500  
6 -5.15791500 -3.76353200 -0.00129700  
6 -5.83788700 -2.58561300 -0.00130900  
6 -7.26286100 -2.54277500 -0.00194700  
6 -7.96750700 -3.76311400 -0.00234000  
6 -7.24269700 -5.01880800 -0.00235400  
6 -5.83348900 -5.01890800 -0.00193400  
6 -2.97899200 -7.45414700 -0.00222300  
6 -3.67643200 -6.28453300 -0.00195200  
6 -5.09924400 -6.26619900 -0.00215300  
6 -5.78433600 -7.50083200 -0.00265000  
6 -5.04109800 -8.74288800 -0.00290800  
6 -3.63426000 -8.71589300 -0.00270600  
6 5.73110400 7.50536800 -0.00089600  
6 5.05102800 8.73724600 -0.00119300  
6 3.60370500 8.75994900 -0.00085400  
6 2.87689100 7.54934000 -0.00003800  
6 3.60425200 6.32641200 0.00041700  
6 4.96589500 6.30714300 -0.00002600  
6 1.42955300 7.56152400 0.00023100  
6 0.72491700 8.78189900 -0.00050900  
6 -0.72491700 8.78189900 -0.00052600  
6 -1.42955300 7.56152400 0.00019700  
6 -0.68005800 6.34882300 0.00119700  
6 0.68005800 6.34882300 0.00121300  
6 -2.87689100 7.54934000 -0.00010500  
6 -3.60370500 8.75994900 -0.00093700  
6 -5.05102800 8.73724600 -0.00131000  
6 -5.73110400 7.50536800 -0.00103000  
6 -4.96589500 6.30714300 -0.00014300  
6 -3.60425200 6.32641200 0.00033200  
6 12.19046600 1.26513200 -0.00330300  
6 11.53086500 0.07790700 -0.00305100  
6 12.14506800 6.23167400 -0.00339900  
6 11.46950700 7.40184000 -0.00323100  
6 -0.67559400 -13.63360800 -0.00417400  
6 0.67559400 -13.63360800 -0.00416200  
6 10.06858500 -2.51652200 -0.00260000  
6 9.39562700 -3.70280400 -0.00255100  
6 7.90463400 -6.28573100 -0.00267200  
6 7.21381100 -7.46170800 -0.00280100  
6 5.69805100 -10.02538500 -0.00330900  
6 4.99955900 -11.19013800 -0.00359900  
6 -11.46950700 7.40184000 -0.00350300  
6 -12.14506800 6.23167400 -0.00369100  
6 -5.83334000 9.94736500 -0.00196400  
6 -7.19130600 9.92479800 -0.00235700  
6 -5.69805100 -10.02538500 -0.00339900  
6 -4.99955900 -11.19013800 -0.00368100  
6 -12.19046600 1.26513200 -0.00358300  
6 -11.53086500 0.07790700 -0.00330400  
6 -10.06858500 -2.51652200 -0.00279900  
6 -9.39562700 -3.70280300 -0.00273000  
6 -7.90463400 -6.28573100 -0.00282500  
6 -7.21381100 -7.46170800 -0.00293800  
6 7.19130600 9.92479800 -0.00219200  
6 5.83334000 9.94736500 -0.00183000  
6 2.85499800 9.97831800 -0.00140900  
6 1.49115400 9.98854300 -0.00128500  
6 -1.49115400 9.98854300 -0.00131800  
6 -2.85499800 9.97831800 -0.00147400  
1 13.23970300 3.76274300 -0.00372000

1 8.29278700 3.69927100 -0.00156700  
1 9.87892000 9.58446000 -0.00302600  
1 7.35005000 5.33216700 -0.00123900  
1 0.94283700 -9.03112400 -0.00254800  
1 3.36105200 -13.34743300 -0.00416600  
1 7.35574400 2.06201100 -0.00211400  
1 6.19313500 -0.01944100 -0.00186200  
1 5.26093600 -1.66365000 -0.00079000  
1 4.07099600 -3.72508200 -0.00082700  
1 3.11402500 -5.35364300 -0.00164900  
1 1.89214900 -7.40153300 -0.00210100  
1 -8.29278700 3.69927100 -0.00173900  
1 -13.23970300 3.76274300 -0.00403700  
1 -9.87892000 9.58446000 -0.00325600  
1 -7.35005000 5.33216700 -0.00141700  
1 -0.94283800 -9.03112400 -0.00254400  
1 -3.36105200 -13.34743300 -0.00422600  
1 -6.19313500 -0.01944100 -0.00201000  
1 -7.35574400 2.06201100 -0.00231800  
1 -4.07099700 -3.72508300 -0.00074100  
1 -5.26093600 -1.66365000 -0.00074900  
1 -1.89214900 -7.40153300 -0.00208100  
1 -3.11402500 -5.35364300 -0.00163200  
1 3.07951300 5.37383700 0.00106900  
1 5.46330400 5.33939700 0.00035100  
1 -1.19034600 5.38833400 0.00201700  
1 1.19034600 5.38833400 0.00204500  
1 -5.46330400 5.33939700 0.00022200  
1 -3.07951300 5.37383700 0.00099600  
1 13.28233700 1.28392500 -0.00372600  
1 12.11649100 -0.84000100 -0.00327700  
1 13.23719500 6.22403800 -0.00384500  
1 12.00905200 8.35141000 -0.00354200  
1 -1.22824300 -14.57560800 -0.00449500  
1 1.22824300 -14.57560800 -0.00447200  
1 11.15698400 -2.54523800 -0.00281700  
1 9.97831700 -4.62270200 -0.00276000  
1 8.99266100 -6.33022000 -0.00290600  
1 7.78303500 -8.38981700 -0.00311600  
1 6.78582100 -10.07351000 -0.00344600  
1 5.52915400 -12.14515900 -0.00395800  
1 -12.00905200 8.35141000 -0.00382700  
1 -13.23719500 6.22403900 -0.00416800  
1 -5.33132300 10.91355600 -0.00209900  
1 -7.75361400 10.86092700 -0.00279800  
1 -6.78582100 -10.07351000 -0.00355600  
1 -5.52915400 -12.14515900 -0.00405300  
1 -13.28233700 1.28392500 -0.00403500  
1 -12.11649100 -0.84000100 -0.00353800  
1 -11.15698400 -2.54523800 -0.00304700  
1 -9.97831700 -4.62270200 -0.00295600  
1 -8.99266100 -6.33022000 -0.00311100  
1 -7.78303500 -8.38981700 -0.00329000  
1 7.75361400 10.86092700 -0.00262100  
1 5.33132300 10.91355600 -0.00197800  
1 3.37385800 10.93546800 -0.00202200  
1 0.98568600 10.95304900 -0.00180500  
1 -0.98568600 10.95304900 -0.00182700  
1 -3.37385800 10.93546800 -0.00209800

24. [32]clarene

<2,2,12,2,2,12>

E(wB97XD/cc-pVDZ) = -4915.26574906  
No imaginary frequency (B3LYP/6-31G\*)

|   |              |              |             |   |              |              |             |
|---|--------------|--------------|-------------|---|--------------|--------------|-------------|
| 6 | 4.63128200   | 13.02243200  | -0.03227600 | 6 | -6.93421100  | -4.29966700  | 0.20127100  |
| 6 | 3.94202700   | 14.26716300  | -0.11570000 | 6 | -8.33614700  | -4.33115900  | 0.02969100  |
| 6 | 2.54803900   | 14.26595500  | -0.16181400 | 6 | -9.03555000  | -5.59669700  | -0.01654800 |
| 6 | 1.80626300   | 13.07637600  | -0.11360600 | 6 | -8.31123100  | -6.79817100  | 0.07714800  |
| 6 | 2.48901300   | 11.83452000  | 0.00607100  | 6 | -6.90180600  | -6.72963600  | 0.25502700  |
| 6 | 3.88715200   | 11.84945600  | 0.03654600  | 6 | -4.14679900  | -1.79087800  | 0.47118500  |
| 6 | 8.92548500   | 13.02158200  | 0.04560200  | 6 | -4.81992100  | -0.54383200  | 0.30671700  |
| 6 | 8.20516900   | 14.22048900  | 0.00583300  | 6 | -6.21783000  | -0.56307900  | 0.12228800  |
| 6 | 6.80674600   | 14.24414400  | -0.03482600 | 6 | -6.93149300  | -1.82387600  | 0.09900700  |
| 6 | 6.09603200   | 13.01352300  | -0.01832100 | 6 | -6.22891400  | -3.03576200  | 0.24708800  |
| 6 | 6.82333200   | 11.82576900  | 0.00406100  | 6 | -4.81638900  | -2.97562000  | 0.43978600  |
| 6 | 8.21561600   | 11.79054800  | 0.02734600  | 6 | -2.00780300  | 1.94357100   | 0.51017000  |
| 6 | 11.07517000  | 9.34512200   | 0.16931400  | 6 | -2.67037200  | 3.19362000   | 0.32254400  |
| 6 | 10.37879800  | 10.55275200  | 0.12439400  | 6 | -4.06887700  | 3.18368100   | 0.14592100  |
| 6 | 8.95626800   | 10.52681000  | 0.04040100  | 6 | -4.79310500  | 1.92853700   | 0.14552600  |
| 6 | 8.31300300   | 9.29570200   | -0.02984300 | 6 | -4.10194300  | 0.71272000   | 0.32172400  |
| 6 | 8.99953500   | 8.07761700   | -0.00046200 | 6 | -2.68817500  | 0.76452500   | 0.50980300  |
| 6 | 10.41631900  | 8.10772100   | 0.11953600  | 6 | 0.16538300   | 5.65771200   | 0.44290400  |
| 6 | -1.80876300  | -13.07668900 | 0.11173400  | 6 | -0.48930000  | 6.91082100   | 0.25033300  |
| 6 | -2.49151300  | -11.83483300 | -0.00794300 | 6 | -1.89008800  | 6.91279300   | 0.10157500  |
| 6 | -3.88965100  | -11.84976900 | -0.03841800 | 6 | -2.62455300  | 5.66399600   | 0.12414100  |
| 6 | -4.63378200  | -13.02274400 | 0.03040300  | 6 | -1.94178200  | 4.44404400   | 0.30840300  |
| 6 | -3.94452600  | -14.26747500 | 0.11382800  | 6 | -0.52535800  | 4.48516600   | 0.47359000  |
| 6 | -2.55053900  | -14.26626800 | 0.15994200  | 6 | 2.37230700   | 9.34133100   | 0.26085400  |
| 6 | -6.09853200  | -13.01383600 | 0.01644800  | 6 | 1.72655000   | 10.59607100  | 0.08331500  |
| 6 | -6.82583200  | -11.82608100 | -0.00593500 | 6 | 0.32390200   | 10.62220900  | -0.01136300 |
| 6 | -8.21811600  | -11.79086000 | -0.02922000 | 6 | -0.42195800  | 9.38348200   | 0.03386700  |
| 6 | -8.92798500  | -13.02189400 | -0.04747400 | 6 | 0.25210500   | 8.15385800   | 0.20534800  |
| 6 | -8.20766800  | -14.22080100 | -0.00770500 | 6 | 1.66979700   | 8.17571400   | 0.32587700  |
| 6 | -6.80924600  | -14.24445600 | 0.03295500  | 6 | 0.37234200   | 13.06431400  | -0.18365000 |
| 6 | -8.31550300  | -9.29601400  | 0.02796800  | 6 | -0.32752200  | 11.90127600  | -0.14585800 |
| 6 | -9.00203600  | -8.07792900  | -0.00141300 | 6 | 6.06193100   | 15.48403400  | -0.09820000 |
| 6 | -10.41882000 | -8.10803300  | -0.12141000 | 6 | 4.70994700   | 15.49431900  | -0.14685200 |
| 6 | -11.07767000 | -9.34543400  | -0.17118800 | 6 | 11.05704800  | 11.83163800  | 0.15729300  |
| 6 | -10.38129800 | -10.55306500 | -0.12626800 | 6 | 10.37163900  | 12.99708200  | 0.10963700  |
| 6 | -8.95876800  | -10.52712200 | -0.04227500 | 6 | 0.32502200   | -11.90158900 | 0.14398600  |
| 6 | 9.03304900   | 5.59638500   | 0.01467200  | 6 | -0.37484200  | -13.06462700 | 0.18177800  |
| 6 | 8.30873000   | 6.79785800   | -0.07902400 | 6 | -6.06443100  | -15.48434600 | 0.09632900  |
| 6 | 6.89930600   | 6.72932300   | -0.25690400 | 6 | -4.71244600  | -15.49463100 | 0.14498000  |
| 6 | 6.24146400   | 5.53796600   | -0.32290300 | 6 | -11.05954800 | -11.83195100 | -0.15916500 |
| 6 | 6.93171000   | 4.29935400   | -0.20314800 | 6 | -10.37413900 | -12.99739500 | -0.11150900 |
| 6 | 8.33364600   | 4.33084700   | -0.03156800 | 6 | 11.12328400  | 6.86004400   | 0.18833800  |
| 6 | 6.92899300   | 1.82356400   | -0.10088500 | 6 | 10.46642700  | 5.67221200   | 0.14929200  |
| 6 | 6.22641300   | 3.03544900   | -0.24896700 | 6 | 9.01264700   | 3.08008200   | 0.10002200  |
| 6 | 4.81388900   | 2.97530700   | -0.44166700 | 6 | 8.34581400   | 1.89180700   | 0.07221200  |
| 6 | 4.14429900   | 1.79056500   | -0.47306500 | 6 | 6.88272900   | -0.68830300  | 0.04163400  |
| 6 | 4.81742100   | 0.54352000   | -0.30859600 | 6 | 6.20582100   | -1.87146600  | 0.03211500  |
| 6 | 6.21533000   | 0.56276700   | -0.12416500 | 6 | 4.72483300   | -4.43808300  | 0.03136700  |
| 6 | 4.79060500   | -1.92884900  | -0.14740400 | 6 | 4.03911700   | -5.61617000  | 0.04027500  |
| 6 | 4.09944300   | -0.71303300  | -0.32360300 | 6 | 2.53730600   | -8.17405200  | 0.06959600  |
| 6 | 2.68567600   | -0.76483800  | -0.51168200 | 6 | 1.84204100   | -9.34594000  | 0.09667400  |
| 6 | 2.00530300   | -1.94388400  | -0.51204800 | 6 | -10.46892800 | -5.67252500  | -0.15116700 |
| 6 | 2.66787200   | -3.19393300  | -0.32442100 | 6 | -11.12578500 | -6.86035700  | -0.19021200 |
| 6 | 4.06637700   | -3.18399400  | -0.14779900 | 6 | -8.34831400  | -1.89212000  | -0.07408800 |
| 6 | 2.62205300   | -5.66430900  | -0.12601700 | 6 | -9.01514700  | -3.08039400  | -0.10189800 |
| 6 | 1.93928200   | -4.44435700  | -0.31027900 | 6 | -6.20832200  | 1.87115400   | -0.03399200 |
| 6 | 0.52285800   | -4.48547900  | -0.47546400 | 6 | -6.88522900  | 0.68799000   | -0.04351100 |
| 6 | -0.16788300  | -5.65802500  | -0.44477700 | 6 | -4.04161700  | 5.61585700   | -0.04215300 |
| 6 | 0.48680100   | -6.91113400  | -0.25220700 | 6 | -4.72733200  | 4.43777000   | -0.03324500 |
| 6 | 1.88758900   | -6.91310500  | -0.10345100 | 6 | -1.84454000  | 9.34562700   | -0.09854900 |
| 6 | 0.41945900   | -9.38379500  | -0.03574000 | 6 | -2.53980600  | 8.17373900   | -0.07147300 |
| 6 | -0.25460400  | -8.15417100  | -0.20722100 | 1 | 2.01641500   | 15.21798200  | -0.23885500 |
| 6 | -1.67229600  | -8.17602700  | -0.32775000 | 1 | 4.41361900   | 10.90394200  | 0.11416100  |
| 6 | -2.37480700  | -9.34164400  | -0.26272700 | 1 | 8.75153300   | 15.16736200  | 0.00648100  |
| 6 | -1.72904900  | -10.59638400 | -0.08518700 | 1 | 6.28117500   | 10.88575100  | 0.00326500  |
| 6 | -0.32640100  | -10.62252200 | 0.00949000  | 1 | 12.16543600  | 9.36104500   | 0.24669500  |
| 6 | -6.24396500  | -5.53827800  | 0.32102500  | 1 | 7.23098100   | 9.27852000   | -0.10775000 |
|   |              |              |             | 1 | -4.41611800  | -10.90425500 | -0.11603300 |

1 -2.01891500 -15.21829500 0.23698300  
1 -6.28367500 -10.88606300 -0.00514100  
1 -8.75403200 -15.16767400 -0.00835200  
1 -7.23348200 -9.27883100 0.10587400  
1 -12.16793600 -9.36135800 -0.24856800  
1 6.31508900 7.64196900 -0.35810900  
1 5.16342100 5.55526100 -0.46840300  
1 4.23966300 3.88980700 -0.57529200  
1 3.06759300 1.81531600 -0.62866000  
1 2.11963600 0.15209000 -0.66335700  
1 0.92820100 -1.91273700 -0.66384200  
1 -0.03732200 -3.56563600 -0.63110000  
1 -1.24696600 -5.61861200 -0.57874100  
1 -2.22632000 -7.25100500 -0.47302400  
1 -3.45728700 -9.29243600 -0.36434400  
1 -5.16592100 -5.55557300 0.46652400  
1 -6.31758900 -7.64228100 0.35623100  
1 -3.07009300 -1.81562900 0.62677800  
1 -4.24216300 -3.89012000 0.57341000  
1 -0.93070100 1.91242400 0.66196400  
1 -2.12213600 -0.15240300 0.66147700  
1 1.24446600 5.61829900 0.57686900  
1 0.03482200 3.56532300 0.62922700  
1 3.45478700 9.29212300 0.36247100  
1 2.22382100 7.25069200 0.47115100  
1 -0.15435700 14.01650300 -0.27537300  
1 -1.41341200 11.94859600 -0.20878100  
1 6.62137700 16.42191600 -0.11427000  
1 4.16727200 16.44036900 -0.20419600  
1 12.14766200 11.83512200 0.21519600  
1 10.90375400 13.95071900 0.12706000  
1 1.41091200 -11.94890900 0.20690800  
1 0.15185700 -14.01681600 0.27350100  
1 -6.62387700 -16.42222800 0.11240000  
1 -4.16977200 -16.44068100 0.20232400  
1 -12.15016200 -11.83543500 -0.21706800  
1 -10.90625400 -13.95103100 -0.12893000  
1 12.21125100 6.88029800 0.28008400  
1 11.05089900 4.75577600 0.21116900  
1 10.09249300 3.05883000 0.23615800  
1 8.92483300 0.97691100 0.18509200  
1 7.96144100 -0.71539900 0.18534500  
1 6.77552600 -2.78896000 0.16811500  
1 5.80427900 -4.47207000 0.16757500  
1 4.60244500 -6.53650500 0.18382900  
1 3.61913700 -8.21748300 0.18303200  
1 2.40073400 -10.27024600 0.23282200  
1 -11.05340000 -4.75608800 -0.21304400  
1 -12.21375200 -6.88061100 -0.28195800  
1 -8.92733400 -0.97722300 -0.18696800  
1 -10.09499300 -3.05914200 -0.23803300  
1 -6.77802600 2.78864800 -0.16999100  
1 -7.96394100 0.71508600 -0.18722100  
1 -4.60494400 6.53619200 -0.18570900  
1 -5.80677800 4.47175700 -0.16945500  
1 -2.40323300 10.26993300 -0.23469800  
1 -3.62163600 8.21717100 -0.18491000

25. [34]clarene

<2,4,10,4,2,12>

E(wB97XD/cc-pVDZ) = -5222.46372973  
No imaginary frequency (B3LYP/6-31G\*)

6 3.32595400 13.76886800 0.00500400

6 2.64472200 15.02188800 0.00485300  
6 1.25135800 15.03684800 0.00503700  
6 0.49702800 13.85424100 0.00542800  
6 1.16922400 12.60177800 0.00575000  
6 2.57005300 12.60167300 0.00548800  
6 7.62403500 13.76113900 0.00397400  
6 6.90135900 14.96277800 0.00405000  
6 5.50769400 14.98426600 0.00434200  
6 4.79453600 13.74978300 0.00463700  
6 5.52022800 12.56295900 0.00452000  
6 6.92007100 12.52681900 0.00417200  
6 11.95558800 6.35098400 0.00295800  
6 11.25957900 7.56257800 0.00316800  
6 9.83479100 7.54947900 0.00345100  
6 9.18302800 6.31458600 0.00353700  
6 9.86707900 5.09629000 0.00336400  
6 11.29168400 5.12048000 0.00303300  
6 1.20654500 -12.33267300 0.00039800  
6 0.51617000 -11.08626300 0.00088400  
6 -0.88096700 -11.10166300 0.00086000  
6 -1.62549900 -12.28296100 0.00042500  
6 -0.92543200 -13.52396700 -0.00007000  
6 0.47184800 -13.52223400 -0.00002000  
6 -7.39349700 -12.24236200 0.00031800  
6 -8.12405100 -11.04770400 0.00072600  
6 -9.51469900 -11.01184900 0.00068100  
6 -10.22825000 -12.24601900 0.00014400  
6 -9.51356900 -13.44267800 -0.00023500  
6 -8.11159400 -13.46858700 -0.00014700  
6 -9.63041100 -8.51138000 0.00182400  
6 -10.32966600 -7.29756900 0.00218700  
6 -11.75046200 -7.34035200 0.00180700  
6 -12.39871600 -8.58432200 0.00118000  
6 -11.69026200 -9.78422900 0.00085400  
6 -10.26448500 -9.74897200 0.00113100  
6 9.80484600 10.03923200 0.00353500  
6 9.07600100 11.28463500 0.00370800  
6 7.66564700 11.27415700 0.00399100  
6 6.99929100 10.02313500 0.00406100  
6 7.68947600 8.84546300 0.00388700  
6 9.10652000 8.81521000 0.00363100  
6 9.90247700 2.61069500 0.00307800  
6 9.17294100 3.81297000 0.00347000  
6 7.75339300 3.74433700 0.00398400  
6 7.09250500 2.55261800 0.00404300  
6 7.79153500 1.31381400 0.00354200  
6 9.20367700 1.34426200 0.00304700  
6 7.79634800 -1.16586100 0.00289200  
6 7.08479100 0.05006500 0.00350200  
6 5.65973000 -0.00220100 0.00405900  
6 4.98685300 -1.18452900 0.00396400  
6 5.67004600 -2.43632200 0.00328300  
6 7.07991400 -2.42625900 0.00276100  
6 5.64195400 -4.91535100 0.00238100  
6 4.94641600 -3.68898100 0.00309200  
6 3.52074000 -3.72226200 0.00358500  
6 2.83249600 -4.89568400 0.00331500  
6 3.49903800 -6.15633300 0.00254200  
6 4.90790900 -6.16558900 0.00212400  
6 3.43585800 -8.63830700 0.00152000  
6 2.75710900 -7.39968000 0.00218000  
6 1.33474800 -7.41237500 0.00243400  
6 0.63212700 -8.57994800 0.00201400  
6 1.28151400 -9.84414900 0.00135500  
6 2.68751600 -9.87605900 0.00117500  
6 -3.08577400 -12.28403400 0.00039400  
6 -3.81942100 -11.07135300 0.00076600  
6 -5.18441100 -11.06116100 0.00074100

|   |              |              |             |   |              |              |             |
|---|--------------|--------------|-------------|---|--------------|--------------|-------------|
| 6 | -5.93582300  | -12.26302300 | 0.00034400  | 1 | 3.08865000   | 11.64827700  | 0.00561500  |
| 6 | -5.24079000  | -13.49032700 | -0.00004900 | 1 | 7.44848900   | 15.90911800  | 0.00384500  |
| 6 | -3.79778700  | -13.50020900 | -0.00002600 | 1 | 4.97722500   | 11.62323000  | 0.00467400  |
| 6 | -7.58333800  | -4.72808000  | 0.00416400  | 1 | 13.04856400  | 6.36540600   | 0.00270000  |
| 6 | -8.29584700  | -3.49632900  | 0.00432400  | 1 | 8.09825300   | 6.29998500   | 0.00369200  |
| 6 | -9.70723300  | -3.54035600  | 0.00372100  | 1 | -1.40977800  | -10.15429900 | 0.00115300  |
| 6 | -10.39356700 | -4.81457800  | 0.00309800  | 1 | 1.00501800   | -14.47644500 | -0.00038800 |
| 6 | -9.65048000  | -6.00936300  | 0.00291100  | 1 | -7.58194800  | -10.10745300 | 0.00105400  |
| 6 | -8.23110500  | -5.92607700  | 0.00345000  | 1 | -10.06016500 | -14.38932600 | -0.00063900 |
| 6 | -5.51383200  | -0.97487100  | 0.00642400  | 1 | -8.54544700  | -8.48506500  | 0.00208800  |
| 6 | -6.20782500  | 0.27101300   | 0.00618900  | 1 | -13.49151100 | -8.61121200  | 0.00093100  |
| 6 | -7.61757200  | 0.24959700   | 0.00541600  | 1 | 5.91201200   | 9.97952000   | 0.00422400  |
| 6 | -8.32349300  | -1.01702600  | 0.00488900  | 1 | 7.11980400   | 7.91833000   | 0.00393500  |
| 6 | -7.60113100  | -2.22660300  | 0.00501600  | 1 | 7.16117900   | 4.65730900   | 0.00438100  |
| 6 | -6.17652900  | -2.16251700  | 0.00583700  | 1 | 6.00498300   | 2.57111400   | 0.00446300  |
| 6 | -3.38818800  | 2.74905700   | 0.00780600  | 1 | 5.07753500   | 0.91662600   | 0.00458100  |
| 6 | -4.06342800  | 4.00550100   | 0.00724600  | 1 | 3.89957400   | -1.15326900  | 0.00441400  |
| 6 | -5.47309600  | 4.00581200   | 0.00650400  | 1 | 2.95069900   | -2.79585800  | 0.00418600  |
| 6 | -6.19860700  | 2.74983500   | 0.00622900  | 1 | 1.74569800   | -4.85033500  | 0.00372600  |
| 6 | -5.49414300  | 1.52885100   | 0.00665600  | 1 | 0.77619500   | -6.47901200  | 0.00293900  |
| 6 | -4.06839000  | 1.57160800   | 0.00751400  | 1 | -0.45459500  | -8.52281900  | 0.00222800  |
| 6 | -1.20627900  | 6.43994100   | 0.00797400  | 1 | -3.30025200  | -10.11503700 | 0.00106400  |
| 6 | -1.86222500  | 7.70619600   | 0.00724600  | 1 | -5.68931300  | -10.09721900 | 0.00101800  |
| 6 | -3.27101200  | 7.72815800   | 0.00670500  | 1 | -6.49575100  | -4.73475800  | 0.00455100  |
| 6 | -4.01588300  | 6.48402800   | 0.00674000  | 1 | -7.62945500  | -6.83277400  | 0.00331500  |
| 6 | -3.33033100  | 5.25206500   | 0.00736400  | 1 | -4.42642300  | -0.99725900  | 0.00704100  |
| 6 | -1.90437600  | 5.27279300   | 0.00804100  | 1 | -5.58657500  | -3.07629100  | 0.00604000  |
| 6 | 1.02864200   | 10.09884700  | 0.00694000  | 1 | -2.30121900  | 2.71074700   | 0.00846300  |
| 6 | 0.39208500   | 11.37023700  | 0.00626500  | 1 | -3.49212000  | 0.64916900   | 0.00796100  |
| 6 | -1.01413900  | 11.41771200  | 0.00612900  | 1 | -0.11999500  | 6.38516500   | 0.00850100  |
| 6 | -1.77552700  | 10.18690700  | 0.00639300  | 1 | -1.34238400  | 4.34154900   | 0.00860900  |
| 6 | -1.10899300  | 8.94205400   | 0.00701800  | 1 | 2.11466900   | 10.03055500  | 0.00721200  |
| 6 | 0.31402300   | 8.93951700   | 0.00734500  | 1 | 0.86246700   | 8.00028300   | 0.00788600  |
| 6 | -0.93824600  | 13.86380200  | 0.00548300  | 1 | -1.45399900  | 14.82636300  | 0.00526500  |
| 6 | -1.65309000  | 12.70923500  | 0.00575100  | 1 | -2.74001100  | 12.77281100  | 0.00575300  |
| 6 | 4.76788600   | 16.22959000  | 0.00430300  | 1 | 5.33315600   | 17.16406200  | 0.00406200  |
| 6 | 3.41688000   | 16.24738600  | 0.00450300  | 1 | 2.87633500   | 17.19637300  | 0.00441700  |
| 6 | 11.93598200  | 8.83140700   | 0.00307300  | 1 | 13.02798100  | 8.83905800   | 0.00284400  |
| 6 | 11.24858900  | 10.00003600  | 0.00324500  | 1 | 11.81232800  | 10.93124500  | 0.00314600  |
| 6 | 3.34293500   | -11.16125400 | 0.00066700  | 1 | 4.43051100   | -11.21103800 | 0.00059300  |
| 6 | 2.64342200   | -12.32348900 | 0.00033000  | 1 | 3.17065200   | -13.27978700 | -0.00001500 |
| 6 | -7.37083000  | -14.69895400 | -0.00053900 | 1 | -7.92390400  | -15.64058300 | -0.00089200 |
| 6 | -6.01375300  | -14.70849100 | -0.00048600 | 1 | -5.50429100  | -15.67045200 | -0.00079900 |
| 6 | -12.36658500 | -11.06513500 | 0.00025700  | 1 | -13.45871300 | -11.07065900 | 0.00006700  |
| 6 | -11.67661500 | -12.22679800 | -0.00004400 | 1 | -12.20409400 | -13.18311900 | -0.00047400 |
| 6 | 9.74571100   | 12.56249600  | 0.00356800  | 1 | 10.83360100  | 12.60093000  | 0.00334500  |
| 6 | 9.05994700   | 13.73360000  | 0.00367800  | 1 | 9.59974800   | 14.68290300  | 0.00353700  |
| 6 | 12.00108000  | 3.87088700   | 0.00274900  | 1 | 13.09289000  | 3.89152200   | 0.00252000  |
| 6 | 11.34327000  | 2.68453500   | 0.00273700  | 1 | 11.92959800  | 1.76722000   | 0.00250300  |
| 6 | 9.89108500   | 0.09022100   | 0.00248000  | 1 | 10.97947700  | 0.06648000   | 0.00205000  |
| 6 | 9.22410500   | -1.09887000  | 0.00239100  | 1 | 9.81123500   | -2.01583400  | 0.00191300  |
| 6 | 7.75196500   | -3.68667900  | 0.00207900  | 1 | 8.84021300   | -3.72277600  | 0.00165900  |
| 6 | 7.06954600   | -4.86792100  | 0.00190000  | 1 | 7.64462100   | -5.79248400  | 0.00134800  |
| 6 | 5.56283200   | -7.43609200  | 0.00142800  | 1 | 6.65049700   | -7.48682400  | 0.00108600  |
| 6 | 4.86559600   | -8.60770700  | 0.00116600  | 1 | 5.42956500   | -9.53888300  | 0.00061700  |
| 6 | -3.04284500  | -14.73151500 | -0.00044600 | 1 | -3.56781300  | -15.68510500 | -0.00079600 |
| 6 | -1.68707500  | -14.74347700 | -0.00044100 | 1 | -1.14842400  | -15.69341000 | -0.00078100 |
| 6 | -11.83161600 | -4.90570100  | 0.00267400  | 1 | -12.42934200 | -3.99567000  | 0.00287100  |
| 6 | -12.47518400 | -6.10147500  | 0.00209100  | 1 | -13.56668700 | -6.13513000  | 0.00181600  |
| 6 | -9.75039200  | -1.09740300  | 0.00421300  | 1 | -10.34601000 | -0.18586300  | 0.00411200  |
| 6 | -10.40630400 | -2.29307300  | 0.00370300  | 1 | -11.49494500 | -2.27983400  | 0.00320500  |
| 6 | -7.62564300  | 2.69140300   | 0.00547700  | 1 | -8.20777900  | 3.61158800   | 0.00516800  |
| 6 | -8.29916800  | 1.50471600   | 0.00511700  | 1 | -9.38771400  | 1.53234000   | 0.00453300  |
| 6 | -5.44367000  | 6.44752700   | 0.00609300  | 1 | -6.01153200  | 7.37660400   | 0.00563900  |
| 6 | -6.13529500  | 5.27128400   | 0.00597900  | 1 | -7.22327000  | 5.31581700   | 0.00543700  |
| 6 | -3.20524200  | 10.16989100  | 0.00595600  | 1 | -3.76021100  | 11.10653900  | 0.00543200  |
| 6 | -3.91377900  | 9.00464400   | 0.00607300  | 1 | -5.00095700  | 9.06565500   | 0.00565200  |
| 1 | 0.72916200   | 15.99718000  | 0.00484700  |   |              |              |             |

26. [36]clarene

<2,2,14,2,2,14>

E(wB97XD/cc-pVDZ) = -5529.67607227  
 No imaginary frequency (B3LYP/6-31G\*)

6 5.72155700 14.89662300 -0.02183400  
 6 5.02823700 16.13859500 -0.10512600  
 6 3.63389900 16.13133900 -0.14957600  
 6 2.89736700 14.93817500 -0.09953900  
 6 3.58556300 13.69963300 0.02361000  
 6 4.98298400 13.72081900 0.05227600  
 6 10.01479900 14.89837600 0.03687700  
 6 9.29456900 16.09805600 0.00201800  
 6 7.89552000 16.12200400 -0.03315400  
 6 7.18561400 14.89128000 -0.01477100  
 6 7.91222800 13.70392200 0.00138900  
 6 9.30380900 13.66831300 0.01792700  
 6 12.15339000 11.21226100 0.15193600  
 6 11.46262200 12.42349400 0.10800100  
 6 10.04041000 12.40302300 0.02473000  
 6 9.39132600 11.17554100 -0.04959400  
 6 10.07154800 9.95465200 -0.02141200  
 6 11.48825100 9.97788100 0.10153400  
 6 -2.89736800 -14.93817600 0.10397700  
 6 -3.58556400 -13.69963300 -0.01916400  
 6 -4.98298400 -13.72081800 -0.04782400  
 6 -5.72155800 -14.89662200 0.02627700  
 6 -5.02823800 -16.13859500 0.10956300  
 6 -3.63390000 -16.13133900 0.15401100  
 6 -7.18561500 -14.89127900 0.01921100  
 6 -7.91222900 -13.70392200 0.00304500  
 6 -9.30381000 -13.66831300 -0.01348900  
 6 -10.01480000 -14.89837500 -0.03243400  
 6 -9.29457000 -16.09805500 0.00242700  
 6 -7.89552100 -16.12200300 0.03759800  
 6 -9.39132600 -11.17554100 0.05403500  
 6 -10.07154800 -9.95465200 0.02585000  
 6 -11.48825100 -9.97788100 -0.09710000  
 6 -12.15339000 -11.21226000 -0.14750300  
 6 -11.46262300 -12.42349300 -0.10356500  
 6 -10.04041100 -12.40302300 -0.02029200  
 6 10.08899400 7.47425900 0.00104900  
 6 9.37273300 8.67947500 -0.10105900  
 6 7.96390800 8.61925200 -0.28764300  
 6 7.29840000 7.43187400 -0.35109600  
 6 7.97956900 6.18965200 -0.21830700  
 6 9.38101800 6.21348900 -0.03965900  
 6 7.96108400 3.71564500 -0.09490500  
 6 7.26620500 4.92980800 -0.25806600  
 6 5.85443900 4.87454200 -0.45984200  
 6 5.17901600 3.69244500 -0.48751800  
 6 5.84464300 2.44329200 -0.30837500  
 6 7.24113200 2.45885500 -0.11175000  
 6 5.81043000 -0.02702100 -0.12981800  
 6 5.12296000 1.18820600 -0.32237800  
 6 3.71129600 1.13440700 -0.52814100  
 6 3.03113900 -0.04568300 -0.53513700  
 6 3.69124200 -1.29537400 -0.33472000  
 6 5.08658600 -1.28155500 -0.13337600  
 6 3.65293700 -3.76463200 -0.13298100  
 6 2.96724500 -2.54941200 -0.33454700  
 6 1.55492200 -2.60262100 -0.53479800  
 6 0.87293700 -3.78165100 -0.52735500  
 6 1.53219300 -5.03106300 -0.32141200  
 6 2.92843100 -5.01878400 -0.12906200  
 6 1.49086900 -7.50069600 -0.11019400

6 0.80612600 -6.28360800 -0.30705800  
 6 -0.60848400 -6.33174300 -0.48607900  
 6 -1.29457200 -7.50766700 -0.45800200  
 6 -0.63655300 -8.75790600 -0.25601900  
 6 0.76245200 -8.75258900 -0.09298000  
 6 -0.69085500 -11.23115200 -0.03712900  
 6 -1.37089800 -10.00560000 -0.21599200  
 6 -2.78725500 -10.03672600 -0.34875500  
 6 -3.48288800 -11.20669300 -0.28524000  
 6 -2.83063900 -12.45689600 -0.09864100  
 6 -1.42873900 -12.47463200 0.00370800  
 6 -7.29840100 -7.43187400 0.35554300  
 6 -7.97956900 -6.18965200 0.22275000  
 6 -9.38101700 -6.21348900 0.04409600  
 6 -10.08899400 -7.47425900 0.00338700  
 6 -9.37273300 -8.67947500 0.10549900  
 6 -7.96390800 -8.61925200 0.29208800  
 6 -5.17901800 -3.69244500 0.49197100  
 6 -5.84464300 -2.44329200 0.31282200  
 6 -7.24113200 -2.45885500 0.11619000  
 6 -7.96108300 -3.71564500 0.09934300  
 6 -7.26620500 -4.92980900 0.26251100  
 6 -5.85444000 -4.87454200 0.46429400  
 6 -3.03114000 0.04568300 0.53959000  
 6 -3.69124100 1.29537400 0.33917000  
 6 -5.08658400 1.28155400 0.13782100  
 6 -5.81042900 0.02702100 0.13426100  
 6 -5.12296000 -1.18820600 0.32682600  
 6 -3.71129600 -1.13440700 0.53259300  
 6 -0.87293600 3.78165000 0.53180800  
 6 -1.53219200 5.03106300 0.32586600  
 6 -2.92842900 5.01878400 0.13351600  
 6 -3.65293600 3.76463100 0.13743100  
 6 -2.96724400 2.54941100 0.33899800  
 6 -1.55492100 2.60262000 0.53925100  
 6 1.29457300 7.50766700 0.46245400  
 6 0.63655300 8.75790600 0.26047200  
 6 -0.76245100 8.75258900 0.09743400  
 6 -1.49086900 7.50069600 0.11465000  
 6 -0.80612500 6.28360700 0.31151200  
 6 0.60848600 6.33174300 0.49053100  
 6 3.48288700 11.20669400 0.28969200  
 6 2.83063900 12.45689700 0.10309000  
 6 1.42873900 12.47463200 0.00073900  
 6 0.69085500 11.23115200 0.04157900  
 6 1.37089800 10.00560000 0.22044400  
 6 2.78725500 10.03672700 0.35320800  
 6 1.46358700 14.91755200 -0.17251300  
 6 0.77062000 13.75016400 -0.13697700  
 6 7.14689800 17.36003200 -0.09337700  
 6 5.79435700 17.36715900 -0.13854700  
 6 12.14364900 13.70120300 0.14193600  
 6 11.46125700 14.86900200 0.09718100  
 6 -0.77062000 -13.75016500 0.14141700  
 6 -1.46358800 -14.91755300 0.17694900  
 6 -7.14689900 -17.36003200 0.09782000  
 6 -5.79435700 -17.36715900 0.14298300  
 6 -12.14365000 -13.70120300 -0.13749900  
 6 -11.46125800 -14.86900100 -0.09273900  
 6 12.18726900 8.72583100 0.17405700  
 6 11.52271100 7.54204000 0.13845000  
 6 10.05167100 4.96006500 0.10606500  
 6 9.37735100 3.77620800 0.08550900  
 6 7.90351600 1.20805800 0.07222100  
 6 7.22344800 0.02743700 0.06595100  
 6 5.74638400 -2.53136300 0.06545200  
 6 5.06521200 -3.71110000 0.06567300  
 6 3.58778900 -6.26970700 0.06687400

6 2.90529000 -7.44892400 0.07358800  
6 1.41812200 -10.00938600 0.08766700  
6 0.72995000 -11.18524600 0.10856500  
6 -11.52271000 -7.54204000 -0.13401800  
6 -12.18726900 -8.72583100 -0.16962600  
6 -9.37735000 -3.77620900 -0.08107700  
6 -10.05167000 -4.96006600 -0.10163500  
6 -7.22344700 -0.02743700 -0.06151300  
6 -7.90351400 -1.20805800 -0.06778500  
6 -5.06521000 3.71110000 -0.06122800  
6 -5.74638200 2.53136300 -0.06100900  
6 -2.90529000 7.44892400 -0.06912900  
6 -3.58778900 6.26970600 -0.06241500  
6 -0.72995100 11.18524500 -0.10411400  
6 -1.41812200 10.00938500 -0.08321400  
1 3.09785800 17.08079200 -0.22791300  
1 5.51320000 12.77769700 0.13116100  
1 9.84121600 17.04478500 0.00220500  
1 7.36979600 12.76440900 0.00099500  
1 13.24367100 11.22263700 0.23021200  
1 8.30945800 11.16333800 -0.12820600  
1 -5.51320000 -12.77769500 -0.12669500  
1 -3.09785900 -17.08079200 0.23234400  
1 -7.36979800 -12.76440800 0.00342700  
1 -9.84121700 -17.04478400 0.00224000  
1 -8.30945900 -11.16333900 0.13265300  
1 -13.24367100 -11.22263600 -0.22578200  
1 7.38666500 9.53515300 -0.39923500  
1 6.22147300 7.45500000 -0.50455100  
1 5.28568700 5.79085800 -0.60491400  
1 4.10348600 3.72064000 -0.65182700  
1 3.14707800 2.05084400 -0.69071600  
1 1.95602100 -0.01615100 -0.70248500  
1 0.99161800 -1.68646800 -0.70244000  
1 -0.20288300 -3.75143200 -0.68962100  
1 -1.17080800 -5.41454000 -0.65065400  
1 -2.37253900 -7.47335800 -0.60280800  
1 -3.34572000 -9.11561600 -0.50221200  
1 -4.56472000 -11.16462900 -0.39666800  
1 -6.22147500 -7.45500100 0.50900200  
1 -7.38666600 -9.53515400 0.40368300  
1 -4.10348800 -3.72064000 0.65628600  
1 -5.28568900 -5.79085700 0.60937200  
1 -1.95602200 0.01615100 0.70694200  
1 -3.14708000 -2.05084400 0.69517000  
1 0.20288400 3.75143100 0.69407500  
1 -0.99161800 1.68646700 0.70689300  
1 2.37254000 7.47335900 0.60725800  
1 1.17081000 5.41454000 0.65510300  
1 4.56472000 11.16463000 0.40112000  
1 3.34572000 9.11561800 0.50666700  
1 0.93118300 15.86640400 -0.26591900  
1 -0.31534600 13.79121500 -0.20321100  
1 7.70347800 18.29961500 -0.11087000  
1 5.25001200 18.31235100 -0.19460800  
1 13.23438000 13.70230000 0.19811300  
1 11.99674300 15.82076100 0.11510100  
1 0.31534600 -13.79121600 0.20764800  
1 -0.93118300 -15.86640500 0.27034700  
1 -7.70347900 -18.29961400 0.11531400  
1 -5.25001300 -18.31235100 0.19904100  
1 -13.23438000 -13.70229900 -0.19367800  
1 -11.99674400 -15.82076100 -0.11065600  
1 13.27523600 8.73912400 0.26714600  
1 12.10148100 6.62225400 0.20425700  
1 11.13058700 4.93337000 0.24836500  
1 9.95008600 2.85891200 0.20941600  
1 8.98041300 1.17900600 0.22767600

1 7.78936400 -0.89006000 0.21552800  
1 6.82261300 -2.56109000 0.22439500  
1 5.62923000 -4.62812200 0.22489200  
1 4.66538200 -6.30084000 0.21616300  
1 3.46903100 -8.36688500 0.22926200  
1 2.49895000 -10.04650300 0.21141900  
1 1.29261300 -12.10615900 0.25106100  
1 -12.10147900 -6.62225300 -0.19982700  
1 -13.27523500 -8.73912400 -0.26271800  
1 -9.95008300 -2.85891300 -0.20499100  
1 -11.13058400 -4.93337100 -0.24394100  
1 -7.78936200 0.89005900 -0.21109400  
1 -8.98041100 -1.17900700 -0.22324500  
1 -5.62922700 4.62812200 -0.22045000  
1 -6.82261100 2.56109000 -0.21995700  
1 -3.46903200 8.36688500 -0.22479800  
1 -4.66538200 6.30084000 -0.21170000  
1 -1.29261400 12.10615800 -0.24661100  
1 -2.49895000 10.04650200 -0.20696500

## 27. [38]clarene

<2,4,12,4,2,14>

E(wB97XD/cc-pVDZ) = -5836.87344197  
No imaginary frequency (B3LYP/6-31G\*)

6 4.36871000 15.64473400 -0.00049500  
6 3.68963800 16.89906800 -0.00118300  
6 2.29651900 16.91681900 -0.00116800  
6 1.53994900 15.73593400 -0.00046400  
6 2.20931000 14.48186400 0.00036900  
6 3.61035700 14.47885400 0.00032000  
6 8.66695300 15.63464000 -0.00131100  
6 7.94476300 16.83628900 -0.00169000  
6 6.55131800 16.85818300 -0.00144200  
6 5.83745500 15.62396600 -0.00071300  
6 6.56289300 14.43671400 -0.00032300  
6 7.96294900 14.40025800 -0.00062900  
6 13.00835200 8.23283000 -0.00092900  
6 12.30912000 9.44229500 -0.00078900  
6 10.88429000 9.42566800 -0.00033100  
6 10.23570500 8.18884300 -0.00009100  
6 10.92327700 6.97226700 -0.00031300  
6 12.34788800 7.00074100 -0.00070800  
6 0.11120800 -14.19518000 -0.00309600  
6 -0.57634100 -12.94711100 -0.00260500  
6 -1.97372500 -12.95960500 -0.00254300  
6 -2.72067700 -14.13963300 -0.00301600  
6 -2.02279600 -15.38195300 -0.00356300  
6 -0.62574500 -15.38307500 -0.00355600  
6 -8.48961600 -14.09580800 -0.00387100  
6 -9.22136100 -12.90161600 -0.00337900  
6 -10.61226900 -12.86715200 -0.00392800  
6 -11.32439400 -14.10229100 -0.00505000  
6 -10.60865800 -15.29806700 -0.00544700  
6 -9.20690000 -15.32259300 -0.00488200  
6 -10.73350100 -10.36602200 -0.00220100  
6 -11.43619300 -9.15392900 -0.00199100  
6 -12.85694700 -9.20094800 -0.00323600  
6 -13.50178000 -10.44641700 -0.00438400  
6 -12.79024000 -11.64424000 -0.00450400  
6 -11.36443400 -11.60548700 -0.00350500  
6 10.85013400 11.91537700 -0.00070800  
6 10.11984000 13.15973400 -0.00081500  
6 8.70944400 13.14793500 -0.00036300

|   |              |              |             |   |              |              |             |
|---|--------------|--------------|-------------|---|--------------|--------------|-------------|
| 6 | 8.04477400   | 11.89593800  | 0.00029800  | 6 | -0.89481800  | 7.16282100   | 0.00486500  |
| 6 | 8.73651300   | 10.71894200  | 0.00035200  | 6 | 2.06026200   | 11.97864300  | 0.00219400  |
| 6 | 10.15365500  | 10.69023800  | -0.00021700 | 6 | 1.42842400   | 13.25246700  | 0.00117400  |
| 6 | 10.96818700  | 4.48682800   | -0.00039100 | 6 | 0.02231700   | 13.30454000  | 0.00094100  |
| 6 | 10.23380700  | 5.68622100   | -0.00020100 | 6 | -0.74334500  | 12.07661300  | 0.00160300  |
| 6 | 8.81449400   | 5.61120700   | 0.00004200  | 6 | -0.08167300  | 10.82914900  | 0.00260200  |
| 6 | 8.15867700   | 4.41644300   | 0.00005200  | 6 | 1.34138700   | 10.82169500  | 0.00290300  |
| 6 | 8.86294800   | 3.18054800   | -0.00014200 | 6 | 0.10485400   | 15.74999600  | -0.00059100 |
| 6 | 10.27493400  | 3.21756800   | -0.00030800 | 6 | -0.61321100  | 14.59767300  | 0.00003200  |
| 6 | 8.88049700   | 0.70110900   | -0.00029100 | 6 | 5.81346600   | 18.10450600  | -0.00198200 |
| 6 | 8.16244700   | 1.91313900   | -0.00018300 | 6 | 4.46267400   | 18.12384800  | -0.00189400 |
| 6 | 6.73759400   | 1.85252900   | -0.00016000 | 6 | 12.98336900  | 10.71209100  | -0.00112900 |
| 6 | 6.07133700   | 0.66621300   | -0.00025100 | 6 | 12.29388500  | 11.87925700  | -0.00111800 |
| 6 | 6.76153900   | -0.58189300  | -0.00035100 | 6 | 2.25072300   | -13.03046700 | -0.00274000 |
| 6 | 8.17139200   | -0.56319800  | -0.00035300 | 6 | 1.54795700   | -14.19050300 | -0.00314100 |
| 6 | 6.75007700   | -3.06063900  | -0.00056900 | 6 | -8.46638400  | -16.55293400 | -0.00536600 |
| 6 | 6.04612200   | -1.83935400  | -0.00046800 | 6 | -7.10950500  | -16.56233400 | -0.00496300 |
| 6 | 4.62024400   | -1.88314900  | -0.00050600 | 6 | -13.46463600 | -12.92600100 | -0.00564100 |
| 6 | 3.94021100   | -3.06131700  | -0.00065500 | 6 | -12.77265600 | -14.08624400 | -0.00584200 |
| 6 | 4.61556700   | -4.31789800  | -0.00077800 | 6 | 10.78908900  | 14.43775900  | -0.00143100 |
| 6 | 6.02525000   | -4.31653700  | -0.00072100 | 6 | 10.10273700  | 15.60828600  | -0.00166000 |
| 6 | 4.57364400   | -6.79651700  | -0.00110700 | 6 | 13.06204500  | 5.75404600   | -0.00089900 |
| 6 | 3.88466600   | -5.56638300  | -0.00097000 | 6 | 12.40865100  | 4.56549100   | -0.00073200 |
| 6 | 2.45870500   | -5.59275900  | -0.00104700 | 6 | 10.96875900  | 1.96716200   | -0.00039000 |
| 6 | 1.76454500   | -6.76292700  | -0.00123900 | 6 | 10.30781600  | 0.77494800   | -0.00036400 |
| 6 | 2.42468800   | -8.02708300  | -0.00139300 | 6 | 8.85180700   | -1.81885300  | -0.00043400 |
| 6 | 3.83345100   | -8.04288600  | -0.00134100 | 6 | 8.17708600   | -3.00433200  | -0.00053200 |
| 6 | 2.35132900   | -10.50869200 | -0.00192200 | 6 | 6.69030300   | -5.58039300  | -0.00083500 |
| 6 | 1.67739500   | -9.26740900  | -0.00163500 | 6 | 6.00126200   | -6.75761500  | -0.00101900 |
| 6 | 0.25492800   | -9.27519200  | -0.00159700 | 6 | 4.48317600   | -9.31592500  | -0.00155100 |
| 6 | -0.45194800  | -10.44044100 | -0.00186300 | 6 | 3.78110400   | -10.48439600 | -0.00184400 |
| 6 | 0.19277900   | -11.70712000 | -0.00223200 | 6 | -4.14109600  | -16.58700400 | -0.00428600 |
| 6 | 1.59870800   | -11.74362100 | -0.00227700 | 6 | -2.78553500  | -16.60060300 | -0.00414900 |
| 6 | -4.18111700  | -14.13905300 | -0.00305700 | 6 | -12.94724900 | -6.76711300  | -0.00235400 |
| 6 | -4.91428000  | -12.92600700 | -0.00240200 | 6 | -13.58637800 | -7.96502000  | -0.00333500 |
| 6 | -6.27946800  | -12.91503900 | -0.00258400 | 6 | -10.88452300 | -2.95186000  | 0.00025700  |
| 6 | -7.03176400  | -14.11643200 | -0.00347500 | 6 | -11.53432800 | -4.15060400  | -0.00051600 |
| 6 | -6.33701500  | -15.34395900 | -0.00404800 | 6 | -8.78381500  | 0.84716600   | 0.00198300  |
| 6 | -4.89419200  | -15.35465400 | -0.00378900 | 6 | -9.44953400  | -0.34366000  | 0.00154200  |
| 6 | -8.69996600  | -6.57234900  | 0.00210900  | 6 | -6.63175100  | 4.61688700   | 0.00268600  |
| 6 | -9.41769100  | -5.34357400  | 0.00157200  | 6 | -7.31371100  | 3.43522400   | 0.00259400  |
| 6 | -10.82885800 | -5.39419000  | 0.00003800  | 6 | -4.42774300  | 8.35677700   | 0.00236800  |
| 6 | -11.50958800 | -6.67119400  | -0.00099300 | 6 | -5.12605600  | 7.18475600   | 0.00258600  |
| 6 | -10.76167100 | -7.86304900  | -0.00066200 | 6 | -2.17306200  | 12.06590900  | 0.00123500  |
| 6 | -9.34260400  | -7.77335100  | 0.00100400  | 6 | -2.88641200  | 10.90386500  | 0.00171200  |
| 6 | -6.64899000  | -2.80612100  | 0.00476600  | 1 | 1.77625200   | 17.87818800  | -0.00174200 |
| 6 | -7.35002100  | -1.56410700  | 0.00383500  | 1 | 4.12700900   | 13.52428200  | 0.00091700  |
| 6 | -8.75960500  | -1.59411400  | 0.00239000  | 1 | 8.49217300   | 17.78245700  | -0.00223800 |
| 6 | -9.45811500  | -2.86457200  | 0.00173400  | 1 | 6.01951800   | 13.49707100  | 0.00017700  |
| 6 | -8.72924000  | -4.07022500  | 0.00248800  | 1 | 14.10127500  | 8.25023700   | -0.00125100 |
| 6 | -7.30495400  | -3.99776500  | 0.00411000  | 1 | 9.15083500   | 8.17130200   | 0.00025400  |
| 6 | -4.54713500  | 0.93435000   | 0.00582200  | 1 | -2.50075600  | -12.01110200 | -0.00214400 |
| 6 | -5.23132300  | 2.18612600   | 0.00474900  | 1 | -0.09450300  | -16.33835300 | -0.00395300 |
| 6 | -6.64101100  | 2.17555800   | 0.00356600  | 1 | -8.68009700  | -11.96074700 | -0.00260200 |
| 6 | -7.35726900  | 0.91453700   | 0.00330200  | 1 | -11.15432100 | -16.24524400 | -0.00627500 |
| 6 | -6.64444700  | -0.30150800  | 0.00427500  | 1 | -9.64847600  | -10.33689700 | -0.00137200 |
| 6 | -5.21894300  | -0.24817700  | 0.00560300  | 1 | -14.59448900 | -10.47620900 | -0.00524300 |
| 6 | -2.39439500  | 4.64567200   | 0.00566500  | 1 | 6.95748200   | 11.85119200  | 0.00076700  |
| 6 | -3.06134800  | 5.90665400   | 0.00450800  | 1 | 8.16811000   | 9.79097000   | 0.00085900  |
| 6 | -4.47096100  | 5.91569100   | 0.00362200  | 1 | 8.21837600   | 6.52169600   | 0.00018500  |
| 6 | -5.20453100  | 4.66464600   | 0.00372400  | 1 | 7.07101800   | 4.43000300   | 0.00022000  |
| 6 | -4.50843700  | 3.43879400   | 0.00479200  | 1 | 6.15039500   | 2.76826100   | -0.00010700 |
| 6 | -3.08231000  | 3.47247000   | 0.00581800  | 1 | 4.98383400   | 0.69119800   | -0.00026000 |
| 6 | -0.19076900  | 8.32665800   | 0.00438100  | 1 | 4.04389200   | -0.96058800  | -0.00043000 |
| 6 | -0.84024600  | 9.59634500   | 0.00323200  | 1 | 2.85306000   | -3.02376600  | -0.00069200 |
| 6 | -2.24888400  | 9.62486300   | 0.00269100  | 1 | 1.89343100   | -4.66335700  | -0.00096600 |
| 6 | -2.99986100  | 8.38470600   | 0.00310400  | 1 | 0.67790100   | -6.71244600  | -0.00131400 |
| 6 | -2.32094200  | 7.14908100   | 0.00418600  | 1 | -0.30014000  | -8.33967800  | -0.00134200 |

1 -1.53853400 -10.37966200 -0.00182400  
 1 -4.39437400 -11.97003100 -0.00172800  
 1 -6.78395700 -11.95082600 -0.00205800  
 1 -7.61228900 -6.57402400 0.00339400  
 1 -8.73703200 -8.67748900 0.00150400  
 1 -5.56139900 -2.82204600 0.00602600  
 1 -6.70984000 -4.90826800 0.00487000  
 1 -3.45985200 0.90390600 0.00683800  
 1 -4.63626400 -1.16667600 0.00643500  
 1 -1.30760500 4.60065800 0.00645900  
 1 -2.51216500 2.54614900 0.00671100  
 1 0.89531200 8.26667700 0.00491700  
 1 -0.33768400 6.22857900 0.00574400  
 1 3.14610500 11.90661800 0.00245000  
 1 1.88634100 9.88036100 0.00366200  
 1 -0.40784600 16.71417800 -0.00124600  
 1 -1.69989300 14.66435300 -0.00014600  
 1 6.38015200 19.03810900 -0.00250900  
 1 3.92286200 19.07324100 -0.00235100  
 1 14.07534600 10.72150500 -0.00143000  
 1 12.85589700 12.81143400 -0.00140700  
 1 3.33809200 -13.08340100 -0.00282300  
 1 2.07215700 -15.14845800 -0.00352800  
 1 -9.01961100 -17.49446500 -0.00609800  
 1 -6.59999600 -17.52420200 -0.00538900  
 1 -14.55674600 -12.93309900 -0.00631900  
 1 -13.29802900 -15.04371300 -0.00667700  
 1 11.87689700 14.47686100 -0.00175100  
 1 10.64172500 16.55804200 -0.00214800  
 1 14.15375700 5.77895500 -0.00120200  
 1 12.99826200 3.65034900 -0.00091100  
 1 12.05719200 1.94872100 -0.00045000  
 1 10.89948800 -0.13903100 -0.00041700  
 1 9.94021500 -1.84786900 -0.00041300  
 1 8.75809900 -3.92510900 -0.00058900  
 1 7.77827600 -5.62270900 -0.00077600  
 1 6.57090600 -7.68548700 -0.00109500  
 1 5.57056300 -9.37125800 -0.00149200  
 1 4.34119200 -11.41784000 -0.00199300  
 1 -4.66723300 -17.53988900 -0.00476100  
 1 -2.24777900 -17.55103400 -0.00451800  
 1 -13.54819300 -5.85926900 -0.00255300  
 1 -14.67773400 -8.00293800 -0.00429200  
 1 -11.48468300 -2.04336200 -0.00028700  
 1 -12.62296000 -4.14268300 -0.00165200  
 1 -9.37183300 1.76354000 0.00125600  
 1 -10.53818200 -0.32310000 0.00047900  
 1 -7.20717100 5.54123000 0.00189500  
 1 -8.40197400 3.47075400 0.00173300  
 1 -4.99002700 9.28919400 0.00155100  
 1 -6.21369900 7.23559200 0.00193700  
 1 -2.72416200 13.00476900 0.00051500  
 1 -3.97327200 10.96946100 0.00134800

6 5.21476200 13.52536700 0.56804300  
 6 10.18841700 14.72417400 0.88548900  
 6 9.47634300 15.93303400 0.84526500  
 6 8.07325200 15.96634200 0.82496200  
 6 7.36172000 14.73867000 0.84216000  
 6 8.07497100 13.55522200 0.95819900  
 6 9.46143200 13.50991600 0.97854600  
 6 12.17743400 10.94448500 0.60463000  
 6 11.56252100 12.18858400 0.77628100  
 6 10.15776100 12.22789900 0.99200800  
 6 9.46076400 11.03662200 1.13514400  
 6 10.05721700 9.79083900 0.95364400  
 6 11.44238900 9.74585400 0.63701000  
 6 -4.76885700 -18.58428800 0.71389000  
 6 -5.50428600 -17.41201700 1.03940600  
 6 -6.87801400 -17.52791900 1.23951100  
 6 -7.55470000 -18.73192900 1.10579400  
 6 -6.81310800 -19.92380400 0.88049100  
 6 -5.43124800 -19.82481700 0.69071700  
 6 -9.01284900 -18.77969100 1.11175000  
 6 -9.75326400 -17.60652200 1.10098400  
 6 -11.13633200 -17.58966000 1.00335600  
 6 -11.83578800 -18.82431300 0.99544900  
 6 -11.09727400 -20.01792800 1.00606800  
 6 -9.69386800 -20.02097400 1.02784500  
 6 -11.17877900 -15.12391800 0.72981900  
 6 -11.82991800 -13.90087000 0.57778700  
 6 -13.25222900 -13.89311600 0.59463600  
 6 -13.94683200 -15.10939700 0.71502600  
 6 -13.27890400 -16.33092700 0.83482700  
 6 -11.85755400 -16.32753500 0.86915800  
 6 9.82563700 7.36721600 0.52889300  
 6 9.26459200 8.57267200 0.97600400  
 6 7.90823400 8.58223400 1.40573800  
 6 7.12161200 7.47350400 1.31389600  
 6 7.61463700 6.26303600 0.75127200  
 6 8.97589500 6.20721100 0.37149600  
 6 7.24696400 3.95931100 -0.07050500  
 6 6.74823400 5.12006000 0.55047300  
 6 5.37867400 5.12899200 0.95710700  
 6 4.56712000 4.04832000 0.77619000  
 6 5.03298100 2.86070700 0.13627700  
 6 6.36890800 2.83545700 -0.31650800  
 6 4.66384800 0.57896700 -0.74620100  
 6 4.18122300 1.70268800 -0.04648700  
 6 2.86092600 1.63356400 0.49530700  
 6 2.09794100 0.50621200 0.39101100  
 6 2.56075600 -0.65435600 -0.30091700  
 6 3.83107800 -0.59148100 -0.90937600  
 6 2.28859200 -2.99115300 -1.07407300  
 6 1.78771500 -1.87996200 -0.36546200  
 6 0.53796600 -2.03128300 0.30905500  
 6 -0.13990900 -3.21679100 0.31323400  
 6 0.36100300 -4.37390100 -0.35755000  
 6 1.57026000 -4.24542800 -1.07105700  
 6 0.28235000 -6.79003500 -0.89398000  
 6 -0.30333100 -5.66127600 -0.28512500  
 6 -1.53363600 -5.84852700 0.41568100  
 6 -2.11807300 -7.07728900 0.52745800  
 6 -1.51291300 -8.25193400 -0.01607700  
 6 -0.30443000 -8.10047800 -0.72457500  
 6 -1.38480300 -10.71244200 -0.28358500  
 6 -2.07895000 -9.57239900 0.17343000  
 6 -3.33347200 -9.77089700 0.82445100  
 6 -3.85274900 -11.01760300 1.01218700  
 6 -3.15542000 -12.19478400 0.60103900  
 6 -1.90792400 -12.03822000 -0.03205100  
 6 -2.96771400 -14.66655900 0.42288200

28. [40]clarene

<2,2,16,2,2,16>

E(wB97XD/cc-pVDZ) = -6144.08950566  
 No imaginary frequency (B3LYP/6-31G\*)

6 5.90906600 14.72112700 0.69856100  
 6 5.19357700 15.94863200 0.64598900  
 6 3.80274700 15.90585200 0.51796200  
 6 3.10541600 14.69022500 0.40689400  
 6 3.83126800 13.46696700 0.40808500



|   |              |              |             |   |              |              |             |
|---|--------------|--------------|-------------|---|--------------|--------------|-------------|
| 6 | -3.70043400  | -13.52023000 | 0.80951900  | 6 | 1.47354400   | -6.60533800  | -1.65638500 |
| 6 | -4.98721800  | -13.70682700 | 1.38763700  | 6 | 0.33798700   | -9.27283600  | -1.22426700 |
| 6 | -5.54393200  | -14.94633300 | 1.48831900  | 6 | -0.16665800  | -10.51638700 | -0.99915000 |
| 6 | -4.85445800  | -16.11189700 | 1.05185500  | 6 | -1.18831600  | -13.21716800 | -0.39953800 |
| 6 | -3.53649400  | -15.98628900 | 0.58823000  | 6 | -1.68474900  | -14.46519300 | -0.17101400 |
| 6 | -8.96472800  | -11.49963800 | 0.12926300  | 6 | -13.21788100 | -11.46796700 | 0.34231300  |
| 6 | -9.61817000  | -10.23907700 | 0.03998800  | 6 | -13.91780300 | -12.62566700 | 0.47381800  |
| 6 | -11.02942400 | -10.21274500 | 0.13075100  | 6 | -10.96921800 | -7.78533100  | -0.08394700 |
| 6 | -11.77565500 | -11.44130800 | 0.29371800  | 6 | -11.67505000 | -8.94097100  | 0.05946300  |
| 6 | -11.08813200 | -12.66109200 | 0.39802400  | 6 | -8.75624200  | -4.11674100  | -0.47912700 |
| 6 | -9.66759200  | -12.65370600 | 0.30818100  | 6 | -9.45244600  | -5.27917400  | -0.35894500 |
| 6 | -6.74451000  | -7.84330900  | -0.42992800 | 6 | -6.59059400  | -0.42540200  | -0.72415800 |
| 6 | -7.39230000  | -6.57149600  | -0.46351100 | 6 | -7.27273300  | -1.60017100  | -0.66847300 |
| 6 | -8.79761900  | -6.54591300  | -0.33849800 | 6 | -4.47064900  | 3.29681600   | -0.71336900 |
| 6 | -9.54375200  | -7.77653300  | -0.18658800 | 6 | -5.13825400  | 2.11292800   | -0.74830900 |
| 6 | -8.86862000  | -9.01090400  | -0.13610900 | 6 | -2.40116000  | 7.04387200   | -0.46803500 |
| 6 | -7.44557100  | -9.00192800  | -0.26735900 | 6 | -3.05136800  | 5.85339800   | -0.57023500 |
| 6 | -4.54141900  | -4.13213100  | -0.87671000 | 6 | -0.36712800  | 10.81944400  | -0.09924900 |
| 6 | -5.19826500  | -2.86431000  | -0.83603100 | 6 | -1.00680900  | 9.62434200   | -0.22900400 |
| 6 | -6.60241900  | -2.85842300  | -0.70717400 | 1 | 3.23890800   | 16.84205900  | 0.49130700  |
| 6 | -7.33473700  | -4.10105700  | -0.60231000 | 1 | 5.77074800   | 12.59537600  | 0.57268400  |
| 6 | -6.65135100  | -5.33365300  | -0.61038300 | 1 | 10.03005400  | 16.87465900  | 0.79978900  |
| 6 | -5.23071200  | -5.30485800  | -0.76389300 | 1 | 7.52625900   | 12.62260900  | 0.99274000  |
| 6 | -2.37124500  | -0.37144300  | -1.04018900 | 1 | 13.25023000  | 10.90216900  | 0.39860600  |
| 6 | -5.16859800  | -0.38820300  | -0.82877000 | 1 | 8.39662500   | 11.07259800  | 1.33832900  |
| 6 | -4.47111600  | -1.61099500  | -0.90390100 | 1 | -7.44496100  | -16.62842500 | 1.45038300  |
| 6 | -3.04937500  | -1.55618100  | -1.03156000 | 1 | -4.85468800  | -20.72883200 | 0.47748100  |
| 6 | -3.04336800  | 0.88366800   | -0.92310100 | 1 | -9.22547600  | -16.66166100 | 1.12808500  |
| 6 | -4.45054400  | 0.86662800   | -0.83945500 | 1 | -11.63022500 | -20.97177600 | 0.96759000  |
| 6 | -0.24236200  | 3.41054600   | -0.82254100 | 1 | -10.09532800 | -15.13330800 | 0.72044100  |
| 6 | -0.93658200  | 4.65221400   | -0.68454900 | 1 | -15.03990300 | -15.09640500 | 0.70220000  |
| 6 | -2.34552900  | 4.61769700   | -0.67479000 | 1 | 7.47868300   | 9.48328500   | 1.84077800  |
| 6 | -3.04645000  | 3.35556900   | -0.75949700 | 1 | 6.09515100   | 7.53917700   | 1.66962000  |
| 6 | -2.33072100  | 2.14617100   | -0.87434700 | 1 | 4.95709600   | 6.00664200   | 1.44404200  |
| 6 | -0.90497100  | 2.22112700   | -0.91940500 | 1 | 3.53801400   | 4.11456500   | 1.12697700  |
| 6 | 1.82512000   | 7.19745700   | -0.37078800 | 1 | 2.44860400   | 2.48032400   | 1.04259400  |
| 6 | 1.11276300   | 8.43122800   | -0.25781700 | 1 | 1.11394300   | 0.50935200   | 0.85812200  |
| 6 | -0.29340300  | 8.38870400   | -0.31199800 | 1 | 0.10997700   | -1.19630700  | 0.86230800  |
| 6 | -0.97725200  | 7.12050800   | -0.44744000 | 1 | -1.07497500  | -3.26831800  | 0.86946300  |
| 6 | -0.24404200  | 5.91963600   | -0.55465300 | 1 | -2.03159100  | -5.00088300  | 0.88470700  |
| 6 | 1.18064200   | 6.00461300   | -0.51934800 | 1 | -3.05281100  | -7.14907900  | 1.08200300  |
| 6 | 3.84979000   | 10.96786400  | 0.16654300  | 1 | -3.90876000  | -8.91658200  | 1.17895200  |
| 6 | 3.13762400   | 12.19817500  | 0.23872500  | 1 | -4.81869200  | -11.09757200 | 1.50784000  |
| 6 | 1.73815100   | 12.17332600  | 0.12753000  | 1 | -5.55907000  | -12.85428700 | 1.74909000  |
| 6 | 1.05620500   | 10.90641200  | -0.02306600 | 1 | -6.53305800  | -15.03135400 | 1.93558200  |
| 6 | 1.79273600   | 9.70111100   | -0.09557900 | 1 | -7.88064600  | -11.56417600 | 0.05490100  |
| 6 | 3.21025200   | 9.77589600   | -0.00119400 | 1 | -9.10777500  | -13.58534500 | 0.36433500  |
| 6 | 1.67614100   | 14.62225700  | 0.27843500  | 1 | -5.66231100  | -7.90958200  | -0.53616500 |
| 6 | 1.03180600   | 13.43162900  | 0.15728600  | 1 | -6.88632200  | -9.93608200  | -0.25224000 |
| 6 | 7.30469800   | 17.19455600  | 0.76612500  | 1 | -3.46044000  | -4.18517100  | -1.00098000 |
| 6 | 5.94998000   | 17.18524000  | 0.70068000  | 1 | -4.66296600  | -6.23365000  | -0.80283900 |
| 6 | 12.27621600  | 13.45024500  | 0.71041800  | 1 | -1.28742600  | -0.40571300  | -1.14346500 |
| 6 | 11.63313000  | 14.64247600  | 0.78629500  | 1 | -2.47149300  | -2.47441100  | -1.12828300 |
| 6 | -2.81088200  | -17.19559600 | 0.27912500  | 1 | 0.84602300   | 3.39069900   | -0.86270000 |
| 6 | -3.38143300  | -18.42696500 | 0.37138400  | 1 | -0.31218100  | 1.31427100   | -1.03310500 |
| 6 | -8.89397700  | -21.22593600 | 0.91816000  | 1 | 2.91378900   | 7.18780700   | -0.35236400 |
| 6 | -7.54132800  | -21.17764000 | 0.82442800  | 1 | 1.78534600   | 5.10314300   | -0.61172900 |
| 6 | -13.96249400 | -17.60884400 | 0.89854500  | 1 | 4.93634600   | 10.95641500  | 0.22776400  |
| 6 | -13.28468100 | -18.78228500 | 0.95550500  | 1 | 3.81451200   | 8.87253700   | -0.06188900 |
| 6 | 12.01065400  | 8.46574300   | 0.31247300  | 1 | 1.10473400   | 15.55291400  | 0.28144600  |
| 6 | 11.23764700  | 7.34967900   | 0.22806500  | 1 | -0.05318200  | 13.44076200  | 0.06602800  |
| 6 | 9.45412900   | 4.99303900   | -0.20836900 | 1 | 7.84436200   | 18.14418000  | 0.77892600  |
| 6 | 8.62967700   | 3.93156300   | -0.43134100 | 1 | 5.39885400   | 18.12764100  | 0.66451800  |
| 6 | 6.81812500   | 1.68056700   | -1.02278100 | 1 | 13.36186500  | 13.42251000  | 0.59304500  |
| 6 | 6.00129800   | 0.61474400   | -1.24301100 | 1 | 12.20222700  | 15.57341500  | 0.73450100  |
| 6 | 4.27536900   | -1.71656700  | -1.66511000 | 1 | -1.76573400  | -17.13130000 | -0.02106300 |
| 6 | 3.53690100   | -2.85488700  | -1.75155900 | 1 | -2.79232700  | -19.31807100 | 0.14434700  |
| 6 | 2.08142700   | -5.39263600  | -1.74809800 | 1 | -9.40982400  | -22.18775900 | 0.87316400  |

1 -6.96992500 -22.10017700 0.69953600  
1 -15.05459800 -17.60998600 0.87636800  
1 -13.83092200 -19.72801600 0.97552100  
1 13.07872800 8.40587800 0.09269600  
1 11.71259600 6.41222200 -0.05866600  
1 10.49742500 4.90837600 -0.50844700  
1 9.05537000 3.04023900 -0.88831000  
1 7.83306400 1.63973100 -1.41318500  
1 6.40473700 -0.23470500 -1.78995700  
1 5.22405300 -1.67882600 -2.19622300  
1 3.93249700 -3.67695800 -2.34362500  
1 2.98748500 -5.31890000 -2.34516900  
1 1.91838400 -7.44380400 -2.18795600  
1 1.27091300 -9.19166400 -1.77790100  
1 0.37915700 -11.37179300 -1.39229000  
1 -0.20894300 -13.13354800 -0.86685500  
1 -1.08704000 -15.32245900 -0.47689000  
1 -13.77537700 -10.53653000 0.25735100  
1 -15.00951500 -12.60310900 0.49107000  
1 -11.52443300 -6.85042800 -0.12520100  
1 -12.75946800 -8.87573900 0.12850200  
1 -9.31644200 -3.18438600 -0.48054000  
1 -10.53511800 -5.22115900 -0.26867500  
1 -7.16199000 0.49896700 -0.68048700  
1 -8.35615100 -1.55804000 -0.58269500  
1 -5.05522800 4.21083900 -0.63740800  
1 -6.22441900 2.13819900 -0.69921700  
1 -2.99949700 7.94931300 -0.39177300  
1 -4.13897600 5.86506400 -0.57248500  
1 -0.97192700 11.72292000 -0.04484100  
1 -2.09392700 9.63044200 -0.27488200

6 -11.77264200 -21.45928400 3.43364300  
6 -10.71465600 -22.33763600 3.72086500  
6 -9.39445800 -22.05987900 3.32852000  
6 -12.31747000 -18.32163800 1.44729600  
6 -13.22577000 -17.28486600 1.26002300  
6 -14.46765000 -17.33737500 1.94732700  
6 -14.77897700 -18.48302500 2.70647700  
6 -13.84827700 -19.51149900 2.89853100  
6 -12.56407800 -19.37915600 2.30554600  
6 8.27943300 4.87346400 0.72757400  
6 7.90521300 6.12773200 1.23590100  
6 6.52210600 6.46626600 1.26273800  
6 5.56089900 5.59900000 0.82953200  
6 5.90038600 4.33495200 0.26999100  
6 7.27069400 3.99771100 0.17391500  
6 5.26864600 2.22984200 -0.86314500  
6 4.88558400 3.40520200 -0.18975100  
6 3.49151200 3.61105600 0.05356300  
6 2.55758600 2.66792700 -0.27190800  
6 2.91485100 1.46299900 -0.95086000  
6 4.26462600 1.29767500 -1.32538900  
6 2.33428700 -0.67283400 -2.05503800  
6 1.95455300 0.41501300 -1.24418000  
6 0.64321900 0.39255600 -0.67544300  
6 -0.19307100 -0.67677900 -0.83625500  
6 0.16821100 -1.80149000 -1.64097900  
6 1.40470000 -1.74759200 -2.31653400  
6 -0.25834800 -4.04688200 -2.59544100  
6 -0.65751700 -2.99175600 -1.74938600  
6 -1.84377800 -3.17869700 -0.97417500  
6 -2.53411200 -4.35771900 -0.98435300  
6 -2.11282900 -5.47254000 -1.77357400  
6 -0.99230800 -5.29247300 -2.61052300  
6 -2.19600100 -7.86803900 -2.38950500  
6 -2.74907200 -6.77584200 -1.68974800  
6 -3.90322000 -7.02510000 -0.88426600  
6 -4.42761100 -8.27972600 -0.74489500  
6 -3.81253700 -9.42370200 -1.34186000  
6 -2.68308300 -9.20830100 -2.15632300  
6 -3.46355000 -11.86949500 -1.48276200  
6 -4.25871900 -10.77860000 -1.07387500  
6 -5.47652600 -11.06684200 -0.38511600  
6 -5.84289300 -12.34809200 -0.08237800  
6 -4.98992300 -13.46108000 -0.36265400  
6 -3.78624200 -13.21034100 -1.04822500  
6 -4.34572400 -15.84135400 -0.06085100  
6 -5.30332800 -14.80910100 0.07338100  
6 -6.56328500 -15.13716200 0.64869900  
6 -6.84688600 -16.40641700 1.06367900  
6 -5.88001500 -17.45024400 1.00022400  
6 -4.61203300 -17.15910900 0.47181600  
6 -11.14121100 -14.94797200 -0.78054900  
6 -11.79682700 -13.70389800 -0.56437100  
6 -13.06720900 -13.70739400 0.05688800  
6 -13.60680600 -14.94053300 0.59061000  
6 -12.83884100 -16.10974700 0.50408900  
6 -11.64286900 -16.10250100 -0.26620600  
6 -9.20241800 -11.25703000 -1.74215800  
6 -9.85853200 -10.00027800 -1.58453400  
6 -11.18752900 -9.99643600 -1.10958100  
6 -11.84526400 -11.24104000 -0.77031000  
6 -11.16604400 -12.46088800 -0.94566000  
6 -9.82855200 -12.42894200 -1.44518000  
6 -7.19102600 -7.53866100 -2.58932800  
6 -7.82283200 -6.27871100 -2.36442900  
6 -9.16390300 -6.28078900 -1.92770800  
6 -9.85205900 -7.52951600 -1.68599600  
6 -9.18313900 -8.75434000 -1.87874000

29. [42]clarene

<2,2,16,2,2,18>

E(wB97XD/cc-pVDZ) = -6451.29150598  
No imaginary frequency (B3LYP/6-31G\*)

6 6.33412500 12.93720800 2.35429700  
6 5.81499900 14.14112400 2.90154200  
6 4.47312600 14.45850000 2.65752400  
6 3.64300000 13.61737600 1.89000400  
6 4.21528600 12.48730300 1.24738400  
6 5.55351100 12.19270100 1.48694200  
6 10.17720900 11.47657400 3.52710700  
6 9.77305100 12.77555300 3.87846000  
6 8.50254600 13.27186500 3.54239800  
6 7.64580200 12.45605900 2.76326300  
6 8.03415500 11.15838600 2.46423200  
6 9.25335200 10.63229200 2.85780100  
6 11.23524300 7.47902200 2.40191500  
6 10.90968000 8.78046900 2.79225800  
6 9.58312300 9.24017100 2.57181700  
6 8.62408600 8.35380100 2.09457600  
6 8.92599500 7.04039700 1.73434500  
6 10.27910700 6.61259300 1.84307600  
6 -5.13850100 -19.77014400 1.55451900  
6 -6.17150000 -18.79348900 1.48426600  
6 -7.45707800 -19.17208200 1.87164400  
6 -7.75457200 -20.44630800 2.34179400  
6 -6.70401600 -21.38642700 2.52140200  
6 -5.41860500 -21.03454600 2.10206500  
6 -9.12317800 -20.83470900 2.66544400  
6 -10.18475100 -20.01550200 2.31881600  
6 -11.49769700 -20.30440300 2.66073600

|   |              |              |             |   |              |              |             |
|---|--------------|--------------|-------------|---|--------------|--------------|-------------|
| 6 | -7.83638000  | -8.71662200  | -2.35417100 | 6 | -3.56939000  | -1.22980100  | -3.06066200 |
| 6 | -5.07996300  | -3.78885200  | -3.06370300 | 6 | -3.47823300  | 1.15636300   | -2.55728000 |
| 6 | -7.77401700  | -3.80692500  | -2.27416400 | 6 | -4.86353900  | 1.14182300   | -2.29779100 |
| 6 | -7.11896300  | -5.02514800  | -2.54495700 | 6 | -4.78885800  | 3.51797800   | -1.77266200 |
| 6 | -5.75669100  | -4.97020800  | -2.97143500 | 6 | -5.49497700  | 2.36534500   | -1.92373200 |
| 6 | -5.69477800  | -2.54238800  | -2.73602600 | 1 | 4.04468100   | 15.35666700  | 3.11027500  |
| 6 | -7.05643800  | -2.55622400  | -2.37079900 | 1 | 5.97806900   | 11.30723000  | 1.02932200  |
| 6 | -0.59567200  | 3.56985100   | -2.34541200 | 1 | 10.46286500  | 13.41224100  | 4.43900500  |
| 6 | -1.22225300  | 4.77498700   | -1.90226700 | 1 | 7.34930100   | 10.52167600  | 1.91773700  |
| 6 | -2.62162600  | 4.77245700   | -1.73908000 | 1 | 12.26090500  | 7.12224800   | 2.52801000  |
| 6 | -3.37737800  | 3.56180100   | -1.97192300 | 1 | 7.59913800   | 8.69511900   | 1.99298200  |
| 6 | -2.72387100  | 2.38085800   | -2.38096100 | 1 | -8.25518800  | -18.44053200 | 1.80024800  |
| 6 | -1.31137600  | 2.43299700   | -2.57976500 | 1 | -4.60624900  | -21.75987800 | 2.19765500  |
| 6 | 1.67509000   | 7.11916700   | -1.43422800 | 1 | -9.97570100  | -19.10077900 | 1.77782600  |
| 6 | 1.04589000   | 8.31607900   | -0.97493900 | 1 | -10.92060800 | -23.25644000 | 4.27655600  |
| 6 | -0.35476400  | 8.32722800   | -0.83973300 | 1 | -11.35426600 | -18.26042200 | 0.95511500  |
| 6 | -1.11923300  | 7.14422600   | -1.17540500 | 1 | -15.75526400 | -18.54667300 | 3.19441500  |
| 6 | -0.46358300  | 5.97287400   | -1.61118200 | 1 | 6.20047000   | 7.42423400   | 1.66858300  |
| 6 | 0.95757100   | 6.00073000   | -1.73093100 | 1 | 4.51794200   | 5.90498300   | 0.90086500  |
| 6 | 3.98801200   | 10.49881700  | -0.24555900 | 1 | 3.15088700   | 4.51730600   | 0.55269600  |
| 6 | 3.39556600   | 11.56705300  | 0.48357400  | 1 | 1.51410100   | 2.86285600   | -0.02313900 |
| 6 | 1.99918900   | 11.68030000  | 0.52197700  | 1 | 0.30497400   | 1.22331000   | -0.05737500 |
| 6 | 1.19440000   | 10.60264200  | -0.01414200 | 1 | -1.16437300  | -0.65128500  | -0.34360900 |
| 6 | 1.82080800   | 9.47457300   | -0.59292100 | 1 | -2.20674600  | -2.37474200  | -0.33557800 |
| 6 | 3.23311100   | 9.49363800   | -0.76431300 | 1 | -3.41774500  | -4.44250600  | -0.35358800 |
| 6 | 2.22003200   | 13.79210800  | 1.76345000  | 1 | -4.39604400  | -6.20011900  | -0.37125600 |
| 6 | 1.44273600   | 12.85699200  | 1.14884100  | 1 | -5.31351900  | -8.40141200  | -0.12294700 |
| 6 | 7.98690200   | 14.55796400  | 3.97659800  | 1 | -6.14987200  | -10.25543500 | -0.10790200 |
| 6 | 6.71447500   | 14.94958300  | 3.70577400  | 1 | -6.79324200  | -12.50133700 | 0.42734500  |
| 6 | 11.85062900  | 9.68747500   | 3.42363700  | 1 | -7.33567400  | -14.37568100 | 0.74879400  |
| 6 | 11.49751600  | 10.94212800  | 3.80119000  | 1 | -7.83308400  | -16.59768400 | 1.48392100  |
| 6 | -3.60190300  | -18.18883300 | 0.51436700  | 1 | -10.22262900 | -14.99426400 | -1.36188600 |
| 6 | -3.83996200  | -19.41308400 | 1.05418800  | 1 | -11.11111000 | -17.03205600 | -0.46224100 |
| 6 | -8.28071300  | -22.96070800 | 3.55627400  | 1 | -8.17323900  | -11.29957900 | -2.09448400 |
| 6 | -7.02362900  | -22.65732400 | 3.14523300  | 1 | -9.26769900  | -13.35274000 | -1.57332000 |
| 6 | -14.09586000 | -20.70187400 | 3.69295500  | 1 | -6.16236500  | -7.57866400  | -2.94246400 |
| 6 | -13.13175300 | -21.63310000 | 3.91432900  | 1 | -7.29188300  | -9.64195900  | -2.53627000 |
| 6 | 10.60917300  | 5.29809400   | 1.36634200  | 1 | -4.03980500  | -3.81705300  | -3.38326400 |
| 6 | 9.66835300   | 4.49044100   | 0.81001200  | 1 | -5.22395000  | -5.88612100  | -3.22155100 |
| 6 | 7.61433000   | 2.78289900   | -0.49419800 | 1 | 0.48122200   | 3.53654800   | -2.50401100 |
| 6 | 6.66363800   | 1.96084900   | -1.01791000 | 1 | -0.77287200  | 1.54608300   | -2.90824800 |
| 6 | 4.60691200   | 0.18840900   | -2.15442000 | 1 | 2.75797200   | 7.06985500   | -1.53070200 |
| 6 | 3.67739300   | -0.72861100  | -2.53587700 | 1 | 1.49986000   | 5.11273600   | -2.05120200 |
| 6 | 1.72713800   | -2.79474800  | -3.22961000 | 1 | 5.06449200   | 10.47507300  | -0.40645400 |
| 6 | 0.92467600   | -3.88142600  | -3.37702700 | 1 | 3.73363900   | 8.69867400   | -1.31325400 |
| 6 | -0.56177400  | -6.38979900  | -3.41557600 | 1 | 1.75509400   | 14.66978400  | 2.21765300  |
| 6 | -1.12434800  | -7.62111500  | -3.29785700 | 1 | 0.36423800   | 13.01261800  | 1.13061300  |
| 6 | -1.98708100  | -10.34404200 | -2.67012700 | 1 | 8.63736800   | 15.20167800  | 4.57316400  |
| 6 | -2.33567100  | -11.61058300 | -2.31696300 | 1 | 6.34605400   | 15.90265600  | 4.09210100  |
| 6 | -2.87800900  | -14.29642700 | -1.24284300 | 1 | 12.86341800  | 9.32569400   | 3.61496800  |
| 6 | -3.12828800  | -15.53817800 | -0.74356200 | 1 | 12.22443300  | 11.58605000  | 4.30138900  |
| 6 | -14.88287700 | -15.02928600 | 1.26212400  | 1 | -2.60145500  | -17.97429100 | 0.14137100  |
| 6 | -15.30767200 | -16.17109800 | 1.87227000  | 1 | -3.03844200  | -20.15333500 | 1.10147200  |
| 6 | -13.16434000 | -11.28530100 | -0.21939600 | 1 | -8.47775100  | -23.91494000 | 4.05009200  |
| 6 | -13.74056600 | -12.45416900 | 0.18431100  | 1 | -6.21161700  | -23.37070100 | 3.30323300  |
| 6 | -11.20518900 | -7.56493400  | -1.23220300 | 1 | -15.09403100 | -20.84339500 | 4.11362500  |
| 6 | -11.84079800 | -8.73759800  | -0.95820400 | 1 | -13.36181100 | -22.52224300 | 4.50583600  |
| 6 | -9.14327900  | -3.84868600  | -1.87540100 | 1 | 11.64369500  | 4.95695400   | 1.44389300  |
| 6 | -9.80540900  | -5.02548600  | -1.71182500 | 1 | 9.97562100   | 3.50788900   | 0.45466300  |
| 6 | -7.00084300  | -0.14161100  | -2.07874000 | 1 | 8.66051800   | 2.50716300   | -0.61653400 |
| 6 | -7.68987400  | -1.31375100  | -2.07159700 | 1 | 6.98932000   | 1.05315200   | -1.52283900 |
| 6 | -2.54033400  | 7.11191300   | -1.05794000 | 1 | 5.62703300   | 0.07377100   | -2.51659800 |
| 6 | -3.25397700  | 5.98328900   | -1.32432600 | 1 | 3.99611000   | -1.54960400  | -3.17480500 |
| 6 | -0.23134200  | 10.59224900  | 0.07081600  | 1 | 2.62807400   | -2.73135500  | -3.83674100 |
| 6 | -0.96652900  | 9.51577600   | -0.33135600 | 1 | 1.22359500   | -4.64539200  | -4.09092200 |
| 6 | -2.86357700  | -0.06543600  | -2.96977700 | 1 | 0.25107100   | -6.26391900  | -4.12705600 |
| 6 | -5.60804900  | -0.09388800  | -2.38269800 | 1 | -0.74313200  | -8.42526500  | -3.92411100 |
| 6 | -4.95914700  | -1.29373500  | -2.73871700 | 1 | -1.12021000  | -10.20966100 | -3.31372600 |

1 -1.74418900 -12.43788400 -2.70504900  
 1 -1.93465800 -14.13014700 -1.75990700  
 1 -2.38255300 -16.31665300 -0.89635400  
 1 -15.53680800 -14.15770700 1.28343500  
 1 -16.28358000 -16.19304100 2.36211600  
 1 -13.72817400 -10.36371000 -0.08520000  
 1 -14.73431200 -12.41516500 0.62902300  
 1 -11.75866300 -6.63877600 -1.09176200  
 1 -12.87257500 -8.69610900 -0.61379900  
 1 -9.68619100 -2.92584200 -1.68334900  
 1 -10.84629600 -4.98888100 -1.39739600  
 1 -7.53956300 0.77000900 -1.82987100  
 1 -8.74725300 -1.28408100 -1.81814400  
 1 -3.08266300 8.00241200 -0.74532700  
 1 -4.33532100 6.02367100 -1.21081100  
 1 -0.75639700 11.45370800 0.48196400  
 1 -2.04915700 9.56912700 -0.22996200  
 1 -1.80270400 -0.08959300 -3.21323700  
 1 -3.03909200 -2.12817700 -3.37136600  
 1 -5.32903700 4.41546000 -1.47883100  
 1 -6.56736900 2.39593900 -1.74412800

6 7.33684000 -7.55974800 -0.00228400  
 6 5.91079600 -7.58636900 -0.00200600  
 6 5.21683800 -8.75662900 -0.00239900  
 6 5.87724900 -10.02076300 -0.00310000  
 6 7.28613800 -10.03620800 -0.00329000  
 6 5.80495200 -12.50178500 -0.00421900  
 6 5.13056900 -11.26117800 -0.00360300  
 6 3.70738000 -11.26925100 -0.00352000  
 6 3.00075100 -12.43410800 -0.00403000  
 6 3.64593600 -13.70136400 -0.00466600  
 6 5.05266100 -13.73767400 -0.00474600  
 6 -13.68927000 6.19698600 0.00017700  
 6 -14.33620800 7.42849800 0.00034000  
 6 -15.76253200 7.44846000 0.00040200  
 6 -16.45845400 6.24193300 0.00021300  
 6 -15.79786300 5.00502300 -0.00001200  
 6 -14.37660600 4.97562400 -0.00000600  
 6 -11.49821200 9.96348500 0.00038600  
 6 -12.23473700 11.17935400 0.00085500  
 6 -13.63622500 11.13245100 0.00103700  
 6 -14.33265000 9.92616700 0.00082900  
 6 -13.60174400 8.70120300 0.00046600  
 6 -12.21179100 8.75722700 0.00022300  
 6 -0.73468100 -16.13095000 -0.00576400  
 6 -1.47782800 -14.95501200 -0.00522200  
 6 -2.87924400 -14.93996100 -0.00523100  
 6 -3.56429500 -16.18559400 -0.00582800  
 6 -2.82322800 -17.37601000 -0.00636700  
 6 -1.43038300 -17.37627200 -0.00634700  
 6 -11.61147000 2.42308000 -0.00031900  
 6 -12.26705400 3.61744200 -0.00016000  
 6 -13.68710100 3.69237900 -0.00019200  
 6 -14.42171400 2.49220100 -0.00041200  
 6 -13.72748100 1.22273800 -0.00061100  
 6 -12.31585500 1.18642100 -0.00054600  
 6 -9.52358700 -1.32708000 -0.00074200  
 6 -10.19001300 -0.14088900 -0.00056400  
 6 -11.61498300 -0.08051000 -0.00072800  
 6 -12.33280000 -1.29282000 -0.00106000  
 6 -11.62342800 -2.55696600 -0.00132300  
 6 -10.21363300 -2.57537300 -0.00114900  
 6 -7.39212700 -5.05462900 -0.00142500  
 6 -8.07216600 -3.87644600 -0.00117100  
 6 -9.49807700 -3.83271400 -0.00140100  
 6 -10.20202500 -5.05399800 -0.00188800  
 6 -9.47724100 -6.30982900 -0.00220000  
 6 -8.06756300 -6.31120200 -0.00196000  
 6 -5.21683800 -8.75662900 -0.00239900  
 6 -5.91079600 -7.58636900 -0.00200600  
 6 -7.33684000 -7.55974800 -0.00228400  
 6 -8.02604700 -8.78968200 -0.00289200  
 6 -7.28613800 -10.03620800 -0.00329000  
 6 -5.87724900 -10.02076300 -0.00310000  
 6 -3.00075100 -12.43410800 -0.00403000  
 6 -3.70738000 -11.26925100 -0.00352000  
 6 -5.13056900 -11.26117800 -0.00360300  
 6 -5.80495200 -12.50178500 -0.00421900  
 6 -5.05266100 -13.73767400 -0.00474600  
 6 -3.64593600 -13.70136400 -0.00466600  
 6 10.04216100 10.00845400 0.00012100  
 6 9.37047300 11.24504700 0.00048200  
 6 7.92395500 11.27902400 0.00032800  
 6 7.18631500 10.07493700 -0.00028500  
 6 7.90471200 8.84637900 -0.00073100  
 6 9.26681100 8.81641500 -0.00051800  
 6 5.73869400 10.10169800 -0.00042800  
 6 5.04794800 11.32977000 0.00082000  
 6 3.59844100 11.34782500 -0.00000900

### 30. [42]clarene

<2,12,2,12,2,12>

E(wB97XD/cc-pVDZ) = -6451.28526716  
 No imaginary frequency (B3LYP/6-31G\*)

6 16.45845400 6.24193300 0.00021100  
 6 15.76253200 7.44846000 0.00040100  
 6 14.33620800 7.42849800 0.00033900  
 6 13.68927000 6.19698600 0.00017600  
 6 14.37660600 4.97562400 -0.00000700  
 6 15.79786300 5.00502300 -0.00001300  
 6 14.33265000 9.92616800 0.00082700  
 6 13.63622500 11.13245100 0.00103500  
 6 12.23473700 11.17935400 0.00085400  
 6 11.49821200 9.96348500 0.00038500  
 6 12.21179100 8.75722700 0.00022200  
 6 13.60174400 8.70120300 0.00046500  
 6 3.56429500 -16.18559400 -0.00582800  
 6 2.87924400 -14.93996100 -0.00523100  
 6 1.47782800 -14.95501200 -0.00522200  
 6 0.73468100 -16.13095000 -0.00576400  
 6 1.43038400 -17.37627200 -0.00634700  
 6 2.82322800 -17.37601000 -0.00636700  
 6 14.42171400 2.49220100 -0.00041300  
 6 13.68710100 3.69237900 -0.00019300  
 6 12.26705400 3.61744200 -0.00016100  
 6 11.61147000 2.42308000 -0.00031900  
 6 12.31585500 1.18642100 -0.00054700  
 6 13.72748100 1.22273800 -0.00061100  
 6 12.33280000 -1.29282000 -0.00106100  
 6 11.61498300 -0.08051000 -0.00072900  
 6 10.19001300 -0.14088900 -0.00056400  
 6 9.52358700 -1.32708000 -0.00074200  
 6 10.21363300 -2.57537300 -0.00114900  
 6 11.62342800 -2.55696600 -0.00132400  
 6 10.20202500 -5.05399800 -0.00188800  
 6 9.49807700 -3.83271400 -0.00140100  
 6 8.07216600 -3.87644600 -0.00117000  
 6 7.39212700 -5.05462900 -0.00142400  
 6 8.06756300 -6.31120200 -0.00196000  
 6 9.47724100 -6.30982800 -0.00220000  
 6 8.02604700 -8.78968200 -0.00289200

|   |              |              |             |   |              |              |             |
|---|--------------|--------------|-------------|---|--------------|--------------|-------------|
| 6 | 2.87744500   | 10.13622400  | -0.00057400 | 1 | 3.35594200   | -18.33052000 | -0.00681700 |
| 6 | 3.61316700   | 8.91438400   | -0.00113300 | 1 | 11.67134100  | 4.52821600   | -0.00000700 |
| 6 | 4.97362400   | 8.89800800   | -0.00106900 | 1 | 10.52382100  | 2.43647600   | -0.00028900 |
| 6 | 1.43081400   | 10.14508600  | -0.00058200 | 1 | 9.60285200   | 0.77485800   | -0.00026900 |
| 6 | 0.72499200   | 11.36533700  | -0.00009100 | 1 | 8.43609400   | -1.30188800  | -0.00058200 |
| 6 | -0.72499200  | 11.36533700  | -0.00009100 | 1 | 7.49575500   | -2.95392600  | -0.00077600 |
| 6 | -1.43081400  | 10.14508600  | -0.00058200 | 1 | 6.30498100   | -5.01701400  | -0.00122400 |
| 6 | -0.68017800  | 8.93197000   | -0.00104800 | 1 | 5.34533100   | -6.65708900  | -0.00145500 |
| 6 | 0.68017800   | 8.93197000   | -0.00104800 | 1 | 4.13019800   | -8.70619900  | -0.00213900 |
| 6 | -2.87744500  | 10.13622400  | -0.00057300 | 1 | 3.15245800   | -10.33366200 | -0.00306300 |
| 6 | -3.59844100  | 11.34782500  | -0.00000900 | 1 | 1.91411300   | -12.37391000 | -0.00393600 |
| 6 | -5.04794800  | 11.32977000  | 0.00008300  | 1 | -12.60382700 | 6.18160300   | 0.00021600  |
| 6 | -5.73869400  | 10.10169800  | -0.00042800 | 1 | -17.55144900 | 6.25767700   | 0.00024300  |
| 6 | -4.97362400  | 8.89800800   | -0.00106800 | 1 | -14.19674800 | 12.07089400  | 0.00135000  |
| 6 | -3.61316700  | 8.91438400   | -0.00113300 | 1 | -11.65525000 | 7.82521200   | -0.00010700 |
| 6 | -7.18631500  | 10.07493600  | -0.00028500 | 1 | -0.94854200  | -14.00714300 | -0.00478200 |
| 6 | -7.92395500  | 11.27902400  | 0.00032900  | 1 | -3.35594200  | -18.33052000 | -0.00681600 |
| 6 | -9.37047300  | 11.24504700  | 0.00048300  | 1 | -10.52382100 | 2.43647600   | -0.00028900 |
| 6 | -10.04216100 | 10.00845400  | 0.00012200  | 1 | -11.67134100 | 4.52821500   | -0.00000700 |
| 6 | -9.26681100  | 8.81641500   | -0.00051700 | 1 | -8.43609400  | -1.30188800  | -0.00058200 |
| 6 | -7.90471100  | 8.84637900   | -0.00073100 | 1 | -9.60285200  | 0.77485800   | -0.00026900 |
| 6 | 16.51319800  | 3.76112000   | -0.00023500 | 1 | -6.30498100  | -5.01701400  | -0.00122500 |
| 6 | 15.86028400  | 2.57093300   | -0.00043100 | 1 | -7.49575500  | -2.95392600  | -0.00077700 |
| 6 | 16.45560600  | 8.72020900   | 0.00070100  | 1 | -4.13019800  | -8.70619900  | -0.00213900 |
| 6 | 15.78052400  | 9.88996000   | 0.00094000  | 1 | -5.34533100  | -6.65708900  | -0.00145600 |
| 6 | -0.67529800  | -18.61217500 | -0.00691400 | 1 | -1.91411300  | -12.37391000 | -0.00393600 |
| 6 | 0.67529800   | -18.61217500 | -0.00691400 | 1 | -3.15245800  | -10.33366200 | -0.00306300 |
| 6 | 14.42111600  | -0.02739600  | -0.00088100 | 1 | 7.37199600   | 7.89801800   | -0.00124500 |
| 6 | 13.75989500  | -1.21956600  | -0.00111200 | 1 | 9.75708300   | 7.84484400   | -0.00088800 |
| 6 | 12.30381800  | -3.81257200  | -0.00178800 | 1 | 3.09067700   | 7.96029100   | -0.00164600 |
| 6 | 11.62899500  | -4.99795300  | -0.00206800 | 1 | 5.47244000   | 7.93133300   | -0.00152900 |
| 6 | 10.14251000  | -7.57351400  | -0.00278200 | 1 | -1.19115800  | 7.97164800   | -0.00138400 |
| 6 | 9.45361100   | -8.75077900  | -0.00312100 | 1 | 1.19115800   | 7.97164800   | -0.00138400 |
| 6 | 7.93627800   | -11.30874900 | -0.00388600 | 1 | -5.47244000  | 7.93133300   | -0.00152800 |
| 6 | 7.23439900   | -12.47744500 | -0.00431200 | 1 | -3.09067700  | 7.96029100   | -0.00164500 |
| 6 | 5.70365600   | -15.02292000 | -0.00536700 | 1 | -9.75708300  | 7.84484400   | -0.00088800 |
| 6 | 4.99922100   | -16.18334700 | -0.00587100 | 1 | -7.37199500  | 7.89801800   | -0.00124500 |
| 6 | -15.78052400 | 9.88995900   | 0.00094200  | 1 | 17.60490200  | 3.78669900   | -0.00025200 |
| 6 | -16.45560600 | 8.72020900   | 0.00070200  | 1 | 16.45067900  | 1.65629500   | -0.00060300 |
| 6 | -10.15838300 | 12.45121900  | 0.00098300  | 1 | 17.54768800  | 8.71115500   | 0.00075300  |
| 6 | -11.51556800 | 12.42105300  | 0.00113000  | 1 | 16.31911000  | 10.84003500  | 0.00119900  |
| 6 | -5.70365600  | -15.02292000 | -0.00536600 | 1 | -1.22900000  | -19.55351900 | -0.00734500 |
| 6 | -4.99922100  | -16.18334700 | -0.00587100 | 1 | 1.22900000   | -19.55351800 | -0.00734500 |
| 6 | -16.51319800 | 3.76112000   | -0.00023300 | 1 | 15.50955400  | -0.04590100  | -0.00091900 |
| 6 | -15.86028400 | 2.57093300   | -0.00043000 | 1 | 14.35134000  | -2.13367600  | -0.00131200 |
| 6 | -14.42111600 | -0.02739600  | -0.00088000 | 1 | 13.39221400  | -3.84167600  | -0.00196500 |
| 6 | -13.75989500 | -1.21956600  | -0.00111100 | 1 | 12.20989200  | -5.91879200  | -0.00243500 |
| 6 | -12.30381800 | -3.81257200  | -0.00178800 | 1 | 11.23047900  | -7.61568800  | -0.00300000 |
| 6 | -11.62899500 | -4.99795300  | -0.00206700 | 1 | 10.02332200  | -9.67859900  | -0.00358900 |
| 6 | -10.14251000 | -7.57351400  | -0.00278200 | 1 | 9.02366700   | -11.36379300 | -0.00399900 |
| 6 | -9.45361100  | -8.75077900  | -0.00312000 | 1 | 7.79455400   | -13.41085500 | -0.00473600 |
| 6 | -7.93627800  | -11.30874900 | -0.00388600 | 1 | 6.79097900   | -15.07681200 | -0.00543500 |
| 6 | -7.23439900  | -12.47744500 | -0.00431100 | 1 | 5.52282400   | -17.14163600 | -0.00632600 |
| 6 | 11.51556800  | 12.42105300  | 0.00112900  | 1 | -16.31911000 | 10.84003500  | 0.00120100  |
| 6 | 10.15838300  | 12.45122000  | 0.00098200  | 1 | -17.54768800 | 8.71115500   | 0.00075500  |
| 6 | 7.18840600   | 12.50496300  | 0.00081900  | 1 | -9.66173000  | 13.41998300  | 0.00121900  |
| 6 | 5.82533800   | 12.52879500  | 0.00071000  | 1 | -12.08389800 | 13.35350500  | 0.00148000  |
| 6 | 2.85113000   | 12.56479400  | 0.00046100  | 1 | -6.79097900  | -15.07681200 | -0.00543500 |
| 6 | 1.48711100   | 12.57305100  | 0.00041100  | 1 | -5.52282400  | -17.14163600 | -0.00632500 |
| 6 | -1.48711100  | 12.57305000  | 0.00041100  | 1 | -17.60490200 | 3.78669900   | -0.00025000 |
| 6 | -2.85113000  | 12.56479400  | 0.00046100  | 1 | -16.45067900 | 1.65629500   | -0.00060100 |
| 6 | -5.82533800  | 12.52879500  | 0.00071000  | 1 | -15.50955400 | -0.04590100  | -0.00091700 |
| 6 | -7.18840600  | 12.50496300  | 0.00081900  | 1 | -14.35134000 | -2.13367600  | -0.00131100 |
| 1 | 17.55144900  | 6.25767700   | 0.00024100  | 1 | -13.39221400 | -3.84167700  | -0.00196400 |
| 1 | 12.60382700  | 6.18160300   | 0.00021500  | 1 | -12.20989200 | -5.91879200  | -0.00243400 |
| 1 | 14.19674800  | 12.07089400  | 0.00134800  | 1 | -11.23047900 | -7.61568800  | -0.00299900 |
| 1 | 11.65525000  | 7.82521200   | -0.00010800 | 1 | -10.02332200 | -9.67859900  | -0.00358900 |
| 1 | 0.94854200   | -14.00714300 | -0.00478200 | 1 | -9.02366700  | -11.36379300 | -0.00399900 |

1 -7.79455400 -13.41085500 -0.00473600  
 1 12.08389800 13.35350500 0.00147900  
 1 9.66173000 13.41998300 0.00121800  
 1 7.71671400 13.45675200 0.00133600  
 1 5.32967200 13.49821000 0.00114000  
 1 3.36968900 13.52211700 0.00086200  
 1 0.98014600 13.53658300 0.00077400  
 1 -0.98014600 13.53658300 0.00077400  
 1 -3.36968900 13.52211700 0.00086200  
 1 -5.32967200 13.49821000 0.00114000  
 1 -7.71671400 13.45675100 0.00133600

6 7.80603900 6.73107400 -0.39154500  
 6 5.82978700 4.70744500 -0.82223700  
 6 5.64195600 5.67173100 0.18752600  
 6 4.50383100 5.53460500 1.04027200  
 6 3.64952100 4.47735700 0.93287000  
 6 3.81740900 3.47377200 -0.06872400  
 6 4.87872800 3.62990000 -0.98401300  
 6 3.15235900 1.36287300 -1.17731800  
 6 2.95403900 2.31215100 -0.15424200  
 6 1.91102800 2.06464400 0.78890000  
 6 1.17538900 0.91632700 0.76306600  
 6 1.39899700 -0.09954300 -0.21475800  
 6 2.36224100 0.15275900 -1.21296900  
 6 0.97845000 -2.34494800 -1.16785600  
 6 0.69529600 -1.36695300 -0.19286300  
 6 -0.27801200 -1.68375600 0.80192700  
 6 -0.87361600 -2.90935400 0.86109400  
 6 -0.54312800 -3.95171300 -0.05707300  
 6 0.36870600 -3.65308900 -1.08965200  
 6 -0.66187800 -6.30219200 -0.82235400  
 6 -1.08681200 -5.28998000 0.06207700  
 6 -2.04279100 -5.63735500 1.06351400  
 6 -2.51269800 -6.91049100 1.19525900  
 6 -2.03439100 -7.97632300 0.37292300  
 6 -1.09348100 -7.66807400 -0.62877000  
 6 -1.82257400 -10.39005900 -0.14160200  
 6 -2.44876800 -9.34869200 0.57466100  
 6 -3.48469900 -9.69257200 1.49294000  
 6 -3.85287900 -10.98833900 1.69843300  
 6 -3.19238400 -12.07140200 1.04224600  
 6 -2.15948200 -11.76986700 0.13458600  
 6 -2.89616700 -14.50009700 0.61627600  
 6 -3.57927000 -13.44690600 1.26747200  
 6 -4.67394500 -13.77209800 2.11726300  
 6 -5.14717800 -15.04649000 2.19577300  
 6 -4.54241200 -16.10709700 1.46633300  
 6 -3.35356900 -15.86399000 0.76525300  
 6 -8.42399600 -11.36762600 0.57147800  
 6 -9.05958500 -10.11826200 0.32131400  
 6 -10.47257500 -10.07564600 0.37486200  
 6 -11.23601000 -11.27662200 0.63053600  
 6 -10.57026500 -12.49595200 0.84074100  
 6 -9.14590400 -12.49916900 0.82292900  
 6 -6.17386400 -7.79941600 -0.44150300  
 6 -6.82610200 -6.55670200 -0.71036900  
 6 -8.23139900 -6.51679900 -0.58730600  
 6 -8.97382900 -7.70835800 -0.23866000  
 6 -8.30036300 -8.92179400 0.00219700  
 6 -6.87395500 -8.92116100 -0.09806400  
 6 -4.00408500 -4.20659100 -1.60222500  
 6 -4.66951400 -2.95229300 -1.75525600  
 6 -6.07153900 -2.93442200 -1.60754100  
 6 -6.78942800 -4.14698000 -1.28389500  
 6 -6.09586000 -5.35943000 -1.08815900  
 6 -4.67946600 -5.34889200 -1.27796500  
 6 -1.86302100 -0.49620700 -2.33366500  
 6 -2.53814700 0.76156500 -2.32896000  
 6 -3.94520300 0.75003300 -2.24805000  
 6 -4.65743600 -0.49928200 -2.09943800  
 6 -3.95261700 -1.71804300 -2.01929400  
 6 -2.53410700 -1.67487300 -2.17978400  
 6 0.26748500 3.27721200 -2.28285900  
 6 -0.42413500 4.51693200 -2.12931000  
 6 -1.83228500 4.49513900 -2.18727700  
 6 -2.53820200 3.23784400 -2.29444800  
 6 -1.82447200 2.02374900 -2.35458000  
 6 -0.39900700 2.09187300 -2.39370900  
 6 2.32780000 6.98875700 -1.41004000

### 31. [44]clarene

<2,2,18,2,2,18>

E(wB97XD/cc-pVDZ) = -6758.50833750  
 No imaginary frequency (B3LYP/6-31G\*)

6 8.33495000 18.04392300 1.56633100  
 6 7.63147800 19.27802000 1.50868900  
 6 6.24124200 19.24831100 1.37218200  
 6 5.53551700 18.04031900 1.23433500  
 6 6.24786900 16.80899800 1.25246000  
 6 7.62828800 16.85374900 1.44428600  
 6 12.60503900 17.99490900 1.36352600  
 6 11.91207300 19.21479400 1.41338500  
 6 10.51509300 19.26720100 1.54202400  
 6 9.79334800 18.04942400 1.64377100  
 6 10.50085200 16.85934700 1.71648500  
 6 11.87839400 16.79336900 1.56030100  
 6 14.37691800 14.19658000 0.53249500  
 6 13.86694200 15.43802000 0.92682800  
 6 12.53598100 15.49819900 1.42276300  
 6 11.83840600 14.31811900 1.63590000  
 6 12.31941000 13.08064600 1.21402100  
 6 13.59904500 13.02606600 0.59797800  
 6 -4.50511800 -18.50008200 0.75974100  
 6 -5.17964200 -17.40674000 1.36659300  
 6 -6.52417100 -17.55436800 1.69864400  
 6 -7.23477500 -18.70776200 1.40562400  
 6 -6.53638600 -19.85503300 0.93937200  
 6 -5.17758700 -19.72956700 0.63111300  
 6 -8.69218700 -18.71492300 1.43685000  
 6 -9.39246400 -17.51927800 1.53463000  
 6 -10.77053500 -17.44450400 1.39875900  
 6 -11.50762100 -18.65259500 1.27659300  
 6 -10.80941100 -19.86630000 1.18191900  
 6 -9.40757500 -19.91606000 1.20345600  
 6 -10.72774200 -14.96252000 1.20653700  
 6 -11.34096400 -13.71999400 1.03230300  
 6 -12.76361100 -13.67998800 0.99630000  
 6 -13.49390800 -14.87548500 1.09321400  
 6 -12.86429200 -16.11486200 1.21752700  
 6 -11.44504100 -16.15158400 1.30154800  
 6 11.81549500 10.77007300 0.50596900  
 6 11.46581400 11.90567700 1.25055100  
 6 10.24063500 11.90681500 1.97332900  
 6 9.35318100 10.87796800 1.87251800  
 6 9.59858600 9.77614600 1.00534900  
 6 10.84232700 9.71344600 0.33511800  
 6 8.83112900 7.72094900 -0.13749900  
 6 8.59613500 8.75434800 0.78938500  
 6 7.34886900 8.76409900 1.48527000  
 6 6.41517500 7.78825400 1.30108000  
 6 6.61518600 6.73010600 0.36489800

|   |              |              |             |   |              |              |             |
|---|--------------|--------------|-------------|---|--------------|--------------|-------------|
| 6 | 1.61472200   | 8.21061600   | -1.21362200 | 1 | -4.64175900  | -20.58747500 | 0.21633900  |
| 6 | 0.21984300   | 8.19870000   | -1.41793800 | 1 | -8.83339400  | -16.59821800 | 1.64898600  |
| 6 | -0.45949800  | 6.96365700   | -1.74135100 | 1 | -11.37345600 | -20.79178600 | 1.03813200  |
| 6 | 0.27057100   | 5.76606500   | -1.88571300 | 1 | -9.64375400  | -15.00334700 | 1.22097200  |
| 6 | 1.68894900   | 5.82880400   | -1.73873000 | 1 | -14.58480500 | -14.83265200 | 1.03661200  |
| 6 | 4.28893900   | 10.63423300  | -0.13180000 | 1 | 10.00272300  | 12.73308500  | 2.64194200  |
| 6 | 3.57436000   | 11.86546800  | -0.00766400 | 1 | 8.43654500   | 10.92789800  | 2.45700600  |
| 6 | 2.19330400   | 11.85863500  | -0.28319100 | 1 | 7.12609400   | 9.55331900   | 2.20101900  |
| 6 | 1.53610200   | 10.63017400  | -0.67532500 | 1 | 5.48942000   | 7.84635200   | 1.87131300  |
| 6 | 2.27609000   | 9.43643900   | -0.81073900 | 1 | 4.31619200   | 6.26853600   | 1.82207100  |
| 6 | 3.67330700   | 9.48098100   | -0.52070700 | 1 | 2.81519800   | 4.41691400   | 1.62928100  |
| 6 | 6.24997300   | 14.31121400  | 0.97842800  | 1 | 1.69637800   | 2.79548300   | 1.56649100  |
| 6 | 5.55237300   | 15.55191400  | 1.01141900  | 1 | 0.40565100   | 0.78142500   | 1.52079200  |
| 6 | 4.17041400   | 15.55248000  | 0.76139300  | 1 | -0.56157300  | -0.93769600  | 1.54205500  |
| 6 | 3.50033700   | 14.31022000  | 0.44358400  | 1 | -1.60488700  | -3.08847800  | 1.64717500  |
| 6 | 4.23079900   | 13.10120400  | 0.37219400  | 1 | -2.42824100  | -4.87381900  | 1.73658500  |
| 6 | 5.62197400   | 13.14140300  | 0.66880000  | 1 | -3.24736600  | -7.10914500  | 1.97370800  |
| 6 | 4.11472300   | 17.99166100  | 1.02726700  | 1 | -4.02238100  | -8.91185200  | 2.02857400  |
| 6 | 3.47250700   | 16.81512900  | 0.80325100  | 1 | -4.66613200  | -11.18271500 | 2.39505000  |
| 6 | 9.75745800   | 20.50369300  | 1.52561700  | 1 | -5.16947700  | -12.99950400 | 2.70159000  |
| 6 | 8.40117100   | 20.50765100  | 1.53135300  | 1 | -5.99671700  | -15.24836400 | 2.84698000  |
| 6 | 14.59914700  | 16.68490500  | 0.79955000  | 1 | -7.33742600  | -11.44268700 | 0.55573400  |
| 6 | 14.01404300  | 17.88643500  | 1.03497000  | 1 | -8.59729500  | -13.42356400 | 0.99719600  |
| 6 | -2.66989200  | -16.99783800 | 0.18844400  | 1 | -5.08776100  | -7.87127200  | -0.50374100 |
| 6 | -3.19058700  | -18.25495700 | 0.22889500  | 1 | -6.30860800  | -9.83272000  | 0.09244100  |
| 6 | -8.64269400  | -21.11489800 | 0.91511900  | 1 | -2.92420500  | -4.26863200  | -1.72748000 |
| 6 | -7.29569800  | -21.07817200 | 0.75449700  | 1 | -4.10422200  | -6.26692500  | -1.16417400 |
| 6 | -13.59113400 | -17.36964800 | 1.20920700  | 1 | -0.78041600  | -0.53228100  | -2.44045500 |
| 6 | -12.95289400 | -18.56526700 | 1.21261000  | 1 | -1.95534100  | -2.59690700  | -2.16928100 |
| 6 | 13.99550900  | 11.77991700  | -0.00093500 | 1 | 1.35562500   | 3.25737000   | -2.30152400 |
| 6 | 13.13371700  | 10.72989200  | -0.08212700 | 1 | 0.18707800   | 1.18072100   | -2.49451200 |
| 6 | 11.06456000  | 8.61582100   | -0.55132700 | 1 | 3.41031400   | 6.95985300   | -1.29581400 |
| 6 | 10.10229200  | 7.68047000   | -0.78980400 | 1 | 2.29136100   | 4.93096000   | -1.86461500 |
| 6 | 7.95794800   | 5.73906500   | -1.40551500 | 1 | 5.35709100   | 10.59210300  | 0.07542800  |
| 6 | 7.00503300   | 4.79232700   | -1.62790900 | 1 | 4.27881100   | 8.57851700   | -0.59928200 |
| 6 | 4.99757500   | 2.68867100   | -2.04895800 | 1 | 7.31770300   | 14.27322900  | 1.18620600  |
| 6 | 4.16909000   | 1.61394400   | -2.14641800 | 1 | 6.21649100   | 12.22964100  | 0.64300500  |
| 6 | 2.55037700   | -0.82489900  | -2.23455600 | 1 | 3.55131300   | 18.92716600  | 1.03539100  |
| 6 | 1.89187800   | -2.01505600  | -2.21236500 | 1 | 2.39651900   | 16.83946800  | 0.63817800  |
| 6 | 0.69430600   | -4.68033800  | -2.02518700 | 1 | 10.30654800  | 21.44762200  | 1.49901500  |
| 6 | 0.21295200   | -5.94533400  | -1.89062000 | 1 | 7.85813800   | 21.45528800  | 1.51321800  |
| 6 | -0.54337900  | -8.74025300  | -1.39388000 | 1 | 15.64622400  | 16.63908600  | 0.49176600  |
| 6 | -0.86908500  | -10.03807600 | -1.14263700 | 1 | 14.59251800  | 18.80608700  | 0.92155800  |
| 6 | -1.46790100  | -12.85819900 | -0.48213000 | 1 | -1.69649400  | -16.85354400 | -0.27978800 |
| 6 | -1.80666600  | -14.15621000 | -0.24045500 | 1 | -2.63373600  | -19.08876500 | -0.20396400 |
| 6 | -12.67866400 | -11.27149700 | 0.64941800  | 1 | -9.18418000  | -22.05199100 | 0.76719800  |
| 6 | -13.40302800 | -12.40668700 | 0.82096600  | 1 | -6.75484300  | -21.98387300 | 0.47102200  |
| 6 | -10.39915800 | -7.69615600  | -0.14054600 | 1 | -14.68175300 | -17.33152000 | 1.16194400  |
| 6 | -11.11102400 | -8.81900900  | 0.14705400  | 1 | -13.52689100 | -19.49330300 | 1.16388600  |
| 6 | -8.20887900  | -4.14777800  | -1.14135500 | 1 | 14.99024200  | 11.70293000  | -0.44507400 |
| 6 | -8.89549100  | -5.27588100  | -0.81892900 | 1 | 13.46438900  | 9.82591600   | -0.59266400 |
| 6 | -6.07950000  | -0.53144000  | -1.99104700 | 1 | 12.01240800  | 8.53008400   | -1.08086500 |
| 6 | -6.75269300  | -1.69023900  | -1.76219500 | 1 | 10.32948200  | 6.87726000   | -1.48858300 |
| 6 | -3.96395700  | 3.18369500   | -2.29338600 | 1 | 8.84454800   | 5.73627100   | -2.03687300 |
| 6 | -4.63345100  | 1.99993800   | -2.27190500 | 1 | 7.17830600   | 4.06608900   | -2.41945600 |
| 6 | -1.87782300  | 6.91107700   | -1.88794300 | 1 | 5.76174500   | 2.82093000   | -2.81224100 |
| 6 | -2.53121900  | 5.73572500   | -2.09348100 | 1 | 4.31406800   | 0.92988200   | -2.97958700 |
| 6 | 0.13331100   | 10.58458400  | -0.93155400 | 1 | 3.24251000   | -0.63822100  | -3.05260000 |
| 6 | -0.49344400  | 9.42648100   | -1.27471600 | 1 | 2.08733200   | -2.72327300  | -3.01442700 |
| 6 | 2.09970600   | 14.25594100  | 0.16937800  | 1 | 1.35961500   | -4.47165300  | -2.85999600 |
| 6 | 1.47991300   | 13.09190400  | -0.17033900 | 1 | 0.50564800   | -6.68958300  | -2.62851800 |
| 1 | 5.68744700   | 20.19004900  | 1.33210500  | 1 | 0.18643500   | -8.53583100  | -2.17467400 |
| 1 | 8.17681300   | 15.91918900  | 1.44032600  | 1 | -0.39607300  | -10.81404300 | -1.74171500 |
| 1 | 12.46868000  | 20.14808700  | 1.29286700  | 1 | -0.63835000  | -12.66125800 | -1.15902100 |
| 1 | 9.94660000   | 15.93478300  | 1.81828100  | 1 | -1.24662100  | -14.94149000 | -0.74653800 |
| 1 | 15.38019600  | 14.14313400  | 0.10154400  | 1 | -13.21559100 | -10.33511900 | 0.50955100  |
| 1 | 10.84178100  | 14.36647100  | 2.06078100  | 1 | -14.49425500 | -12.36497300 | 0.81404200  |
| 1 | -7.05379200  | -16.70127100 | 2.10933000  | 1 | -10.95012700 | -6.77320700  | -0.30751300 |

1 -12.19515700 -8.73974500 0.19656600  
 1 -8.77541300 -3.23233900 -1.29624500  
 1 -9.97769600 -5.20837300 -0.73321500  
 1 -6.65695800 0.38583600 -2.08315600  
 1 -7.83645300 -1.64383500 -1.68268600  
 1 -4.54742400 4.10197800 -2.29020500  
 1 -5.72078200 2.02795300 -2.25314600  
 1 -2.47053100 7.82056100 -1.81539300  
 1 -3.61579100 5.76080200 -2.17568400  
 1 -0.46888200 11.48663400 -0.84408200  
 1 -1.56768800 9.45736200 -1.44428900  
 1 1.49765800 15.16113700 0.22562200  
 1 0.41044000 13.12242300 -0.36906300

6 5.93075200 8.23535700 0.02685600  
 6 6.26138000 7.01572400 0.69210700  
 6 7.60914400 6.80853800 1.05328900  
 6 5.62172200 4.90278300 1.80526800  
 6 5.27163000 5.99848700 0.99213600  
 6 3.95598900 6.01946900 0.43393700  
 6 3.08141700 4.98551600 0.61509100  
 6 3.40485700 3.86209400 1.43680600  
 6 4.65083600 3.87294900 2.09678400  
 6 2.85833000 1.69075700 2.49167400  
 6 2.52082300 2.72171600 1.59209300  
 6 1.32541100 2.56594000 0.82450600  
 6 0.57228000 1.42857400 0.88661800  
 6 0.91626000 0.34218000 1.74892500  
 6 2.02800600 0.51187800 2.59863900  
 6 0.59685600 -1.95484600 2.61366300  
 6 0.19006300 -0.91425000 1.75434700  
 6 -0.92162500 -1.16602300 0.89247900  
 6 -1.53075100 -2.38697500 0.83946700  
 6 -1.07312800 -3.49287400 1.62054000  
 6 -0.01521700 -3.26171300 2.52250200  
 6 -1.01863900 -5.90660500 2.15944000  
 6 -1.62050500 -4.82927200 1.47717600  
 6 -2.74477700 -5.11876800 0.64407600  
 6 -3.20383100 -6.39407300 0.47290300  
 6 -2.54073100 -7.51725500 1.05734500  
 6 -1.42845300 -7.26490300 1.88434000  
 6 -2.08795200 -9.94792000 1.16552600  
 6 -2.92786900 -8.88562700 0.77072700  
 6 -4.13662100 -9.21312500 0.08433400  
 6 -4.45608900 -10.50440100 -0.22627500  
 6 -3.56100900 -11.58626500 0.04290500  
 6 -2.36244000 -11.29680200 0.72207400  
 6 -2.84059200 -13.94338000 -0.27048400  
 6 -3.83153700 -12.94200400 -0.39584500  
 6 -5.08427000 -13.30659900 -0.96432900  
 6 -5.33000100 -14.58167700 -1.38358700  
 6 -4.33044400 -15.59460400 -1.32912400  
 6 -3.06979400 -15.26810500 -0.80415700  
 6 -9.60553100 -13.18543000 0.37516700  
 6 -10.25679900 -11.94176300 0.14393600  
 6 -11.50588800 -11.94572800 -0.51918900  
 6 -12.02802900 -13.17876900 -1.07048300  
 6 -11.26437400 -14.34881100 -0.95913900  
 6 -10.09054900 -14.34000500 -0.15537600  
 6 -7.72429900 -9.49430800 1.45243300  
 6 -8.38106400 -8.23916900 1.28525600  
 6 -9.68527000 -8.23616400 0.74559300  
 6 -10.32141600 -9.48015900 0.36498000  
 6 -9.64458000 -10.69904800 0.55654900  
 6 -8.32879200 -10.66565000 1.11066600  
 6 -5.79871900 -5.77724000 2.49606200  
 6 -6.42866300 -4.51758000 2.26454100  
 6 -7.73886300 -4.52185500 1.74181000  
 6 -8.39896500 -5.77051300 1.43122800  
 6 -7.73183700 -6.99404500 1.63828300  
 6 -6.41587900 -6.95510700 2.19319000  
 6 -3.77739100 -2.01365000 3.22800600  
 6 -4.39071200 -0.76454400 2.90941200  
 6 -5.72110600 -0.78643400 2.44302400  
 6 -6.40843800 -2.04320500 2.25147600  
 6 -5.75499000 -3.26127800 2.52792300  
 6 -4.42502300 -3.20106200 3.04554000  
 6 -1.63919000 1.75497200 3.46265200  
 6 -2.23805200 2.97718800 3.03122700  
 6 -3.59820600 2.94568300 2.66175500  
 6 -4.32383200 1.69631000 2.65081300  
 6 -3.68226300 0.49593000 3.01769600

### 32. [46]clarene

<2,2,18,2,2,20>

E(wB97XD/cc-pVDZ) = -7065.71275241  
 No imaginary frequency (B3LYP/6-31G\*)

6 9.81310400 18.37379900 -2.62720200  
 6 9.28702800 19.55881500 -3.20740600  
 6 7.93741700 19.86281500 -2.98987000  
 6 7.10573600 19.02374100 -2.22151900  
 6 7.68165600 17.91290000 -1.54899500  
 6 9.02883000 17.63602600 -1.75715000  
 6 13.66329300 16.90393100 -3.76849100  
 6 13.25907600 18.19825400 -4.13793800  
 6 11.98740600 18.69868400 -3.81023600  
 6 11.13250200 17.89633400 -3.01530700  
 6 11.52457900 16.60639500 -2.69101000  
 6 12.74012000 16.07236500 -3.08353700  
 6 14.69034200 12.89797600 -2.63119400  
 6 14.37985200 14.20467700 -3.01811900  
 6 13.06030000 14.67998100 -2.79113200  
 6 12.09271600 13.80597000 -2.31058700  
 6 12.37803000 12.48798100 -1.95651300  
 6 13.72426700 12.04154300 -2.07240300  
 6 -3.52513500 -17.89047400 -1.89757400  
 6 -4.58348400 -16.94223900 -1.82088400  
 6 -5.85726600 -17.34993000 -2.21519000  
 6 -6.12040000 -18.62507100 -2.70097800  
 6 -5.04656000 -19.53698900 -2.88593700  
 6 -3.77175900 -19.15732600 -2.45696000  
 6 -7.47664900 -19.03612000 -3.04565600  
 6 -8.55657400 -18.24028700 -2.70280400  
 6 -9.85680900 -18.53579200 -3.08382700  
 6 -10.09889500 -19.67933400 -3.88410100  
 6 -9.02374600 -20.54085700 -4.16067700  
 6 -7.71548500 -20.25215800 -3.73650500  
 6 -10.72024400 -16.56552200 -1.87992200  
 6 -11.63058800 -15.52533300 -1.72414000  
 6 -12.84865300 -15.57504000 -2.45330000  
 6 -13.13604400 -16.71858000 -3.22515900  
 6 -12.19995100 -17.74690700 -3.39034700  
 6 -10.93764100 -17.61864400 -2.75168700  
 6 11.69673900 10.32281300 -0.96941300  
 6 11.34380700 11.58909400 -1.46257400  
 6 9.96776600 11.95526400 -1.48072100  
 6 8.99174600 11.10230600 -1.05430700  
 6 9.30888600 9.82478500 -0.51325800  
 6 10.67225600 9.45824600 -0.42614400  
 6 8.63420400 7.71919500 0.59361000  
 6 8.27577400 8.91201600 -0.06234500  
 6 6.88650100 9.15663500 -0.29535300



|   |              |              |             |   |              |              |             |
|---|--------------|--------------|-------------|---|--------------|--------------|-------------|
| 6 | -2.32663400  | 0.57575700   | 3.45840200  | 6 | 0.23029300   | 11.39371500  | 1.08216100  |
| 6 | 0.61174200   | 5.44670000   | 3.07188100  | 6 | 3.23755700   | 15.98032000  | -0.41897200 |
| 6 | 0.00220700   | 6.64275000   | 2.58366500  | 6 | 2.50647600   | 14.90653000  | -0.00254000 |
| 6 | -1.38296600  | 6.61531800   | 2.32352700  | 1 | 7.50405600   | 20.74607000  | -3.46663700 |
| 6 | -2.13366000  | 5.39239900   | 2.49503300  | 1 | 9.45856700   | 16.76658100  | -1.27450300 |
| 6 | -1.49232500  | 4.21723000   | 2.93717400  | 1 | 13.94728300  | 18.82578500  | -4.71066900 |
| 6 | -0.10026500  | 4.29503400   | 3.24405200  | 1 | 10.84228400  | 15.97918700  | -2.13107600 |
| 6 | 2.88606700   | 9.04384400   | 2.24705100  | 1 | 15.71047400  | 12.52772000  | -2.76326900 |
| 6 | 2.26072200   | 10.22308400  | 1.73749400  | 1 | 11.07278200  | 14.16009500  | -2.20636300 |
| 6 | 0.86291000   | 10.20716500  | 1.56182600  | 1 | -6.67324000  | -16.63912300 | -2.14193300 |
| 6 | 0.10795500   | 9.00871500   | 1.85313700  | 1 | -2.94069700  | -19.86044800 | -2.55764900 |
| 6 | 0.75915500   | 7.85390800   | 2.33497200  | 1 | -8.37137100  | -17.33431300 | -2.13934000 |
| 6 | 2.17035800   | 7.91997800   | 2.53846600  | 1 | -9.20555100  | -21.45160300 | -4.73767900 |
| 6 | 5.15167900   | 12.56163800  | 1.19789500  | 1 | -9.77524200  | -16.50892400 | -1.35329700 |
| 6 | 4.52008500   | 13.74029400  | 0.69654500  | 1 | -14.09507700 | -16.77884900 | -3.74658800 |
| 6 | 3.12096100   | 13.73689300  | 0.54501600  | 1 | 9.66271100   | 12.92399900  | -1.87307500 |
| 6 | 2.36024100   | 12.56018900  | 0.91045700  | 1 | 7.95496400   | 11.42998800  | -1.11713700 |
| 6 | 3.01723500   | 11.41039400  | 1.39887500  | 1 | 6.56583400   | 10.07766600  | -0.78014400 |
| 6 | 4.43724800   | 11.45029500  | 1.52790100  | 1 | 4.89069200   | 8.46148200   | -0.20916400 |
| 6 | 7.45219700   | 15.93749100  | -0.03776600 | 1 | 3.64374200   | 6.85676500   | -0.18871900 |
| 6 | 6.85996200   | 16.99062400  | -0.78881000 | 1 | 2.10546300   | 5.04373700   | 0.13474900  |
| 6 | 5.46304300   | 17.08522600  | -0.85324300 | 1 | 1.00943300   | 3.35763200   | 0.14688100  |
| 6 | 4.66169700   | 16.00700200  | -0.31272800 | 1 | -0.31313000  | 1.36164200   | 0.25641800  |
| 6 | 5.29043100   | 14.89609000  | 0.29614700  | 1 | -1.30336800  | -0.37161500  | 0.25315700  |
| 6 | 6.70023400   | 14.93162800  | 0.48444400  | 1 | -2.37199400  | -2.51407500  | 0.15991300  |
| 6 | 5.67842700   | 19.18052200  | -2.12370900 | 1 | -3.27340300  | -4.30799300  | 0.14442600  |
| 6 | 4.90275100   | 18.24492100  | -1.50788600 | 1 | -4.07603200  | -6.54761000  | -0.16100100 |
| 6 | 11.46545200  | 19.97269300  | -4.27217300 | 1 | -4.84280300  | -8.42577100  | -0.17996700 |
| 6 | 10.18773300  | 20.35930300  | -4.01862700 | 1 | -5.40383000  | -10.68925700 | -0.73004800 |
| 6 | 15.32505100  | 15.10240600  | -3.65725300 | 1 | -5.88090400  | -12.56952800 | -1.05603500 |
| 6 | 14.97931900  | 16.35747900  | -4.04190800 | 1 | -6.31215100  | -14.80137900 | -1.79895700 |
| 6 | -2.03220300  | -16.27023200 | -0.85152400 | 1 | -8.70367300  | -13.23191500 | 0.98213300  |
| 6 | -2.23712400  | -17.49947800 | -1.39464000 | 1 | -9.56216300  | -15.26849600 | 0.05426800  |
| 6 | -6.58063800  | -21.12768900 | -3.96131800 | 1 | -6.71109500  | -9.53573900  | 1.84825700  |
| 6 | -5.33451900  | -20.80564800 | -3.53020100 | 1 | -7.76746600  | -11.58770400 | 1.24947400  |
| 6 | -12.41765900 | -18.93080700 | -4.20329300 | 1 | -4.79246400  | -5.81655200  | 2.90906200  |
| 6 | -11.44257500 | -19.85504400 | -4.40605900 | 1 | -5.87277300  | -7.87949700  | 2.38396800  |
| 6 | 14.03356000  | 10.71808300  | -1.60571600 | 1 | -2.75739000  | -2.03904300  | 3.60814000  |
| 6 | 13.07986300  | 9.91965100   | -1.05689500 | 1 | -3.89187400  | -4.11792400  | 3.29141800  |
| 6 | 10.99080000  | 8.22558900   | 0.22169000  | 1 | -0.60072400  | 1.74099400   | 3.78918300  |
| 6 | 10.02367300  | 7.41663900   | 0.73674900  | 1 | -1.80455100  | -0.32266800  | 3.78291200  |
| 6 | 7.92532100   | 5.68285300   | 1.87065600  | 1 | 1.67517000   | 5.43070000   | 3.30501300  |
| 6 | 6.96942900   | 4.79816300   | 2.26456400  | 1 | 0.42895700   | 3.41402000   | 3.60374000  |
| 6 | 4.93480200   | 2.83463900   | 3.03219800  | 1 | 3.96216900   | 9.02044600   | 2.41248800  |
| 6 | 4.06804900   | 1.80824900   | 3.24008500  | 1 | 2.70830900   | 7.05269500   | 2.91692200  |
| 6 | 2.33298700   | -0.52232300  | 3.53297400  | 1 | 6.23404000   | 12.52106200  | 1.30453700  |
| 6 | 1.65017000   | -1.69734900  | 3.54098900  | 1 | 4.98138900   | 10.57668400  | 1.88249000  |
| 6 | 0.47687900   | -4.35931800  | 3.29079700  | 1 | 8.52648700   | 15.92564500  | 0.13813100  |
| 6 | 0.01537100   | -5.62367600  | 3.10002400  | 1 | 7.20166900   | 14.14935600  | 1.05052600  |
| 6 | -0.67883500  | -8.37637700  | 2.37525200  | 1 | 5.20993300   | 20.04419400  | -2.60055700 |
| 6 | -0.96860200  | -9.65148800  | 1.99882800  | 1 | 3.82220700   | 18.38656200  | -1.51118300 |
| 6 | -1.41622000  | -12.35227900 | 0.90465900  | 1 | 12.11467700  | 20.60952000  | -4.87742900 |
| 6 | -1.62853800  | -13.60075400 | 0.40344000  | 1 | 9.81482200   | 21.30121800  | -4.42741100 |
| 6 | -13.28232200 | -13.26626900 | -1.78210200 | 1 | 16.33441100  | 14.73257700  | -3.85138600 |
| 6 | -13.68868200 | -14.40734700 | -2.40586700 | 1 | 15.70918700  | 16.99177600  | -4.55009300 |
| 6 | -11.61798000 | -9.52485000  | -0.23701800 | 1 | -1.03765300  | -16.03009100 | -0.47814700 |
| 6 | -12.17632200 | -10.69310800 | -0.66657900 | 1 | -1.41525000  | -18.21694500 | -1.44413500 |
| 6 | -9.72373300  | -5.80676300  | 0.90022000  | 1 | -6.75170000  | -22.07792700 | -4.47225300 |
| 6 | -10.33656700 | -6.97861600  | 0.57576400  | 1 | -4.50694300  | -21.50057700 | -3.68975000 |
| 6 | -7.74541000  | -2.08933800  | 1.75540700  | 1 | -13.40159600 | -19.07194700 | -4.65640100 |
| 6 | -8.37932100  | -3.26814400  | 1.51429100  | 1 | -11.65020700 | -20.73773500 | -5.01527400 |
| 6 | -5.68799200  | 1.63711800   | 2.23799500  | 1 | 15.06250000  | 10.36101900  | -1.68613200 |
| 6 | -6.35335600  | 0.45575400   | 2.13983000  | 1 | 13.37230100  | 8.92937500   | -0.71026000 |
| 6 | -3.52678800  | 5.33223700   | 2.19469100  | 1 | 12.03097900  | 7.92416300   | 0.33479700  |
| 6 | -4.22277500  | 4.16701600   | 2.27052500  | 1 | 10.33107300  | 6.49426400   | 1.22651700  |
| 6 | -1.30174300  | 8.95221100   | 1.64518400  | 1 | 8.94630200   | 5.53060900   | 2.21635800  |
| 6 | -2.00986900  | 7.81223000   | 1.86526100  | 1 | 7.26804600   | 3.96438200   | 2.89684600  |
| 6 | 0.94109200   | 12.51376600  | 0.77534100  | 1 | 5.85539200   | 2.85970500   | 3.61218000  |

1 4.33963500 1.04759500 3.96849900  
 1 3.13045200 -0.38689200 4.26030700  
 1 1.93227100 -2.44988400 4.27401700  
 1 1.26608800 -4.20685700 4.02353200  
 1 0.44485500 -6.42602600 3.69680600  
 1 0.18220800 -8.21298500 3.02019200  
 1 -0.33768000 -10.45721400 2.37004000  
 1 -0.47491400 -12.15578600 1.41501400  
 1 -0.85533800 -14.35385000 0.54727900  
 1 -13.93423000 -12.39397200 -1.82438100  
 1 -14.64802300 -14.42765300 -2.92748000  
 1 -12.17938800 -8.60425000 -0.38698300  
 1 -13.15346500 -10.65418200 -1.14664800  
 1 -10.27453200 -4.88173900 0.74295200  
 1 -11.34816900 -6.93722600 0.17606200  
 1 -8.28620200 -1.16788600 1.55139100  
 1 -9.39633000 -3.23387800 1.12950100  
 1 -6.22295200 2.54811500 1.97925600  
 1 -7.38921500 0.47837200 1.80885300  
 1 -4.06030100 6.22685700 1.88157000  
 1 -5.27970200 4.18564600 2.01451400  
 1 -1.83922800 9.82903300 1.29047200  
 1 -3.08088700 7.83229800 1.67664500  
 1 0.39782800 13.38607200 0.41654600  
 1 -0.84963600 11.42305300 0.95321500  
 1 2.71042900 16.82722400 -0.85677000  
 1 1.42494500 14.94798200 -0.11973300

6 -13.63440900 -12.86071200 -0.00841000  
 6 -15.05511400 -12.91312200 -0.00848900  
 6 -15.69564000 -14.16039200 -0.00819300  
 6 -14.98028500 -15.35555900 -0.00777500  
 6 -13.55441800 -15.31252900 -0.00757700  
 6 12.96780200 15.66282600 0.00665200  
 6 12.23610000 16.90607300 0.00640000  
 6 10.82563300 16.89317600 0.00530500  
 6 10.16271600 15.64013000 0.00444600  
 6 10.85605300 14.46372700 0.00475100  
 6 12.27332400 14.43645800 0.00589800  
 6 13.11128900 8.23426400 0.00611000  
 6 12.37057500 9.42986900 0.00574100  
 6 10.95161600 9.34637000 0.00496000  
 6 10.30251600 8.14758700 0.00461700  
 6 11.01366300 6.91553600 0.00498600  
 6 12.42539300 6.96132400 0.00568300  
 6 11.04833300 4.43644100 0.00491100  
 6 10.32152300 5.64322300 0.00465300  
 6 8.89706500 5.57123900 0.00408800  
 6 8.23990300 4.37947500 0.00379100  
 6 8.93961000 3.13656100 0.00400100  
 6 10.34924700 3.16694700 0.00454900  
 6 8.95057500 0.65806000 0.00381900  
 6 8.23521100 1.87259900 0.00366000  
 6 6.80967900 1.81433700 0.00316000  
 6 6.14114700 0.62921400 0.00282700  
 6 6.82875100 -0.62094000 0.00294200  
 6 8.23841800 -0.60469700 0.00343800  
 6 6.81518600 -3.09940300 0.00263500  
 6 6.11184700 -1.87772600 0.00255100  
 6 4.68576300 -1.92194900 0.00206900  
 6 4.00562800 -3.10041100 0.00167300  
 6 4.68083900 -4.35733300 0.00171300  
 6 6.09056000 -4.35509900 0.00220500  
 6 4.64259500 -6.83552100 0.00129700  
 6 3.95142200 -5.60686800 0.00125600  
 6 2.52499800 -5.63678400 0.00074700  
 6 1.83320200 -6.80844100 0.00029000  
 6 2.49590200 -8.07191600 0.00030000  
 6 3.90548600 -8.08388400 0.00081800  
 6 2.43249400 -10.54985700 -0.00016600  
 6 1.75377700 -9.31403600 -0.00020500  
 6 0.32753100 -9.32948500 -0.00075100  
 6 -0.37590800 -10.49448400 -0.00123400  
 6 0.27418000 -11.76399500 -0.00121300  
 6 1.68275100 -11.79009200 -0.00066800  
 6 0.18452900 -14.24498300 -0.00160500  
 6 -0.48160800 -12.99947000 -0.00171700  
 6 -1.90419700 -12.99922300 -0.00232700  
 6 -2.61798700 -14.16060600 -0.00277200  
 6 -1.98085500 -15.43125000 -0.00262500  
 6 -0.57508100 -15.47531000 -0.00203100  
 6 -6.36596300 -17.84860600 -0.00456200  
 6 -7.09765600 -16.63454900 -0.00498400  
 6 -8.46312500 -16.62156600 -0.00551800  
 6 -9.21749400 -17.82177700 -0.00563700  
 6 -8.52394600 -19.05007400 -0.00521800  
 6 -7.08139000 -19.06289400 -0.00471700  
 6 -10.91158100 -10.26301800 -0.00941900  
 6 -11.63622500 -9.03819200 -0.00975400  
 6 -13.04706200 -9.09772200 -0.00957600  
 6 -13.72029200 -10.37837200 -0.00918800  
 6 -12.96600200 -11.56632100 -0.00883900  
 6 -11.54738600 -11.46802200 -0.00894900  
 6 -8.88603900 -6.47852100 -0.01110100  
 6 -9.59676700 -5.24193900 -0.01110000  
 6 -11.00602900 -5.28394300 -0.01067500

### 33. [46]clarene

<2,4,16,4,2,18>

E(wB97XD/cc-pVDZ) = -7065.69274425  
 No imaginary frequency (B3LYP/6-31G\*)

6 6.48486000 19.39565400 0.00280500  
 6 5.80973500 20.65233200 0.00311000  
 6 4.41700400 20.67502800 0.00221500  
 6 3.65642500 19.49715500 0.00094500  
 6 4.32083100 18.24030500 0.00044300  
 6 5.72218900 18.23217800 0.00143000  
 6 10.78333400 19.37950700 0.00610100  
 6 10.06257700 20.58160400 0.00606600  
 6 8.66947100 20.60493900 0.00505600  
 6 7.95382800 19.37154100 0.00394200  
 6 8.67818100 18.18322900 0.00403300  
 6 10.07853100 18.14545000 0.00511400  
 6 15.13477900 11.98734000 0.00761000  
 6 14.43157300 13.19410400 0.00727400  
 6 13.00668700 13.17317100 0.00629600  
 6 12.36202300 11.93391900 0.00580000  
 6 13.05399300 10.71945500 0.00618700  
 6 14.47861900 10.75334000 0.00707600  
 6 -2.07364500 -17.91856100 -0.00275400  
 6 -2.75624400 -16.66764100 -0.00303400  
 6 -4.15397800 -16.67496500 -0.00366800  
 6 -4.90528200 -17.85260000 -0.00396100  
 6 -4.21140500 -19.09729300 -0.00361900  
 6 -2.81469200 -19.10351200 -0.00305300  
 6 -10.67559000 -17.80025600 -0.00613200  
 6 -11.40829100 -16.60625700 -0.00663500  
 6 -12.79955700 -16.57289800 -0.00703500  
 6 -13.51038100 -17.80901600 -0.00688500  
 6 -12.79389000 -19.00396900 -0.00644900  
 6 -11.39247200 -19.02739800 -0.00609000  
 6 -12.92738100 -14.07067900 -0.00792100

|   |              |              |             |   |              |              |             |
|---|--------------|--------------|-------------|---|--------------|--------------|-------------|
| 6 | -11.69419400 | -6.55966500  | -0.01032900 | 6 | -4.97656100  | -20.31417500 | -0.00385700 |
| 6 | -10.95635500 | -7.75988400  | -0.01023400 | 6 | -15.15741600 | -10.48049000 | -0.00918000 |
| 6 | -9.53257900  | -7.67569600  | -0.01064100 | 6 | -15.79072600 | -11.68112900 | -0.00888100 |
| 6 | -6.81753400  | -2.71503800  | -0.01240600 | 6 | -13.11987100 | -6.65639200  | -0.01009000 |
| 6 | -7.51423400  | -1.47004000  | -0.01203000 | 6 | -13.76127300 | -7.85926900  | -0.00977500 |
| 6 | -8.92372300  | -1.49575400  | -0.01143100 | 6 | -11.05274700 | -2.84355800  | -0.01076700 |
| 6 | -9.62695100  | -2.76366900  | -0.01123700 | 6 | -11.70751400 | -4.04006000  | -0.01054000 |
| 6 | -8.90248600  | -3.97277000  | -0.01148900 | 6 | -8.94270500  | 0.94487900   | -0.01099200 |
| 6 | -7.47747600  | -3.90465300  | -0.01211300 | 6 | -9.61101300  | -0.24415200  | -0.01096300 |
| 6 | -4.70646400  | 1.02515900   | -0.01286900 | 6 | -6.79004800  | 4.70896900   | -0.01041900 |
| 6 | -5.38900100  | 2.27802800   | -0.01208500 | 6 | -7.47177200  | 3.52758300   | -0.01068100 |
| 6 | -6.79867100  | 2.26829900   | -0.01146600 | 6 | -4.59454600  | 8.44847400   | -0.00889100 |
| 6 | -7.51623500  | 1.00840700   | -0.01155800 | 6 | -5.28981600  | 7.27499200   | -0.00948000 |
| 6 | -6.80553100  | -0.20894600  | -0.01217100 | 6 | -2.35582300  | 12.16259600  | -0.00645000 |
| 6 | -5.37979600  | -0.15691000  | -0.01288900 | 6 | -3.06460700  | 10.99727500  | -0.00732800 |
| 6 | -2.55319300  | 4.74121800   | -0.01201000 | 6 | -0.07467100  | 15.85081400  | -0.00336700 |
| 6 | -3.22152600  | 6.00168300   | -0.01094100 | 6 | -0.79592700  | 14.69404400  | -0.00445600 |
| 6 | -4.63120500  | 6.00803100   | -0.01047600 | 1 | 3.90017100   | 21.63823100  | 0.00251500  |
| 6 | -5.36297300  | 4.75632600   | -0.01093400 | 1 | 6.23542200   | 17.27558100  | 0.00112400  |
| 6 | -4.66603900  | 3.53098700   | -0.01184200 | 1 | 10.61096100  | 21.52718900  | 0.00688800  |
| 6 | -3.23980400  | 3.56683900   | -0.01243800 | 1 | 8.13363600   | 17.24407700  | 0.00328300  |
| 6 | -0.35757000  | 8.43183100   | -0.00975400 | 1 | 16.22762100  | 12.00846000  | 0.00833300  |
| 6 | -1.01138600  | 9.69983600   | -0.00856600 | 1 | 11.27702300  | 11.91276300  | 0.00511200  |
| 6 | -2.42080900  | 9.72258400   | -0.00838700 | 1 | -4.67765900  | -15.72442200 | -0.00393800 |
| 6 | -3.16699700  | 8.47947200   | -0.00920700 | 1 | -2.28692500  | -20.06069900 | -0.00282400 |
| 6 | -2.48419400  | 7.24619300   | -0.01027400 | 1 | -10.86758600 | -15.66486300 | -0.00670000 |
| 6 | -1.05766300  | 7.26544000   | -0.01058800 | 1 | -13.33881700 | -19.95155000 | -0.00636800 |
| 6 | 1.88033600   | 12.09663400  | -0.00626300 | 1 | -11.84226200 | -14.03802700 | -0.00780300 |
| 6 | 1.24128700   | 13.37174400  | -0.00514500 | 1 | -16.78822800 | -14.19381000 | -0.00830100 |
| 6 | -0.16706900  | 13.41088000  | -0.00536400 | 1 | 9.07538800   | 15.59432100  | 0.00353600  |
| 6 | -0.92784100  | 12.17710200  | -0.00646700 | 1 | 10.28895700  | 13.53487600  | 0.00405800  |
| 6 | -0.25952900  | 10.93568900  | -0.00752100 | 1 | 10.35030300  | 10.25351100  | 0.00463600  |
| 6 | 1.16677300   | 10.93820900  | -0.00743900 | 1 | 9.21470200   | 8.15462300   | 0.00402500  |
| 6 | 4.15762000   | 15.73675000  | -0.00187800 | 1 | 8.30279500   | 6.48249600   | 0.00390900  |
| 6 | 3.53365500   | 17.01457300  | -0.00102600 | 1 | 7.15215000   | 4.39575200   | 0.00337600  |
| 6 | 2.12778300   | 17.07433300  | -0.00166800 | 1 | 6.22455200   | 2.73149600   | 0.00304600  |
| 6 | 1.35500000   | 15.85120500  | -0.00296000 | 1 | 5.05359000   | 0.65591200   | 0.00245800  |
| 6 | 2.00859700   | 14.59947100  | -0.00381200 | 1 | 4.10956000   | -0.99918400  | 0.00201400  |
| 6 | 3.43168900   | 14.58383500  | -0.00325700 | 1 | 2.91837100   | -3.06314700  | 0.00132100  |
| 6 | 2.22163200   | 19.51876000  | 0.00013700  | 1 | 1.95794500   | -4.70837300  | 0.00071400  |
| 6 | 1.49812000   | 18.37020800  | -0.00104400 | 1 | 0.74635200   | -6.76060000  | -0.00008300 |
| 6 | 7.93525700   | 21.85317100  | 0.00518400  | 1 | -0.23017600  | -8.39540200  | -0.00078700 |
| 6 | 6.58479000   | 21.87559300  | 0.00432200  | 1 | -1.46223600  | -10.43584100 | -0.00162400 |
| 6 | 15.10340100  | 14.46492000  | 0.00792100  | 1 | -2.45361400  | -12.06028100 | -0.00245500 |
| 6 | 14.41153600  | 15.63035000  | 0.00766200  | 1 | -3.70429400  | -14.09375400 | -0.00322100 |
| 6 | 0.07112300   | -16.76497500 | -0.00182700 | 1 | -6.57610000  | -15.67938600 | -0.00489100 |
| 6 | -0.63710000  | -17.92135600 | -0.00215400 | 1 | -8.96636900  | -15.65662600 | -0.00582200 |
| 6 | -10.65311900 | -20.25818200 | -0.00565800 | 1 | -9.82381100  | -10.25807300 | -0.00948800 |
| 6 | -9.29653000  | -20.26825800 | -0.00526900 | 1 | -10.93672100 | -12.36882400 | -0.00869000 |
| 6 | -15.65266600 | -16.63814300 | -0.00755100 | 1 | -7.79824900  | -6.48537600  | -0.01141300 |
| 6 | -14.95846900 | -17.79673500 | -0.00716400 | 1 | -8.93010500  | -8.58142900  | -0.01063000 |
| 6 | 12.90542900  | 18.18394200  | 0.00728700  | 1 | -5.72989700  | -2.73423000  | -0.01288700 |
| 6 | 12.21891200  | 19.35403900  | 0.00715900  | 1 | -6.88571200  | -4.81745600  | -0.01239900 |
| 6 | 15.19895100  | 9.51047100   | 0.00742200  | 1 | -3.61909700  | 0.99379700   | -0.01344100 |
| 6 | 14.55129300  | 8.31911600   | 0.00695000  | 1 | -4.79835000  | -1.07630800  | -0.01349100 |
| 6 | 13.12781000  | 5.71584700   | 0.00593600  | 1 | -1.46623600  | 4.69780700   | -0.01249600 |
| 6 | 12.47502800  | 4.51950900   | 0.00554700  | 1 | -2.66865500  | 2.64102400   | -0.01324400 |
| 6 | 11.04100400  | 1.91765500   | 0.00472000  | 1 | 0.72883200   | 8.37609600   | -0.01002800 |
| 6 | 10.37692500  | 0.72655300   | 0.00436100  | 1 | -0.49739100  | 6.33297800   | -0.01147400 |
| 6 | 8.91778700   | -1.86057200  | 0.00353500  | 1 | 2.96601200   | 12.02817400  | -0.00623700 |
| 6 | 8.24198300   | -3.04513400  | 0.00314800  | 1 | 1.71612600   | 9.99926000   | -0.00827200 |
| 6 | 6.75743100   | -5.61767100  | 0.00224700  | 1 | 5.24310000   | 15.65839900  | -0.00149100 |
| 6 | 6.06986500   | -6.79545200  | 0.00181600  | 1 | 3.97087100   | 13.63908400  | -0.00387200 |
| 6 | 4.55959900   | -9.35328500  | 0.00084500  | 1 | 1.71403000   | 20.48561700  | 0.00051700  |
| 6 | 3.86027900   | -10.52405600 | 0.00038200  | 1 | 0.41185700   | 18.44213300  | -0.00159800 |
| 6 | 2.32411700   | -13.06721700 | -0.00062900 | 1 | 8.50455600   | 22.78516000  | 0.00605300  |
| 6 | 1.61435400   | -14.23066200 | -0.00106000 | 1 | 6.04665200   | 22.82591500  | 0.00448900  |
| 6 | -6.33180900  | -20.29726300 | -0.00435700 | 1 | 16.19534300  | 14.47631700  | 0.00866500  |

|   |              |              |             |   |              |              |             |
|---|--------------|--------------|-------------|---|--------------|--------------|-------------|
| 1 | 14.97161900  | 16.56357300  | 0.00821200  | 6 | 13.59636100  | 16.03598900  | 0.52633500  |
| 1 | 1.15813500   | -16.82321500 | -0.00136600 | 6 | -7.09773700  | -19.77848000 | 0.68119300  |
| 1 | -0.11790000  | -18.88201200 | -0.00195800 | 6 | -7.78208400  | -18.53221400 | 0.73703400  |
| 1 | -11.20715100 | -21.19922000 | -0.00565100 | 6 | -9.15239400  | -18.54923100 | 0.99072900  |
| 1 | -8.78760700  | -21.23033000 | -0.00495500 | 6 | -9.87489600  | -19.72633000 | 1.14005400  |
| 1 | -16.74474400 | -16.64688600 | -0.00772800 | 6 | -9.21355700  | -20.97484100 | 0.98942600  |
| 1 | -15.48136500 | -18.75553600 | -0.00702300 | 6 | -7.82971200  | -20.97435100 | 0.79409600  |
| 1 | 13.99313200  | 18.22340500  | 0.00812000  | 6 | -11.31626100 | -19.69727400 | 1.36070300  |
| 1 | 12.75729700  | 20.30411900  | 0.00787900  | 6 | -11.96142700 | -18.49886400 | 1.61672500  |
| 1 | 16.29050600  | 9.54091900   | 0.00808400  | 6 | -13.34326900 | -18.37667000 | 1.61240000  |
| 1 | 15.14515500  | 7.40683000   | 0.00724900  | 6 | -14.13418900 | -19.52739800 | 1.36896500  |
| 1 | 14.21624500  | 5.70445900   | 0.00642700  | 6 | -13.49054700 | -20.77040600 | 1.24691800  |
| 1 | 13.07283300  | 3.60962100   | 0.00574800  | 6 | -12.09025800 | -20.87994400 | 1.23969600  |
| 1 | 12.12953500  | 1.89814400   | 0.00513200  | 6 | -13.18313200 | -15.93197100 | 1.94568300  |
| 1 | 10.96605900  | -0.18894600  | 0.00450300  | 6 | -13.62406100 | -14.64154200 | 1.66438300  |
| 1 | 10.00608000  | -1.89077100  | 0.00391900  | 6 | -14.93712700 | -14.47320800 | 1.14672700  |
| 1 | 8.82199800   | -3.96644100  | 0.00324000  | 6 | -15.78074500 | -15.59514900 | 1.04170600  |
| 1 | 7.84536900   | -5.65871400  | 0.00263000  | 6 | -15.30895800 | -16.89021100 | 1.28372500  |
| 1 | 6.64051100   | -7.72261600  | 0.00187500  | 6 | -13.95111100 | -17.05303300 | 1.66884100  |
| 1 | 5.64705700   | -9.40534700  | 0.00125000  | 6 | 12.16175000  | 13.56434300  | 0.18872400  |
| 1 | 4.42151500   | -11.45695300 | 0.00044000  | 6 | 11.45256600  | 14.75680100  | 0.40363400  |
| 1 | 3.41101700   | -13.12995700 | -0.00024000 | 6 | 10.02925800  | 14.71981300  | 0.37030700  |
| 1 | 2.16834700   | -15.16762900 | -0.00099600 | 6 | 9.34610100   | 13.56761400  | 0.11172000  |
| 1 | -6.86028400  | -21.24875900 | -0.00450700 | 6 | 10.02450300  | 12.33335800  | -0.09146300 |
| 1 | -4.44079200  | -21.26571000 | -0.00361000 | 6 | 11.43692300  | 12.32915400  | -0.01228500 |
| 1 | -15.76257500 | -9.57555500  | -0.00946600 | 6 | 9.99707300   | 9.88372900   | -0.41946300 |
| 1 | -16.88185500 | -11.72463700 | -0.00892900 | 6 | 9.30040400   | 11.10554900  | -0.36015800 |
| 1 | -13.72626700 | -5.75213800  | -0.01020500 | 6 | 7.88884700   | 11.08331600  | -0.58471400 |
| 1 | -14.84983700 | -7.85857600  | -0.00964100 | 6 | 7.22539900   | 9.92716000   | -0.88231600 |
| 1 | -11.64900700 | -1.93262100  | -0.01060300 | 6 | 7.89474800   | 8.66673700   | -0.91107400 |
| 1 | -12.79620900 | -4.02919100  | -0.01018700 | 6 | 9.27545000   | 8.64753400   | -0.62075100 |
| 1 | -9.52860400  | 1.86249900   | -0.01056900 | 6 | 7.85458500   | 6.19912000   | -0.97418900 |
| 1 | -10.69952200 | -0.22099600  | -0.01050500 | 6 | 7.19582600   | 7.42573400   | -1.18664500 |
| 1 | -7.36542800  | 5.63323700   | -0.00977000 | 6 | 5.85983600   | 7.38385900   | -1.69239000 |
| 1 | -8.55994900  | 3.56306900   | -0.01021700 | 6 | 5.22731600   | 6.20138000   | -1.95553300 |
| 1 | -5.15909200  | 9.37942500   | -0.00811000 | 6 | 5.82781600   | 4.94340800   | -1.64424400 |
| 1 | -6.37750200  | 7.32307300   | -0.00913600 | 6 | 7.13473100   | 4.95600200   | -1.11502800 |
| 1 | -2.90959800  | 13.09998700  | -0.00564600 | 6 | 5.70317300   | 2.49965700   | -1.29680900 |
| 1 | -4.15165200  | 11.05804300  | -0.00719400 | 6 | 5.13192900   | 3.68079400   | -1.80970800 |
| 1 | -0.61933900  | 16.79332600  | -0.00273300 | 6 | 3.87788600   | 3.56882300   | -2.48460100 |
| 1 | -1.88222000  | 14.76728300  | -0.00465900 | 6 | 3.22912500   | 2.37296300   | -2.60729800 |
|   |              |              |             | 6 | 3.73491700   | 1.17548000   | -2.01400300 |
|   |              |              |             | 6 | 4.97173100   | 1.25594100   | -1.34271500 |
|   |              |              |             | 6 | 3.53677500   | -1.20873200  | -1.37776800 |
|   |              |              |             | 6 | 3.02049700   | -0.08728200  | -2.05783400 |
|   |              |              |             | 6 | 1.79000300   | -0.25504500  | -2.76369000 |
|   |              |              |             | 6 | 1.10966000   | -1.43893600  | -2.75980700 |
|   |              |              |             | 6 | 1.58393600   | -2.58163600  | -2.04566000 |
|   |              |              |             | 6 | 2.81336100   | -2.45872000  | -1.36724600 |
|   |              |              |             | 6 | 1.39402100   | -4.93200000  | -1.29452000 |
|   |              |              |             | 6 | 0.85028300   | -3.83280300  | -1.98952800 |
|   |              |              |             | 6 | -0.43135600  | -4.00699700  | -2.59673600 |
|   |              |              |             | 6 | -1.13981600  | -5.16755300  | -2.46713100 |
|   |              |              |             | 6 | -0.61677000  | -6.29622200  | -1.76495800 |
|   |              |              |             | 6 | 0.68298900   | -6.18705900  | -1.23269300 |
|   |              |              |             | 6 | -0.72674500  | -8.65465300  | -1.02589600 |
|   |              |              |             | 6 | -1.36140000  | -7.52952900  | -1.59123500 |
|   |              |              |             | 6 | -2.74309100  | -7.65046700  | -1.93232800 |
|   |              |              |             | 6 | -3.45225500  | -8.78733200  | -1.66427400 |
|   |              |              |             | 6 | -2.82831100  | -9.95205100  | -1.11992500 |
|   |              |              |             | 6 | -1.44233200  | -9.89919200  | -0.87532700 |
|   |              |              |             | 6 | -2.85215700  | -12.35186300 | -0.50456400 |
|   |              |              |             | 6 | -3.55570100  | -11.17483600 | -0.83712600 |
|   |              |              |             | 6 | -4.98194900  | -11.23025500 | -0.84310600 |
|   |              |              |             | 6 | -5.65495200  | -12.37888000 | -0.53828800 |
|   |              |              |             | 6 | -4.97016600  | -13.60474700 | -0.27076600 |
|   |              |              |             | 6 | -3.56266100  | -13.59313700 | -0.29480300 |
|   |              |              |             | 6 | -4.96303600  | -16.05911500 | 0.12797800  |

### 34. [48]clarene

<2,2,20,2,2,20>

E(wB97XD/cc-pVDZ) = -7372.93027891  
 No imaginary frequency (B3LYP/6-31G\*)

|   |             |             |            |   |             |              |             |
|---|-------------|-------------|------------|---|-------------|--------------|-------------|
| 6 | 7.83527900  | 20.57806500 | 1.78072700 | 6 | -0.43135600 | -4.00699700  | -2.59673600 |
| 6 | 7.00136200  | 21.67744600 | 1.44211800 | 6 | -1.13981600 | -5.16755300  | -2.46713100 |
| 6 | 5.63688200  | 21.44015700 | 1.24150800 | 6 | -0.61677000 | -6.29622200  | -1.76495800 |
| 6 | 5.09260400  | 20.14597100 | 1.34357700 | 6 | 0.68298900  | -6.18705900  | -1.23269300 |
| 6 | 5.91296800  | 19.08661900 | 1.81806000 | 6 | -0.72674500 | -8.65465300  | -1.02589600 |
| 6 | 7.25954000  | 19.34727900 | 2.05797100 | 6 | -1.36140000 | -7.52952900  | -1.59123500 |
| 6 | 12.06280600 | 20.89622000 | 1.21589200 | 6 | -2.74309100 | -7.65046700  | -1.93232800 |
| 6 | 11.26668600 | 22.05208500 | 1.27013200 | 6 | -3.45225500 | -8.78733200  | -1.66427400 |
| 6 | 9.87333500  | 21.98277500 | 1.43689200 | 6 | -2.82831100 | -9.95205100  | -1.11992500 |
| 6 | 9.28248700  | 20.71693800 | 1.67682200 | 6 | -1.44233200 | -9.89919200  | -0.87532700 |
| 6 | 10.08034500 | 19.58288200 | 1.63273800 | 6 | -2.85215700 | -12.35186300 | -0.50456400 |
| 6 | 11.43176400 | 19.63112000 | 1.33378800 | 6 | -3.55570100 | -11.17483600 | -0.83712600 |
| 6 | 14.26655700 | 17.26756900 | 0.63828700 | 6 | -4.98194900 | -11.23025500 | -0.84310600 |
| 6 | 13.57895900 | 18.46103900 | 0.87455700 | 6 | -5.65495200 | -12.37888000 | -0.53828800 |
| 6 | 12.17253400 | 18.40330200 | 1.06780300 | 6 | -4.97016600 | -13.60474700 | -0.27076600 |
| 6 | 11.51247200 | 17.18996100 | 0.91858300 | 6 | -3.56266100 | -13.59313700 | -0.29480300 |
| 6 | 12.17728400 | 16.00063200 | 0.62511000 | 6 | -4.96303600 | -16.05911500 | 0.12797800  |

|   |              |              |             |   |              |              |             |
|---|--------------|--------------|-------------|---|--------------|--------------|-------------|
| 6 | -5.67419000  | -14.84237200 | 0.00555800  | 6 | -10.02381800 | -22.17928000 | 0.99585300  |
| 6 | -7.08695600  | -14.87246200 | 0.17274300  | 6 | -16.10469900 | -18.09112400 | 1.10071400  |
| 6 | -7.74646900  | -16.03701600 | 0.43673100  | 6 | -15.55942200 | -19.33240800 | 1.17570400  |
| 6 | -7.06451700  | -17.28498600 | 0.51211400  | 6 | 14.28244300  | 14.79622800  | 0.28881600  |
| 6 | -5.67184900  | -17.30261100 | 0.33531300  | 6 | 13.60325300  | 13.62704300  | 0.15002900  |
| 6 | -10.47313800 | -12.68158400 | 2.21564400  | 6 | 12.10700800  | 11.07318400  | -0.12776400 |
| 6 | -10.70358100 | -11.52083900 | 1.42466200  | 6 | 11.42034400  | 9.90927800   | -0.29284500 |
| 6 | -11.99196900 | -11.33041800 | 0.87221600  | 6 | 9.92711100   | 7.38395500   | -0.50414900 |
| 6 | -13.02424600 | -12.32406100 | 1.07064600  | 6 | 9.23995600   | 6.21737300   | -0.63179300 |
| 6 | -12.69800300 | -13.52356700 | 1.71836700  | 6 | 7.71250100   | 3.72473300   | -0.68765000 |
| 6 | -11.42421000 | -13.64950500 | 2.33944600  | 6 | 7.01629100   | 2.55915600   | -0.74279800 |
| 6 | -7.34939800  | -9.80489000  | 1.49420000  | 6 | 5.47082600   | 0.09234000   | -0.68831100 |
| 6 | -7.54225100  | -8.69883100  | 0.61392300  | 6 | 4.78100800   | -1.07784000  | -0.69414600 |
| 6 | -8.79465900  | -8.57503000  | -0.02473900 | 6 | 3.31795500   | -3.58970700  | -0.66102500 |
| 6 | -9.87346700  | -9.48379800  | 0.29662700  | 6 | 2.64684100   | -4.77045900  | -0.63439200 |
| 6 | -9.64245400  | -10.57152700 | 1.15972100  | 6 | 1.27951600   | -7.34074000  | -0.64276800 |
| 6 | -8.34140600  | -10.70927700 | 1.73400300  | 6 | 0.61912300   | -8.52630500  | -0.57370900 |
| 6 | -4.36378500  | -6.69333000  | 0.95628800  | 6 | -0.76996300  | -11.09807900 | -0.49127100 |
| 6 | -4.54423900  | -5.64852000  | -0.00024100 | 6 | -1.43559900  | -12.27616400 | -0.35467000 |
| 6 | -5.69273100  | -5.70459700  | -0.81664500 | 6 | -2.87286000  | -14.83315000 | -0.12448300 |
| 6 | -6.70480400  | -6.71081600  | -0.59183500 | 6 | -3.53795600  | -16.00851700 | 0.04820400  |
| 6 | -6.50189100  | -7.71836200  | 0.37092200  | 6 | -14.37879500 | -12.16349300 | 0.59495900  |
| 6 | -5.28073300  | -7.69207900  | 1.11395500  | 6 | -15.29843700 | -13.16385600 | 0.67255700  |
| 6 | -1.64746400  | -3.29737700  | 0.60296800  | 6 | -11.19194800 | -9.30782600  | -0.22697700 |
| 6 | -1.91725800  | -2.22591700  | -0.30285700 | 6 | -12.20363600 | -10.17370900 | 0.06201800  |
| 6 | -3.00968500  | -2.37820700  | -1.18056700 | 6 | -7.95284300  | -6.67212100  | -1.28389600 |
| 6 | -3.85359600  | -3.54732400  | -1.10793100 | 6 | -8.95764900  | -7.54255900  | -0.99484100 |
| 6 | -3.61133100  | -4.54592700  | -0.14358500 | 6 | -4.96090700  | -3.70884700  | -1.99212400 |
| 6 | -2.45168000  | -4.39864900  | 0.67893500  | 6 | -5.84078100  | -4.73497600  | -1.85072100 |
| 6 | 0.68343400   | 0.39184200   | 0.51552800  | 6 | -2.54392700  | -0.19907600  | -2.14864200 |
| 6 | 0.31406400   | 1.48226500   | -0.33141200 | 6 | -3.27611000  | -1.34360800  | -2.12307500 |
| 6 | -0.74820100  | 1.27116600   | -1.23299200 | 6 | -0.47612300  | 3.52825200   | -2.09195200 |
| 6 | -1.46945300  | 0.02037100   | -1.23897400 | 6 | -1.09909900  | 2.32108800   | -2.13009500 |
| 6 | -1.12828300  | -1.00865000  | -0.33868000 | 6 | 1.17490500   | 7.44365600   | -1.77788800 |
| 6 | -0.00200500  | -0.78929900  | 0.51342700  | 6 | 0.72541800   | 6.17037300   | -1.93271000 |
| 6 | 2.60465500   | 4.30676500   | 0.69489700  | 6 | 2.05087500   | 11.53379600  | -0.86439800 |
| 6 | 2.14674800   | 5.39465100   | -0.11120300 | 6 | 1.79686300   | 10.23301600  | -1.17152200 |
| 6 | 1.14959800   | 5.11847600   | -1.06795200 | 6 | 2.71620400   | 15.64204800  | 0.25436900  |
| 6 | 0.55779900   | 3.80434100   | -1.15150800 | 6 | 2.46899400   | 14.33754000  | -0.05190800 |
| 6 | 0.97656100   | 2.77240300   | -0.28736900 | 1 | 4.99083000   | 22.26415800  | 0.92713100  |
| 6 | 2.04786300   | 3.06240200   | 0.61228500  | 1 | 7.89647800   | 18.52812600  | 2.37348300  |
| 6 | 4.06275300   | 8.39347800   | 1.15488400  | 1 | 11.73807900  | 23.02838500  | 1.12848500  |
| 6 | 3.46168600   | 9.47507100   | 0.43868800  | 1 | 9.61550400   | 18.61353200  | 1.76338300  |
| 6 | 2.46989800   | 9.16150000   | -0.51049600 | 1 | 15.35254300  | 17.29004300  | 0.51439600  |
| 6 | 2.10216300   | 7.78528200   | -0.75091400 | 1 | 10.43160900  | 17.16969600  | 1.00003900  |
| 6 | 2.63956400   | 6.75101400   | 0.04279100  | 1 | -9.67910900  | -17.60292000 | 1.03837200  |
| 6 | 3.65124800   | 7.10281000   | 0.98721100  | 1 | -7.30084600  | -21.92684600 | 0.70319200  |
| 6 | 5.15978000   | 12.54351000  | 1.81278400  | 1 | -11.36061100 | -17.60805000 | 1.75114700  |
| 6 | 4.37496200   | 13.60920100  | 1.27422400  | 1 | -14.09408400 | -21.67065900 | 1.10287000  |
| 6 | 3.29718900   | 13.27754200  | 0.43182500  | 1 | -12.16550300 | -16.06611900 | 2.29572600  |
| 6 | 3.04567600   | 11.89415700  | 0.09171300  | 1 | -16.80736900 | -15.45602500 | 0.69254500  |
| 6 | 3.79467700   | 10.86248800  | 0.69683800  | 1 | 9.45066800   | 15.62863500  | 0.52652200  |
| 6 | 4.86837200   | 11.23573900  | 1.55893100  | 1 | 8.25805000   | 13.60747800  | 0.08223900  |
| 6 | 6.17787400   | 16.67631900  | 2.45002400  | 1 | 7.31151800   | 12.00579600  | -0.54395700 |
| 6 | 5.41169500   | 17.72413200  | 1.86771700  | 1 | 6.15004200   | 9.97632100   | -1.05498600 |
| 6 | 4.19112300   | 17.41446900  | 1.25221200  | 1 | 5.32613200   | 8.31179500   | -1.89787900 |
| 6 | 3.84437100   | 16.02626600  | 1.04095600  | 1 | 4.21510400   | 6.23469300   | -2.35748400 |
| 6 | 4.67104700   | 14.99904600  | 1.55371100  | 1 | 3.42285900   | 4.45259700   | -2.93015000 |
| 6 | 5.81354700   | 15.36997300  | 2.31741600  | 1 | 2.27973900   | 2.35413200   | -3.14098200 |
| 6 | 3.76408400   | 19.80887900  | 0.90625700  | 1 | 1.36439000   | 0.58179600   | -3.31584100 |
| 6 | 3.35806300   | 18.51262200  | 0.81999900  | 1 | 0.17032000   | -1.49453300  | -3.30826400 |
| 6 | 8.98435600   | 23.12108000  | 1.29342900  | 1 | -0.88458600  | -3.18641100  | -3.15130700 |
| 6 | 7.63521700   | 22.97128100  | 1.26025400  | 1 | -2.12495500  | -5.22615300  | -2.92819800 |
| 6 | 14.21443300  | 19.76610500  | 0.88357700  | 1 | -3.27198600  | -6.80142400  | -2.36414200 |
| 6 | 13.49904700  | 20.91242000  | 1.01070100  | 1 | -4.51731000  | -8.79818400  | -1.89574900 |
| 6 | -5.00130300  | -18.58082700 | 0.34056800  | 1 | -5.56081900  | -10.32978700 | -1.04937600 |
| 6 | -5.67486500  | -19.75282500 | 0.48360000  | 1 | -6.74331900  | -12.34303500 | -0.52517500 |
| 6 | -11.37766400 | -22.13374300 | 1.08014100  | 1 | -7.66730100  | -13.95293500 | 0.11022400  |

1 -8.82661500 -15.99068500 0.56373500  
 1 -9.51712400 -12.82900500 2.71428000  
 1 -11.19580000 -14.52779500 2.94191800  
 1 -6.38177300 -9.96162100 1.96811300  
 1 -8.11973700 -11.54549600 2.39451400  
 1 -3.46658000 -6.71463300 1.57305000  
 1 -5.07787800 -8.46418900 1.85441200  
 1 -0.78170800 -3.24520800 1.26152200  
 1 -2.19439100 -5.17610900 1.39678500  
 1 1.53532200 0.49162300 1.18663000  
 1 0.33298400 -1.58048500 1.18271100  
 1 3.41390500 4.46279000 1.40672300  
 1 2.43965800 2.27872900 1.25903700  
 1 4.84650400 8.59320300 1.88394100  
 1 4.12828200 6.32741400 1.58470900  
 1 6.00953100 12.76062000 2.45735700  
 1 5.49928900 10.46915500 2.00597900  
 1 7.07018000 16.91085500 3.02919400  
 1 6.43534200 14.60927400 2.78546800  
 1 3.09734500 20.61055300 0.58145100  
 1 2.36316400 18.30585500 0.42655800  
 1 9.42586200 24.10955600 1.14753000  
 1 6.99555600 23.83843600 1.08092000  
 1 15.29662700 19.81250400 0.74215800  
 1 14.00556500 21.87919300 0.96510800  
 1 -3.92300700 -18.62115400 0.19376500  
 1 -5.13279300 -20.70031000 0.45004600  
 1 -11.95820700 -23.05790600 1.03358600  
 1 -9.51714200 -23.14099600 0.88780000  
 1 -17.16945200 -17.97651900 0.88512600  
 1 -16.18853500 -20.21297100 1.02687900  
 1 15.37242800 14.80452900 0.22134500  
 1 14.17502400 12.71753100 -0.02795900  
 1 13.19272000 11.02669500 -0.06233900  
 1 11.98903300 8.98392300 -0.36296300  
 1 10.98851900 7.33553400 -0.26873600  
 1 9.78338700 5.28285500 -0.50717400  
 1 8.71448200 3.70781100 -0.26395400  
 1 7.49865400 1.65552700 -0.37688400  
 1 6.41042300 0.13035300 -0.14188700  
 1 5.20780300 -1.92329200 -0.16013600  
 1 4.25988300 -3.52667600 -0.12157600  
 1 3.07971700 -5.59262600 -0.06915500  
 1 2.29567900 -7.29667600 -0.25740600  
 1 1.12773000 -9.37492300 -0.12090100  
 1 0.30766700 -11.09477700 -0.34012700  
 1 -0.86563800 -13.16356600 -0.08631700  
 1 -1.78557000 -14.86049600 -0.16617800  
 1 -2.95369000 -16.92171200 0.14757100  
 1 -14.68765100 -11.20717900 0.17373900  
 1 -16.31615300 -12.99615900 0.31358000  
 1 -11.41433000 -8.45371000 -0.86408900  
 1 -13.18574200 -9.98580200 -0.36957400  
 1 -8.13860200 -5.90704300 -2.03462100  
 1 -9.89599100 -7.44639400 -1.53769600  
 1 -5.13072100 -2.99797000 -2.79729800  
 1 -6.66964500 -4.80329800 -2.55211000  
 1 -2.81060200 0.55946200 -2.88047400  
 1 -4.09393100 -1.44158200 -2.83289100  
 1 -0.80420600 4.29378600 -2.79098000  
 1 -1.89307100 2.18075400 -2.85952600  
 1 0.81075100 8.20588300 -2.46357200  
 1 0.01476800 5.97337200 -2.73188000  
 1 1.48603000 12.30654200 -1.38236200  
 1 1.02682300 10.02227000 -1.91053300  
 1 2.04899700 16.40426800 -0.14575700  
 1 1.60244100 14.11079400 -0.67049200

### 35. [50]clarene

<2,2,20,2,2,22>

E(wB97XD/cc-pVDZ) = -7680.13845823  
 No imaginary frequency (B3LYP/6-31G\*)

6 7.44872700 20.78252400 2.51368000  
 6 6.38739400 21.63048700 2.92821500  
 6 5.07812800 21.15397600 2.81806200  
 6 4.80120600 19.84780900 2.37410700  
 6 5.87893600 18.96069700 2.09589200  
 6 7.17579800 19.46846900 2.15362700  
 6 11.51782900 22.03438400 2.84427400  
 6 10.48452500 22.85773100 3.32468700  
 6 9.13143700 22.51383400 3.16410900  
 6 8.81522700 21.28766000 2.52502700  
 6 9.83312000 20.55473100 1.94018000  
 6 11.17048100 20.89683800 2.07481600  
 6 14.40423800 19.03496600 1.83958900  
 6 13.52521800 20.10124500 2.06508100  
 6 12.19556900 19.99007000 1.57903500  
 6 11.85574800 18.92985700 0.75458300  
 6 12.70224000 17.84190700 0.56308200  
 6 13.98650200 17.86718800 1.17108200  
 6 -8.59345200 -21.16185600 1.38328800  
 6 -9.18711800 -20.05274300 0.72269100  
 6 -10.53831600 -19.79728700 0.93630000  
 6 -11.29511700 -20.54062500 1.82664000  
 6 -10.76076300 -21.73887800 2.37014600  
 6 -9.41354400 -22.03343500 2.12732800  
 6 -12.56452700 -20.02847100 2.32075900  
 6 -12.89187100 -18.69626100 2.11455000  
 6 -14.01335400 -18.11037700 2.67556600  
 6 -14.93818800 -18.92879600 3.37384400  
 6 -14.60026500 -20.27162900 3.61338400  
 6 -13.39366800 -20.82355900 3.14941900  
 6 -13.19896100 -15.82959000 2.14601000  
 6 -13.37595500 -14.45504200 1.99163200  
 6 -14.67042600 -13.91681900 2.23892000  
 6 -15.68077000 -14.75200100 2.74957000  
 6 -15.47047200 -16.11797000 2.95536000  
 6 -14.21998300 -16.67160100 2.57116100  
 6 12.87536400 15.42301400 0.12851000  
 6 12.19408600 16.63272500 -0.05856900  
 6 10.95724200 16.63103100 -0.76165200  
 6 10.34602900 15.46745700 -1.11795900  
 6 10.91024100 14.20677400 -0.77355100  
 6 12.20085000 14.18431700 -0.19398600  
 6 10.72495900 11.75173200 -0.56070400  
 6 10.16923800 12.97849300 -0.96949400  
 6 8.85558800 12.96864000 -1.53205400  
 6 8.15189100 11.81255000 -1.69693000  
 6 8.67490300 10.55291200 -1.27962700  
 6 9.95047300 10.53510600 -0.67530600  
 6 8.43597100 8.12413400 -0.90251900  
 6 7.93156900 9.31964400 -1.44877900  
 6 6.70580100 9.24971600 -2.18150400  
 6 6.06506400 8.06375400 -2.40162300  
 6 6.54161600 6.83713000 -1.84816500  
 6 7.69473600 6.89296200 -1.04003900  
 6 6.30139100 4.42876400 -1.35138000  
 6 5.86872800 5.56858300 -2.05669600  
 6 4.77837500 5.40659800 -2.96508200  
 6 4.17651100 4.19518300 -3.16220700  
 6 4.57247500 3.02705100 -2.44227700  
 6 5.62734200 3.16485700 -1.51762600  
 6 4.32149500 0.65112000 -1.80283600

|   |              |              |             |   |              |              |             |
|---|--------------|--------------|-------------|---|--------------|--------------|-------------|
| 6 | 3.91962300   | 1.73968800   | -2.60150600 | 6 | 0.95937300   | 3.58779900   | -1.37059700 |
| 6 | 2.85318200   | 1.51389300   | -3.52466400 | 6 | 1.41375200   | 2.55142200   | -0.52947600 |
| 6 | 2.21917400   | 0.30645900   | -3.61750300 | 6 | 2.48161700   | 2.86287000   | 0.36709500  |
| 6 | 2.58779500   | -0.80872800  | -2.80445500 | 6 | 4.60669600   | 8.21153300   | 0.65982700  |
| 6 | 3.66445700   | -0.62759000  | -1.91416500 | 6 | 3.86647200   | 9.29741100   | 0.09682100  |
| 6 | 2.29767300   | -3.12282400  | -1.98134300 | 6 | 2.70898500   | 8.98369100   | -0.63849300 |
| 6 | 1.88881300   | -2.08081600  | -2.83663100 | 6 | 2.36121500   | 7.60664100   | -0.89227300 |
| 6 | 0.76198800   | -2.33104700  | -3.67846100 | 6 | 3.02925100   | 6.56372300   | -0.22006700 |
| 6 | 0.07340300   | -3.51066300  | -3.63586700 | 6 | 4.17850900   | 6.91685100   | 0.55405600  |
| 6 | 0.44003800   | -4.57097100  | -2.75128400 | 6 | 5.80477900   | 12.41207700  | 0.99178100  |
| 6 | 1.57236900   | -4.36889400  | -1.93800100 | 6 | 4.83463500   | 13.44522700  | 0.80014700  |
| 6 | 0.13060200   | -6.81667500  | -1.76218300 | 6 | 3.56013200   | 13.07327200  | 0.33426000  |
| 6 | -0.31167000  | -5.80764400  | -2.64125000 | 6 | 3.29519900   | 11.69979900  | -0.02604400 |
| 6 | -1.52234100  | -6.04974100  | -3.36031400 | 6 | 4.22392300   | 10.68865100  | 0.29845500  |
| 6 | -2.24962600  | -7.19356700  | -3.18755900 | 6 | 5.49671500   | 11.09370000  | 0.80310800  |
| 6 | -1.81317200  | -8.24197900  | -2.32006700 | 6 | 6.67076400   | 16.61445500  | 1.65383700  |
| 6 | -0.59371200  | -8.05849300  | -1.64117700 | 6 | 5.61874400   | 17.56992400  | 1.75121900  |
| 6 | -2.00596700  | -10.51614600 | -1.36367700 | 6 | 4.29987400   | 17.14462000  | 1.52857300  |
| 6 | -2.56380900  | -9.46674800  | -2.12156100 | 6 | 4.05193900   | 15.78100800  | 1.11804600  |
| 6 | -3.88566800  | -9.64858500  | -2.62886100 | 6 | 5.10597600   | 14.83767300  | 1.10353000  |
| 6 | -4.59206200  | -10.79468500 | -2.40099400 | 6 | 6.42326200   | 15.30002700  | 1.37988200  |
| 6 | -4.02268700  | -11.90499100 | -1.70320400 | 6 | 3.46397500   | 19.35426100  | 2.19172300  |
| 6 | -2.70940600  | -11.76843200 | -1.21474400 | 6 | 3.23111200   | 18.08745500  | 1.75677500  |
| 6 | -4.08310300  | -14.25574200 | -0.91282100 | 6 | 8.02261600   | 23.32855300  | 3.62579000  |
| 6 | -4.73553900  | -13.15066200 | -1.50127900 | 6 | 6.73317000   | 22.93051300  | 3.47522900  |
| 6 | -6.10669900  | -13.29946400 | -1.86467700 | 6 | 13.85983700  | 21.29641800  | 2.82050000  |
| 6 | -6.77693400  | -14.46856300 | -1.65978200 | 6 | 12.92453600  | 22.22533200  | 3.15032200  |
| 6 | -6.13735600  | -15.61578700 | -1.09715400 | 6 | -6.39865600  | -20.27002900 | 0.79624300  |
| 6 | -4.78010900  | -15.51191400 | -0.73946700 | 6 | -7.15910400  | -21.26813100 | 1.32622800  |
| 6 | -6.21449400  | -17.94431800 | -0.22950900 | 6 | -12.89651000 | -22.13568200 | 3.52401400  |
| 6 | -6.85952700  | -16.84350100 | -0.84095200 | 6 | -11.64407800 | -22.54671500 | 3.19371700  |
| 6 | -8.24308200  | -16.95925200 | -1.15528600 | 6 | -16.44423400 | -17.00220200 | 3.57044800  |
| 6 | -8.97113000  | -18.02850300 | -0.73120700 | 6 | -16.17855200 | -18.31243500 | 3.80675400  |
| 6 | -8.37344300  | -19.07848500 | 0.02006300  | 6 | 14.74938200  | 16.64701100  | 1.14555000  |
| 6 | -6.98146300  | -19.10288600 | 0.17457800  | 6 | 14.20316400  | 15.48349500  | 0.69555600  |
| 6 | -9.90647100  | -13.21729600 | 1.18472900  | 6 | 12.75986400  | 12.91155500  | 0.13188800  |
| 6 | -10.13630100 | -11.86048900 | 0.82100200  | 6 | 12.05351600  | 11.75768500  | -0.03222700 |
| 6 | -11.47201600 | -11.39548100 | 0.79726100  | 6 | 10.43875600  | 9.29614200   | -0.16551300 |
| 6 | -12.54676300 | -12.24147100 | 1.26462600  | 6 | 9.70527000   | 8.15383800   | -0.25029600 |
| 6 | -12.28347900 | -13.58362700 | 1.58014100  | 6 | 8.10428000   | 5.71544900   | -0.35005300 |
| 6 | -10.93889600 | -14.04938900 | 1.51154000  | 6 | 7.42389300   | 4.54737000   | -0.47872100 |
| 6 | -6.67330400  | -10.38947600 | 0.49982700  | 6 | 6.00122800   | 2.03845400   | -0.73043300 |
| 6 | -6.93329000  | -9.10440500  | -0.06626500 | 6 | 5.37224400   | 0.84367100   | -0.85957200 |
| 6 | -8.26040000  | -8.81234900  | -0.44457500 | 6 | 4.08098100   | -1.72662500  | -1.10949400 |
| 6 | -9.33583000  | -9.69941900  | -0.06584400 | 6 | 3.43003700   | -2.91585400  | -1.14206200 |
| 6 | -9.04743600  | -10.96559000 | 0.47600400  | 6 | 1.97021600   | -5.40646200  | -1.04634700 |
| 6 | -7.67525600  | -11.29583300 | 0.70893100  | 6 | 1.29022200   | -6.57805600  | -0.97113100 |
| 6 | -3.70420400  | -7.16716400  | 0.25911200  | 6 | -0.08788500  | -9.12444000  | -0.83932100 |
| 6 | -3.95269000  | -6.00580700  | -0.53728900 | 6 | -0.74716200  | -10.30680400 | -0.72956500 |
| 6 | -5.15704900  | -5.97410200  | -1.26824400 | 6 | -2.09133200  | -12.89698600 | -0.59708400 |
| 6 | -6.17688600  | -6.97012900  | -1.04472000 | 6 | -2.73652600  | -14.08829900 | -0.47441900 |
| 6 | -5.89759200  | -8.10874100  | -0.26698500 | 6 | -4.13958000  | -16.66709200 | -0.19163200 |
| 6 | -4.60808700  | -8.19013200  | 0.34566300  | 6 | -4.81854400  | -17.82493300 | 0.04568500  |
| 6 | -1.10022800  | -3.62367700  | 0.18885700  | 6 | -13.88672200 | -11.74310500 | 1.46194000  |
| 6 | -1.37421700  | -2.52330200  | -0.68093200 | 6 | -14.88285800 | -12.52388600 | 1.95757400  |
| 6 | -2.46261500  | -2.66125000  | -1.56638400 | 6 | -10.70322600 | -9.29697900  | -0.16909900 |
| 6 | -3.31029200  | -3.82790000  | -1.51906400 | 6 | -11.71651700 | -10.08512900 | 0.28436100  |
| 6 | -3.04079500  | -4.87716900  | -0.61776300 | 6 | -7.50356500  | -6.77937200  | -1.53618000 |
| 6 | -1.88253400  | -4.74647000  | 0.20866000  | 6 | -8.50990900  | -7.63177500  | -1.20450100 |
| 6 | 1.14720100   | 0.15011800   | 0.24856000  | 6 | -4.45906500  | -3.92361400  | -2.35954500 |
| 6 | 0.78271700   | 1.24256800   | -0.59750900 | 6 | -5.35567900  | -4.93335600  | -2.22037200 |
| 6 | -0.25550900  | 1.01606200   | -1.52301100 | 6 | -2.00502600  | -0.46500700  | -2.49344700 |
| 6 | -0.94592500  | -0.25003400  | -1.56447900 | 6 | -2.72991600  | -1.61118900  | -2.49148900 |
| 6 | -0.60505200  | -1.28868600  | -0.67461900 | 6 | -0.05030600  | 3.29540600   | -2.33280900 |
| 6 | 0.48813600   | -1.04886700  | 0.21393700  | 6 | -0.62529200  | 2.06952400   | -2.40862700 |
| 6 | 3.02843200   | 4.11560800   | 0.43743500  | 6 | 1.33295100   | 7.27866600   | -1.82208300 |
| 6 | 2.53304700   | 5.20365800   | -0.34458000 | 6 | 0.93852700   | 5.99402300   | -2.01466800 |
| 6 | 1.48767300   | 4.92437100   | -1.24727200 | 6 | 2.10594500   | 11.33658700  | -0.72404500 |

6 1.85366200 10.04426700 -1.06405800  
6 2.75861600 15.34677500 0.69523400  
6 2.53688200 14.06950500 0.27906300  
1 4.24429300 21.80689500 3.08943100  
1 8.00307900 18.80627900 1.91957200  
1 10.73957900 23.76948300 3.87160200  
1 9.57567900 19.64662300 1.40836200  
1 15.41436300 19.07594600 2.25578900  
1 10.85723000 18.89198900 0.33299000  
1 -10.98198900 -18.92235400 0.47399700  
1 -8.96782000 -22.92035400 2.58553700  
1 -12.21757900 -18.07399600 1.53810200  
1 -15.27792300 -20.89219000 4.20596300  
1 -12.22230900 -16.25406300 1.93585900  
1 -16.65215500 -14.31500100 2.99589100  
1 10.48192000 17.57343400 -1.03088700  
1 9.39843500 15.52111300 -1.65007200  
1 8.38488800 13.89998800 -1.84093800  
1 7.15283900 11.87148400 -2.12582600  
1 6.27083700 10.15527400 -2.60171000  
1 5.14069100 8.07396700 -2.97814900  
1 4.41143200 6.26293400 -3.52961800  
1 3.35228800 4.13924400 -3.87229000  
1 2.51180600 2.32504000 -4.16628700  
1 1.39689800 0.21055100 -4.32573000  
1 0.41562600 -1.55787600 -4.36303600  
1 -0.78910400 -3.62666700 -4.29096400  
1 -1.90857600 -5.29262400 -4.04146600  
1 -3.18123500 -7.30139500 -3.74167600  
1 -4.37374700 -8.83887800 -3.17021300  
1 -5.61068600 -10.85485100 -2.78096500  
1 -6.65313900 -12.45677900 -2.28493000  
1 -7.83098100 -14.50533500 -1.92807000  
1 -8.74764000 -16.17911600 -1.72153300  
1 -10.03065500 -18.07138900 -0.98053400  
1 -8.89493500 -13.62208500 1.17469900  
1 -10.70348500 -15.08298600 1.76096400  
1 -5.64839600 -10.68066000 0.73104000  
1 -7.40935500 -12.27363800 1.10847700  
1 -2.75449800 -7.26846200 0.78417900  
1 -4.34681700 -9.06543400 0.94022300  
1 -0.24241000 -3.58195000 0.85926900  
1 -1.61852400 -5.54836500 0.89767900  
1 1.97125800 0.26439400 0.95228800  
1 0.81605000 -1.83628600 0.89179500  
1 3.84856900 4.28335500 1.13528500  
1 2.89311900 2.08462000 1.00888900  
1 5.51569000 8.41377300 1.22638300  
1 4.76615600 6.13511700 1.03577400  
1 6.80668300 12.66172300 1.33860600  
1 6.26440800 10.34439900 0.99785800  
1 7.70185400 16.91365000 1.83606600  
1 7.26461900 14.60883500 1.34155600  
1 2.62537800 20.02319200 2.39661500  
1 2.19827000 17.76739700 1.62513600  
1 8.24422000 24.29421000 4.08592600  
1 5.92095900 23.58114900 3.80735600  
1 14.89776300 21.43722400 3.13077800  
1 13.21689200 23.11244400 3.71685200  
1 -5.31392100 -20.36624400 0.83996800  
1 -6.67611200 -22.13630500 1.77983900  
1 -13.53238100 -22.77492400 4.14078300  
1 -11.27635000 -23.51024200 3.55392500  
1 -17.40092300 -16.57636800 3.88144900  
1 -16.91841700 -18.93552800 4.31435100  
1 15.76043900 16.64852500 1.55849400  
1 14.79837100 14.57280200 0.75949500  
1 13.76246500 12.85075000 0.55325100

1 12.53025200 10.82084400 0.25037300  
1 11.41074300 9.25014600 0.32172800  
1 10.13089900 7.24004700 0.15893300  
1 8.96152700 5.74196300 0.31925300  
1 7.77760600 3.68700200 0.08379100  
1 6.79193100 2.12088800 0.01084700  
1 5.69147000 0.02873300 -0.21521600  
1 4.93897700 -1.63392200 -0.44884100  
1 3.79876900 -3.71475700 -0.50418600  
1 2.83440300 -5.27794100 -0.39990800  
1 1.64017400 -7.32741300 -0.26549300  
1 0.86147900 -9.01927100 -0.31990700  
1 -0.30491000 -11.08841400 -0.11559100  
1 -1.06568800 -12.83058100 -0.24020200  
1 -2.20389300 -14.91769400 -0.01333900  
1 -3.07989200 -16.63573100 0.05514200  
1 -4.27841500 -18.66274200 0.48494200  
1 -14.10361000 -10.69550100 1.25716000  
1 -15.87211100 -12.09748500 2.13705400  
1 -10.95078100 -8.31273800 -0.56328300  
1 -12.73614700 -9.70843200 0.21877800  
1 -7.74507300 -5.90001400 -2.13005800  
1 -9.51542600 -7.41607200 -1.56199400  
1 -4.65905000 -3.16363600 -3.11061500  
1 -6.22868700 -4.94822700 -2.87043100  
1 -2.26621600 0.30010200 -3.21985100  
1 -3.53325200 -1.70620500 -3.21749500  
1 -0.38241200 4.05821000 -3.03260800  
1 -1.39262100 1.91379500 -3.16238300  
1 0.86528400 8.06137900 -2.41661600  
1 0.15787400 5.80470900 -2.74701900  
1 1.39816600 12.10443900 -1.03178400  
1 0.94119300 9.82229400 -1.61406700  
1 1.93008700 16.05294500 0.66752300  
1 1.53453300 13.79939800 -0.04934400

### 36. [50]clarene

<2,4,18,4,2,20>

E(wB97XD/cc-pVDZ) = -7680.10234989  
No imaginary frequency (B3LYP/6-31G\*)

6 7.54025200 21.24409700 -0.42271600  
6 6.86602200 22.49744800 -0.52257000  
6 5.47361500 22.52082400 -0.53212800  
6 4.71202900 21.34751500 -0.44071500  
6 5.37459700 20.09491800 -0.32449500  
6 6.77627300 20.08544800 -0.32179800  
6 11.83897400 21.22903500 -0.45477200  
6 11.11715200 22.42813000 -0.52504900  
6 9.72428400 22.45050600 -0.51885800  
6 9.00943700 21.21952300 -0.43141500  
6 9.73503900 20.03367300 -0.36380900  
6 11.13565400 19.99661700 -0.37529800  
6 16.20642700 13.85446900 -0.15635600  
6 15.49986300 15.05861700 -0.19128100  
6 14.07509900 15.03449500 -0.17327200  
6 13.43393000 13.79445900 -0.12143800  
6 14.12937900 12.58233600 -0.08837100  
6 15.55382500 12.61971500 -0.10675900  
6 -3.15266200 -19.78311000 -0.13552900  
6 -3.83194000 -18.53051600 -0.11596100  
6 -5.22943300 -18.53346500 -0.14697700  
6 -5.98345500 -19.70831400 -0.19761500  
6 -5.29259100 -20.95458900 -0.21725100



|   |              |              |             |   |              |              |             |
|---|--------------|--------------|-------------|---|--------------|--------------|-------------|
| 6 | -3.89640200  | -20.96521500 | -0.18460100 | 6 | -8.17349800  | -18.48512100 | -0.21284000 |
| 6 | -11.75128500 | -19.64091400 | -0.38049500 | 6 | -9.53841300  | -18.46860600 | -0.25515200 |
| 6 | -12.48339100 | -18.44630900 | -0.36575800 | 6 | -10.29415600 | -19.66594300 | -0.32526100 |
| 6 | -13.87342700 | -18.41056600 | -0.42759400 | 6 | -9.60243100  | -20.89521800 | -0.34481000 |
| 6 | -14.58291100 | -19.64479700 | -0.51208100 | 6 | -8.16083400  | -20.91186800 | -0.29716900 |
| 6 | -13.86741300 | -20.84004300 | -0.52151800 | 6 | -12.01147900 | -12.10139700 | 0.01734700  |
| 6 | -12.46778000 | -20.86594800 | -0.45710200 | 6 | -12.73671900 | -10.87730900 | -0.01890600 |
| 6 | -14.00608000 | -15.90962100 | -0.31771600 | 6 | -14.14108400 | -10.93860500 | -0.15335600 |
| 6 | -14.71459100 | -14.70017200 | -0.31605200 | 6 | -14.80784200 | -12.21926500 | -0.24219200 |
| 6 | -16.13134400 | -14.75207200 | -0.42367100 | 6 | -14.05257200 | -13.40629300 | -0.21297500 |
| 6 | -16.76776900 | -15.99795100 | -0.51230900 | 6 | -12.64026800 | -13.30660400 | -0.07919800 |
| 6 | -16.05178100 | -17.19242300 | -0.50750200 | 6 | -10.01113200 | -8.31044500  | 0.31093200  |
| 6 | -14.62874300 | -17.15024500 | -0.41521400 | 6 | -10.72157600 | -7.07549000  | 0.24130100  |
| 6 | 14.03011200  | 17.52167800  | -0.27871800 | 6 | -12.12257800 | -7.12201900  | 0.08998300  |
| 6 | 13.29566300  | 18.76204600  | -0.33136800 | 6 | -12.80286100 | -8.39932300  | 0.01290300  |
| 6 | 11.88522300  | 18.74714900  | -0.31417500 | 6 | -12.06473700 | -9.59783500  | 0.07387500  |
| 6 | 11.22534200  | 17.49460600  | -0.24075700 | 6 | -10.64945000 | -9.50955900  | 0.22791200  |
| 6 | 11.92136300  | 16.32057000  | -0.19385900 | 6 | -7.96939500  | -4.53465800  | 0.54290600  |
| 6 | 13.33857700  | 16.29534400  | -0.21453300 | 6 | -8.66489900  | -3.29303400  | 0.44077600  |
| 6 | 14.19454000  | 10.09838400  | -0.01881600 | 6 | -10.06524100 | -3.32652600  | 0.28179800  |
| 6 | 13.45003400  | 11.29146000  | -0.04057300 | 6 | -10.76002100 | -4.59749000  | 0.22453400  |
| 6 | 12.03150500  | 11.20382400  | -0.01684500 | 6 | -10.03597100 | -5.80341400  | 0.31628000  |
| 6 | 11.38638100  | 10.00344000  | 0.02144200  | 6 | -8.62077900  | -5.72780300  | 0.48115300  |
| 6 | 12.10144300  | 8.77376000   | 0.03821000  | 6 | -5.88352800  | -0.77838400  | 0.68963100  |
| 6 | 13.51288900  | 8.82385200   | 0.01920400  | 6 | -6.56428500  | 0.46867200   | 0.55806100  |
| 6 | 12.14478900  | 6.29530100   | 0.08241100  | 6 | -7.96507800  | 0.44809100   | 0.40114900  |
| 6 | 11.41371400  | 7.49944500   | 0.07109700  | 6 | -8.67446800  | -0.81571600  | 0.37020200  |
| 6 | 9.98963000   | 7.42246800   | 0.09042700  | 6 | -7.96473000  | -2.02774200  | 0.49030100  |
| 6 | 9.33688000   | 6.22847200   | 0.11565600  | 6 | -6.54894100  | -1.96487600  | 0.65594100  |
| 6 | 10.04105800  | 4.98810600   | 0.12346000  | 6 | -3.75172000  | 2.95451500   | 0.73324100  |
| 6 | 11.45047500  | 5.02359300   | 0.10823500  | 6 | -4.41850200  | 4.20644500   | 0.57843700  |
| 6 | 10.06180400  | 2.50990900   | 0.14797400  | 6 | -5.82071100  | 4.19945200   | 0.43333400  |
| 6 | 9.34158400   | 3.72154300   | 0.14382400  | 6 | -6.54502600  | 2.94375900   | 0.43279400  |
| 6 | 7.91634500   | 3.65746200   | 0.15782900  | 6 | -5.84901800  | 1.72630500   | 0.57620300  |
| 6 | 7.25271400   | 2.46958300   | 0.17171800  | 6 | -4.43157700  | 1.77577600   | 0.73193900  |
| 6 | 7.94544000   | 1.22224900   | 0.17281100  | 6 | -1.57409600  | 6.66028600   | 0.66673100  |
| 6 | 9.35496800   | 1.24440900   | 0.16246100  | 6 | -2.22793500  | 7.91718600   | 0.49777700  |
| 6 | 7.94294900   | -1.25611000  | 0.18042500  | 6 | -3.63207000  | 7.92482700   | 0.37287000  |
| 6 | 7.23407000   | -0.03768200  | 0.18189200  | 6 | -4.37112300  | 6.67812300   | 0.40338700  |
| 6 | 5.80820600   | -0.08859200  | 0.19021200  | 6 | -3.68802500  | 5.45530700   | 0.56243400  |
| 6 | 5.13353500   | -1.27028400  | 0.19375400  | 6 | -2.26813900  | 5.49029200   | 0.69849200  |
| 6 | 5.81460100   | -2.52407600  | 0.18931600  | 6 | 0.64714600   | 10.33639900  | 0.49666900  |
| 6 | 7.22427800   | -2.51504600  | 0.18418800  | 6 | 0.00530100   | 11.59897500  | 0.32457600  |
| 6 | 5.78905000   | -5.00228300  | 0.18122500  | 6 | -1.40066100  | 11.62242500  | 0.22602700  |
| 6 | 5.09149100   | -3.77731500  | 0.18777700  | 6 | -2.15381600  | 10.38520300  | 0.28416000  |
| 6 | 3.66519700   | -3.81496000  | 0.19054100  | 6 | -1.48278000  | 9.15647200   | 0.44910900  |
| 6 | 2.97961000   | -4.99031700  | 0.18406800  | 6 | -0.06029800  | 9.17564900   | 0.55809100  |
| 6 | 3.64901400   | -6.25031800  | 0.17424600  | 6 | 2.90835100   | 13.98288800  | 0.24127400  |
| 6 | 5.05870900   | -6.25447900  | 0.17445400  | 6 | 2.27791500   | 15.25190800  | 0.07774300  |
| 6 | 3.60013400   | -8.72806900  | 0.15060800  | 6 | 0.87123500   | 15.29175600  | 0.00950700  |
| 6 | 2.91412600   | -7.49659800  | 0.16206400  | 6 | 0.10477400   | 14.06436200  | 0.08864300  |
| 6 | 1.48757300   | -7.52061400  | 0.15897900  | 6 | 0.76428000   | 12.82853600  | 0.24863800  |
| 6 | 0.79096200   | -8.68937000  | 0.14226000  | 6 | 2.18860600   | 12.83096200  | 0.32580800  |
| 6 | 1.44850200   | -9.95547200  | 0.12716600  | 6 | 5.20321400   | 17.60318700  | -0.07400700 |
| 6 | 2.85798900   | -9.97315800  | 0.13320700  | 6 | 4.58430500   | 18.87548500  | -0.21780100 |
| 6 | 1.37577300   | -12.43276100 | 0.08807600  | 6 | 3.17885700   | 18.93629500  | -0.25341400 |
| 6 | 0.70163200   | -11.19454600 | 0.10397100  | 6 | 2.40243000   | 17.71921800  | -0.16166700 |
| 6 | -0.72464100  | -11.20468500 | 0.09409800  | 6 | 3.05060500   | 16.47294600  | -0.01758100 |
| 6 | -1.43225700  | -12.36689500 | 0.06666600  | 6 | 4.47314600   | 16.45677700  | 0.02553500  |
| 6 | -0.78672500  | -13.63859700 | 0.04689300  | 6 | 3.27761500   | 21.37100100  | -0.46256200 |
| 6 | 0.62165600   | -13.66987800 | 0.05980900  | 6 | 2.55183100   | 20.22723900  | -0.37889400 |
| 6 | -0.88446700  | -16.11861400 | -0.00728500 | 6 | 8.99061300   | 23.69584700  | -0.60578900 |
| 6 | -1.54657400  | -14.87111500 | 0.01216600  | 6 | 7.64037700   | 23.7172400   | -0.61187200 |
| 6 | -2.96905100  | -14.86607200 | -0.00574100 | 6 | 16.16859900  | 16.32964300  | -0.24901000 |
| 6 | -3.68636200  | -16.02469100 | -0.04468900 | 6 | 15.47385100  | 17.49244800  | -0.29176900 |
| 6 | -3.05320400  | -17.29711800 | -0.06838300 | 6 | -1.00516100  | -18.63720300 | -0.06607200 |
| 6 | -1.64774900  | -17.34592300 | -0.04666400 | 6 | -1.71648300  | -19.79085900 | -0.10711900 |
| 6 | -7.44371000  | -19.70019300 | -0.23524500 | 6 | -11.73053500 | -22.09776400 | -0.47068000 |

|   |              |              |             |   |              |              |             |
|---|--------------|--------------|-------------|---|--------------|--------------|-------------|
| 6 | -10.37521200 | -22.11104100 | -0.41695400 | 1 | -2.51835400  | -12.30425200 | 0.05942600  |
| 6 | -16.72229200 | -18.47290300 | -0.59408100 | 1 | -3.51548400  | -13.92550800 | 0.01013700  |
| 6 | -16.02861800 | -19.63154400 | -0.59213900 | 1 | -4.77236900  | -15.95413200 | -0.05744200 |
| 6 | 13.96296700  | 20.03866500  | -0.40653200 | 1 | -7.65084300  | -17.53194800 | -0.16084400 |
| 6 | 13.27440800  | 21.20587600  | -0.46546100 | 1 | -10.04004100 | -17.50299000 | -0.23562800 |
| 6 | 16.27809000  | 11.37957700  | -0.07712300 | 1 | -10.92844100 | -12.09531500 | 0.11964300  |
| 6 | 15.63416600  | 10.18698100  | -0.03680500 | 1 | -12.02960600 | -14.20695300 | -0.04679700 |
| 6 | 14.21965100  | 7.58099400   | 0.03588700  | 1 | -8.92964100  | -8.31413600  | 0.42893800  |
| 6 | 13.57107000  | 6.38284800   | 0.06532100  | 1 | -10.04740400 | -10.41386300 | 0.28549200  |
| 6 | 12.14717200  | 3.77712500   | 0.11658100  | 1 | -6.88900000  | -4.54814900  | 0.66982400  |
| 6 | 11.48779800  | 2.58367400   | 0.13527000  | 1 | -8.02977300  | -6.63749000  | 0.56316300  |
| 6 | 10.03996400  | -0.00834900  | 0.16449400  | 1 | -4.80345500  | -0.80148900  | 0.81796400  |
| 6 | 9.36944000   | -1.19575200  | 0.17299600  | 1 | -5.96874300  | -2.87926000  | 0.75996100  |
| 6 | 7.89760700   | -3.77410200  | 0.18073700  | 1 | -2.67113500  | 2.92132400   | 0.85491600  |
| 6 | 7.21603500   | -4.95522800  | 0.17935400  | 1 | -3.86177700  | 0.85693900   | 0.85290200  |
| 6 | 5.72018300   | -7.51981000  | 0.16570800  | 1 | -0.49240100  | 6.61616100   | 0.77425300  |
| 6 | 5.02752400   | -8.69443000  | 0.15447400  | 1 | -1.70791600  | 4.56692500   | 0.82931300  |
| 6 | 3.50731200   | -11.24489400 | 0.11954500  | 1 | 1.73009500   | 10.28041900  | 0.58422000  |
| 6 | 2.80358200   | -12.41271600 | 0.09833800  | 1 | 0.49101600   | 8.24715500   | 0.69049600  |
| 6 | 1.25880000   | -14.94895100 | 0.04203900  | 1 | 3.99222400   | 13.91416400  | 0.30503300  |
| 6 | 0.54526300   | -16.10955800 | 0.01070300  | 1 | 2.73159400   | 11.89659600  | 0.45110900  |
| 6 | -7.41423400  | -22.14792900 | -0.31278200 | 1 | 6.28807900   | 17.52448000  | -0.03582000 |
| 6 | -6.05972000  | -22.16881800 | -0.27367500 | 1 | 5.00862300   | 15.51626000  | 0.13563800  |
| 6 | -16.24017100 | -12.32120100 | -0.35840900 | 1 | 2.77260900   | 22.33509000  | -0.55166900 |
| 6 | -16.86861000 | -13.52136600 | -0.43965600 | 1 | 1.46593500   | 20.29969600  | -0.40271500 |
| 6 | -14.22145500 | -8.49816800  | -0.12644600 | 1 | 9.56020900   | 24.62532300  | -0.67138900 |
| 6 | -14.85639400 | -9.70181300  | -0.20124600 | 1 | 7.10175900   | 24.66508700  | -0.68294800 |
| 6 | -12.17731100 | -4.68239700  | 0.07273800  | 1 | 17.26045500  | 16.34322300  | -0.26013300 |
| 6 | -12.82466700 | -5.88103000  | 0.01200000  | 1 | 16.03166600  | 18.42590000  | -0.33643200 |
| 6 | -10.09197700 | -0.88740800  | 0.21499100  | 1 | 0.08146900   | -18.69897200 | -0.04728500 |
| 6 | -10.75268100 | -2.07965500  | 0.17518200  | 1 | -1.20022000  | -20.75299600 | -0.12080500 |
| 6 | -7.96379500  | 2.88542200   | 0.28375700  | 1 | -12.28519700 | -23.03672500 | -0.52702500 |
| 6 | -8.63827100  | 1.70033300   | 0.26968900  | 1 | -9.86756900  | -23.07362000 | -0.43168100 |
| 6 | -5.79191500  | 6.63395300   | 0.26953600  | 1 | -17.81239000 | -18.47972500 | -0.65972700 |
| 6 | -6.48027800  | 5.45686400   | 0.28336100  | 1 | -16.54942700 | -20.58935000 | -0.65575100 |
| 6 | -3.57692900  | 10.35618800  | 0.17246800  | 1 | 15.05048900  | 20.07951500  | -0.41951800 |
| 6 | -4.27878300  | 9.18768500   | 0.21283600  | 1 | 13.81074700  | 22.15528900  | -0.52405900 |
| 6 | -1.32060400  | 14.05137700  | 0.00391500  | 1 | 17.36947500  | 11.41319200  | -0.08961300 |
| 6 | -2.03517900  | 12.89161400  | 0.06615100  | 1 | 16.23074800  | 9.27670800   | -0.01728100 |
| 6 | 0.97390100   | 17.72030200  | -0.21640700 | 1 | 15.30801500  | 7.57302100   | 0.02333400  |
| 6 | 0.24842100   | 16.56909200  | -0.13937500 | 1 | 14.17193500  | 5.47505400   | 0.07515600  |
| 1 | 4.95779400   | 23.48102000  | -0.61457500 | 1 | 13.23569600  | 3.76168100   | 0.10682600  |
| 1 | 7.28860500   | 19.13170000  | -0.23995900 | 1 | 12.08044100  | 1.67047900   | 0.13961600  |
| 1 | 11.66451300  | 23.37204400  | -0.59022900 | 1 | 11.12833300  | -0.03380400  | 0.15829900  |
| 1 | 9.19113500   | 19.09588900  | -0.30447200 | 1 | 9.95351300   | -2.11445700  | 0.17318700  |
| 1 | 17.29911000  | 13.87821100  | -0.17106200 | 1 | 8.98571200   | -3.80963300  | 0.17833000  |
| 1 | 12.34898500  | 13.77067000  | -0.11060900 | 1 | 7.79138200   | -5.87943400  | 0.17591500  |
| 1 | -5.75052600  | -17.58155700 | -0.13481400 | 1 | 6.80790200   | -7.56563100  | 0.16713400  |
| 1 | -3.37115400  | -21.92365600 | -0.20026800 | 1 | 5.59402100   | -9.62408800  | 0.14748100  |
| 1 | -11.94309700 | -17.50632200 | -0.30804500 | 1 | 4.59451700   | -11.30123100 | 0.12526000  |
| 1 | -14.41167600 | -21.78590600 | -0.58435300 | 1 | 3.36127700   | -13.34764600 | 0.08810900  |
| 1 | -12.92341200 | -15.87728200 | -0.24198300 | 1 | 2.34539700   | -15.01554700 | 0.05294900  |
| 1 | -17.85769900 | -16.03079500 | -0.58851600 | 1 | 1.09614400   | -17.04825000 | -0.00203300 |
| 1 | 10.13819900  | 17.44723500  | -0.22236400 | 1 | -7.94437300  | -23.09744200 | -0.35647800 |
| 1 | 11.35651800  | 15.39190300  | -0.13966600 | 1 | -5.52599800  | -23.12141000 | -0.28652300 |
| 1 | 11.42728500  | 12.10896500  | -0.02880200 | 1 | -16.84582400 | -11.41685700 | -0.37704600 |
| 1 | 10.29864400  | 10.00718800  | 0.03759400  | 1 | -17.95659300 | -13.56566000 | -0.52188800 |
| 1 | 9.39196800   | 8.33149300   | 0.08461100  | 1 | -14.82765900 | -7.59505200  | -0.17305200 |
| 1 | 8.24913200   | 6.24087500   | 0.12872100  | 1 | -15.93987000 | -9.70292300  | -0.30556900 |
| 1 | 7.32744400   | 4.57222500   | 0.15671300  | 1 | -12.77288000 | -3.77373300  | 0.00325800  |
| 1 | 6.16508000   | 2.49180600   | 0.18107300  | 1 | -13.90709300 | -5.87415900  | -0.10420400 |
| 1 | 5.22783900   | 0.83159600   | 0.19287100  | 1 | -10.67682800 | 0.02628800   | 0.12410300  |
| 1 | 4.04611000   | -1.23809900  | 0.19912400  | 1 | -11.83442300 | -2.06294800  | 0.05369600  |
| 1 | 3.09326200   | -2.88954700  | 0.19692500  | 1 | -8.53828400  | 3.80373900   | 0.17516800  |
| 1 | 1.89250600   | -4.94820600  | 0.18562700  | 1 | -9.72004800  | 1.72705900   | 0.15028000  |
| 1 | 0.92442600   | -6.58985000  | 0.16899900  | 1 | -6.35649200  | 7.55692100   | 0.14893800  |
| 1 | -0.29570400  | -8.63715500  | 0.13980500  | 1 | -7.56272800  | 5.49424900   | 0.17324100  |
| 1 | -1.27887100  | -10.26860100 | 0.10728000  | 1 | -4.13224700  | 11.28409700  | 0.04682600  |

1 -5.36221200 9.23653200 0.11792400  
 1 -1.86730200 14.98476400 -0.11885500  
 1 -3.11954300 12.95259700 -0.00908000  
 1 0.43391200 18.65877000 -0.32820700  
 1 -0.83654500 16.64234500 -0.19200600

### 37. [52]clarene

<2,2,22,2,2,22>

E(wB97XD/cc-pVDZ) = -7987.35542836  
 No imaginary frequency (B3LYP/6-31G\*)

6 9.92989300 21.94380400 0.48024900  
 6 9.05661100 23.02602200 0.76960100  
 6 7.68275700 22.77384600 0.81730000  
 6 7.16211800 21.47689800 0.65392200  
 6 8.05481000 20.38010400 0.49376300  
 6 9.41691300 20.65585900 0.38750400  
 6 14.16468400 22.48055500 0.47522400  
 6 13.31759200 23.55433000 0.80000000  
 6 11.91886600 23.43622800 0.73789900  
 6 11.36060000 22.19022300 0.35360200  
 6 12.20331500 21.18846600 -0.09600600  
 6 13.58523700 21.29742300 -0.04622500  
 6 16.42362900 18.86698400 0.08550000  
 6 15.75841500 20.09879200 0.08811300  
 6 14.40816300 20.13516200 -0.35072400  
 6 13.84640100 19.00571100 -0.92457700  
 6 14.47711900 17.76545400 -0.88745000  
 6 15.77480400 17.68232500 -0.31395500  
 6 -7.16212500 -21.47697900 -0.65288400  
 6 -8.05481500 -20.38015900 -0.49289300  
 6 -9.41693300 -20.65588800 -0.38672200  
 6 -9.92992600 -21.94383300 -0.47942200  
 6 -9.05662700 -23.02608600 -0.76859800  
 6 -7.68276700 -22.77393400 -0.81618300  
 6 -11.36065800 -22.19022300 -0.35295500  
 6 -12.20343500 -21.18842200 0.09644400  
 6 -13.58535400 -21.29735400 0.04642000  
 6 -14.16472900 -22.48052200 -0.47503100  
 6 -13.31759900 -23.55433300 -0.79957700  
 6 -11.91888400 -23.43624700 -0.73725600  
 6 -13.84664000 -19.00552500 0.92445000  
 6 -14.47734100 -17.76526600 0.88705300  
 6 -15.77493200 -17.68219700 0.31333700  
 6 -16.42370100 -18.86689800 -0.08607300  
 6 -15.75849600 -20.09871200 -0.08842400  
 6 -14.40831800 -20.13504600 0.35064900  
 6 14.20605100 15.31759800 -0.80176600  
 6 13.73592200 16.56541400 -1.23181600  
 6 12.48508300 16.64022900 -1.90552400  
 6 11.67002800 15.55409500 -2.01169800  
 6 12.02629200 14.30813300 -1.42260300  
 6 13.31529000 14.17884300 -0.85349600  
 6 11.43690000 12.01501300 -0.71375900  
 6 11.08416200 13.20987300 -1.36867000  
 6 9.77539800 13.30609400 -1.93422800  
 6 8.88801700 12.27265400 -1.87524100  
 6 9.20352300 11.05292200 -1.20640400  
 6 10.46836200 10.94752600 -0.58867000  
 6 8.58451300 8.81072800 -0.37503500  
 6 8.26897900 9.94590700 -1.14579700  
 6 7.03881700 9.93243700 -1.87437100  
 6 6.22144200 8.83846400 -1.88721100  
 6 6.51234500 7.67204000 -1.11711000

6 7.66570700 7.69897200 -0.30769600  
 6 5.94952100 5.42561900 -0.25142100  
 6 5.66303600 6.49521800 -1.12264300  
 6 4.53875900 6.35215300 -1.99161300  
 6 3.78360700 5.21273300 -2.01506200  
 6 4.05508000 4.10659500 -1.15405300  
 6 5.12944600 4.23961600 -0.25186300  
 6 3.55875000 1.86252800 -0.23764800  
 6 3.26758700 2.88530800 -1.16205600  
 6 2.18891800 2.65630300 -2.06921900  
 6 1.46532100 1.49537500 -2.05677300  
 6 1.74022600 0.43848800 -1.13658200  
 6 2.79561300 0.63977900 -0.22523100  
 6 1.31410000 -1.79346100 -0.15280000  
 6 0.98450000 -0.80359800 -1.10058300  
 6 -0.10166800 -1.08471700 -1.98347300  
 6 -0.80107400 -2.25934100 -1.92240300  
 6 -0.48161600 -3.28588300 -0.98272300  
 6 0.58824900 -3.03765800 -0.10020800  
 6 -0.77850700 -5.53477000 0.00784100  
 6 -1.19900600 -4.54877300 -0.90753800  
 6 -2.33702800 -4.85252900 -1.71468600  
 6 -3.00349800 -6.04314700 -1.60890500  
 6 -2.56046900 -7.08335500 -0.73673100  
 6 -1.41760400 -6.82655400 0.04600800  
 6 -2.59615600 -9.41565900 0.07930100  
 6 -3.21122100 -8.37937800 -0.65140100  
 6 -4.47313900 -8.66458500 -1.25897800  
 6 -5.06888900 -9.88969200 -1.14011300  
 6 -4.41422600 -10.98560500 -0.49745600  
 6 -3.14336300 -10.75057300 0.05923800  
 6 -4.17247700 -13.40436000 -0.03558700  
 6 -4.98092200 -12.31951700 -0.43572200  
 6 -6.34886900 -12.58770900 -0.74325200  
 6 -6.86449200 -13.85108000 -0.66834900  
 6 -6.04079400 -14.98339200 -0.37876100  
 6 -4.67841900 -14.75562400 -0.10935000  
 6 -5.66306700 -17.43802500 -0.29705100  
 6 -6.55185600 -16.34100400 -0.38483000  
 6 -7.94650400 -16.61281800 -0.46356700  
 6 -8.42150400 -17.89242800 -0.45844000  
 6 -7.54651400 -19.01631700 -0.44274400  
 6 -6.16163200 -18.79104400 -0.40221800  
 6 -11.67037900 -15.55377900 2.01138000  
 6 -12.02651500 -14.30791700 1.42199600  
 6 -13.31542000 -14.17869600 0.85266300  
 6 -14.20620800 -15.31743100 0.80101400  
 6 -13.73617600 -16.56518400 1.23135200  
 6 -12.48544700 -16.63991100 1.90527200  
 6 -8.88825700 -12.27244000 1.87473300  
 6 -9.20361400 -11.05283800 1.20558600  
 6 -10.46833900 -10.94753800 0.58760500  
 6 -11.43693000 -12.01496800 0.71275800  
 6 -11.08434200 -13.20969800 1.36798800  
 6 -9.77567800 -13.30584000 1.93378800  
 6 -6.22164100 -8.83829700 1.88654100  
 6 -6.51239000 -7.67200900 1.11617900  
 6 -7.66559200 -7.69907500 0.30654200  
 6 -8.58441200 -8.81081600 0.37389200  
 6 -8.26904000 -9.94585500 1.14492900  
 6 -7.03902000 -9.93226600 1.87373800  
 6 -3.78377100 -5.21262300 2.01421500  
 6 -4.05514200 -4.10656600 1.15307400  
 6 -5.12938600 -4.23967000 0.25075300  
 6 -5.94942800 -5.42569800 0.25028300  
 6 -5.66308100 -6.49519200 1.12168400  
 6 -4.53892600 -6.35203900 1.99079300  
 6 -1.46546400 -1.49532700 2.05590800

|   |              |              |             |   |              |              |             |
|---|--------------|--------------|-------------|---|--------------|--------------|-------------|
| 6 | -1.74030300  | -0.43846700  | 1.13567000  | 6 | -16.31133400 | -16.36615500 | 0.08657900  |
| 6 | -2.79565000  | -0.63975600  | 0.22427300  | 6 | -12.76211800 | -11.90060600 | 0.18850700  |
| 6 | -3.55873900  | -1.86253700  | 0.23661400  | 6 | -13.65990000 | -12.92280500 | 0.26714600  |
| 6 | -3.26766300  | -2.88527500  | 1.16109700  | 6 | -9.84555200  | -8.76852000  | -0.29344900 |
| 6 | -2.18908700  | -2.65623500  | 2.06835800  | 6 | -10.75323200 | -9.77417300  | -0.17101700 |
| 6 | 0.80104600   | 2.25927700   | 1.92156500  | 6 | -7.07213400  | -5.53638000  | -0.62298200 |
| 6 | 0.48163100   | 3.28583900   | 0.98189500  | 6 | -7.90184600  | -6.61091900  | -0.58248500 |
| 6 | -0.58824300  | 3.03767200   | 0.09937100  | 6 | -4.62378800  | -2.06049700  | -0.69012200 |
| 6 | -1.31413300  | 1.79349500   | 0.15193500  | 6 | -5.37962100  | -3.18683400  | -0.67545600 |
| 6 | -0.98455900  | 0.80360500   | 1.09970000  | 6 | -2.38291700  | 1.54169100   | -0.75701100 |
| 6 | 0.10160300   | 1.08467700   | 1.98261000  | 6 | -3.08974200  | 0.38536100   | -0.72056200 |
| 6 | 3.00363000   | 6.04296700   | 1.60815700  | 6 | -0.29059900  | 5.23032800   | -0.90072700 |
| 6 | 2.56061700   | 7.08323700   | 0.73604900  | 6 | -0.93422600  | 4.03747800   | -0.85616200 |
| 6 | 1.41775100   | 6.82650400   | -0.04671000 | 6 | 1.43130100   | 9.12022100   | -0.84572100 |
| 6 | 0.77861200   | 5.53473800   | -0.00860600 | 6 | 0.89085600   | 7.87462700   | -0.85832100 |
| 6 | 1.19907700   | 4.54869400   | 0.90673700  | 6 | 2.86246100   | 13.13257900  | -0.45812700 |
| 6 | 2.33712500   | 4.85236500   | 1.71387900  | 6 | 2.39195900   | 11.86001000  | -0.55117200 |
| 6 | 5.06902700   | 9.88953500   | 1.13971400  | 6 | 4.27830000   | 17.16077200  | 0.08424400  |
| 6 | 4.41437600   | 10.98550400  | 0.49713900  | 6 | 3.81797900   | 15.88600400  | -0.04604300 |
| 6 | 3.14353500   | 10.75051400  | -0.05962400 | 1 | 6.99107400   | 23.60080400  | 0.99884600  |
| 6 | 2.59633300   | 9.41560000   | -0.07981500 | 1 | 10.10345800  | 19.82778600  | 0.24720500  |
| 6 | 3.21138000   | 8.37925900   | 0.65081700  | 1 | 13.75632700  | 24.49163900  | 1.15274800  |
| 6 | 4.47328100   | 8.66441400   | 1.25845100  | 1 | 11.76300600  | 20.25900700  | -0.43604900 |
| 6 | 6.86460200   | 13.85098900  | 0.66841400  | 1 | 17.44409400  | 18.80837100  | 0.47340700  |
| 6 | 6.04088500   | 14.98332600  | 0.37897300  | 1 | 12.83681700  | 19.06289500  | -1.31669600 |
| 6 | 4.67851900   | 14.75557000  | 0.10951200  | 1 | -10.10347600 | -19.82778900 | -0.24656000 |
| 6 | 4.17261100   | 13.40430400  | 0.03554100  | 1 | -6.99108000  | -23.60091600 | -0.99760000 |
| 6 | 4.98106300   | 12.31942500  | 0.43556400  | 1 | -11.76316800 | -20.25894900 | 0.43650700  |
| 6 | 6.34900100   | 12.58760000  | 0.74314800  | 1 | -13.75628900 | -24.49166500 | -1.15232000 |
| 6 | 8.42154100   | 17.89238900  | 0.45901600  | 1 | -12.83711500 | -19.06265600 | 1.31672800  |
| 6 | 7.54652800   | 19.01626300  | 0.44349100  | 1 | -17.44409900 | -18.80832800 | -0.47416200 |
| 6 | 6.16165000   | 18.79097400  | 0.40298200  | 1 | 12.16453200  | 17.57830100  | -2.35706400 |
| 6 | 5.66310800   | 17.43796100  | 0.29763000  | 1 | 10.72243700  | 15.66654800  | -2.53458900 |
| 6 | 6.55192100   | 16.34094500  | 0.38523600  | 1 | 9.45973600   | 14.22060100  | -2.43263900 |
| 6 | 7.94656600   | 16.61277100  | 0.46398400  | 1 | 7.90572600   | 12.40823800  | -2.32474100 |
| 6 | 5.75253400   | 21.19773100  | 0.65457800  | 1 | 6.74503300   | 10.80077400  | -2.46204400 |
| 6 | 5.28229600   | 19.93112800  | 0.50366700  | 1 | 5.30639100   | 8.88392700   | -2.47640800 |
| 6 | 10.99579900  | 24.50714600  | 1.06550100  | 1 | 4.26755300   | 7.16407600   | -2.66516600 |
| 6 | 9.65085200   | 24.32299900  | 1.04033100  | 1 | 2.93995600   | 5.16757000   | -2.70287300 |
| 6 | 16.33614200  | 21.34004100  | 0.57391600  | 1 | 1.91784600   | 3.42414700   | -2.79264000 |
| 6 | 15.59626800  | 22.47033300  | 0.71764400  | 1 | 0.64794600   | 1.39068700   | -2.76979300 |
| 6 | -5.28229000  | -19.93122200 | -0.50271600 | 1 | -0.40267400  | -0.34437800  | -2.72357200 |
| 6 | -5.75253700  | -21.19783600 | -0.65349000 | 1 | -1.62699400  | -2.40391900  | -2.61850400 |
| 6 | -10.99579100 | -24.50720600 | -1.06464300 | 1 | -2.71818300  | -4.10911900  | -2.41387200 |
| 6 | -9.65084700  | -24.32307600 | -1.03930300 | 1 | -3.88270100  | -6.20218000  | -2.23312200 |
| 6 | -16.33615700 | -21.34000100 | -0.57419700 | 1 | -5.01289200  | -7.87377000  | -1.78074400 |
| 6 | -15.59627000 | -22.47031100 | -0.71769600 | 1 | -6.05700200  | -10.03094500 | -1.57814300 |
| 6 | 16.31126000  | 16.36625800  | -0.08747400 | 1 | -7.01858400  | -11.76507300 | -0.99496900 |
| 6 | 15.54971100  | 15.25309400  | -0.27424900 | 1 | -7.92583900  | -13.98461300 | -0.87301200 |
| 6 | 13.65990900  | 12.92283900  | -0.26830500 | 1 | -8.66298100  | -15.79286000 | -0.49834100 |
| 6 | 12.76218000  | 11.90058700  | -0.18975200 | 1 | -9.49991600  | -18.03617500 | -0.50214900 |
| 6 | 10.75342800  | 9.77400600   | 0.16964400  | 1 | -10.72286900 | -15.66616500 | 2.53443100  |
| 6 | 9.84578700   | 8.76831300   | 0.29204700  | 1 | -12.16499000 | -17.57791400 | 2.35702400  |
| 6 | 7.90214000   | 6.61067200   | 0.58110700  | 1 | -7.90604300  | -12.40795800 | 2.32442300  |
| 6 | 7.07241100   | 5.53615000   | 0.62162600  | 1 | -9.46012900  | -14.22025100 | 2.43244800  |
| 6 | 5.37979200   | 3.18672100   | 0.67424600  | 1 | -5.30672700  | -8.88365200  | 2.47595800  |
| 6 | 4.62393600   | 2.06040300   | 0.68894900  | 1 | -6.74536900  | -10.80049400 | 2.46163800  |
| 6 | 3.08968200   | -0.38528500  | 0.71966800  | 1 | -2.94020000  | -5.16739500  | 2.70212200  |
| 6 | 2.38285400   | -1.54160900  | 0.75616400  | 1 | -4.26779700  | -7.16389700  | 2.66445600  |
| 6 | 0.93427600   | -4.03742400  | 0.85535000  | 1 | -0.64815100  | -1.39061000  | 2.76899600  |
| 6 | 0.29069000   | -5.23029200  | 0.89995500  | 1 | -1.91810700  | -3.42403900  | 2.79185600  |
| 6 | -0.89068500  | -7.87461800  | 0.85768300  | 1 | 1.62695700   | 2.40382500   | 2.61768500  |
| 6 | -1.43111900  | -9.12021700  | 0.84517500  | 1 | 0.40256700   | 0.34432200   | 2.72271200  |
| 6 | -2.39177100  | -11.86002700 | 0.55086000  | 1 | 3.88285000   | 6.20193200   | 2.23236600  |
| 6 | -2.86229700  | -13.13259900 | 0.45798400  | 1 | 2.71827900   | 4.10889800   | 2.41300800  |
| 6 | -3.81790400  | -15.88605400 | 0.04637400  | 1 | 6.05711700   | 10.03075800  | 1.57780300  |
| 6 | -4.27825300  | -17.16083200 | -0.08370500 | 1 | 5.01301800   | 7.87356200   | 1.78017400  |
| 6 | -15.54979000 | -15.25297900 | 0.27329200  | 1 | 7.92594400   | 13.98451600  | 0.87310800  |

|   |              |              |             |   |              |              |             |
|---|--------------|--------------|-------------|---|--------------|--------------|-------------|
| 1 | 7.01872900   | 11.76494300  | 0.99476100  | 6 | 11.07095300  | 24.56605700  | -1.83712200 |
| 1 | 9.49995000   | 18.03615500  | 0.50271300  | 6 | 11.65803900  | 23.46845700  | -1.15158800 |
| 1 | 8.66306000   | 15.79282100  | 0.49861600  | 6 | 13.02182600  | 23.23999300  | -1.30910100 |
| 1 | 5.05322000   | 22.02865000  | 0.76970000  | 6 | 17.51526800  | 22.43888600  | -3.60022800 |
| 1 | 4.20405900   | 19.77709500  | 0.50410000  | 6 | 17.16401600  | 23.77575300  | -3.85321200 |
| 1 | 11.40676500  | 25.48623200  | 1.32202300  | 6 | 15.93702900  | 24.31096800  | -3.42424800 |
| 1 | 8.98338100   | 25.15689900  | 1.26925700  | 6 | 15.09781100  | 23.50763200  | -2.61356600 |
| 1 | 17.39676900  | 21.34805000  | 0.83540400  | 6 | 15.44485800  | 22.18412200  | -2.38521400 |
| 1 | 16.06704600  | 23.38446400  | 1.08656800  | 6 | 16.58737100  | 21.61167000  | -2.91685700 |
| 1 | -4.20405100  | -19.77720300 | -0.50312500 | 6 | 18.27897500  | 18.26379900  | -2.98728800 |
| 1 | -5.05323100  | -22.02877900 | -0.76847900 | 6 | 18.06558600  | 19.63136300  | -3.18011700 |
| 1 | -11.40673800 | -25.48630500 | -1.32114800 | 6 | 16.80680800  | 20.17500100  | -2.80907600 |
| 1 | -8.98335400  | -25.15700100 | -1.26807800 | 6 | 15.78590000  | 19.32415500  | -2.40270800 |
| 1 | -17.39674100 | -21.34802300 | -0.83586000 | 6 | 15.96606900  | 17.94882400  | -2.26261600 |
| 1 | -16.06699500 | -23.38447200 | -1.08661200 | 6 | 17.26454600  | 17.41765100  | -2.50306800 |
| 1 | 17.32626000  | 16.27098200  | 0.30427600  | 6 | -4.48393800  | -19.78915400 | -2.30376700 |
| 1 | 15.98010500  | 14.28309300  | -0.02626200 | 6 | -5.58642500  | -18.91518900 | -2.08784000 |
| 1 | 14.65107700  | 12.77696600  | 0.15908800  | 6 | -6.87150600  | -19.43322000 | -2.24256600 |
| 1 | 13.08170700  | 10.97361400  | 0.28291800  | 6 | -7.10729700  | -20.74379200 | -2.64041500 |
| 1 | 11.70828200  | 9.67255500   | 0.68177800  | 6 | -6.01123800  | -21.57854500 | -2.98631800 |
| 1 | 10.12217100  | 7.89817900   | 0.88368800  | 6 | -4.71748800  | -21.09273200 | -2.77868200 |
| 1 | 8.75003900   | 6.63294500   | 1.26236000  | 6 | -8.46557900  | -21.25707400 | -2.76506100 |
| 1 | 7.30290900   | 4.74115700   | 1.32633600  | 6 | -9.53287100  | -20.53566200 | -2.25882000 |
| 1 | 6.18273300   | 3.27047300   | 1.40209600  | 6 | -10.85276900 | -20.88422400 | -2.50496100 |
| 1 | 4.86261500   | 1.29814900   | 1.42593800  | 6 | -11.12899100 | -22.01781900 | -3.30840200 |
| 1 | 3.89452300   | -0.25928000  | 1.43886900  | 6 | -10.05459500 | -22.82975800 | -3.71117600 |
| 1 | 2.66021500   | -2.28260800  | 1.50111900  | 6 | -8.72135100  | -22.47834500 | -3.43991900 |
| 1 | 1.73327900   | -3.86435200  | 1.57134700  | 6 | -11.65722100 | -18.93077100 | -1.23283500 |
| 1 | 0.60136000   | -5.95102900  | 1.65251200  | 6 | -12.52602400 | -17.85152000 | -1.10115000 |
| 1 | -0.01118800  | -7.70523200  | 1.47405400  | 6 | -13.75814300 | -17.88285800 | -1.80829400 |
| 1 | -0.97569300  | -9.89021500  | 1.46503300  | 6 | -14.11084900 | -19.04865500 | -2.51656100 |
| 1 | -1.39335600  | -11.70639600 | 0.95568400  | 6 | -13.20735700 | -20.10584700 | -2.67909100 |
| 1 | -2.23155200  | -13.94720800 | 0.80948600  | 6 | -11.92146200 | -19.98801900 | -2.08798400 |
| 1 | -2.75415800  | -15.73770300 | 0.22435100  | 6 | 15.12882200  | 15.72017100  | -1.59201200 |
| 1 | -3.56751400  | -17.98037800 | 0.01070800  | 6 | 14.87013200  | 17.06978000  | -1.87824000 |
| 1 | -15.98012600 | -14.28300700 | 0.02509000  | 6 | 13.52634700  | 17.53722600  | -1.80785100 |
| 1 | -17.32627500 | -16.27091900 | -0.30533300 | 6 | 12.49029900  | 16.70140800  | -1.50453900 |
| 1 | -13.08152900 | -10.97373100 | -0.28443000 | 6 | 12.71423900  | 15.33553100  | -1.17303500 |
| 1 | -14.65099000 | -12.77699200 | -0.16044800 | 6 | 14.04790100  | 14.86428900  | -1.15733400 |
| 1 | -10.12180600 | -7.89850200  | -0.88532400 | 6 | 11.89957000  | 13.15709600  | -0.34238900 |
| 1 | -11.70798200 | -9.67281500  | -0.68336400 | 6 | 11.61993300  | 14.43979100  | -0.84908400 |
| 1 | -7.30249200  | -4.74150500  | -1.32786900 | 6 | 10.25007600  | 14.79070300  | -1.06242500 |
| 1 | -8.74959200  | -6.63331800  | -1.26392500 | 6 | 9.23857500   | 13.89504200  | -0.85551300 |
| 1 | -4.86235000  | -1.29831500  | -1.42722300 | 6 | 9.48794700   | 12.59701800  | -0.31539800 |
| 1 | -6.18246600  | -3.27063700  | -1.40340700 | 6 | 10.81767700  | 12.27393800  | 0.02771700  |
| 1 | -2.66032200  | 2.28274000   | -1.50189800 | 6 | 8.70875600   | 10.46637000  | 0.65360500  |
| 1 | -3.89464400  | 0.25942200   | -1.43970700 | 6 | 8.43532300   | 11.62247700  | -0.10038100 |
| 1 | -0.60126200  | 5.95110500   | -1.65324700 | 6 | 7.12910700   | 11.74873400  | -0.66741200 |
| 1 | -1.73324100  | 3.86446600   | -1.57216000 | 6 | 6.19260300   | 10.75984800  | -0.54577300 |
| 1 | 0.97586700   | 9.89026600   | -1.46551400 | 6 | 6.42841200   | 9.59051600   | 0.24244200  |
| 1 | 0.01135300   | 7.70530000   | -1.47470100 | 6 | 7.66459500   | 9.50463200   | 0.91358300  |
| 1 | 2.23172900   | 13.94721800  | -0.80958400 | 6 | 5.72279800   | 7.45778700   | 1.27967500  |
| 1 | 1.39357000   | 11.70641800  | -0.95607500 | 6 | 5.46537600   | 8.51129900   | 0.37969100  |
| 1 | 3.56754600   | 17.98031900  | -0.01004400 | 6 | 4.26138100   | 8.43793700   | -0.38533100 |
| 1 | 2.75423700   | 15.73765800  | -0.22405000 | 6 | 3.41113400   | 7.36934600   | -0.29973400 |
|   |              |              |             | 6 | 3.65548800   | 6.27581900   | 0.58646100  |
|   |              |              |             | 6 | 4.80097400   | 6.35478900   | 1.40471500  |
|   |              |              |             | 6 | 3.11794600   | 4.05989500   | 1.55213600  |
|   |              |              |             | 6 | 2.79788800   | 5.10382100   | 0.66124400  |
|   |              |              |             | 6 | 1.62870900   | 4.93598500   | -0.14291000 |
|   |              |              |             | 6 | 0.87637900   | 3.79402900   | -0.10279400 |
|   |              |              |             | 6 | 1.21432200   | 2.69193000   | 0.74166200  |
|   |              |              |             | 6 | 2.33238000   | 2.84963800   | 1.58531800  |
|   |              |              |             | 6 | 0.88593500   | 0.39312000   | 1.60144300  |
|   |              |              |             | 6 | 0.47746200   | 1.43863900   | 0.74894600  |
|   |              |              |             | 6 | -0.65212900  | 1.18971900   | -0.09014600 |
|   |              |              |             | 6 | -1.28326700  | -0.02376100  | -0.11781100 |
|   |              |              |             | 6 | -0.85986700  | -1.11870700  | 0.69682600  |

### 38. [54]clarene

<2,2,22,2,2,24>

E(wB97XD/cc-pVDZ) = -8294.56566752  
 No imaginary frequency (B3LYP/6-31G\*)

|   |             |             |             |
|---|-------------|-------------|-------------|
| 6 | 13.80034300 | 23.99650300 | -2.16977000 |
| 6 | 13.26406400 | 25.18157700 | -2.73980700 |
| 6 | 11.90314500 | 25.45097600 | -2.55084600 |

|   |              |              |             |   |              |              |             |
|---|--------------|--------------|-------------|---|--------------|--------------|-------------|
| 6 | 0.20853800   | -0.88119800  | 1.58454000  | 6 | 6.46908700   | 15.30959200  | 1.26737100  |
| 6 | -0.98021700  | -3.46865500  | 1.46715000  | 6 | 5.17299700   | 15.15197900  | 0.74069000  |
| 6 | -1.46596100  | -2.43904700  | 0.63535300  | 6 | 4.45467900   | 13.91456900  | 0.93623700  |
| 6 | -2.53558900  | -2.76858300  | -0.25238800 | 6 | 4.97915500   | 12.90509900  | 1.76815300  |
| 6 | -3.05253300  | -4.03317300  | -0.32811200 | 6 | 6.28936900   | 13.10282500  | 2.29939100  |
| 6 | -2.53388200  | -5.11159400  | 0.45184000  | 6 | 9.21693900   | 17.88165300  | 1.23287300  |
| 6 | -1.49551500  | -4.81190400  | 1.35646900  | 6 | 8.59389100   | 19.00708000  | 0.61076900  |
| 6 | -2.33171200  | -7.50970700  | 1.01458900  | 6 | 7.25224800   | 18.88270600  | 0.20402100  |
| 6 | -3.00359900  | -6.48073300  | 0.32483700  | 6 | 6.55659900   | 17.62712100  | 0.38684800  |
| 6 | -4.13003100  | -6.85588100  | -0.47189100 | 6 | 7.18857400   | 16.54756900  | 1.04114600  |
| 6 | -4.53226400  | -8.15793000  | -0.58488800 | 6 | 8.54394900   | 16.71659900  | 1.45188600  |
| 6 | -3.78937000  | -9.22920300  | 0.00171900  | 6 | 11.41810800  | 21.44119500  | 0.29623500  |
| 6 | -2.65663100  | -8.89366500  | 0.76591400  | 6 | 10.83375300  | 22.48117500  | -0.47905500 |
| 6 | -3.19250900  | -11.62381900 | 0.16232200  | 6 | 9.44780900   | 22.48494600  | -0.68353300 |
| 6 | -4.12098400  | -10.62643000 | -0.20308000 | 6 | 8.68142900   | 21.32000600  | -0.29728600 |
| 6 | -5.36781400  | -11.05071900 | -0.75458700 | 6 | 9.31568100   | 20.23496800  | 0.35252600  |
| 6 | -5.65045200  | -12.37346600 | -0.95149500 | 6 | 10.68790900  | 20.36782200  | 0.70691700  |
| 6 | -4.67627400  | -13.39342000 | -0.71531300 | 6 | 9.63405700   | 24.64875900  | -1.83575700 |
| 6 | -3.42779100  | -13.00341900 | -0.19625100 | 6 | 8.87024800   | 23.64045500  | -1.33109900 |
| 6 | -3.85268400  | -15.72096300 | -0.98880800 | 6 | 15.42992200  | 25.61207700  | -3.82263300 |
| 6 | -4.91658700  | -14.78955200 | -1.02833300 | 6 | 14.16044800  | 26.00240900  | -3.53576400 |
| 6 | -6.21237000  | -15.26698200 | -1.37271300 | 6 | 19.04270300  | 20.52650000  | -3.77382800 |
| 6 | -6.42922200  | -16.58257700 | -1.66633600 | 6 | 18.76995300  | 21.83542200  | -4.00967500 |
| 6 | -5.36246300  | -17.52549600 | -1.71317100 | 6 | -2.97303200  | -18.01795800 | -1.57947100 |
| 6 | -4.06322000  | -17.08686800 | -1.41299900 | 6 | -3.16603600  | -19.28487700 | -2.03273900 |
| 6 | -10.32718700 | -15.47209800 | 0.77197800  | 6 | -7.57452300  | -23.28081200 | -3.82298300 |
| 6 | -10.87487700 | -14.21351500 | 0.39476700  | 6 | -6.30362300  | -22.87487100 | -3.57151200 |
| 6 | -12.12036400 | -14.19637100 | -0.27620400 | 6 | -13.47110700 | -21.29748100 | -3.46732700 |
| 6 | -12.75593100 | -15.43797300 | -0.66127400 | 6 | -12.50496300 | -22.21662400 | -3.72793700 |
| 6 | -12.07943600 | -16.64329100 | -0.43265500 | 6 | 17.47467600  | 16.01962400  | -2.24599100 |
| 6 | -10.90041600 | -16.63760700 | 0.36357200  | 6 | 16.47185200  | 15.22730600  | -1.78286000 |
| 6 | -8.19841100  | -11.81213200 | 1.51318600  | 6 | 14.28304000  | 13.53689200  | -0.68538200 |
| 6 | -8.70725000  | -10.55030200 | 1.08521400  | 6 | 13.26433400  | 12.74153900  | -0.25703400 |
| 6 | -9.94778800  | -10.53171200 | 0.41178100  | 6 | 11.06200500  | 11.06911000  | 0.75041700  |
| 6 | -10.70018300 | -11.75381100 | 0.22657800  | 6 | 10.04643300  | 10.23212100  | 1.09344100  |
| 6 | -10.15986600 | -12.98166600 | 0.65253000  | 6 | 7.86673800   | 8.44825400   | 1.84810400  |
| 6 | -8.88294100  | -12.97029500 | 1.29364500  | 6 | 6.92754600   | 7.48731700   | 2.04297300  |
| 6 | -6.15885400  | -8.07365800  | 2.36148300  | 6 | 5.04412200   | 5.30949700   | 2.34257000  |
| 6 | -6.61910800  | -6.83757400  | 1.81554000  | 6 | 4.24250900   | 4.21742200   | 2.41328400  |
| 6 | -7.74614500  | -6.87853100  | 0.97032900  | 6 | 2.69080400   | 1.77731400   | 2.45255600  |
| 6 | -8.47120600  | -8.11159100  | 0.77196400  | 6 | 2.00206300   | 0.60850600   | 2.46069800  |
| 6 | -7.98255200  | -9.31582100  | 1.31357200  | 6 | 0.61661400   | -1.93055400  | 2.45828300  |
| 6 | -6.78828900  | -9.25612000  | 2.09718000  | 6 | 0.05050800   | -3.16215400  | 2.40261100  |
| 6 | -4.27044100  | -4.23550700  | 3.23044600  | 6 | -0.94240600  | -5.86853700  | 2.13912800  |
| 6 | -4.65738300  | -3.04734500  | 2.53887700  | 6 | -1.32185800  | -7.15928400  | 1.95660500  |
| 6 | -5.70816800  | -3.15489000  | 1.60555000  | 6 | -1.80303600  | -9.94051600  | 1.22768800  |
| 6 | -6.37523600  | -4.41560500  | 1.38942100  | 6 | -2.03152900  | -11.23937600 | 0.89575600  |
| 6 | -5.95303600  | -5.57423500  | 2.07005600  | 6 | -2.39824800  | -13.98856100 | -0.08655300 |
| 6 | -4.87536200  | -5.43841000  | 2.99776500  | 6 | -2.58684800  | -15.27071000 | -0.50398500 |
| 6 | -2.27728300  | -0.38376200  | 3.78104300  | 6 | -14.03455500 | -15.50540900 | -1.33112900 |
| 6 | -2.65784200  | 0.76468000   | 3.02156000  | 6 | -14.53211400 | -16.66965600 | -1.83295400 |
| 6 | -3.75208500  | 0.62508500   | 2.14575800  | 6 | -11.98900700 | -11.76572600 | -0.39257300 |
| 6 | -4.40856200  | -0.64938700  | 1.98651100  | 6 | -12.66804400 | -12.92456800 | -0.62449000 |
| 6 | -4.00040000  | -1.76849900  | 2.73838000  | 6 | -9.70701500  | -8.13776800  | 0.05816200  |
| 6 | -2.91905700  | -1.58311700  | 3.65320900  | 6 | -10.42165300 | -9.28531600  | -0.09367000 |
| 6 | 2.20478100   | 7.11232600   | 3.61902000  | 6 | -7.47712100  | -4.51434900  | 0.48853900  |
| 6 | 1.83750700   | 8.14464500   | 2.70262700  | 6 | -8.14433800  | -5.68299100  | 0.30493000  |
| 6 | 0.65804500   | 7.95519500   | 1.95602700  | 6 | -5.46195700  | -0.80766400  | 1.04006200  |
| 6 | -2.38073900  | 3.11453600   | 2.30228000  | 6 | -6.08451200  | -2.00008500  | 0.86179100  |
| 6 | -1.95299500  | 2.03098500   | 3.09429900  | 6 | -3.53357600  | 2.94914100   | 1.48172000  |
| 6 | 1.46790300   | 5.96978100   | 3.75470300  | 6 | -4.18568800  | 1.76197500   | 1.40508900  |
| 6 | 4.61972100   | 10.69468000  | 2.94338100  | 6 | 1.01532000   | 10.07673300  | 0.82905700  |
| 6 | 4.20441500   | 11.70543500  | 2.02345100  | 6 | 0.27958700   | 8.95090100   | 1.00942300  |
| 6 | 2.98131600   | 11.51130500  | 1.35243900  | 6 | 3.21068700   | 13.68194200  | 0.28128900  |
| 6 | 2.20942200   | 10.31203400  | 1.56876000  | 6 | 2.52005600   | 12.52661700  | 0.46256200  |
| 6 | 2.63398500   | 9.34067800   | 2.49770400  | 6 | 5.23094000   | 17.43588200  | -0.10258400 |
| 6 | 3.86578100   | 9.57978900   | 3.17964100  | 6 | 4.58187900   | 16.24959400  | 0.04560700  |
| 6 | 7.01063300   | 14.23156000  | 2.03455800  | 6 | 7.29866800   | 21.18011600  | -0.62468600 |

6 6.62319700 20.01901300 -0.39404400  
6 -0.10454800 3.40962400 3.90579300  
6 -0.49029500 4.51266900 3.08411800  
6 -1.64814500 4.35721400 2.29699500  
6 -0.79813200 2.23271000 3.91054900  
6 -0.13611800 6.76266800 2.12215700  
6 0.27571700 5.74230600 3.00149600  
6 -1.34250400 6.58619100 1.38548400  
6 -2.06430700 5.44062900 1.47062200  
1 11.45900300 26.32780100 -3.02954800  
1 13.46300700 22.37489900 -0.82645200  
1 17.84617800 24.40349600 -4.43292100  
1 14.76765800 21.55483500 -1.82032900  
1 19.25512500 17.83363900 -3.22671300  
1 14.80469600 19.74157200 -2.20148900  
1 -7.71880900 -18.78033700 -2.06033000  
1 -3.86085700 -21.73524400 -2.99905900  
1 -9.32556500 -19.63036000 -1.70095000  
1 -10.25819500 -23.73793200 -4.28496300  
1 -10.69514400 -18.88784100 -0.73403200  
1 -15.08442100 -19.09487100 -3.01183500  
1 13.29420700 18.57668400 -2.03443700  
1 11.48029200 17.10967200 -1.48954500  
1 9.99154700 15.77904500 -1.44006800  
1 8.21518800 14.20548600 -1.06722700  
1 6.87461600 12.63579900 -1.24733400  
1 5.22572200 10.90001100 -1.02912200  
1 4.01327500 9.24147700 -1.07836000  
1 2.51910700 7.36991400 -0.92507700  
1 1.31412500 5.73674900 -0.81152300  
1 -0.00512500 3.73595000 -0.74032900  
1 -1.03133100 1.98154000 -0.73515600  
1 -2.13692100 -0.14500300 -0.78395200  
1 -2.96689200 -1.99754500 -0.88967400  
1 -3.87042500 -4.21590800 -1.02461500  
1 -4.72015400 -6.08662600 -0.97002600  
1 -5.42370400 -8.37670200 -1.17268300  
1 -6.13727500 -10.31307700 -0.98340200  
1 -6.63414300 -12.63647800 -1.33818800  
1 -7.06320200 -14.58643200 -1.37577400  
1 -7.44593000 -16.89200900 -1.90358000  
1 -9.42334600 -15.52219900 1.37568200  
1 -10.44030900 -17.57830000 0.66340000  
1 -7.22556300 -11.87062000 1.99834500  
1 -8.42374600 -13.90236100 1.61724800  
1 -5.25662100 -8.09366400 2.97153300  
1 -6.36651300 -10.16787600 2.51711800  
1 -3.45426600 -4.20117300 3.95086100  
1 -4.51787400 -6.30957400 3.54513700  
1 -1.44178500 -0.31944600 4.47701300  
1 -2.56845300 -2.42077300 4.25447000  
1 3.10954600 7.21469300 4.21648800  
1 1.82026700 5.21112300 4.45241700  
1 5.55943000 10.80554400 3.48282800  
1 4.23978100 8.84823200 3.89466000  
1 8.01786400 14.30555100 2.44157200  
1 6.75511600 12.32030400 2.89724700  
1 10.25906900 17.93375500 1.54208700  
1 9.07702400 15.89204600 1.92222800  
1 12.46889100 21.49544400 0.57796600  
1 11.18365400 19.59721100 1.29366000  
1 9.15493900 25.50795300 -2.31009200  
1 7.78653400 23.71981500 -1.41463400  
1 16.07430400 26.25894700 -4.42237900  
1 13.78754700 26.95730100 -3.91322200  
1 20.00807000 20.11006900 -4.07042000  
1 19.51314500 22.46656200 -4.50225700  
1 -1.95339200 -17.68928600 -1.38282300

1 -2.30984200 -19.94495000 -2.18739100  
1 -7.75310900 -24.24291400 -4.30854100  
1 -5.46312700 -23.51529900 -3.84848700  
1 -14.47975800 -21.44345700 -3.86063400  
1 -12.74371700 -23.10142700 -4.32249900  
1 18.46698600 15.59777400 -2.41927500  
1 16.68763600 14.17596400 -1.59711800  
1 15.29984100 13.15082800 -0.63201700  
1 13.50606100 11.74419300 0.10656900  
1 12.07203500 10.82156300 1.07254100  
1 10.28559600 9.33457800 1.66043400  
1 8.77760700 8.41324200 2.44295100  
1 7.13413700 6.71398600 2.77854500  
1 5.88906900 5.36581200 3.02427700  
1 4.48551900 3.45444400 3.14840400  
1 3.54512000 1.86825200 3.11840500  
1 2.34084800 -0.17602200 3.13242900  
1 1.40145300 -1.76380400 3.19171700  
1 0.41161800 -3.91998200 3.09339500  
1 -0.17520800 -5.66297900 2.88132900  
1 -0.85409800 -7.92954900 2.56699700  
1 -0.91052700 -9.70327800 1.80342200  
1 -1.32559400 -11.99559700 1.23483100  
1 -1.41542500 -13.70671200 0.28758500  
1 -1.75292100 -15.96719000 -0.43176700  
1 -14.63160900 -14.59959200 -1.43477300  
1 -15.50723100 -16.67628900 -2.32478400  
1 -12.45540100 -10.83013800 -0.69575200  
1 -13.63848800 -12.86772000 -1.11594400  
1 -10.12127800 -7.21869400 -0.35086200  
1 -11.36775700 -9.23638500 -0.62918200  
1 -7.82224500 -3.63984500 -0.05730300  
1 -8.98348600 -5.69368300 -0.38731100  
1 -5.78480600 0.03143000 0.42910600  
1 -6.87585800 -2.05576700 0.11862000  
1 -3.91387600 3.77833100 0.89074500  
1 -5.05946800 1.70106800 0.76136800  
1 0.67559200 10.79454100 0.08670600  
1 -0.61233000 8.82253900 0.40140300  
1 2.80284200 14.42414900 -0.40158500  
1 1.58305900 12.40376400 -0.07478300  
1 4.71811900 18.24236800 -0.62295400  
1 3.57218000 16.16530700 -0.35066300  
1 6.76727600 22.00397200 -1.09943300  
1 5.57435200 19.97143600 -0.68125200  
1 0.78362300 3.48564300 4.53169000  
1 -0.43203400 1.42241500 4.53968400  
1 -1.71415800 7.37604300 0.73770000  
1 -2.97517400 5.36753700 0.88197800

### 39. [54]clarene

<2,16,2,16,2,16>

E(wB97XD/cc-pVDZ) = -8294.51412976  
No imaginary frequency (B3LYP/6-31G\*)

6 20.77116700 8.73324300 -0.00601900  
6 20.07375100 9.93846400 -0.00569200  
6 18.64723600 9.91703500 -0.00413800  
6 18.00177100 8.68428400 -0.00301300  
6 18.69115900 7.46361500 -0.00334100  
6 20.11250900 7.49579500 -0.00490100  
6 18.64516200 12.41436000 -0.00535200  
6 17.95080200 13.62139500 -0.00533700  
6 16.54982400 13.67046500 -0.00387600

|   |              |              |             |   |              |              |             |
|---|--------------|--------------|-------------|---|--------------|--------------|-------------|
| 6 | 15.81068800  | 12.45601300  | -0.00220300 | 6 | -1.42927200  | -22.35595200 | -0.00136900 |
| 6 | 16.52243500  | 11.24821700  | -0.00227700 | 6 | -15.93510300 | 4.89892900   | 0.00038000  |
| 6 | 17.91271300  | 11.19007100  | -0.00387200 | 6 | -16.58572400 | 6.09643800   | -0.00053200 |
| 6 | 3.56438400   | -21.16888500 | -0.00082700 | 6 | -18.00555100 | 6.17789500   | -0.00223100 |
| 6 | 2.88181000   | -19.92173100 | 0.00010800  | 6 | -18.74465600 | 4.98034700   | -0.00283900 |
| 6 | 1.47997100   | -19.93448700 | 0.00024800  | 6 | -18.05597400 | 3.70824300   | -0.00190600 |
| 6 | 0.73484600   | -21.10966200 | -0.00049800 | 6 | -16.64454000 | 3.66503900   | -0.00033900 |
| 6 | 1.42927200   | -22.35595200 | -0.00136900 | 6 | -13.86719900 | 1.13261200   | 0.00255800  |
| 6 | 2.82173600   | -22.35779900 | -0.00150500 | 6 | -14.52576900 | 2.32364500   | 0.00194300  |
| 6 | 18.74465600  | 4.98034700   | -0.00283800 | 6 | -15.95043000 | 2.39400300   | 0.00046500  |
| 6 | 18.00555100  | 6.17789500   | -0.00223000 | 6 | -16.67565000 | 1.18611800   | -0.00026900 |
| 6 | 16.58572400  | 6.09643800   | -0.00053100 | 6 | -15.97503900 | -0.08245700  | 0.00044300  |
| 6 | 15.93510300  | 4.89893000   | 0.00038100  | 6 | -14.56542900 | -0.11125300  | 0.00179000  |
| 6 | 16.64454000  | 3.66503900   | -0.00033800 | 6 | -11.76490500 | -2.61670000  | 0.00390700  |
| 6 | 18.05597400  | 3.70824300   | -0.00190500 | 6 | -12.43420100 | -1.43191200  | 0.00355500  |
| 6 | 16.67565000  | 1.18611800   | -0.00026700 | 6 | -13.85980700 | -1.37456100  | 0.00232500  |
| 6 | 15.95043000  | 2.39400300   | 0.00046600  | 6 | -14.57428400 | -2.58963000  | 0.00156900  |
| 6 | 14.52576900  | 2.32364500   | 0.00194400  | 6 | -13.86141800 | -3.85182200  | 0.00199000  |
| 6 | 13.86719900  | 1.13261200   | 0.00256000  | 6 | -12.45175900 | -3.86731100  | 0.00309100  |
| 6 | 14.56542900  | -0.11125300  | 0.00179200  | 6 | -9.62803700  | -6.34653000  | 0.00439400  |
| 6 | 15.97503900  | -0.08245700  | 0.00044400  | 6 | -10.30827300 | -5.16802200  | 0.00429200  |
| 6 | 14.57428400  | -2.58963000  | 0.00157000  | 6 | -11.73439100 | -5.12388800  | 0.00333300  |
| 6 | 13.85980700  | -1.37456100  | 0.00232600  | 6 | -12.43754900 | -6.34656400  | 0.00255000  |
| 6 | 12.43420100  | -1.43191200  | 0.00355600  | 6 | -11.71294100 | -7.60118400  | 0.00269500  |
| 6 | 11.76490500  | -2.61670000  | 0.00390800  | 6 | -10.30322700 | -7.60350000  | 0.00356900  |
| 6 | 12.45175900  | -3.86731100  | 0.00309300  | 6 | -7.45647500  | -10.05611900 | 0.00419700  |
| 6 | 13.86141800  | -3.85182200  | 0.00199100  | 6 | -8.14767000  | -8.88400300  | 0.00433400  |
| 6 | 12.43754900  | -6.34656400  | 0.00255100  | 6 | -9.57411800  | -8.85327600  | 0.00356500  |
| 6 | 11.73439100  | -5.12388800  | 0.00333500  | 6 | -10.26585400 | -10.08158900 | 0.00273400  |
| 6 | 10.30827300  | -5.16802200  | 0.00429400  | 6 | -9.52952100  | -11.33023600 | 0.00262500  |
| 6 | 9.62803700   | -6.34653000  | 0.00439500  | 6 | -8.11992100  | -11.31924700 | 0.00329700  |
| 6 | 10.30322700  | -7.60350000  | 0.00357000  | 6 | -5.25050900  | -13.74518700 | 0.00325200  |
| 6 | 11.71294100  | -7.60118400  | 0.00269700  | 6 | -5.95260900  | -12.57932400 | 0.00358100  |
| 6 | 10.26585400  | -10.08158900 | 0.00273500  | 6 | -7.37894200  | -12.56209000 | 0.00303200  |
| 6 | 9.57411800   | -8.85327600  | 0.00356600  | 6 | -8.05901000  | -13.79709600 | 0.00215700  |
| 6 | 8.14767000   | -8.88400300  | 0.00433500  | 6 | -7.31084000  | -15.03819300 | 0.00180200  |
| 6 | 7.45647500   | -10.05611900 | 0.00419800  | 6 | -5.90210300  | -15.01406100 | 0.00234000  |
| 6 | 8.11992100   | -11.31924700 | 0.00329900  | 6 | -3.01326100  | -17.41500500 | 0.00186800  |
| 6 | 9.52952100   | -11.33023600 | 0.00262600  | 6 | -3.72511300  | -16.25288600 | 0.00241200  |
| 6 | 8.05901000   | -13.79709600 | 0.00215800  | 6 | -5.14844300  | -16.25063900 | 0.00190700  |
| 6 | 7.37894200   | -12.56209000 | 0.00303300  | 6 | -5.81674300  | -17.49456100 | 0.00092800  |
| 6 | 5.95260900   | -12.57932400 | 0.00358200  | 6 | -5.05934100  | -18.72692800 | 0.00040300  |
| 6 | 5.25050900   | -13.74518700 | 0.00325300  | 6 | -3.65267700  | -18.68533200 | 0.00081000  |
| 6 | 5.90210300   | -15.01406100 | 0.00234100  | 6 | 14.35446700  | 12.50577400  | -0.00061800 |
| 6 | 7.31084000   | -15.03819300 | 0.00180300  | 6 | 13.68749400  | 13.74500400  | -0.00114400 |
| 6 | 5.81674300   | -17.49456000 | 0.00092900  | 6 | 12.24150300  | 13.78527300  | 0.00007000  |
| 6 | 5.14844300   | -16.25063800 | 0.00190700  | 6 | 11.49784700  | 12.58491100  | 0.00206700  |
| 6 | 3.72511300   | -16.25288600 | 0.00241200  | 6 | 12.21114100  | 11.35323000  | 0.00281200  |
| 6 | 3.01326100   | -17.41500500 | 0.00186800  | 6 | 13.57348100  | 11.31725500  | 0.00147900  |
| 6 | 3.65267700   | -18.68533200 | 0.00080100  | 6 | 10.05007200  | 12.61990600  | 0.00320900  |
| 6 | 5.05934100   | -18.72692700 | 0.00040300  | 6 | 9.36713200   | 13.85231300  | 0.00213700  |
| 6 | -18.00177100 | 8.68428400   | -0.00301400 | 6 | 7.91818300   | 13.88046100  | 0.00300100  |
| 6 | -18.64723600 | 9.91703500   | -0.00413900 | 6 | 7.18797400   | 12.67439900  | 0.00501100  |
| 6 | -20.07375100 | 9.93846400   | -0.00569300 | 6 | 7.91556000   | 11.44751200  | 0.00624800  |
| 6 | -20.77116700 | 8.73324300   | -0.00601900 | 6 | 9.27626800   | 11.42165300  | 0.00537300  |
| 6 | -20.11250900 | 7.49579400   | -0.00490200 | 6 | 5.74111700   | 12.69528700  | 0.00569300  |
| 6 | -18.69115900 | 7.46361500   | -0.00334200 | 6 | 5.04634200   | 13.92185500  | 0.00428500  |
| 6 | -15.81068800 | 12.45601300  | -0.00220400 | 6 | 3.59678100   | 13.93595500  | 0.00471500  |
| 6 | -16.54982500 | 13.67046500  | -0.00387700 | 6 | 2.87834400   | 12.72303800  | 0.00656300  |
| 6 | -17.95080200 | 13.62139500  | -0.00533800 | 6 | 3.61764100   | 11.50277900  | 0.00813100  |
| 6 | -18.64516200 | 12.41436000  | -0.00535300 | 6 | 4.97831700   | 11.48955500  | 0.00771300  |
| 6 | -17.91271300 | 11.19007100  | -0.00387200 | 6 | 1.43146500   | 12.73000500  | 0.00676900  |
| 6 | -16.52243500 | 11.24821700  | -0.00227800 | 6 | 0.72482800   | 13.94982600  | 0.00513600  |
| 6 | -0.73484600  | -21.10966200 | -0.00049800 | 6 | -0.72482800  | 13.94982600  | 0.00513600  |
| 6 | -1.47997100  | -19.93448700 | 0.00024800  | 6 | -1.43146500  | 12.73000500  | 0.00676900  |
| 6 | -2.88181000  | -19.92173100 | 0.00010800  | 6 | -0.68036300  | 11.51692200  | 0.00852200  |
| 6 | -3.56438400  | -21.16888500 | -0.00082800 | 6 | 0.68036200   | 11.51692200  | 0.00852200  |
| 6 | -2.82173600  | -22.35779900 | -0.00150500 | 6 | -2.87834400  | 12.72303800  | 0.00656300  |



|   |              |              |             |   |              |              |             |
|---|--------------|--------------|-------------|---|--------------|--------------|-------------|
| 6 | -3.59678100  | 13.93595500  | 0.00471500  | 6 | -7.18151400  | 15.10372800  | 0.00178300  |
| 6 | -5.04634200  | 13.92185500  | 0.00428500  | 6 | -10.15085700 | 15.04704500  | 0.00013000  |
| 6 | -5.74111800  | 12.69528700  | 0.00569300  | 6 | -11.51337200 | 15.01547900  | -0.00080400 |
| 6 | -4.97831700  | 11.48955500  | 0.00771300  | 1 | 21.86412300  | 8.75050500   | -0.00723300 |
| 6 | -3.61764100  | 11.50277900  | 0.00813100  | 1 | 16.91612800  | 8.66752300   | -0.00191600 |
| 6 | -7.18797400  | 12.67439900  | 0.00501100  | 1 | 18.51277000  | 14.55895500  | -0.00654900 |
| 6 | -7.91818300  | 13.88046100  | 0.00300100  | 1 | 15.96443000  | 10.31682800  | -0.00113000 |
| 6 | -9.36713200  | 13.85231300  | 0.00213700  | 1 | 0.95203400   | -18.98562600 | 0.00090700  |
| 6 | -10.05007200 | 12.61990600  | 0.00320900  | 1 | 3.35299300   | -23.31310400 | -0.00220400 |
| 6 | -9.27626900  | 11.42165300  | 0.00537300  | 1 | 15.98617000  | 7.00479300   | 0.00010300  |
| 6 | -7.91556000  | 11.44751200  | 0.00624800  | 1 | 14.84729000  | 4.90733600   | 0.00168700  |
| 6 | -11.49784700 | 12.58491100  | 0.00206600  | 1 | 13.93250200  | 3.23557700   | 0.00258100  |
| 6 | -12.24150400 | 13.78527300  | 0.00007000  | 1 | 12.77944700  | 1.15013300   | 0.00366600  |
| 6 | -13.68749400 | 13.74500400  | -0.00114500 | 1 | 11.84960600  | -0.51439100  | 0.00421000  |
| 6 | -14.35446700 | 12.50577400  | -0.00061800 | 1 | 10.67734700  | -2.58934400  | 0.00484000  |
| 6 | -13.57348100 | 11.31725500  | 0.00147800  | 1 | 9.73209600   | -4.24522000  | 0.00492700  |
| 6 | -12.21114100 | 11.35323000  | 0.00281200  | 1 | 8.54076400   | -6.30919900  | 0.00511700  |
| 6 | 20.83201800  | 6.25461100   | -0.00536200 | 1 | 7.58007700   | -7.95590400  | 0.00502300  |
| 6 | 20.18289300  | 5.06276700   | -0.00441400 | 1 | 6.36957900   | -10.00884300 | 0.00479400  |
| 6 | 20.76763600  | 11.20948600  | -0.00699900 | 1 | 5.39377200   | -11.64590000 | 0.00424400  |
| 6 | 20.09280800  | 12.37900100  | -0.00687500 | 1 | 4.16409800   | -13.68773700 | 0.00367200  |
| 6 | -0.67513100  | -23.59213700 | -0.00215100 | 1 | 3.17446200   | -15.31465300 | 0.00323900  |
| 6 | 0.67513100   | -23.59213700 | -0.00215100 | 1 | 1.92677500   | -17.35040600 | 0.00229100  |
| 6 | 18.75670900  | 2.46221900   | -0.00256500 | 1 | -16.91612800 | 8.66752300   | -0.00191700 |
| 6 | 18.10220600  | 1.26678900   | -0.00178500 | 1 | -21.86412300 | 8.75050500   | -0.00723400 |
| 6 | 16.66578300  | -1.33222800  | -0.00021000 | 1 | -18.51277000 | 14.55895500  | -0.00654900 |
| 6 | 16.00063800  | -2.52262200  | 0.00033600  | 1 | -15.96443000 | 10.31682800  | -0.00113100 |
| 6 | 14.54049300  | -5.10781100  | 0.00128300  | 1 | -0.95203400  | -18.98562600 | 0.00090700  |
| 6 | 13.86433000  | -6.29204200  | 0.00156600  | 1 | -3.35299200  | -23.31310400 | -0.00220500 |
| 6 | 12.38027300  | -8.86346500  | 0.00193200  | 1 | -14.84729000 | 4.90733600   | 0.00168600  |
| 6 | 11.69307600  | -10.04133200 | 0.00196300  | 1 | -15.98617000 | 7.00479300   | 0.00010200  |
| 6 | 10.18490200  | -12.59890500 | 0.00181100  | 1 | -12.77944700 | 1.15013300   | 0.00366400  |
| 6 | 9.48670300   | -13.77022300 | 0.00160500  | 1 | -13.93250200 | 3.23557700   | 0.00258000  |
| 6 | 7.95426800   | -16.31396600 | 0.00085000  | 1 | -10.67734700 | -2.58934400  | 0.00483800  |
| 6 | 7.24619500   | -17.47846600 | 0.00043900  | 1 | -11.84960600 | -0.51439100  | 0.00420800  |
| 6 | 5.70688800   | -20.01377900 | -0.00055500 | 1 | -8.54076400  | -6.30919900  | 0.00511500  |
| 6 | 4.99905400   | -21.17171600 | -0.00110700 | 1 | -9.73209600  | -4.24522000  | 0.00492500  |
| 6 | -20.09280800 | 12.37900100  | -0.00687500 | 1 | -6.36957900  | -10.00884300 | 0.00479300  |
| 6 | -20.76763600 | 11.20948600  | -0.00700000 | 1 | -7.58007700  | -7.95590400  | 0.00502200  |
| 6 | -14.47853700 | 14.94895600  | -0.00288600 | 1 | -4.16409800  | -13.68773700 | 0.00367100  |
| 6 | -15.83525900 | 14.91452400  | -0.00409700 | 1 | -5.39377200  | -11.64590000 | 0.00424200  |
| 6 | -5.70688800  | -20.01377900 | -0.00055500 | 1 | -1.92677400  | -17.35040600 | 0.00229100  |
| 6 | -4.99905400  | -21.17171600 | -0.00110700 | 1 | -3.17446200  | -15.31465300 | 0.00323900  |
| 6 | -20.83201800 | 6.25461100   | -0.00536300 | 1 | 11.67391200  | 10.40728700  | 0.00441300  |
| 6 | -20.18289300 | 5.06276700   | -0.00441500 | 1 | 14.05988400  | 10.34361900  | 0.00213500  |
| 6 | -18.75670900 | 2.46221900   | -0.00256700 | 1 | 7.38620900   | 10.49708300  | 0.00789800  |
| 6 | -18.10220600 | 1.26678900   | -0.00178600 | 1 | 9.76859700   | 10.45154000  | 0.00639700  |
| 6 | -16.66578300 | -1.33222800  | -0.00021200 | 1 | 3.09699400   | 10.54754100  | 0.00968900  |
| 6 | -16.00063800 | -2.52262200  | 0.00033500  | 1 | 5.47990800   | 10.52419800  | 0.00896500  |
| 6 | -14.54049300 | -5.10781100  | 0.00128100  | 1 | -1.19156700  | 10.55660500  | 0.00987300  |
| 6 | -13.86433000 | -6.29204200  | 0.00156400  | 1 | 1.19156700   | 10.55660500  | 0.00987300  |
| 6 | -12.38027300 | -8.86346600  | 0.00193100  | 1 | -5.47990800  | 10.52419800  | 0.00896500  |
| 6 | -11.69307600 | -10.04133200 | 0.00196100  | 1 | -3.09699400  | 10.54754100  | 0.00968900  |
| 6 | -10.18490200 | -12.59890500 | 0.00181000  | 1 | -9.76859700  | 10.45154000  | 0.00639800  |
| 6 | -9.48670300  | -13.77022300 | 0.00160400  | 1 | -7.38620900  | 10.49708300  | 0.00789800  |
| 6 | -7.95426800  | -16.31396600 | 0.00084900  | 1 | -14.05988400 | 10.34361900  | 0.00213400  |
| 6 | -7.24619500  | -17.47846600 | 0.00043800  | 1 | -11.67391200 | 10.40728700  | 0.00441200  |
| 6 | 15.83525900  | 14.91452400  | -0.00409600 | 1 | 21.92360900  | 6.28400700   | -0.00654200 |
| 6 | 14.47853700  | 14.94895600  | -0.00288600 | 1 | 20.77602100  | 4.15002100   | -0.00485900 |
| 6 | 11.51337200  | 15.01547900  | -0.00080400 | 1 | 21.85969200  | 11.19964800  | -0.00814700 |
| 6 | 10.15085600  | 15.04704500  | 0.00013000  | 1 | 20.63084800  | 13.32936400  | -0.00793000 |
| 6 | 7.18151400   | 15.10372800  | 0.00178300  | 1 | -1.22942700  | -24.53310800 | -0.00277200 |
| 6 | 5.81801200   | 15.12331300  | 0.00237500  | 1 | 1.22942700   | -24.53310800 | -0.00277100 |
| 6 | 2.84851200   | 15.15198700  | 0.00322900  | 1 | 19.84512100  | 2.44939500   | -0.00375200 |
| 6 | 1.48481100   | 15.15856000  | 0.00343100  | 1 | 18.69868200  | 0.35606300   | -0.00239300 |
| 6 | -1.48481100  | 15.15856000  | 0.00343100  | 1 | 17.75427400  | -1.35276000  | -0.00116200 |
| 6 | -2.84851200  | 15.15198700  | 0.00322900  | 1 | 16.58890800  | -3.43865100  | -0.00022300 |
| 6 | -5.81801200  | 15.12331300  | 0.00237500  | 1 | 15.62875600  | -5.13838500  | 0.00049600  |

|   |              |              |             |   |              |              |             |
|---|--------------|--------------|-------------|---|--------------|--------------|-------------|
| 1 | 14.44399400  | -7.21354800  | 0.00098800  | 6 | 14.93612000  | 20.75438400  | -0.99836500 |
| 1 | 13.46820200  | -8.90419900  | 0.00129700  | 6 | 15.51310800  | 19.49290500  | -0.88344200 |
| 1 | 12.26393500  | -10.96834200 | 0.00134800  | 6 | 16.79139400  | 19.38695000  | -0.27113100 |
| 1 | 11.27238900  | -12.64994500 | 0.00133400  | 6 | -8.32200800  | -23.44361000 | -0.43118700 |
| 1 | 10.04877000  | -14.70259300 | 0.00098600  | 6 | -9.19229500  | -22.32636900 | -0.29271400 |
| 1 | 9.04123600   | -16.37506800 | 0.00039500  | 6 | -10.55803300 | -22.57260300 | -0.16831900 |
| 1 | 7.80144400   | -18.41467600 | -0.00031900 | 6 | -11.09747400 | -23.85106600 | -0.22871400 |
| 1 | 6.79393900   | -20.07104700 | -0.00084500 | 6 | -10.24803100 | -24.95763100 | -0.49508900 |
| 1 | 5.51923700   | -22.13184800 | -0.00182400 | 6 | -8.86925600  | -24.73447200 | -0.55505900 |
| 1 | -20.63084800 | 13.32936400  | -0.00793100 | 6 | -12.53441000 | -24.05954500 | -0.10723600 |
| 1 | -21.85969200 | 11.19964800  | -0.00814800 | 6 | -13.35457300 | -23.02463500 | 0.30666200  |
| 1 | -13.98495600 | 15.91916900  | -0.00317500 | 6 | -14.73739200 | -23.08862500 | 0.22108900  |
| 1 | -16.40695200 | 15.84489900  | -0.00533100 | 6 | -15.34156800 | -24.26588700 | -0.28538100 |
| 1 | -6.79393900  | -20.07104700 | -0.00084600 | 6 | -14.52179200 | -25.37400700 | -0.56338000 |
| 1 | -5.51923700  | -22.13184800 | -0.00182500 | 6 | -13.12140300 | -25.29640300 | -0.47679000 |
| 1 | -21.92360900 | 6.28400700   | -0.00654300 | 6 | -14.93599800 | -20.75443600 | 0.99862300  |
| 1 | -20.77602200 | 4.15002000   | -0.00486000 | 6 | -15.51303100 | -19.49295200 | 0.88393800  |
| 1 | -19.84512100 | 2.44939500   | -0.00375300 | 6 | -16.79142600 | -19.38695500 | 0.27185800  |
| 1 | -18.69868200 | 0.35606300   | -0.00239400 | 6 | -17.47535000 | -20.56279900 | -0.09385800 |
| 1 | -17.75427400 | -1.35276100  | -0.00116300 | 6 | -16.85897000 | -21.81795800 | -0.02493800 |
| 1 | -16.58890800 | -3.43865100  | -0.00022400 | 6 | -15.52528800 | -21.88658900 | 0.45817000  |
| 1 | -15.62875600 | -5.13838500  | 0.00049500  | 6 | 15.14470100  | 17.06249500  | -0.69476300 |
| 1 | -14.44399400 | -7.21354900  | 0.00098600  | 6 | 14.73174700  | 18.30722900  | -1.18847600 |
| 1 | -13.46820200 | -8.90419900  | 0.00129600  | 6 | 13.49651800  | 18.39930700  | -1.88855000 |
| 1 | -12.26393500 | -10.96834200 | 0.00134700  | 6 | 12.64355200  | 17.34023100  | -1.96685200 |
| 1 | -11.27238900 | -12.64994500 | 0.00133300  | 6 | 12.94383200  | 16.10548800  | -1.32540000 |
| 1 | -10.04877000 | -14.70259300 | 0.00098500  | 6 | 14.21512500  | 15.95397400  | -0.72294000 |
| 1 | -9.04123600  | -16.37506800 | 0.00039400  | 6 | 12.26598900  | 13.85300000  | -0.56484700 |
| 1 | -7.80144400  | -18.41467600 | -0.00032000 | 6 | 11.96544300  | 15.03998600  | -1.25917100 |
| 1 | 16.40695200  | 15.84489900  | -0.00533100 | 6 | 10.67335600  | 15.16059900  | -1.85733200 |
| 1 | 13.98495600  | 15.91917000  | -0.00317500 | 6 | 9.75396200   | 14.15615700  | -1.79306100 |
| 1 | 12.04709300  | 15.96414200  | -0.00236300 | 6 | 10.01818700  | 12.94261800  | -1.09160800 |
| 1 | 9.66077100   | 16.01919000  | -0.00071200 | 6 | 11.26557500  | 12.81433300  | -0.44352900 |
| 1 | 7.70800300   | 16.05661200  | 0.00028600  | 6 | 9.32780200   | 10.72127000  | -0.25660400 |
| 1 | 5.31912700   | 16.09095500  | 0.00132200  | 6 | 9.05156100   | 11.86308000  | -1.03323300 |
| 1 | 3.36577400   | 16.10991100  | 0.00185800  | 6 | 7.82606700   | 11.88438700  | -1.76883400 |
| 1 | 0.97676700   | 16.12141300  | 0.00221400  | 6 | 6.97804200   | 10.81424800  | -1.78717000 |
| 1 | -0.97676700  | 16.12141300  | 0.00221400  | 6 | 7.23678500   | 9.63503800   | -1.02563800 |
| 1 | -3.36577400  | 16.10991100  | 0.00185800  | 6 | 8.38654300   | 9.62727200   | -0.21003900 |
| 1 | -5.31912700  | 16.09095500  | 0.00132200  | 6 | 6.62542100   | 7.38604900   | -0.20070000 |
| 1 | -7.70800300  | 16.05661200  | 0.00028600  | 6 | 6.36212800   | 8.47739100   | -1.05132900 |
| 1 | -9.66077100  | 16.01919000  | -0.00071200 | 6 | 5.23476600   | 8.37390700   | -1.92245000 |
| 1 | -12.04709300 | 15.96414200  | -0.00236300 | 6 | 4.46357300   | 7.24632900   | -1.97603800 |
|   |              |              |             | 6 | 4.72036000   | 6.11233700   | -1.14663700 |
|   |              |              |             | 6 | 5.78852800   | 6.21196700   | -0.23316700 |
|   |              |              |             | 6 | 4.21638400   | 3.83642600   | -0.31510000 |
|   |              |              |             | 6 | 3.93607300   | 4.88942700   | -1.20795600 |
|   |              |              |             | 6 | 2.88429700   | 4.67861900   | -2.15118000 |
|   |              |              |             | 6 | 2.18838300   | 3.50172300   | -2.21325600 |
|   |              |              |             | 6 | 2.45817400   | 2.41264000   | -1.32958500 |
|   |              |              |             | 6 | 3.47087100   | 2.60403400   | -0.36892400 |
|   |              |              |             | 6 | 2.07110200   | 0.12459400   | -0.46643600 |
|   |              |              |             | 6 | 1.74791500   | 1.14377000   | -1.38370800 |
|   |              |              |             | 6 | 0.72145900   | 0.85716100   | -2.33496200 |
|   |              |              |             | 6 | 0.07375900   | -0.34833200  | -2.36708700 |
|   |              |              |             | 6 | 0.38449800   | -1.40133000  | -1.45326300 |
|   |              |              |             | 6 | 1.39537900   | -1.14791900  | -0.50534400 |
|   |              |              |             | 6 | 0.09003200   | -3.67922000  | -0.52932500 |
|   |              |              |             | 6 | -0.28804800  | -2.69093500  | -1.45992600 |
|   |              |              |             | 6 | -1.34039800  | -3.02251600  | -2.36711700 |
|   |              |              |             | 6 | -1.97801000  | -4.23266200  | -2.32999400 |
|   |              |              |             | 6 | -1.61692800  | -5.25158200  | -1.39621700 |
|   |              |              |             | 6 | -0.55916700  | -4.96613100  | -0.51140800 |
|   |              |              |             | 6 | -1.81610300  | -7.51999800  | -0.42562100 |
|   |              |              |             | 6 | -2.28439100  | -6.54111100  | -1.32548900 |
|   |              |              |             | 6 | -3.42827500  | -6.87304500  | -2.11254000 |
|   |              |              |             | 6 | -4.07156300  | -8.07370900  | -1.98413100 |
|   |              |              |             | 6 | -3.59531700  | -9.09696000  | -1.10950800 |

#### 40. [56]clarene

<2,2,24,2,2,24>

E(wB97XD/cc-pVDZ) = -8601.78244282  
 No imaginary frequency (B3LYP/6-31G\*)

|   |             |             |             |   |              |              |             |
|---|-------------|-------------|-------------|---|--------------|--------------|-------------|
| 6 | 11.09746500 | 23.85108400 | 0.22824900  | 6 | 14.93612000  | 20.75438400  | -0.99836500 |
| 6 | 10.24796400 | 24.95768200 | 0.49428600  | 6 | 15.51310800  | 19.49290500  | -0.88344200 |
| 6 | 8.86918100  | 24.73451000 | 0.55408100  | 6 | 16.79139400  | 19.38695000  | -0.27113100 |
| 6 | 8.32197200  | 23.44362100 | 0.43033300  | 6 | -8.32200800  | -23.44361000 | -0.43118700 |
| 6 | 9.19229700  | 22.32636800 | 0.29218500  | 6 | -9.19229500  | -22.32636900 | -0.29271400 |
| 6 | 10.55805100 | 22.57260300 | 0.16799000  | 6 | -10.55803300 | -22.57260300 | -0.16831900 |
| 6 | 15.34156000 | 24.26600600 | 0.28519700  | 6 | -11.09747400 | -23.85106600 | -0.22871400 |
| 6 | 14.52173800 | 25.37416100 | 0.56291900  | 6 | -10.24803100 | -24.95763100 | -0.49508900 |
| 6 | 13.12135100 | 25.29651200 | 0.47623100  | 6 | -8.86925600  | -24.73447200 | -0.55505900 |
| 6 | 12.53441200 | 24.05956500 | 0.10690300  | 6 | -12.53441000 | -24.05954500 | -0.10723600 |
| 6 | 13.35463200 | 23.02458200 | -0.30669400 | 6 | -13.35457300 | -23.02463500 | 0.30666200  |
| 6 | 14.73744000 | 23.08864100 | -0.22109200 | 6 | -14.73739200 | -23.08862500 | 0.22108900  |
| 6 | 17.47532000 | 20.56283000 | 0.09448200  | 6 | -15.34156800 | -24.26588700 | -0.28538100 |
| 6 | 16.85898600 | 21.81799900 | 0.02529500  | 6 | -14.52179200 | -25.37400700 | -0.56338000 |
| 6 | 15.52535900 | 21.88658200 | -0.45796000 | 6 | -13.12140300 | -25.29640300 | -0.47679000 |
|   |             |             |             | 6 | -14.93599800 | -20.75443600 | 0.99862300  |
|   |             |             |             | 6 | -15.51303100 | -19.49295200 | 0.88393800  |
|   |             |             |             | 6 | -16.79142600 | -19.38695500 | 0.27185800  |
|   |             |             |             | 6 | -17.47535000 | -20.56279900 | -0.09385800 |
|   |             |             |             | 6 | -16.85897000 | -21.81795800 | -0.02493800 |
|   |             |             |             | 6 | -15.52528800 | -21.88658900 | 0.45817000  |
|   |             |             |             | 6 | 15.14470100  | 17.06249500  | -0.69476300 |
|   |             |             |             | 6 | 14.73174700  | 18.30722900  | -1.18847600 |
|   |             |             |             | 6 | 13.49651800  | 18.39930700  | -1.88855000 |
|   |             |             |             | 6 | 12.64355200  | 17.34023100  | -1.96685200 |
|   |             |             |             | 6 | 12.94383200  | 16.10548800  | -1.32540000 |
|   |             |             |             | 6 | 14.21512500  | 15.95397400  | -0.72294000 |
|   |             |             |             | 6 | 12.26598900  | 13.85300000  | -0.56484700 |
|   |             |             |             | 6 | 11.96544300  | 15.03998600  | -1.25917100 |
|   |             |             |             | 6 | 10.67335600  | 15.16059900  | -1.85733200 |
|   |             |             |             | 6 | 9.75396200   | 14.15615700  | -1.79306100 |
|   |             |             |             | 6 | 10.01818700  | 12.94261800  | -1.09160800 |
|   |             |             |             | 6 | 11.26557500  | 12.81433300  | -0.44352900 |
|   |             |             |             | 6 | 9.32780200   | 10.72127000  | -0.25660400 |
|   |             |             |             | 6 | 9.05156100   | 11.86308000  | -1.03323300 |
|   |             |             |             | 6 | 7.82606700   | 11.88438700  | -1.76883400 |
|   |             |             |             | 6 | 6.97804200   | 10.81424800  | -1.78717000 |
|   |             |             |             | 6 | 7.23678500   | 9.63503800   | -1.02563800 |
|   |             |             |             | 6 | 8.38654300   | 9.62727200   | -0.21003900 |
|   |             |             |             | 6 | 6.62542100   | 7.38604900   | -0.20070000 |
|   |             |             |             | 6 | 6.36212800   | 8.47739100   | -1.05132900 |
|   |             |             |             | 6 | 5.23476600   | 8.37390700   | -1.92245000 |
|   |             |             |             | 6 | 4.46357300   | 7.24632900   | -1.97603800 |
|   |             |             |             | 6 | 4.72036000   | 6.11233700   | -1.14663700 |
|   |             |             |             | 6 | 5.78852800   | 6.21196700   | -0.23316700 |
|   |             |             |             | 6 | 4.21638400   | 3.83642600   | -0.31510000 |
|   |             |             |             | 6 | 3.93607300   | 4.88942700   | -1.20795600 |
|   |             |             |             | 6 | 2.88429700   | 4.67861900   | -2.15118000 |
|   |             |             |             | 6 | 2.18838300   | 3.50172300   | -2.21325600 |
|   |             |             |             | 6 | 2.45817400   | 2.41264000   | -1.32958500 |
|   |             |             |             | 6 | 3.47087100   | 2.60403400   | -0.36892400 |
|   |             |             |             | 6 | 2.07110200   | 0.12459400   | -0.46643600 |
|   |             |             |             | 6 | 1.74791500   | 1.14377000   | -1.38370800 |
|   |             |             |             | 6 | 0.72145900   | 0.85716100   | -2.33496200 |
|   |             |             |             | 6 | 0.07375900   | -0.34833200  | -2.36708700 |
|   |             |             |             | 6 | 0.38449800   | -1.40133000  | -1.45326300 |
|   |             |             |             | 6 | 1.39537900   | -1.14791900  | -0.50534400 |
|   |             |             |             | 6 | 0.09003200   | -3.67922000  | -0.52932500 |
|   |             |             |             | 6 | -0.28804800  | -2.69093500  | -1.45992600 |
|   |             |             |             | 6 | -1.34039800  | -3.02251600  | -2.36711700 |
|   |             |             |             | 6 | -1.97801000  | -4.23266200  | -2.32999400 |
|   |             |             |             | 6 | -1.61692800  | -5.25158200  | -1.39621700 |
|   |             |             |             | 6 | -0.55916700  | -4.96613100  | -0.51140800 |
|   |             |             |             | 6 | -1.81610300  | -7.51999800  | -0.42562100 |
|   |             |             |             | 6 | -2.28439100  | -6.54111100  | -1.32548900 |
|   |             |             |             | 6 | -3.42827500  | -6.87304500  | -2.11254000 |
|   |             |             |             | 6 | -4.07156300  | -8.07370900  | -1.98413100 |
|   |             |             |             | 6 | -3.59531700  | -9.09696000  | -1.10950800 |

|   |              |              |             |   |              |              |             |
|---|--------------|--------------|-------------|---|--------------|--------------|-------------|
| 6 | -2.43170500  | -8.82191500  | -0.36555700 | 6 | 5.43782100   | 12.99179000  | 0.73392400  |
| 6 | -3.59740100  | -11.41586500 | -0.25265000 | 6 | 4.15026200   | 12.74844400  | 0.22072400  |
| 6 | -4.23636400  | -10.39390400 | -0.98296400 | 6 | 3.59765000   | 11.41572000  | 0.25203900  |
| 6 | -5.51578900  | -10.68937000 | -1.54587100 | 6 | 4.23650400   | 10.39382100  | 0.98253800  |
| 6 | -6.10854500  | -11.91048500 | -1.38422100 | 6 | 5.51582500   | 10.68935700  | 1.54565000  |
| 6 | -5.43768300  | -12.99186600 | -0.73433700 | 6 | 7.91401400   | 15.83648900  | 0.75162500  |
| 6 | -4.15004000  | -12.74857600 | -0.22131600 | 6 | 7.09721900   | 16.96430200  | 0.42901800  |
| 6 | -5.20310700  | -15.39645800 | -0.19651800 | 6 | 5.72615500   | 16.74347300  | 0.20117400  |
| 6 | -6.01087100  | -14.31874300 | -0.61699100 | 6 | 5.20327400   | 15.39635200  | 0.19593800  |
| 6 | -7.38669600  | -14.58376900 | -0.88800900 | 6 | 6.01100600   | 14.31866800  | 0.61655500  |
| 6 | -7.91392300  | -15.83651800 | -0.75191600 | 6 | 7.38680400   | 14.58372900  | 0.88768900  |
| 6 | -7.09711600  | -16.96435400 | -0.42942500 | 6 | 9.51999400   | 19.83488200  | 0.32868900  |
| 6 | -5.72601900  | -16.74356700 | -0.20174700 | 6 | 8.66124300   | 20.97071900  | 0.29298800  |
| 6 | -6.75140800  | -19.41837200 | -0.24988100 | 6 | 7.27254400   | 20.76669600  | 0.28805100  |
| 6 | -7.62636300  | -18.31277300 | -0.36311800 | 6 | 6.75148200   | 19.41830900  | 0.24926200  |
| 6 | -9.02648600  | -18.56445400 | -0.39438000 | 6 | 7.62643800   | 18.31273400  | 0.36273100  |
| 6 | -9.51994600  | -19.83487700 | -0.32881800 | 6 | 9.02654800   | 18.56445600  | 0.39427300  |
| 6 | -8.66121000  | -20.97073400 | -0.29342900 | 6 | 6.90789100   | 23.18855300  | 0.45740900  |
| 6 | -7.27250500  | -20.76674100 | -0.28872500 | 6 | 6.41437900   | 21.92522000  | 0.35964300  |
| 6 | -12.64333700 | -17.34028500 | 1.96703500  | 6 | 12.22182800  | 26.39747300  | 0.76946000  |
| 6 | -12.94386200 | -16.10543700 | 1.32590200  | 6 | 10.87264400  | 26.24605800  | 0.73766800  |
| 6 | -14.21530900 | -15.95390000 | 0.72377600  | 6 | 17.46781700  | 23.05535600  | 0.48253500  |
| 6 | -15.14481000 | -17.06248200 | 0.69559600  | 6 | 16.76491900  | 24.21489600  | 0.56774000  |
| 6 | -14.73166400 | -18.30728100 | 1.18899400  | 6 | -6.41436800  | -21.92526700 | -0.36061100 |
| 6 | -13.49625900 | -18.39940100 | 1.88875000  | 6 | -6.90792700  | -23.18857400 | -0.45846800 |
| 6 | -9.75400100  | -14.15598500 | 1.79310800  | 6 | -12.22194200 | -26.39732900 | -0.77033600 |
| 6 | -10.01840100 | -12.94243100 | 1.09174900  | 6 | -10.87275300 | -26.24595000 | -0.73865300 |
| 6 | -11.26593800 | -12.81413500 | 0.44396100  | 6 | -17.46784500 | -23.05523100 | -0.48232600 |
| 6 | -12.26631300 | -13.85281800 | 0.56548000  | 6 | -16.76494300 | -24.21474700 | -0.56780600 |
| 6 | -11.96555700 | -15.03986200 | 1.25961300  | 6 | 17.27049300  | 18.06327900  | 0.02770200  |
| 6 | -10.67335300 | -15.16045700 | 1.85752300  | 6 | 16.47218300  | 16.97182400  | -0.13132800 |
| 6 | -6.97803400  | -10.81417100 | 1.78656200  | 6 | 14.50357000  | 14.70836200  | -0.08727400 |
| 6 | -7.23692900  | -9.63494200  | 1.02511500  | 6 | 13.57304700  | 13.71625100  | -0.00178200 |
| 6 | -8.38688500  | -9.62711300  | 0.20979200  | 6 | 11.50298900  | 11.64371400  | 0.33551500  |
| 6 | -9.32816900  | -10.72109500 | 0.25656900  | 6 | 10.57212400  | 10.65724700  | 0.44028100  |
| 6 | -9.05177700  | -11.86291000 | 1.03313500  | 6 | 8.59545500   | 8.52034900   | 0.66245000  |
| 6 | -7.82610200  | -11.88427500 | 1.76842900  | 6 | 7.74524100   | 7.46085400   | 0.67971100  |
| 6 | -4.46345600  | -7.24638000  | 1.97502700  | 6 | 6.02084900   | 5.13245100   | 0.66642200  |
| 6 | -4.72043100  | -6.11230900  | 1.14579300  | 6 | 5.26240000   | 4.00828700   | 0.63786700  |
| 6 | -5.78874400  | -6.21187200  | 0.23247700  | 6 | 3.74750400   | 1.55310700   | 0.55224200  |
| 6 | -6.62567600  | -7.38594300  | 0.20012400  | 6 | 3.07937500   | 0.37491600   | 0.50884300  |
| 6 | -6.36222400  | -8.47733600  | 1.05063600  | 6 | 1.73894200   | -2.17451100  | 0.42055700  |
| 6 | -5.23464900  | -8.37395500  | 1.92149300  | 6 | 1.12045800   | -3.38030200  | 0.40765300  |
| 6 | -2.18843300  | -3.50174700  | 2.21240500  | 6 | -0.14545900  | -5.97180500  | 0.40993900  |
| 6 | -2.45827300  | -2.41262200  | 1.32879800  | 6 | -0.73316100  | -7.19340100  | 0.44050500  |
| 6 | -3.47096300  | -2.60398900  | 0.36812300  | 6 | -1.86956300  | -9.85771300  | 0.43805800  |
| 6 | -4.21652000  | -3.83636200  | 0.31431800  | 6 | -2.40480700  | -11.10550000 | 0.46353300  |
| 6 | -3.93615400  | -4.88940200  | 1.20710500  | 6 | -3.39303000  | -13.84864600 | 0.28331400  |
| 6 | -2.88431000  | -4.67865500  | 2.15027300  | 6 | -3.87707600  | -15.11936900 | 0.24966100  |
| 6 | -0.07398800  | 0.34835700   | 2.36654500  | 6 | -4.87764400  | -17.87907200 | -0.01719900 |
| 6 | -0.38452600  | 1.40129300   | 1.45257500  | 6 | -5.35820400  | -19.15182500 | -0.08126200 |
| 6 | -1.39523400  | 1.14784200   | 0.50448400  | 6 | -16.47242100 | -16.97178300 | 0.13246900  |
| 6 | -2.07107300  | -0.12461400  | 0.46561900  | 6 | -17.27067800 | -18.06326300 | -0.02663200 |
| 6 | -1.74801100  | -1.14376000  | 1.38296500  | 6 | -13.57354100 | -13.71602400 | 0.00281700  |
| 6 | -0.72168000  | -0.85713500  | 2.33435600  | 6 | -14.50400300 | -14.70818300 | 0.08842300  |
| 6 | 1.97792300   | 4.23261500   | 2.32952700  | 6 | -10.57264800 | -10.65707000 | -0.44004500 |
| 6 | 1.61705600   | 5.25147400   | 1.39559000  | 6 | -11.50350600 | -11.64352400 | -0.33505300 |
| 6 | 0.55947800   | 4.96596600   | 0.51058400  | 6 | -7.74569600  | -7.46069300  | -0.68004200 |
| 6 | -0.08976500  | 3.67907300   | 0.52847400  | 6 | -8.59593900  | -8.52016700  | -0.66263300 |
| 6 | 0.28807700   | 2.69086700   | 1.45925500  | 6 | -5.26263100  | -4.00818500  | -0.63855500 |
| 6 | 1.34025900   | 3.02249900   | 2.36663200  | 6 | -6.02113600  | -5.13231400  | -0.66704200 |
| 6 | 4.07157300   | 8.07366200   | 1.98380100  | 6 | -3.07933000  | -0.37490900  | -0.50968000 |
| 6 | 3.59545500   | 9.09687200   | 1.10904900  | 6 | -3.74752700  | -1.55306300  | -0.55306000 |
| 6 | 2.43199800   | 8.82175600   | 0.36489100  | 6 | -1.11996100  | 3.38008900   | -0.40872900 |
| 6 | 1.81643500   | 7.51981500   | 0.42487700  | 6 | -1.73849400  | 2.17432500   | -0.42164500 |
| 6 | 2.28455100   | 6.54099000   | 1.32490100  | 6 | 0.73372300   | 7.19313900   | -0.44149800 |
| 6 | 3.42828500   | 6.87299200   | 2.11215100  | 6 | 0.14600700   | 5.97154900   | -0.41096300 |
| 6 | 6.10859000   | 11.91046900  | 1.38401000  | 6 | 2.40520100   | 11.10528300  | -0.46434800 |

6 1.86998500 9.85748500 -0.43889700  
6 3.87730300 15.11921400 -0.25038600  
6 3.39330200 13.84847500 -0.28406900  
6 5.35830600 19.15172000 0.08049000  
6 4.87778100 17.87895200 0.01646900  
1 8.19520600 25.57926200 0.71960500  
1 11.22713300 21.72762000 0.04846500  
1 14.98208700 26.30548700 0.90379000  
1 12.89235700 22.10261600 -0.63727200  
1 18.48125400 20.48245100 0.51507000  
1 13.94170100 20.83311500 -1.42367300  
1 -11.22709600 -21.72763400 -0.04855600  
1 -8.19532100 -25.57920400 -0.72085000  
1 -12.89224100 -22.10277100 0.63745900  
1 -14.98219100 -26.30525700 -0.90439000  
1 -13.94152300 -20.83320400 1.42379600  
1 -18.48134800 -20.48239500 -0.51428800  
1 13.21821300 19.32871300 -2.38370300  
1 11.71037200 17.46609700 -2.51205300  
1 10.39687800 16.07127200 -2.38516900  
1 8.78698200 14.31025900 -2.26871800  
1 7.55816500 12.76255200 -2.35409900  
1 6.06754700 10.88708000 -2.38045200  
1 4.97595700 9.20635100 -2.57538500  
1 3.62053300 7.23059000 -2.66619400  
1 2.62285600 5.46905500 -2.85377600  
1 1.40115000 3.40739700 -2.96101700  
1 0.43303100 1.61633100 -3.06144600  
1 -0.70294700 -0.49656700 -3.11705100  
1 -1.66512800 -2.29139500 -3.10680100  
1 -2.78218400 -4.41476300 -3.04253700  
1 -3.83365900 -6.14222900 -2.81114000  
1 -4.95976800 -8.25405200 -2.58952300  
1 -6.07042800 -9.90802300 -2.06594800  
1 -7.10862500 -12.05943400 -1.79080800  
1 -8.05293600 -13.76556900 -1.16115100  
1 -8.98010500 -15.96619000 -0.93193500  
1 -9.73156800 -17.73530400 -0.44119800  
1 -10.60112100 -19.96205900 -0.33914500  
1 -11.70999600 -17.46621200 2.51194800  
1 -13.21776000 -19.32888700 2.38364700  
1 -8.78692100 -14.31007500 2.26856800  
1 -10.39677200 -16.07112800 2.38530900  
1 -6.06740800 -10.88703900 2.37963500  
1 -7.55809700 -12.76245500 2.35362400  
1 -3.62026100 -7.23070300 2.66499000  
1 -4.97567800 -9.20646400 2.57428000  
1 -1.40112600 -3.40747400 2.96009200  
1 -2.62277500 -5.46915600 2.85275500  
1 0.70258400 0.49662500 3.11663900  
1 -0.43337300 -1.61627500 3.06091500  
1 2.78200700 4.41471900 3.04216800  
1 1.66485000 2.29141700 3.10641200  
1 4.95967000 8.25404100 2.58933600  
1 3.83356300 6.14222100 2.81085900  
1 7.10858100 12.05947300 1.79079100  
1 6.07039000 9.90805600 2.06587300  
1 8.98017700 15.96617400 0.93174700  
1 8.05303600 13.76554200 1.16089400  
1 10.60116400 19.96207400 0.33925300  
1 9.73164600 17.73533600 0.44136300  
1 6.22384100 24.03459600 0.55245400  
1 5.33374300 21.79016900 0.38107000  
1 12.65454600 27.37164000 1.00842400  
1 10.22496100 27.10126400 0.94373900  
1 18.52032100 23.03557300 0.77448100  
1 17.25757800 25.12382500 0.92061300  
1 -5.33373300 -21.79023200 -0.38219800

1 -6.22392000 -24.03462500 -0.55375200  
1 -12.65471700 -27.37143200 -1.00945900  
1 -10.22510100 -27.10112000 -0.94496700  
1 -18.52038000 -23.03540200 -0.77415600  
1 -17.25761500 -25.12362400 -0.92079000  
1 18.27078000 17.94788300 0.45064900  
1 16.85935200 15.99867000 0.16969500  
1 15.47808500 14.54594400 0.37127200  
1 13.85181900 12.79599000 0.50824300  
1 12.44145000 11.52617800 0.87385400  
1 10.81573200 9.78709200 1.04599300  
1 9.44126900 8.51224200 1.34656600  
1 7.95815900 6.64859700 1.37019100  
1 6.81227200 5.19420800 1.40910000  
1 5.48869000 3.22440500 1.35567000  
1 4.50382800 1.68000600 1.32197000  
1 3.33550200 -0.38208400 1.24486900  
1 2.51237100 -2.00893600 1.16531500  
1 1.42858500 -4.11773600 1.14372700  
1 0.66365300 -5.78009600 1.10932000  
1 -0.37172700 -7.91679200 1.16722000  
1 -0.96916200 -9.67558200 1.01970700  
1 -1.92266100 -11.86439000 1.07677800  
1 -2.38211500 -13.69083300 0.65421100  
1 -3.24310500 -15.92685000 0.61178100  
1 -3.80807800 -17.73888700 0.13018400  
1 -4.65633500 -19.97681000 0.03126800  
1 -16.85973200 -15.99858800 -0.16823800  
1 -18.27106800 -17.94785800 -0.44933200  
1 -13.85250900 -12.79567500 -0.50694200  
1 -15.47867300 -14.54570900 -0.36977000  
1 -10.81636300 -9.78694700 -1.04575600  
1 -12.44207000 -11.52600700 -0.87321900  
1 -7.95874300 -6.64839200 -1.37043100  
1 -9.44189100 -8.51202700 -1.34657800  
1 -5.48892800 -3.22429000 -1.35634200  
1 -6.81260000 -5.19406100 -1.40967800  
1 -3.33539800 0.38210000 -1.24571700  
1 -4.50381400 -1.67996700 -1.32282400  
1 -1.42781800 4.11743600 -1.14500400  
1 -2.51165600 2.00863700 -1.16665500  
1 0.37251800 7.91644900 -1.16840600  
1 -0.66291400 5.77976300 -1.11054200  
1 1.92316900 11.86411500 -1.07775200  
1 0.96971300 9.67527300 -1.02072100  
1 3.24335100 15.92667000 -0.61259300  
1 2.38244200 13.69062200 -0.65509800  
1 4.65642700 19.97668000 -0.03215700  
1 3.80823000 17.73873900 -0.13099300

#### 41. [58]clarene

<2,2,24,2,2,26>

E(wB97XD/cc-pVDZ) = -8908.99246626  
No imaginary frequency (B3LYP/6-31G\*)

6 13.55715700 23.98831100 2.36719000  
6 12.98971100 25.16509900 2.92424400  
6 11.62714500 25.40832200 2.71334200  
6 10.82246000 24.50535300 1.99097700  
6 11.43969000 23.41461700 1.32106100  
6 12.80502200 23.21240400 1.50013100  
6 17.27580200 22.50645200 3.86771300  
6 16.89494000 23.83718400 4.10944500  
6 15.66669600 24.34809800 3.65540100

|   |              |              |             |   |              |              |             |
|---|--------------|--------------|-------------|---|--------------|--------------|-------------|
| 6 | 14.85798800  | 23.52717900  | 2.83127100  | 6 | -1.96628900  | -4.63008200  | -1.62686200 |
| 6 | 15.23665900  | 22.21117700  | 2.60973000  | 6 | -3.08739400  | -7.24611200  | -1.46407300 |
| 6 | 16.37883200  | 21.66111200  | 3.16543800  | 6 | -3.63582300  | -6.20164300  | -0.69203700 |
| 6 | 18.11831000  | 18.33934500  | 3.30963600  | 6 | -4.72524300  | -6.53044200  | 0.17116600  |
| 6 | 17.88128500  | 19.70601700  | 3.47993500  | 6 | -5.20535600  | -7.80675300  | 0.27953000  |
| 6 | 16.62555700  | 20.22785800  | 3.06926000  | 6 | -4.63417200  | -8.89503600  | -0.44776400 |
| 6 | 15.62983500  | 19.35849200  | 2.64047500  | 6 | -3.57616700  | -8.59730300  | -1.33017500 |
| 6 | 15.83185700  | 17.98418400  | 2.52241500  | 6 | -4.37131600  | -11.30303100 | -0.94299400 |
| 6 | 17.12886400  | 17.47312300  | 2.80955600  | 6 | -5.07637300  | -10.27029400 | -0.29295100 |
| 6 | -6.43451200  | -23.55514100 | 2.54087200  | 6 | -6.20925400  | -10.64650700 | 0.49362700  |
| 6 | -7.54293900  | -22.68776100 | 2.32908300  | 6 | -6.58960700  | -11.95228300 | 0.63262900  |
| 6 | -8.82329400  | -23.20328100 | 2.52583500  | 6 | -5.82158600  | -13.02365400 | 0.07998800  |
| 6 | -9.04858500  | -24.50337300 | 2.96227600  | 6 | -4.68193400  | -12.68669300 | -0.67371200 |
| 6 | -7.94332500  | -25.33055100 | 3.29726500  | 6 | -5.19802400  | -15.41496900 | -0.03722700 |
| 6 | -6.65554300  | -24.84894700 | 3.04725500  | 6 | -6.13845700  | -14.42097800 | 0.30666100  |
| 6 | -10.40341100 | -25.00967400 | 3.14355500  | 6 | -7.38299400  | -14.84823000 | 0.86085100  |
| 6 | -11.48626000 | -24.29414700 | 2.66229300  | 6 | -7.65350200  | -16.16985600 | 1.07961600  |
| 6 | -12.79751500 | -24.62967600 | 2.96633100  | 6 | -6.67108300  | -17.18502600 | 0.85866100  |
| 6 | -13.04800900 | -25.74692500 | 3.80064400  | 6 | -5.42503700  | -16.79249900 | 0.33532800  |
| 6 | -11.96253300 | -26.55529500 | 4.17990500  | 6 | -5.83417000  | -19.50505400 | 1.15673200  |
| 6 | -10.63883300 | -26.21469500 | 3.85418100  | 6 | -6.90216700  | -18.57822000 | 1.19088900  |
| 6 | -13.64083200 | -22.68966100 | 1.69750200  | 6 | -8.19304200  | -19.05683000 | 1.55161500  |
| 6 | -14.51147600 | -21.61025500 | 1.57956800  | 6 | -8.40083400  | -20.36806100 | 1.86958700  |
| 6 | -15.71899800 | -21.62829300 | 2.32827900  | 6 | -7.32938300  | -21.30530300 | 1.92254800  |
| 6 | -16.04812900 | -22.78161800 | 3.06747300  | 6 | -6.03552700  | -20.86657400 | 1.59952800  |
| 6 | -15.14154000 | -23.83832600 | 3.21490100  | 6 | -12.37572000 | -19.26447000 | -0.40566500 |
| 6 | -13.87733100 | -23.73429100 | 2.57606900  | 6 | -12.91476600 | -17.99930000 | -0.03823300 |
| 6 | 15.03855000  | 15.73263400  | 1.87359700  | 6 | -14.13897000 | -17.97021000 | 0.67028400  |
| 6 | 14.75816600  | 17.08584500  | 2.12020400  | 6 | -14.75795600 | -19.20470300 | 1.10283100  |
| 6 | 13.41331800  | 17.53832900  | 1.99451400  | 6 | -14.08720900 | -20.41374100 | 0.87623400  |
| 6 | 12.39548200  | 16.68578600  | 1.67727500  | 6 | -12.93385800 | -20.42227000 | 0.04326300  |
| 6 | 12.64167000  | 15.31388300  | 1.38963200  | 6 | -10.27668100 | -15.61973100 | -1.28455100 |
| 6 | 13.97892800  | 14.85452500  | 1.43041500  | 6 | -10.78061700 | -14.34830200 | -0.87983300 |
| 6 | 11.87037900  | 13.10411900  | 0.59986700  | 6 | -12.00660000 | -14.31493900 | -0.18068500 |
| 6 | 11.56549300  | 14.40071700  | 1.05420400  | 6 | -12.74644900 | -15.53501000 | 0.06128000  |
| 6 | 10.18709800  | 14.75092700  | 1.20236800  | 6 | -12.21216700 | -16.77190100 | -0.34592400 |
| 6 | 9.18776900   | 13.84567100  | 0.97980900  | 6 | -10.95200700 | -16.77351200 | -1.01917200 |
| 6 | 9.46319300   | 12.53269000  | 0.49131200  | 6 | -8.25468900  | -11.90745900 | -2.26330300 |
| 6 | 10.80753700  | 12.20253200  | 0.21875700  | 6 | -8.71558300  | -10.65462200 | -1.75776000 |
| 6 | 8.72966300   | 10.36995000  | -0.44290700 | 6 | -9.83938100  | -10.66870900 | -0.90721100 |
| 6 | 8.42119600   | 11.55111800  | 0.25711400  | 6 | -10.55325600 | -11.89853000 | -0.65292000 |
| 6 | 7.08770100   | 11.69924800  | 0.74995600  | 6 | -10.06537500 | -13.11871500 | -1.15869900 |
| 6 | 6.15211200   | 10.71305600  | 0.60406600  | 6 | -8.87959500  | -13.08162500 | -1.95634100 |
| 6 | 6.42291000   | 9.52023000   | -0.13585700 | 6 | -6.35993300  | -8.10737600  | -3.25635800 |
| 6 | 7.69631600   | 9.40357700   | -0.72831400 | 6 | -6.76551200  | -6.89013200  | -2.62935400 |
| 6 | 5.75509400   | 7.36563200   | -1.15353100 | 6 | -7.83151700  | -6.95873300  | -1.70971000 |
| 6 | 5.45614900   | 8.44866900   | -0.30266900 | 6 | -8.48832200  | -8.21409300  | -1.43645400 |
| 6 | 4.20395500   | 8.41579100   | 0.38310000  | 6 | -8.05329600  | -9.39988500  | -2.06029100 |
| 6 | 3.34004200   | 7.36159500   | 0.26570400  | 6 | -6.96446500  | -9.30078200  | -2.97945900 |
| 6 | 3.62120200   | 6.24212400   | -0.57556100 | 6 | -4.37034900  | -4.28111700  | -3.95156100 |
| 6 | 4.82318400   | 6.27540500   | -1.31168900 | 6 | -4.78966300  | -3.09218200  | -3.27991900 |
| 6 | 3.09996100   | 4.01435500   | -1.52305000 | 6 | -5.91081100  | -3.18959000  | -2.43317800 |
| 6 | 2.74106400   | 5.09031000   | -0.68674700 | 6 | -6.55291100  | -4.46191700  | -2.20883300 |
| 6 | 1.50731900   | 4.97824800   | 0.02456300  | 6 | -6.11364100  | -5.61847800  | -2.88257200 |
| 6 | 0.71950100   | 3.86332900   | -0.05811900 | 6 | -5.00585200  | -5.47703000  | -3.77315300 |
| 6 | 1.08731900   | 2.73237600   | -0.84954100 | 6 | -2.23282200  | -0.48252200  | -4.24424300 |
| 6 | 2.28309000   | 2.82647300   | -1.58962200 | 6 | -2.68157100  | 0.67885900   | -3.54418800 |
| 6 | 0.75335800   | 0.42071300   | -1.67220100 | 6 | -3.87792600  | 0.56911700   | -2.80874400 |
| 6 | 0.30210600   | 1.51072200   | -0.90122300 | 6 | -4.58025600  | -0.68910400  | -2.73153800 |
| 6 | -0.92582800  | 1.34269300   | -0.19026900 | 6 | -4.09993500  | -1.82323000  | -3.41555700 |
| 6 | -1.61596200  | 0.16243200   | -0.20228200 | 6 | -2.90937100  | -1.66750100  | -4.1898100  |
| 6 | -1.15520700  | -0.97800800  | -0.92928300 | 6 | 0.00535400   | 3.26561900   | -4.15702500 |
| 6 | 0.02168900   | -0.82402500  | -1.68940300 | 6 | -0.44092400  | 4.37879900   | -3.38157700 |
| 6 | -1.33053000  | -3.33489600  | -1.66610100 | 6 | -1.67027000  | 4.24562900   | -2.70639200 |
| 6 | -1.83510400  | -2.26194000  | -0.90434000 | 6 | -2.43068600  | 3.02259800   | -2.79578500 |
| 6 | -3.00031300  | -2.51259700  | -0.11646100 | 6 | -1.94379700  | 1.92772700   | -3.53629700 |
| 6 | -3.58005800  | -3.74957500  | -0.05154400 | 6 | -0.70454500  | 2.10083000   | -4.22499700 |
| 6 | -3.07195800  | -4.86505800  | -0.78536800 | 6 | 2.31217500   | 6.95015800   | -3.71719400 |

|   |              |              |             |   |              |              |             |
|---|--------------|--------------|-------------|---|--------------|--------------|-------------|
| 6 | 1.88314900   | 7.99210200   | -2.83971300 | 6 | -12.47835700 | -13.05461500 | 0.29113000  |
| 6 | 0.65295300   | 7.81307000   | -2.17681500 | 6 | -9.59129400  | -8.28195300  | -0.53400800 |
| 6 | -0.13786800  | 6.62709800   | -2.39804400 | 6 | -10.24605700 | -9.44781100  | -0.29479400 |
| 6 | 0.33159600   | 5.59858400   | -3.23801100 | 6 | -7.62344500  | -4.57926300  | -1.27561200 |
| 6 | 1.58097200   | 5.81013700   | -3.89700300 | 6 | -8.23333300  | -5.76843200  | -1.03837300 |
| 6 | 4.67281800   | 10.54305300  | -2.93181300 | 6 | -5.75545400  | -0.81826700  | -1.93623100 |
| 6 | 4.20430500   | 11.55889800  | -2.04390300 | 6 | -6.38572900  | -2.01120800  | -1.78877900 |
| 6 | 2.94857400   | 11.36294700  | -1.43606600 | 6 | -3.67548300  | 2.88760000   | -2.11581200 |
| 6 | 2.18727800   | 10.16542000  | -1.69604900 | 6 | -4.36457500  | 1.71836100   | -2.12129500 |
| 6 | 2.66685800   | 9.18854800   | -2.59173100 | 6 | -1.40042700  | 6.46502200   | -1.75821300 |
| 6 | 3.93737000   | 9.42310400   | -3.19979800 | 6 | -2.13267700  | 5.33235700   | -1.90901100 |
| 6 | 6.98537100   | 14.11112600  | -1.95689900 | 6 | 0.94647200   | 9.93699300   | -1.03478100 |
| 6 | 6.40857500   | 15.18321400  | -1.20740700 | 6 | 0.21753500   | 8.81479600   | -1.26131100 |
| 6 | 5.09796400   | 15.01202800  | -0.72206900 | 6 | 3.12610700   | 13.52969200  | -0.34637400 |
| 6 | 4.39553100   | 13.77028500  | -0.94776600 | 6 | 2.44569400   | 12.37461800  | -0.56476100 |
| 6 | 4.95893300   | 12.76502900  | -1.75921400 | 6 | 5.11174800   | 17.29203800  | 0.13454200  |
| 6 | 6.28518900   | 12.97479600  | -2.24388100 | 6 | 4.47762600   | 16.10103200  | -0.03887600 |
| 6 | 9.12423900   | 17.78737400  | -1.10120500 | 6 | 7.12469500   | 21.05805600  | 0.71849400  |
| 6 | 8.47372600   | 18.90351000  | -0.49083300 | 6 | 6.46911600   | 19.88877800  | 0.47214100  |
| 6 | 7.12480600   | 18.76180700  | -0.11477500 | 1 | 11.15965000  | 26.27888200  | 3.18110100  |
| 6 | 6.44797000   | 17.49904800  | -0.31838000 | 1 | 13.26899300  | 22.35290300  | 1.02903600  |
| 6 | 7.10815300   | 16.42850200  | -0.95946900 | 1 | 17.55315000  | 24.47871300  | 4.70160000  |
| 6 | 8.47068000   | 16.61481500  | -1.33786200 | 1 | 14.58317600  | 21.56845100  | 2.03232900  |
| 6 | 11.25806200  | 21.37587900  | -0.11920800 | 1 | 19.09268700  | 17.92541600  | 3.58254200  |
| 6 | 10.64335800  | 22.41020900  | 0.63999800  | 1 | 14.64934600  | 19.75997900  | 2.40686900  |
| 6 | 9.25377900   | 22.39339000  | 0.81827600  | 1 | -9.67521200  | -22.55483500 | 2.35024800  |
| 6 | 8.51189500   | 21.21681900  | 0.41949900  | 1 | -5.79321400  | -25.48587900 | 3.26151500  |
| 6 | 9.17412600   | 20.14017400  | -0.21609900 | 1 | -11.29649400 | -23.40178000 | 2.07814300  |
| 6 | 10.55166000  | 20.29110000  | -0.54147300 | 1 | -12.14826600 | -27.45072000 | 4.77922800  |
| 6 | 9.38468900   | 24.56391400  | 1.96519800  | 1 | -12.69710000 | -22.65614800 | 1.16445700  |
| 6 | 8.64629100   | 23.54163900  | 1.45110800  | 1 | -17.00374800 | -22.81775400 | 3.59732000  |
| 6 | 15.12839000  | 25.64027200  | 4.04137200  | 1 | 13.16415000  | 18.58065600  | 2.18700100  |
| 6 | 13.85702600  | 26.00572800  | 3.73151000  | 1 | 11.38313700  | 17.08420100  | 1.61872800  |
| 6 | 18.82932000  | 20.62047200  | 4.09095500  | 1 | 9.90951200   | 15.74905300  | 1.53836400  |
| 6 | 18.53032500  | 21.92648000  | 4.31015600  | 1 | 8.15576500   | 14.15924200  | 1.13827300  |
| 6 | -4.94049800  | -21.79254600 | 1.76249300  | 1 | 6.80707900   | 12.60449600  | 1.28819200  |
| 6 | -5.12297900  | -23.05323400 | 2.23686100  | 1 | 5.16060200   | 10.87366600  | 1.02740700  |
| 6 | -9.48187700  | -27.01180100 | 4.21729500  | 1 | 3.92531400   | 9.24170400   | 1.03703500  |
| 6 | -8.21887400  | -26.61350700 | 3.91876100  | 1 | 2.40699300   | 7.39602900   | 0.82690000  |
| 6 | -15.38042800 | -25.01547800 | 4.03213300  | 1 | 1.16799100   | 5.80343200   | 0.64994300  |
| 6 | -14.40814200 | -25.93312300 | 4.27393800  | 1 | -0.21262500  | 3.84928800   | 0.50526600  |
| 6 | 17.36223300  | 16.07327300  | 2.58467400  | 1 | -1.33881500  | 2.17479600   | 0.37881600  |
| 6 | 16.38110700  | 15.25964200  | 2.11218600  | 1 | -2.54858600  | 0.10567200   | 0.35784700  |
| 6 | 14.23873600  | 13.51502500  | 1.00814600  | 1 | -3.44699600  | -1.70442000  | 0.46128300  |
| 6 | 13.24020300  | 12.69730700  | 0.57440000  | 1 | -4.46359100  | -3.87209000  | 0.57413700  |
| 6 | 11.08558600  | 10.97187300  | -0.44605900 | 1 | -5.20045800  | -5.75013300  | 0.76433800  |
| 6 | 10.08765600  | 10.12070900  | -0.80551700 | 1 | -6.03929600  | -7.98868900  | 0.95677000  |
| 6 | 7.94493900   | 8.31316900   | -1.61149600 | 1 | -6.82124300  | -9.87694200  | 0.96389800  |
| 6 | 7.00847500   | 7.35564600   | -1.83467500 | 1 | -7.48647800  | -12.17197700 | 1.21162700  |
| 6 | 5.10929500   | 5.19829900   | -2.20068100 | 1 | -8.15993900  | -14.11490600 | 1.07741100  |
| 6 | 4.29018800   | 4.12125000   | -2.29978200 | 1 | -8.63509300  | -16.43459300 | 1.47025600  |
| 6 | 2.68341200   | 1.71280000   | -2.38382300 | 1 | -9.04737600  | -18.38072400 | 1.55116100  |
| 6 | 1.95795600   | 0.56638500   | -2.41952400 | 1 | -9.41422100  | -20.67742300 | 2.12042700  |
| 6 | 0.48452000   | -1.92932600  | -2.46076500 | 1 | -11.49155700 | -19.32559200 | -1.03685500 |
| 6 | -0.16231100  | -3.12252800  | -2.45418100 | 1 | -12.48178300 | -21.36794500 | -0.25294600 |
| 6 | -1.48383700  | -5.70075900  | -2.43447700 | 1 | -9.31544000  | -15.68883400 | -1.79076100 |
| 6 | -2.02089200  | -6.94470700  | -2.36075800 | 1 | -10.49727700 | -17.71222700 | -1.32958100 |
| 6 | -2.98109100  | -9.66271600  | -2.06905300 | 1 | -7.35724400  | -11.94630200 | -2.87926800 |
| 6 | -3.34363200  | -10.95551100 | -1.86698100 | 1 | -8.45843600  | -14.00537400 | -2.34966600 |
| 6 | -3.81114300  | -13.73156300 | -1.10703700 | 1 | -5.53267000  | -8.10260000  | -3.96468000 |
| 6 | -4.03234100  | -15.02830800 | -0.76208900 | 1 | -6.59453100  | -10.19398100 | -3.48089700 |
| 6 | -4.39090100  | -17.77373800 | 0.23365800  | 1 | -3.51316100  | -4.24983900  | -4.62282700 |
| 6 | -4.57262500  | -19.05322400 | 0.66222700  | 1 | -4.62781600  | -6.34562100  | -4.31037100 |
| 6 | -16.01309100 | -19.25997700 | 1.81669700  | 1 | -1.31347200  | -0.44226000  | -4.82675700 |
| 6 | -16.49188400 | -20.41455200 | 2.35757000  | 1 | -2.49942900  | -2.52000200  | -4.72888300 |
| 6 | -14.01569100 | -15.53646400 | 0.71977200  | 1 | 0.95337000   | 3.32216900   | -4.69007000 |
| 6 | -14.68075400 | -16.69190700 | 1.00389600  | 1 | -0.29062100  | 1.28017100   | -4.80932800 |
| 6 | -11.77612100 | -11.90803300 | 0.08330900  | 1 | 3.26026800   | 7.04192000   | -4.24504000 |

1 1.97983400 5.04346700 -4.56000400  
1 5.64155400 10.65178300 -3.41755000  
1 4.35389800 8.68621300 -3.88516200  
1 8.00446700 14.19495600 -2.33099300  
1 6.77888300 12.19731600 -2.82545700  
1 10.17207000 17.85298700 -1.38767900  
1 9.02416900 15.79876200 -1.79914900  
1 12.31348800 21.44403400 -0.37973600  
1 11.07021100 19.52609900 -1.11573400  
1 8.88348800 25.41690300 2.42777400  
1 7.56016800 23.60389800 1.51525400  
1 15.75008000 26.30076200 4.65015200  
1 13.45972900 26.95454700 4.09927900  
1 19.79314900 20.22126100 4.41493400  
1 19.25089200 22.57275600 4.81652800  
1 -3.92506100 -21.46509700 1.54360900  
1 -4.26279200 -23.70933800 2.38615600  
1 -9.64673700 -27.96280100 4.72887200  
1 -7.37090100 -27.24886300 4.18438400  
1 -16.37466800 -25.15097200 4.46397100  
1 -14.62755600 -26.80643300 4.89245600  
1 18.35430900 15.66687600 2.79276100  
1 16.61415800 14.20749700 1.95413300  
1 15.25933700 13.13561500 0.99968100  
1 13.50160700 11.69111500 0.25122300  
1 12.10969800 10.71369100 -0.70985600  
1 10.35401800 9.20332300 -1.32671400  
1 8.89118600 8.24789900 -2.14525800  
1 7.25288600 6.55585700 -2.52922800  
1 6.00243500 5.21728800 -2.82027000  
1 4.56712800 3.33308900 -2.99544100  
1 3.60130600 1.75179700 -2.96496500  
1 2.32961200 -0.25178700 -3.03119800  
1 1.38083200 -1.83979700 -3.06943700  
1 0.25294800 -3.92946400 -3.05274200  
1 -0.66809500 -5.53828600 -3.13466400  
1 -1.60497600 -7.71736100 -3.00258500  
1 -2.19913500 -9.46057800 -2.79673500  
1 -2.84655200 -11.73039000 -2.44748800  
1 -2.91327100 -13.49412700 -1.67418600  
1 -3.31454900 -15.78136600 -1.08255000  
1 -3.41024500 -17.49151100 -0.14565200  
1 -3.73528700 -19.74592300 0.59382900  
1 -16.60730700 -18.35271400 1.92375900  
1 -17.44943400 -20.41197300 2.88281500  
1 -14.47706100 -14.59549700 1.01383400  
1 -15.63528800 -16.62622900 1.52451000  
1 -12.18932300 -10.97829400 0.46848200  
1 -13.41401700 -12.99277200 0.84336300  
1 -9.94474000 -7.38700800 -0.02804700  
1 -11.08455300 -9.43403300 0.39815200  
1 -7.96805800 -3.71003600 -0.72093600  
1 -9.03832100 -5.79164200 -0.30812100  
1 -6.16806400 0.04375400 -1.41806000  
1 -7.27694800 -2.04370700 -1.16701100  
1 -4.10102100 3.72764500 -1.57257200  
1 -5.30782300 1.68010000 -1.58214700  
1 -1.80897700 7.25704700 -1.13565000  
1 -3.08781900 5.27031200 -1.39348500  
1 0.56075200 10.65969500 -0.32013200  
1 -0.71454300 8.69397500 -0.71503700  
1 2.68668500 14.26714300 0.32184200  
1 1.48659500 12.24774900 -0.06899000  
1 4.57735400 18.09067500 0.64524100  
1 3.45835500 16.00594700 0.32928300  
1 6.57285700 21.87418200 1.18312800  
1 5.41529100 19.82723400 0.73758600

## 42. [58]clarene

<2,4,22,4,2,24>

E(wB97XD/cc-pVDZ) = -8908.92152842  
No imaginary frequency (B3LYP/6-31G\*)

6 9.67824000 24.97215600 -0.43621400  
6 9.01198100 26.22443400 -0.58948300  
6 7.62238800 26.24843600 -0.67533800  
6 6.85521300 25.07765100 -0.60307400  
6 7.50806100 23.82706100 -0.42552300  
6 8.90799000 23.81609400 -0.35247900  
6 13.97119300 24.95949400 -0.21553800  
6 13.25427300 26.15765100 -0.33276600  
6 11.86402900 26.17846800 -0.41591400  
6 11.14590700 24.94715000 -0.36786400  
6 11.86735100 23.76130400 -0.26294900  
6 13.26631700 23.72559000 -0.19021300  
6 18.32518400 17.59974400 0.40998400  
6 17.61913400 18.80043800 0.31190500  
6 16.20055300 18.76925400 0.17891900  
6 15.56637100 17.52511500 0.13370500  
6 16.26271100 16.31596900 0.22076700  
6 17.67916600 16.36137900 0.37142800  
6 -5.33156300 -23.49332100 0.37984900  
6 -5.99929100 -22.24439600 0.22030200  
6 -7.39454200 -22.24532900 0.13165800  
6 -8.15596100 -23.41564600 0.18339100  
6 -7.47468900 -24.65950800 0.32393400  
6 -6.08195600 -24.67112600 0.42395000  
6 -13.91601800 -23.35030900 -0.17941200  
6 -14.64611700 -22.15648900 -0.25318100  
6 -16.03403400 -22.12434300 -0.35515900  
6 -16.74210200 -23.36160200 -0.39854900  
6 -16.02928400 -24.55527000 -0.31408900  
6 -14.63294800 -24.57736300 -0.19983400  
6 -16.17162900 -19.62075200 -0.34632900  
6 -16.88061600 -18.41357800 -0.41892600  
6 -18.29092600 -18.47299600 -0.58985500  
6 -18.92236100 -19.72252700 -0.65742400  
6 -18.20716800 -20.91420900 -0.57233400  
6 -16.78897000 -20.86558900 -0.42442900  
6 16.15267300 21.25750600 0.10817700  
6 15.42059600 22.49582000 0.00400100  
6 14.01333600 22.47687300 -0.09145100  
6 13.35518300 21.22118500 -0.09425400  
6 14.05034000 20.04838200 -0.01155300  
6 15.46416200 20.02788700 0.09065500  
6 16.33755900 13.83201400 0.27494400  
6 15.59328800 15.02016300 0.16232700  
6 14.18613300 14.92195900 -0.01367900  
6 13.55215900 13.71643300 -0.07710400  
6 14.26706200 12.49181800 0.03787500  
6 15.66625100 12.55281900 0.22132900  
6 14.32140700 10.01441200 0.11005000  
6 13.59202600 11.21174800 -0.02772200  
6 12.18359600 11.12125500 -0.23433700  
6 11.54419200 9.92121100 -0.29881400  
6 12.24627500 8.68779200 -0.15556400  
6 13.63976500 8.73713400 0.05370000  
6 12.27771000 6.21188900 -0.05265500  
6 11.56105800 7.41447900 -0.21714500  
6 10.15466900 7.33344300 -0.44386600  
6 9.50520300 6.13860700 -0.49916300  
6 10.19360700 4.90063200 -0.32732300  
6 11.58466700 4.93995200 -0.10185000  
6 10.20023400 2.42648500 -0.18569700

|   |              |              |             |   |              |              |             |
|---|--------------|--------------|-------------|---|--------------|--------------|-------------|
| 6 | 9.49670300   | 3.63318300   | -0.37553600 | 6 | -10.95843300 | -4.47935100  | 0.29578100  |
| 6 | 8.09130400   | 3.56184800   | -0.61193600 | 6 | -10.25124900 | -5.68177200  | 0.49860100  |
| 6 | 7.43027400   | 2.37269100   | -0.65011000 | 6 | -8.85374700  | -5.60132600  | 0.77534200  |
| 6 | 8.10509300   | 1.13114200   | -0.45177000 | 6 | -6.11810600  | -0.64704000  | 0.98687200  |
| 6 | 9.49530100   | 1.16059300   | -0.21986000 | 6 | -6.78117000  | 0.59309700   | 0.74479800  |
| 6 | 8.08662800   | -1.34017300  | -0.26803300 | 6 | -8.16478100  | 0.56498600   | 0.47620100  |
| 6 | 7.39553900   | -0.12988600  | -0.47957400 | 6 | -8.87382800  | -0.69863500  | 0.44413000  |
| 6 | 5.98954400   | -0.19105900  | -0.71535700 | 6 | -8.18115700  | -1.90441700  | 0.67522100  |
| 6 | 5.31609400   | -1.37375000  | -0.73079000 | 6 | -6.78318000  | -1.83405300  | 0.95243200  |
| 6 | 5.97818600   | -2.61843500  | -0.51035700 | 6 | -3.98559200  | 3.08951200   | 1.03283300  |
| 6 | 7.36910800   | -2.59934600  | -0.28171400 | 6 | -4.63536100  | 4.33214100   | 0.76846600  |
| 6 | 5.93507700   | -5.08610900  | -0.28610300 | 6 | -6.02154500  | 4.31542200   | 0.51253300  |
| 6 | 5.25536600   | -3.87220100  | -0.51322100 | 6 | -6.74555800  | 3.05991700   | 0.51048900  |
| 6 | 3.84715700   | -3.92219700  | -0.73819800 | 6 | -6.06607700  | 1.85113000   | 0.76401000  |
| 6 | 3.16096600   | -5.09758800  | -0.72811900 | 6 | -4.66552900  | 1.91045000   | 1.03067500  |
| 6 | 3.81163600   | -6.34559200  | -0.49290900 | 6 | -1.80528300  | 6.79793700   | 0.96847800  |
| 6 | 5.20464700   | -6.33787800  | -0.27668300 | 6 | -2.44366700  | 8.04362800   | 0.69111800  |
| 6 | 3.74518200   | -8.80952600  | -0.23545300 | 6 | -3.83375800  | 8.03986200   | 0.45683900  |
| 6 | 3.07554600   | -7.59137300  | -0.46974600 | 6 | -4.57263100  | 6.79336300   | 0.48574500  |
| 6 | 1.66396400   | -7.62882500  | -0.67510400 | 6 | -3.90469900  | 5.58123700   | 0.75365900  |
| 6 | 0.96540000   | -8.79640700  | -0.64040400 | 6 | -2.49986600  | 5.62787000   | 0.99948100  |
| 6 | 1.60614100   | -10.04856200 | -0.40012700 | 6 | 0.42013800   | 10.47575200  | 0.79908800  |
| 6 | 3.00208800   | -10.05346600 | -0.20377100 | 6 | -0.20866700  | 11.72584800  | 0.51977600  |
| 6 | 1.51816500   | -12.50966300 | -0.12228200 | 6 | -1.60317500  | 11.73662600  | 0.31378400  |
| 6 | 0.85740600   | -11.28610600 | -0.35383700 | 6 | -2.35609800  | 10.49951100  | 0.37083900  |
| 6 | -0.55793900  | -11.30967300 | -0.53337600 | 6 | -1.69805000  | 9.28298800   | 0.64331500  |
| 6 | -1.26798800  | -12.46952100 | -0.47865000 | 6 | -0.28807600  | 9.31511800   | 0.86027200  |
| 6 | -0.63588600  | -13.72710100 | -0.24436300 | 6 | 2.68604800   | 14.12307700  | 0.54213700  |
| 6 | 0.76312600   | -13.74579000 | -0.07287500 | 6 | 2.06549300   | 15.37938500  | 0.27279800  |
| 6 | -0.74356600  | -16.18740400 | 0.03653200  | 6 | 0.66690100   | 15.40599200  | 0.09898100  |
| 6 | -1.39632800  | -14.95683800 | -0.18156400 | 6 | -0.09884400  | 14.17796800  | 0.17776200  |
| 6 | -2.81479700  | -14.96581100 | -0.33198000 | 6 | 0.55063900   | 12.95541900  | 0.44395900  |
| 6 | -3.53502000  | -16.11900000 | -0.26514900 | 6 | 1.96563900   | 12.97150900  | 0.62700800  |
| 6 | -2.91053000  | -17.38300600 | -0.04856900 | 6 | 4.98691000   | 17.74329500  | 0.22565400  |
| 6 | -1.50954400  | -17.41580900 | 0.09572000  | 6 | 4.37381600   | 19.00735000  | -0.02155000 |
| 6 | -3.03705300  | -19.84825600 | 0.21455000  | 6 | 2.97259200   | 19.05005800  | -0.16198800 |
| 6 | -3.68242200  | -18.60684400 | 0.02095900  | 6 | 2.19535700   | 17.83054800  | -0.07115600 |
| 6 | -5.09995900  | -18.59995300 | -0.09973900 | 6 | 2.83704600   | 16.59998600  | 0.17747300  |
| 6 | -5.82793600  | -19.75085500 | -0.03129200 | 6 | 4.25593500   | 16.59934800  | 0.32468000  |
| 6 | -5.21080500  | -21.01773500 | 0.15554800  | 6 | 7.31511800   | 21.34301100  | -0.11473000 |
| 6 | -3.81011100  | -21.06840900 | 0.27283800  | 6 | 6.70944800   | 22.61221500  | -0.32678400 |
| 6 | -9.61419600  | -23.40667200 | 0.09524600  | 6 | 5.30775500   | 22.67519800  | -0.43439600 |
| 6 | -10.33815900 | -22.19257500 | -0.01257600 | 6 | 4.52282100   | 21.46371200  | -0.34417000 |
| 6 | -11.70153700 | -22.17634100 | -0.09355800 | 6 | 5.15704600   | 20.22120300  | -0.12499800 |
| 6 | -12.46086000 | -23.37348700 | -0.08369200 | 6 | 6.57589100   | 20.20240500  | -0.01333200 |
| 6 | -11.77427400 | -24.60176300 | 0.01590000  | 6 | 5.42411400   | 25.10315600  | -0.70075800 |
| 6 | -10.33575300 | -24.61713100 | 0.11914600  | 6 | 4.69174200   | 23.96314300  | -0.62670400 |
| 6 | -14.20423100 | -15.79475200 | -0.02457100 | 6 | 11.13740700  | 27.42294000  | -0.55645700 |
| 6 | -14.93004100 | -14.57520400 | -0.13308500 | 6 | 9.79031600   | 27.44396900  | -0.64704400 |
| 6 | -16.32431000 | -14.64671800 | -0.34511700 | 6 | 18.28352100  | 20.07462600  | 0.33892200  |
| 6 | -16.98207000 | -15.93201600 | -0.43079300 | 6 | 17.59081300  | 21.23475200  | 0.23654000  |
| 6 | -16.22667300 | -17.11470300 | -0.32571100 | 6 | -3.18057300  | -22.35480500 | 0.44404600  |
| 6 | -14.82347100 | -17.00507300 | -0.12157400 | 6 | -3.89948600  | -23.50331000 | 0.48981900  |
| 6 | -12.24095400 | -11.98482300 | 0.30384000  | 6 | -13.90013000 | -25.80810800 | -0.10477000 |
| 6 | -12.95116700 | -10.75609000 | 0.15998000  | 6 | -12.54818600 | -25.81887500 | 0.00332500  |
| 6 | -14.33872400 | -10.81516000 | -0.08306400 | 6 | -18.87500900 | -22.19780400 | -0.62527400 |
| 6 | -15.00714100 | -12.09778200 | -0.17065900 | 6 | -18.18353300 | -23.35410900 | -0.53493400 |
| 6 | -14.26939200 | -13.29019200 | -0.03338000 | 6 | 16.08849500  | 23.77413700  | -0.01370300 |
| 6 | -12.86700100 | -13.18962100 | 0.20734400  | 6 | 15.40362200  | 24.93971000  | -0.12311900 |
| 6 | -10.24257100 | -8.18790800  | 0.60240800  | 6 | 18.40369600  | 15.12576000  | 0.47788700  |
| 6 | -10.93649200 | -6.95415100  | 0.42268100  | 6 | 17.76754200  | 13.92925700  | 0.43667600  |
| 6 | -12.32072500 | -7.00264600  | 0.16004300  | 6 | 16.37221300  | 11.31618500  | 0.35042300  |
| 6 | -13.00181500 | -8.27965200  | 0.08257200  | 6 | 15.73398900  | 10.11338100  | 0.30187900  |
| 6 | -12.27920000 | -9.47778000  | 0.25334900  | 6 | 14.33417000  | 7.49898700   | 0.20764200  |
| 6 | -10.88008300 | -9.38742800  | 0.51822400  | 6 | 13.68679800  | 6.30006900   | 0.16061000  |
| 6 | -8.20298500  | -4.40757600  | 0.83794600  | 6 | 12.26583100  | 3.69800200   | 0.07682100  |
| 6 | -8.88091100  | -3.17018300  | 0.62483700  | 6 | 11.60788100  | 2.50447400   | 0.03958200  |
| 6 | -10.26381800 | -3.20862800  | 0.35384200  | 6 | 10.16368400  | -0.08485600  | -0.01888500 |



|   |              |              |             |   |              |              |             |
|---|--------------|--------------|-------------|---|--------------|--------------|-------------|
| 6 | 9.49437700   | -1.27242100  | -0.04024200 | 1 | -6.90950800  | -19.67903800 | -0.13001600 |
| 6 | 8.02551900   | -3.84821900  | -0.06326200 | 1 | -9.81229800  | -21.23977000 | -0.02753200 |
| 6 | 7.34438300   | -5.02922400  | -0.06506700 | 1 | -12.19897900 | -21.21159400 | -0.17340300 |
| 6 | 5.85019700   | -7.59058800  | -0.04797800 | 1 | -13.12823700 | -15.78085900 | 0.13550400  |
| 6 | 5.15720000   | -8.76454600  | -0.02943200 | 1 | -14.21308100 | -17.90174500 | -0.03128200 |
| 6 | 3.63791600   | -11.31093900 | 0.02621300  | 1 | -11.16927400 | -11.97880700 | 0.49135500  |
| 6 | 2.93349300   | -12.47768800 | 0.06263100  | 1 | -12.26606800 | -14.08893600 | 0.32497200  |
| 6 | 1.39019200   | -15.00941600 | 0.14825800  | 1 | -9.17431900  | -8.18994400  | 0.80860900  |
| 6 | 0.67519800   | -16.16922800 | 0.19684300  | 1 | -10.29133700 | -10.29080600 | 0.66325600  |
| 6 | -0.89035900  | -18.68778800 | 0.29747500  | 1 | -7.13664500  | -4.41719100  | 1.05366700  |
| 6 | -1.61365400  | -19.84128700 | 0.34950500  | 1 | -8.27667700  | -6.50783200  | 0.94562900  |
| 6 | -9.59778200  | -25.85107500 | 0.25378000  | 1 | -5.05206200  | -0.66425600  | 1.20362900  |
| 6 | -8.24680600  | -25.87124800 | 0.35693600  | 1 | -6.21698500  | -2.74308800  | 1.14437400  |
| 6 | -18.40647900 | -16.04209200 | -0.61581500 | 1 | -2.91827300  | 3.06395300   | 1.24238200  |
| 6 | -19.02841000 | -17.24616600 | -0.68561700 | 1 | -4.10906800  | 0.99899100   | 1.23892100  |
| 6 | -16.41419700 | -12.20729300 | -0.39339300 | 1 | -0.73538400  | 6.76283100   | 1.16295000  |
| 6 | -17.03965600 | -13.41549200 | -0.47091500 | 1 | -1.95175800  | 4.71343700   | 1.21667500  |
| 6 | -14.40450800 | -8.37755200  | -0.16566800 | 1 | 1.49328400   | 10.42973900  | 0.97221800  |
| 6 | -15.04019400 | -9.58140000  | -0.24001200 | 1 | 0.25304000   | 8.39664700   | 1.07796500  |
| 6 | -12.35901300 | -4.56655100  | 0.03294500  | 1 | 3.76241800   | 14.06500200  | 0.68973400  |
| 6 | -13.00666200 | -5.76475300  | -0.02825700 | 1 | 2.50075000   | 12.04759600  | 0.83634000  |
| 6 | -10.27427000 | -0.77541000  | 0.17749500  | 1 | 6.06589200   | 17.67249700  | 0.34603700  |
| 6 | -10.93487700 | -1.96734300  | 0.13671800  | 1 | 4.78574300   | 15.66869200  | 0.51688400  |
| 6 | -8.14778300  | 2.99406400   | 0.25039900  | 1 | 8.39658800   | 21.26262500  | -0.02156600 |
| 6 | -8.82201500  | 1.80920800   | 0.23493800  | 1 | 7.10120000   | 19.26428700  | 0.15274400  |
| 6 | -5.97827900  | 6.73961600   | 0.24181700  | 1 | 4.92739700   | 26.06572700  | -0.83914800 |
| 6 | -6.66634000  | 5.56269100   | 0.25398000  | 1 | 3.60874500   | 24.03672800  | -0.70806100 |
| 6 | -3.76616000  | 10.45937000  | 0.15086400  | 1 | 11.71020100  | 28.35198700  | -0.59433000 |
| 6 | -4.46764200  | 9.29094500   | 0.18977100  | 1 | 9.25694200   | 28.39018700  | -0.76028600 |
| 6 | -1.51352000  | 14.15277300  | -0.01314000 | 1 | 19.37052900  | 20.09270000  | 0.44148700  |
| 6 | -2.22749700  | 12.99286700  | 0.04827000  | 1 | 18.14507300  | 22.17106500  | 0.26053100  |
| 6 | 0.77643300   | 17.82115100  | -0.23067200 | 1 | -2.09756900  | -22.41761500 | 0.53330400  |
| 6 | 0.05118500   | 16.66918300  | -0.15411900 | 1 | -3.39315000  | -24.46279000 | 0.61395600  |
| 6 | 3.09911300   | 21.46770700  | -0.47276000 | 1 | -14.45567700 | -26.74812300 | -0.11927700 |
| 6 | 2.36486400   | 20.32261500  | -0.39159100 | 1 | -12.04378500 | -26.78068600 | 0.07324500  |
| 1 | 7.11314500   | 27.20746900  | -0.80087600 | 1 | -19.96153200 | -22.20864500 | -0.73485500 |
| 1 | 9.41385200   | 22.86396100  | -0.22340100 | 1 | -18.70235000 | -24.31447900 | -0.56946400 |
| 1 | 13.80367800  | 27.10216800  | -0.36215600 | 1 | 17.17386700  | 23.81744700  | 0.05363800  |
| 1 | 11.32154700  | 22.82287100  | -0.23901000 | 1 | 15.94047200  | 25.89046800  | -0.14123200 |
| 1 | 19.41243700  | 17.62920600  | 0.51828800  | 1 | 19.48859800  | 15.16637600  | 0.59507300  |
| 1 | 14.48690000  | 17.49584500  | 0.02400700  | 1 | 18.36355400  | 13.02250600  | 0.52250300  |
| 1 | -7.90774200  | -21.29596000 | 0.01591100  | 1 | 17.45074100  | 11.31705400  | 0.49666900  |
| 1 | -5.56478600  | -25.62719800 | 0.53872500  | 1 | 16.33290000  | 9.21074600   | 0.41003300  |
| 1 | -14.10611300 | -21.21462000 | -0.23150100 | 1 | 15.41023900  | 7.49475000   | 0.37228500  |
| 1 | -16.57307600 | -25.50314600 | -0.33954200 | 1 | 14.27604500  | 5.39372200   | 0.28868200  |
| 1 | -15.09348600 | -19.58364600 | -0.22199600 | 1 | 13.34003400  | 3.68627500   | 0.25285500  |
| 1 | -20.00807300 | -19.76053200 | -0.77833100 | 1 | 12.18728400  | 1.59471200   | 0.18678400  |
| 1 | 12.27056600  | 21.17054400  | -0.16950600 | 1 | 11.23708400  | -0.10418200  | 0.16130900  |
| 1 | 13.48742600  | 19.11691100  | -0.02104700 | 1 | 10.06440400  | -2.18526600  | 0.12348400  |
| 1 | 13.58286500  | 15.82303300  | -0.10760900 | 1 | 9.09925200   | -3.87562900  | 0.11389400  |
| 1 | 12.47315200  | 13.71175700  | -0.21616900 | 1 | 7.90579500   | -5.94516000  | 0.11072300  |
| 1 | 11.58825500  | 12.02451600  | -0.35019500 | 1 | 6.92524500   | -7.62689800  | 0.11938100  |
| 1 | 10.46837100  | 9.92309700   | -0.46099700 | 1 | 5.71092700   | -9.68402100  | 0.15221300  |
| 1 | 9.56952700   | 8.24028800   | -0.58166700 | 1 | 4.71484900   | -11.35707900 | 0.17840700  |
| 1 | 8.43185600   | 6.14780700   | -0.67677000 | 1 | 3.48043800   | -13.40149900 | 0.24288600  |
| 1 | 7.51610900   | 4.47176800   | -0.76989000 | 1 | 2.46911800   | -15.06610300 | 0.28172200  |
| 1 | 6.35830500   | 2.38923300   | -0.83540800 | 1 | 1.21609200   | -17.09835100 | 0.36785400  |
| 1 | 5.42373800   | 0.72172600   | -0.88986800 | 1 | 0.19028600   | -18.75489700 | 0.41091800  |
| 1 | 4.24427500   | -1.34955700  | -0.91615000 | 1 | -1.07632000  | -20.77520200 | 0.50357400  |
| 1 | 3.28979500   | -3.00632500  | -0.92343100 | 1 | -10.13208000 | -26.79876900 | 0.28268600  |
| 1 | 2.08807300   | -5.06495900  | -0.90582900 | 1 | -7.71966200  | -26.82144400 | 0.46495200  |
| 1 | 1.11392300   | -6.70918300  | -0.86353300 | 1 | -19.01179400 | -15.14084900 | -0.69498800 |
| 1 | -0.10946400  | -8.75432500  | -0.80363100 | 1 | -20.11107000 | -17.29693300 | -0.81865300 |
| 1 | -1.10161300  | -10.38523000 | -0.71671200 | 1 | -17.01943200 | -11.30886300 | -0.50162000 |
| 1 | -2.34517400  | -12.41703800 | -0.62241400 | 1 | -18.11492500 | -13.42484200 | -0.63944400 |
| 1 | -3.35299200  | -14.03557300 | -0.50163000 | 1 | -14.99829900 | -7.47484800  | -0.29860400 |
| 1 | -4.61434400  | -16.05549900 | -0.38670300 | 1 | -16.11203400 | -9.58458900  | -0.43031500 |
| 1 | -5.63415000  | -17.66370800 | -0.24714500 | 1 | -12.94118700 | -3.66019000  | -0.12413000 |

1 -14.07593200 -5.76006900 -0.23242800  
 1 -10.84550800 0.13391900 -0.00099700  
 1 -12.00299400 -1.95495500 -0.07304800  
 1 -8.70909600 3.90603700 0.05479700  
 1 -9.89047200 1.82966900 0.02756100  
 1 -6.53084300 7.65447600 0.03509200  
 1 -7.73649500 5.59211200 0.05665300  
 1 -4.31116300 11.37789700 -0.05969400  
 1 -5.54041200 9.33049100 0.00905300  
 1 -2.05197000 15.07609800 -0.21960700  
 1 -3.30319000 13.04366600 -0.11110500  
 1 0.24389700 18.75058600 -0.42477400  
 1 -1.02719000 16.73201600 -0.28941200  
 1 2.57047700 22.40317900 -0.64655300  
 1 1.28445000 20.39742100 -0.50257700

6 13.02632300 16.86084600 1.18124900  
 6 11.74918200 16.98453500 1.80981100  
 6 10.81975800 15.98913600 1.75294000  
 6 11.05923100 14.78061300 1.03427000  
 6 12.29337200 14.64683800 0.36229200  
 6 10.33684800 12.56727000 0.20330600  
 6 10.08069700 13.71145000 0.98362700  
 6 8.86112300 13.74753900 1.72815200  
 6 7.99745200 12.69031800 1.74797500  
 6 8.23673900 11.50762200 0.98576600  
 6 9.38494700 11.48172100 0.16816500  
 6 7.59604400 9.26073400 0.17632600  
 6 7.34382700 10.36423800 1.01455400  
 6 6.20600900 10.28936800 1.87478800  
 6 5.41340700 9.17713600 1.92961700  
 6 5.66116800 8.02905500 1.11702700  
 6 6.74250100 8.09865500 0.21655300  
 6 5.13945800 5.74330300 0.32251800  
 6 4.85663900 6.81994800 1.18608700  
 6 3.78190200 6.64700200 2.11051900  
 6 3.06773300 5.48218800 2.18484000  
 6 3.34512000 4.36660100 1.33761600  
 6 4.38118800 4.51933100 0.39515500  
 6 2.96069500 2.05262700 0.54464200  
 6 2.62132900 3.10709400 1.41482100  
 6 1.56514400 2.86572700 2.34565200  
 6 0.91017000 1.66579000 2.40894800  
 6 1.24331300 0.57397300 1.55034000  
 6 2.27772000 0.78490300 0.61728400  
 6 0.96638000 -1.74256100 0.72274800  
 6 0.57157300 -0.71441700 1.60104100  
 6 -0.49455200 -1.00691300 2.50604500  
 6 -1.11603100 -2.22550000 2.52965100  
 6 -0.73675500 -3.28695900 1.65170900  
 6 0.31550600 -3.02933800 0.75114000  
 6 -0.95635200 -5.57870600 0.74296800  
 6 -1.38822400 -4.58599300 1.64484500  
 6 -2.47466500 -4.92097300 2.50991800  
 6 -3.09506200 -6.13874500 2.45921700  
 6 -2.68650000 -7.15965200 1.54723300  
 6 -1.59669800 -6.87040400 0.70349400  
 6 -2.84491500 -9.42773500 0.56824800  
 6 -3.34288300 -8.45282300 1.45657700  
 6 -4.50388300 -8.79227800 2.21473600  
 6 -5.13726300 -9.99559300 2.06867700  
 6 -4.63996800 -11.01069200 1.19641100  
 6 -3.46165800 -10.72787300 0.47883200  
 6 -4.63410000 -13.31717500 0.30489100  
 6 -5.27880500 -12.30571900 1.04481400  
 6 -6.56208600 -12.60878400 1.59439100  
 6 -7.15412600 -13.82679200 1.41128400  
 6 -6.48184800 -14.89714200 0.74508100  
 6 -5.19128600 -14.64722800 0.24244600  
 6 -6.25605200 -17.29040700 0.15355200  
 6 -7.05892000 -16.21934800 0.59977700  
 6 -8.43473900 -16.48511100 0.86945500  
 6 -8.96721600 -17.73228300 0.70771500  
 6 -8.15659600 -18.85507900 0.35440700  
 6 -6.78549500 -18.63490600 0.12578700  
 6 -7.82473100 -21.30567000 0.11290700  
 6 -8.69295900 -20.19872900 0.25913400  
 6 -10.09409600 -20.44368500 0.29611900  
 6 -10.59471500 -21.70985200 0.20989700  
 6 -9.74229500 -22.84909800 0.14438800  
 6 -8.35264700 -22.65204300 0.12626900  
 6 -13.74322900 -19.14225700 -1.90064000  
 6 -14.01765000 -17.91614700 -1.23172000  
 6 -15.27142300 -17.76572500 -0.59350700

### 43. [60]clarene

<2,2,26,2,2,26>

E(wB97XD/cc-pVDZ) = -9216.21044592  
 No imaginary frequency (B3LYP/6-31G\*)

6 12.19308300 25.71580300 -0.08367700  
 6 11.34498800 26.83171200 -0.31261400  
 6 9.96368100 26.61808800 -0.34412100  
 6 9.41085600 25.32862800 -0.22953800  
 6 10.27674600 24.20430400 -0.12583200  
 6 11.64633400 24.44038500 -0.02790000  
 6 16.43598900 26.09484900 -0.27159800  
 6 15.61811000 27.21524900 -0.50240900  
 6 14.22058200 27.14856300 -0.37150500  
 6 13.63469400 25.91131400 -0.00174200  
 6 14.45838900 24.86263400 0.36798500  
 6 15.83782300 24.91398400 0.23370500  
 6 18.53845800 22.36929200 -0.22641400  
 6 17.93681000 23.62821400 -0.11095900  
 6 16.62029000 23.69881300 0.41698000  
 6 16.03649300 22.55965800 0.94871900  
 6 16.59661400 21.29567800 0.78743900  
 6 17.85524300 21.19182200 0.13530100  
 6 -9.41504400 -25.32594200 0.23327400  
 6 -10.28094400 -24.20160600 0.12978900  
 6 -11.65054600 -24.43767600 0.03202400  
 6 -12.19729100 -25.71310100 0.08776000  
 6 -11.34916400 -26.82903100 0.31648200  
 6 -9.96785200 -26.61541200 0.34781300  
 6 -13.63891700 -25.90860900 0.00603400  
 6 -14.46268300 -24.85991300 -0.36349900  
 6 -15.84209100 -24.91126200 -0.22893700  
 6 -16.44016000 -26.09215900 0.27640200  
 6 -15.62224100 -27.21257700 0.50698200  
 6 -14.22473800 -27.14588200 0.37582800  
 6 -16.04089500 -22.55685500 -0.94367400  
 6 -16.60097700 -21.29289000 -0.78213900  
 6 -17.85948200 -21.18910200 -0.12975100  
 6 -18.54263100 -22.36661000 0.23196700  
 6 -17.94100700 -23.62552000 0.11626400  
 6 -16.62459200 -23.69606900 -0.41194500  
 6 16.20276800 18.87178600 0.56236500  
 6 15.81338400 20.11042700 1.08975400  
 6 14.59775300 20.19894400 1.82383300  
 6 13.73866000 19.14518100 1.90566500  
 6 14.01319000 17.91900400 1.23691500  
 6 15.26707500 17.76850400 0.59894100  
 6 13.30240900 15.67918800 0.46782900

|   |              |              |             |   |              |              |             |
|---|--------------|--------------|-------------|---|--------------|--------------|-------------|
| 6 | -16.20709700 | -18.86902000 | -0.55687200 | 6 | 10.08995400  | 20.44636500  | -0.29174900 |
| 6 | -15.81780400 | -20.10760400 | -1.08446200 | 6 | 7.99505100   | 25.08166300  | -0.23635400 |
| 6 | -14.60230200 | -20.19603500 | -1.81876500 | 6 | 7.49597800   | 23.81914700  | -0.15693400 |
| 6 | -10.82429300 | -15.98623300 | -1.74804200 | 6 | 13.32174100  | 28.26091900  | -0.62091300 |
| 6 | -11.06364300 | -14.77778900 | -1.02919900 | 6 | 11.97278100  | 28.11914000  | -0.55335100 |
| 6 | -12.29771100 | -14.64404700 | -0.35707900 | 6 | 18.54265800  | 24.86900300  | -0.56277000 |
| 6 | -13.30675800 | -15.67639400 | -0.46254500 | 6 | 17.84854900  | 26.03623400  | -0.60260000 |
| 6 | -13.03078300 | -16.85798500 | -1.17612000 | 6 | -7.50016000  | -23.81647100 | 0.16062400  |
| 6 | -11.75374400 | -16.98160900 | -1.80490200 | 6 | -7.99923600  | -25.07899200 | 0.23994700  |
| 6 | -8.00177800  | -12.68760400 | -1.74286300 | 6 | -13.32586100 | -28.25825900 | 0.62500100  |
| 6 | -8.24100100  | -11.50492600 | -0.98060800 | 6 | -11.97691300 | -28.11647900 | 0.55721800  |
| 6 | -9.38918900  | -11.47901100 | -0.16297800 | 6 | -18.54677500 | -24.86634700 | 0.56807800  |
| 6 | -10.34112400 | -12.56452900 | -0.19813100 | 6 | -17.85265600 | -26.03357900 | 0.60767900  |
| 6 | -10.08505700 | -13.70867600 | -0.97853000 | 6 | 18.31400800  | 19.87072300  | -0.20401400 |
| 6 | -8.86549800  | -13.74478500 | -1.72307900 | 6 | 17.51240800  | 18.78220700  | -0.04145600 |
| 6 | -5.41766500  | -9.17447600  | -1.92452700 | 6 | 15.53084800  | 16.52955500  | -0.06010100 |
| 6 | -5.66537700  | -8.02640200  | -1.11191600 | 6 | 14.59347900  | 15.54261300  | -0.13115300 |
| 6 | -6.74667200  | -8.09599800  | -0.21139400 | 6 | 12.50865900  | 13.47626700  | -0.42329300 |
| 6 | -7.60023500  | -9.25806100  | -0.17115500 | 6 | 11.57034200  | 12.49512200  | -0.51194100 |
| 6 | -7.34806100  | -10.36156300 | -1.00939700 | 6 | 9.58100100   | 10.36425900  | -0.69406800 |
| 6 | -6.21027700  | -10.28670100 | -1.86967500 | 6 | 8.71982400   | 9.31328800   | -0.70065100 |
| 6 | -3.07194700  | -5.47956200  | -2.17980900 | 6 | 6.97118300   | 6.99993500   | -0.66085600 |
| 6 | -3.34931200  | -4.36396400  | -1.33259400 | 6 | 6.20038900   | 5.88428400   | -0.61905100 |
| 6 | -4.38534500  | -4.51668500  | -0.39009400 | 6 | 4.67046800   | 3.43533400   | -0.48339600 |
| 6 | -5.14361900  | -5.74065300  | -0.31742500 | 6 | 3.99436800   | 2.26244200   | -0.41367700 |
| 6 | -4.86084000  | -6.81730000  | -1.18100300 | 6 | 2.64050000   | -0.28223200  | -0.25388600 |
| 6 | -3.78611800  | -6.64437500  | -2.10545600 | 6 | 2.01840600   | -1.48567000  | -0.20285500 |
| 6 | -0.91437700  | -1.66316900  | -2.40401900 | 6 | 0.72099900   | -4.06373200  | -0.14000400 |
| 6 | -1.24744300  | -0.57136600  | -1.54536700 | 6 | 0.11765000   | -5.27800300  | -0.14283800 |
| 6 | -2.28180800  | -0.78229000  | -0.61226200 | 6 | -1.14430900  | -7.87595400  | -0.19927800 |
| 6 | -2.96481900  | -2.04999800  | -0.53962000 | 6 | -1.73027000  | -9.09787800  | -0.25530600 |
| 6 | -2.62551500  | -3.10445700  | -1.40983200 | 6 | -2.88993700  | -11.75316900 | -0.33138300 |
| 6 | -1.56937800  | -2.86309400  | -2.34071300 | 6 | -3.43054500  | -12.99775400 | -0.38865900 |
| 6 | 1.11197400   | 2.22804800   | -2.52468800 | 6 | -4.43781500  | -15.73916800 | -0.28483300 |
| 6 | 0.73272000   | 3.28952200   | -1.64675600 | 6 | -4.92817000  | -17.00806300 | -0.28386700 |
| 6 | -0.31956700  | 3.03193800   | -0.74620500 | 6 | -5.94448600  | -19.76984800 | -0.09322600 |
| 6 | -0.97042400  | 1.74515500   | -0.71776100 | 6 | -6.43146400  | -21.04146700 | -0.05927500 |
| 6 | -0.57567200  | 0.71701100   | -1.59607800 | 6 | -17.51662000 | -18.77950800 | 0.04721300  |
| 6 | 0.49044100   | 1.00948600   | -2.50110200 | 6 | -18.31818400 | -19.86804500 | 0.20980400  |
| 6 | 3.09112300   | 6.14123400   | -2.45425000 | 6 | -14.59772100 | -15.53989800 | 0.13668500  |
| 6 | 2.68255000   | 7.16217700   | -1.54231200 | 6 | -15.53508800 | -16.52684800 | 0.06570900  |
| 6 | 1.59272600   | 6.87296700   | -0.69858300 | 6 | -11.57458100 | -12.49237700 | 0.51718100  |
| 6 | 0.95233700   | 5.58128800   | -0.73806400 | 6 | -12.51291800 | -13.47350600 | 0.42857100  |
| 6 | 1.38422500   | 4.58854000   | -1.63989300 | 6 | -8.72400300  | -9.31060000  | 0.70584400  |
| 6 | 2.47070500   | 4.92347200   | -2.50493500 | 6 | -9.58519700  | -10.36155700 | 0.69927600  |
| 6 | 5.13331200   | 9.99810900   | -2.06383800 | 6 | -6.20448900  | -5.88164600  | 0.62421400  |
| 6 | 4.63596500   | 11.01326000  | -1.19165700 | 6 | -6.97528200  | -6.99729300  | 0.66605600  |
| 6 | 3.45763500   | 10.73047200  | -0.47410500 | 6 | -3.99846700  | -2.25980200  | 0.41873100  |
| 6 | 2.84094800   | 9.43029900   | -0.56341900 | 6 | -4.67458000  | -3.43268300  | 0.48846800  |
| 6 | 3.33893800   | 8.45534900   | -1.45169300 | 6 | -2.02236500  | 1.48824600   | 0.20793800  |
| 6 | 4.49994900   | 8.79478000   | -2.20985200 | 6 | -2.64448300  | 0.28482400   | 0.25898100  |
| 6 | 7.15013800   | 13.82934800  | -1.40650600 | 6 | -0.12175700  | 5.28065400   | 0.14765700  |
| 6 | 6.47779600   | 14.89974600  | -0.74044300 | 6 | -0.72512500  | 4.06639500   | 0.14484200  |
| 6 | 5.18718200   | 14.64987300  | -0.23792200 | 6 | 1.72635200   | 9.10044500   | 0.26019800  |
| 6 | 4.63000400   | 13.31981200  | -0.30031300 | 6 | 1.14038600   | 7.87852300   | 0.20420700  |
| 6 | 5.27477500   | 12.30830800  | -1.04011300 | 6 | 3.42640400   | 13.00043300  | 0.39317600  |
| 6 | 6.55810500   | 12.61133600  | -1.58959700 | 6 | 2.88583000   | 11.75582900  | 0.33597400  |
| 6 | 8.96315200   | 17.73489700  | -0.70306300 | 6 | 4.92400700   | 17.01075300  | 0.28816100  |
| 6 | 8.15248100   | 18.85772800  | -0.34998800 | 6 | 4.43365800   | 15.74185300  | 0.28919100  |
| 6 | 6.78135900   | 18.63756900  | -0.12147900 | 6 | 6.42728000   | 21.04415300  | 0.06322800  |
| 6 | 6.25193300   | 17.29306100  | -0.14914400 | 6 | 5.94031600   | 19.77253100  | 0.09730200  |
| 6 | 7.05485400   | 16.22196100  | -0.59517600 | 1 | 9.29179600   | 27.46937200  | -0.48244000 |
| 6 | 8.43070600   | 16.48769900  | -0.86471400 | 1 | 12.31250300  | 23.58965200  | 0.06220600  |
| 6 | 10.59055300  | 21.71254700  | -0.20565600 | 1 | 16.07591300  | 28.14799800  | -0.84281400 |
| 6 | 9.73811300   | 22.85179000  | -0.14035000 | 1 | 13.99849900  | 23.94018300  | 0.70028400  |
| 6 | 8.34846600   | 22.65472600  | -0.12234000 | 1 | 19.53000900  | 22.28912000  | -0.67990700 |
| 6 | 7.82056000   | 21.30834900  | -0.10885400 | 1 | 15.05654800  | 22.63764200  | 1.40621500  |
| 6 | 8.68881600   | 20.20139900  | -0.25484700 | 1 | -12.31673400 | -23.58693500 | -0.05788000 |

|   |              |              |             |   |              |              |             |
|---|--------------|--------------|-------------|---|--------------|--------------|-------------|
| 1 | -9.29594800  | -27.46670700 | 0.48596900  | 1 | 19.58482400  | 24.84545100  | -0.88944700 |
| 1 | -14.00285400 | -23.93745800 | -0.69587200 | 1 | 18.33806500  | 26.94732700  | -0.95426000 |
| 1 | -16.07998200 | -28.14535300 | 0.84739700  | 1 | -6.41855900  | -23.68775900 | 0.16722300  |
| 1 | -15.06104400 | -22.63479400 | -1.40138000 | 1 | -7.31845100  | -25.93038400 | 0.30631100  |
| 1 | -19.53409600 | -22.28648500 | 0.68565700  | 1 | -13.75925500 | -29.23269800 | 0.86162200  |
| 1 | 14.33958700  | 21.12100900  | 2.34291600  | 1 | -11.33051400 | -28.97954400 | 0.73222600  |
| 1 | 12.82112900  | 19.26828800  | 2.47745600  | 1 | -19.58888000 | -24.84282200 | 0.89494800  |
| 1 | 11.49172600  | 17.89114900  | 2.35397700  | 1 | -18.34210100 | -26.94470700 | 0.95934800  |
| 1 | 9.86462600   | 16.14645600  | 2.25074300  | 1 | 19.30014900  | 19.75613200  | -0.65917300 |
| 1 | 8.60818400   | 14.62844100  | 2.31582300  | 1 | 17.88268600  | 17.81224300  | -0.37245300 |
| 1 | 7.09111700   | 12.77589800  | 2.34571800  | 1 | 16.49152300  | 16.36789300  | -0.54725700 |
| 1 | 5.95400400   | 11.13325100  | 2.51546500  | 1 | 14.85346000  | 14.62749900  | -0.66001100 |
| 1 | 4.56213400   | 9.18443500   | 2.60957900  | 1 | 13.43676800  | 13.35306300  | -0.97806100 |
| 1 | 3.51598700   | 7.45793900   | 2.78751100  | 1 | 11.79810200  | 11.62459000  | -1.12324100 |
| 1 | 2.26315500   | 5.41741900   | 2.91701300  | 1 | 10.42760300  | 10.33902700  | -1.37676600 |
| 1 | 1.25980100   | 3.65567900   | 3.03125000  | 1 | 8.92468300   | 8.49174700   | -1.38260200 |
| 1 | 0.11222500   | 1.55224300   | 3.14243300  | 1 | 7.77259200   | 7.03826200   | -1.39448400 |
| 1 | -0.83748600  | -0.24054100  | 3.20066600  | 1 | 6.42542400   | 5.08417700   | -1.31927500 |
| 1 | -1.92648900  | -2.37730600  | 3.24206700  | 1 | 5.44693400   | 3.52962400   | -1.23768400 |
| 1 | -2.83784100  | -4.18738400  | 3.22895100  | 1 | 4.26216500   | 1.47795000   | -1.11614100 |
| 1 | -3.92534500  | -6.32442700  | 3.13994400  | 1 | 3.43378200   | -0.15098900  | -0.98459200 |
| 1 | -4.92803500  | -8.06652900  | 2.90731700  | 1 | 2.34357600   | -2.25593900  | -0.89670300 |
| 1 | -6.03710500  | -10.18265000 | 2.65427800  | 1 | 1.52893800   | -3.89648200  | -0.84688900 |
| 1 | -7.11915200  | -11.83623000 | 2.12451400  | 1 | 0.47358400   | -6.02053800  | -0.85182300 |
| 1 | -8.15574300  | -13.98133700 | 1.81162600  | 1 | -0.30912900  | -7.68219400  | -0.86682000 |
| 1 | -9.09713400  | -15.67139600 | 1.16403700  | 1 | -1.33891700  | -9.81997200  | -0.96765000 |
| 1 | -10.03298900 | -17.86176400 | 0.88996900  | 1 | -1.98092600  | -11.56473800 | -0.89731800 |
| 1 | -10.79465600 | -19.61236800 | 0.36604000  | 1 | -2.94197000  | -13.74685200 | -1.00876900 |
| 1 | -11.67643200 | -21.83107200 | 0.22711100  | 1 | -3.42537200  | -15.57756700 | -0.64986600 |
| 1 | -12.82580000 | -19.26529900 | -2.47261100 | 1 | -4.29694100  | -17.80927000 | -0.66430900 |
| 1 | -14.34421500 | -21.11804300 | -2.33798900 | 1 | -4.87516100  | -19.63175300 | -0.24425100 |
| 1 | -9.86924300  | -16.14350500 | -2.24601600 | 1 | -5.73448100  | -21.86670900 | -0.19742200 |
| 1 | -11.49638700 | -17.88815700 | -2.34922700 | 1 | -17.88682900 | -17.80958500 | 0.37840400  |
| 1 | -7.09544800  | -12.77320200 | -2.34061200 | 1 | -19.30423300 | -19.75351300 | 0.66517900  |
| 1 | -8.61259200  | -14.62567700 | -2.31078100 | 1 | -14.85761800 | -14.62485200 | 0.66570000  |
| 1 | -4.56642800  | -9.18177400  | -2.60453300 | 1 | -16.49566900 | -16.36524900 | 0.55307200  |
| 1 | -5.95832700  | -11.13057100 | -2.51039100 | 1 | -11.80229600 | -11.62185500 | 1.12851100  |
| 1 | -2.26737300  | -5.41481300  | -2.91198800 | 1 | -13.44099200 | -13.35028900 | 0.98339300  |
| 1 | -3.52020300  | -7.45532900  | -2.78242600 | 1 | -8.92885300  | -8.48904600  | 1.38778000  |
| 1 | -0.11646800  | -1.54962700  | -3.13754600 | 1 | -10.43179700 | -10.33629800 | 1.38197300  |
| 1 | -1.26408800  | -3.65304000  | -3.02634300 | 1 | -6.42945300  | -5.08156200  | 1.32448600  |
| 1 | 1.92245200   | 2.37982400   | -3.23708900 | 1 | -7.77660100  | -7.03565600  | 1.39978000  |
| 1 | 0.83334500   | 0.24311000   | -3.19573400 | 1 | -4.26622200  | -1.47531500  | 1.12121200  |
| 1 | 3.92144300   | 6.32687100   | -3.13494500 | 1 | -5.45101300  | -3.52697100  | 1.24278800  |
| 1 | 2.83391100   | 4.18984400   | -3.22391500 | 1 | -2.34740900  | 2.25847800   | 0.90188500  |
| 1 | 6.03315100   | 10.18516300  | -2.64944600 | 1 | -3.43769200  | 0.15356900   | 0.98976200  |
| 1 | 4.92409800   | 8.06901500   | -2.90241700 | 1 | -0.47777200  | 6.02325000   | 0.85653600  |
| 1 | 8.15179700   | 13.98385800  | -1.80675100 | 1 | -1.53317400  | 3.89922200   | 0.85161600  |
| 1 | 7.11522200   | 11.83873500  | -2.11959600 | 1 | 1.33508400   | 9.82252500   | 0.97260400  |
| 1 | 10.02894200  | 17.86436800  | -0.88522600 | 1 | 0.30526200   | 7.68476000   | 0.87181500  |
| 1 | 9.09315300   | 15.67396000  | -1.15911600 | 1 | 2.93777000   | 13.74958000  | 1.01318000  |
| 1 | 11.67226900  | 21.83378100  | -0.22282100 | 1 | 1.97677900   | 11.56742200  | 0.90185300  |
| 1 | 10.79052500  | 19.61504500  | -0.36150500 | 1 | 4.29273500   | 17.81199100  | 0.66846400  |
| 1 | 7.31426100   | 25.93303700  | -0.30291000 | 1 | 3.42117800   | 15.58027600  | 0.65413500  |
| 1 | 6.41437800   | 23.69042300  | -0.16364500 | 1 | 5.73027300   | 21.86940600  | 0.20118300  |
| 1 | 13.75517000  | 29.23534200  | -0.85753600 | 1 | 4.87097700   | 19.63444000  | 0.24823500  |
| 1 | 11.32641500  | 28.98219400  | -0.72853900 |   |              |              |             |

## References

- (1) Grimme, S.; Bannwarth, C.; Shushkov, P. A Robust and Accurate Tight-Binding Quantum Chemical Method for Structures, Vibrational Frequencies, and Noncovalent Interactions of Large Molecular Systems Parametrized for All spd-Block Elements ( $Z = 1-86$ ). *J. Chem. Theory Comput.* **2017**, *13*, 1989–2009.
- (2) Bannwarth, C.; Ehlert, S.; Grimme, S. GFN2-xTB—An Accurate and Broadly Parametrized Self-Consistent Tight-Binding Quantum Chemical Method with Multipole Electrostatics and Density-Dependent Dispersion Contributions. *J. Chem. Theory Comput.* **2019**, *15*, 1652–1671.
- (3) Semiempirical Extended Tight-Binding Program Package. 2020; <https://github.com/grimme-lab/xtb/tree/v6.3.3>, (accessed March 29, 2023).
- (4) Bannwarth, C.; Caldeweyher, E.; Ehlert, S.; Hansen, A.; Pracht, P.; Seibert, J.; Spicher, S.; Grimme, S. Extended tight-binding quantum chemistry methods. *WIREs Comput. Mol. Sci.* **2021**, *11*, e1493.
- (5) Diederich, F.; Staab, H. A. Benzenoid versus Annulenoid Aromaticity: Synthesis and Properties of Kekulene. *Angew. Chem. Int. Ed.* **1978**, *17*, 372–374.
- (6) Krieger, C.; Diederich, F.; Schweitzer, D.; Staab, H. A. Molecular Structure and Spectroscopic Properties of Kekulene. *Angew. Chem. Int. Ed.* **1979**, *18*, 699–701.
- (7) Staab, H. A.; Diederich, F. Cycloarenes, a New Class of Aromatic Compounds, I. Synthesis of Kekulene. *Chem. Ber.* **1983**, *116*, 3487–3503.
- (8) Pozo, I.; Majzik, Z.; Pavliček, N.; Melle-Franco, M.; Guitián, E.; Peña, D.; Gross, L.; Pérez, D. Revisiting Kekulene: Synthesis and Single-Molecule Imaging. *J. Am. Chem. Soc.* **2019**, *141*, 15488–15493.
- (9) Lee, C.; Yang, W.; Parr, R. G. Development of the Colle–Salvetti Correlation-Energy Formula Into a Functional of the Electron Density. *Phys. Rev. B* **1988**, *37*, 785–789.
- (10) Becke, A. D. Density-Functional Thermochemistry. III. The Role of Exact Exchange. *J. Chem. Phys.* **1993**, *98*, 5648–5652.
- (11) Chai, J.-D.; Head-Gordon, M. Long-Range Corrected Hybrid Density Functionals With Damped Atom–Atom Dispersion Corrections. *Phys. Chem. Chem. Phys.* **2008**, *10*, 6615–6620.

- (12) Dunning, T. H. Gaussian basis sets for use in correlated molecular calculations. I. The atoms boron through neon and hydrogen. *J. Chem. Phys.* **1989**, *90*, 1007–1023.
- (13) Fan, W.; Han, Y.; Wang, X.; Hou, X.; Wu, J. Expanded Kekulenes. *J. Am. Chem. Soc.* **2021**, *143*, 13908–13916.
- (14) Barber, D. Some notes on tessellations of equiangular hexagons. 2023; [http://tamivox.org/redbear/isogon\\_hex/index.html](http://tamivox.org/redbear/isogon_hex/index.html), (2023, Dec 14).
- (15) Lu, T.; Chen, Q. Interaction Region Indicator: A Simple Real Space Function Clearly Revealing Both Chemical Bonds and Weak Interactions. *Chem. Methods* **2021**, *1*, 231–239.
- (16) Kruszewski, J.; Krygowski, T. Definition of Aromaticity Basing on the Harmonic Oscillator Model. *Tetrahedron Lett.* **1972**, *13*, 3839–3842.
- (17) Wang, Y. Quantitative Resonance Theory Based on the Clar Sextet Model. *J. Phys. Chem. A* **2022**, *126*, 164–176.
